# Supplementary material
Source: Research Square preprint supplement (doi:10.21203/rs.3.rs-9795398/v1)
Supplement: Supplementary file 1 [file 410c97246245e40164ef4894.xlsx]

## Sheet: Sheet1
Table S4. GWAS and candidate genes of strawberry fruit soluble solids content (SSC)
Chr	Pos	P value for SSC in the fruit tips (SSCt)	-log10P for SSC in the fruit tips (SSCt)	P value for SSC in the middle parts (SSCm)	-log10P for SSC in the middle parts (SSCm)	P value for SSC iin the fruit shoulders (SSCs)	-log10P for SSC iin the fruit shoulders (SSCs)	Allele	Count	MAF	Gene Name	Gene ID	Strand	Start	End	Distance	COG class annotation	KEGG annotation	KOG class annotation	Pfam annotation	Swissprot annotation	eggNOG class annotation	Nr annotation
Fvb1-1	255491	7.26603e-07	6.14	3.61234e-06	5.44	9.94403e-06	5	T/C	T:131_C:19	0.13
Fvb1-1	10125579	1.86854e-06	5.73	9.98194e-06	5	1.12609e-05	4.94843	T/C	T:112_C:22	0.16	MYB29	maker-Fvb1-1-snap-gene-101.33	-	10102745	10104205	5'_21374	--	K09422|6.6e-131|fve:101311628|K09422 transcription factor MYB, plant | (RefSeq) transcription factor MYB29-like	Transcription	Myb-like DNA-binding domain	Transcription factor DUO1 OS=Arabidopsis thaliana OX=3702 GN=DUO1 PE=1 SV=1	--	Transcription factor MYB29-like [Fragaria vesca subsp. vesca]
Fvb1-1	24606136	0.00434299	2.36221	0.000137515	3.86165	8.64406e-06	5.06	A/C	A:139_C:13	0.09
Fvb1-2	16284802	2.44992e-05	4.61085	2.02579e-05	4.69341	1.83182e-06	5.74	C/A	C:96_A:12	0.11	FK4	augustus_masked-Fvb1-2-processed-gene-164.0	+	16383419	16389916	5'_98617	Carbohydrate transport and metabolism	K00847|4.6e-93|fve:101309789|K00847 fructokinase [EC:2.7.1.4] | (RefSeq) probable fructokinase-4	Carbohydrate transport and metabolism	pfkB family carbohydrate kinase	Probable fructokinase-4 OS=Arabidopsis thaliana OX=3702 GN=At3g59480 PE=2 SV=1	Carbohydrate transport and metabolism	Probable fructokinase-4 [Rosa chinensis]
											WRKY51	maker-Fvb1-2-snap-gene-163.35	-	16330435	16332723	3'_45633	--	K13424|1.0e-21|jre:108995192|K13424 WRKY transcription factor 33 | (RefSeq) probable WRKY transcription factor 33	--	WRKY DNA -binding domain	Probable WRKY transcription factor 51 OS=Arabidopsis thaliana OX=3702 GN=WRKY51 PE=1 SV=1	Transcription	Probable WRKY transcription factor 51 [Fragaria vesca subsp. vesca]
Fvb2-1	8350256	0.000618452	3.20869	4.03277e-05	4.3944	3.05252e-06	5.52	C/A	C:134_A:10	0.07	CYP707A3	maker-Fvb2-1-snap-gene-83.36	+	8328122	8330400	3'_19856	--	K09843|4.8e-65|csat:104724884|K09843 (+)-abscisic acid 8'-hydroxylase [EC:1.14.14.137] | (RefSeq) abscisic acid 8'-hydroxylase 3 isoform X2	--	Cytochrome P450	Abscisic acid 8'-hydroxylase 3 OS=Arabidopsis thaliana OX=3702 GN=CYP707A3 PE=1 SV=1	Secondary metabolites biosynthesis, transport and catabolism	Abscisic acid 8'-hydroxylase 3-like [Fragaria vesca subsp. vesca]
Fvb2-1	8350257	0.000618452	3.20869	4.03277e-05	4.3944	3.05252e-06	5.52	A/T	A:134_T:10	0.07
Fvb2-1	8350312	0.000618452	3.20869	4.03277e-05	4.3944	3.05252e-06	5.52	A/G	A:134_G:10	0.07
Fvb2-1	24235900	4.36589e-06	5.35993	1.14437e-05	4.94143	0.000219365	3.65883	T/C	T:125_C:11	0.08
Fvb2-2	1318500	7.88748e-06	5.1	4.97707e-05	4.30303	0.000128893	3.88977	G/A	G:100_A:12	0.11	SQD1	maker-Fvb2-2-augustus-gene-13.47	+	1335440	1338847	5'_16940	Cell wall/membrane/envelope biogenesis	K06118|2.2e-279|fve:101311063|K06118 UDP-sulfoquinovose synthase [EC:3.13.1.1] | (RefSeq) UDP-sulfoquinovose synthase, chloroplastic	Cell wall/membrane/envelope biogenesis	NAD dependent epimerase/dehydratase family	UDP-sulfoquinovose synthase, chloroplastic OS=Arabidopsis thaliana OX=3702 GN=SQD1 PE=1 SV=1	Cell wall/membrane/envelope biogenesis	UDP-sulfoquinovose synthase, chloroplastic [Fragaria vesca subsp. vesca]
Fvb2-2	1318531	8.87477e-06	5.05	5.16565e-05	4.28688	0.000108681	3.96385	T/G	T:102_G:12	0.11	B3GALT12	maker-Fvb2-2-augustus-gene-13.51	-	1294341	1298161	5'_20339	--	K20855|2.8e-40|nto:104101762|K20855 beta-1,3-galactosyltransferase 1/2/3/4/5/7/8 [EC:2.4.1.-] | (RefSeq) beta-1,3-galactosyltransferase 7-like	Carbohydrate transport and metabolism	Galactosyltransferase	Probable beta-1,3-galactosyltransferase 12 OS=Arabidopsis thaliana OX=3702 GN=B3GALT12 PE=2 SV=1	Carbohydrate transport and metabolism	Probable beta-1,3-galactosyltransferase 12 [Fragaria vesca subsp. vesca]
											KUA1	maker-Fvb2-2-augustus-gene-12.56	+	1223583	1225000	3'_93500	--	K08869|1.6e-11|cre:CHLREDRAFT_165812|K08869 aarF domain-containing kinase | (RefSeq) predicted protein	--	Myb-like DNA-binding domain	Transcription factor KUA1 OS=Arabidopsis thaliana OX=3702 GN=KUA1 PE=1 SV=1	Transcription	Myb-like protein J [Fragaria vesca subsp. vesca]
Fvb2-4	24524008	7.02638e-06	5.15	2.78368e-05	4.55538	0.000335539	3.47426	G/A	G:118_A:8	0.06	WRKY17	maker-Fvb2-4-augustus-gene-245.57	-	24529629	24531267	3'_5621	--	K13425|1.4e-25|han:110922953|K13425 WRKY transcription factor 22 | (RefSeq) WRKY transcription factor 22-like	--	WRKY DNA -binding domain	Probable WRKY transcription factor 17 OS=Arabidopsis thaliana OX=3702 GN=WRKY17 PE=1 SV=2	Transcription	Probable WRKY transcription factor 17 [Fragaria vesca subsp. vesca]
Fvb3-1	28935981	2.64864e-05	4.57698	7.8723e-06	5.1	6.78218e-05	4.16863	G/T	G:135_T:17	0.11
Fvb3-2	17578719	1.618e-05	4.79102	8.94453e-06	5.05	3.26687e-05	4.48587	C/T	C:118_T:8	0.06
Fvb3-3	8209809	1.31622e-05	4.88067	3.58981e-06	5.44	3.97041e-07	6.4	C/G	C:56_G:46	0.45	RBSK	maker-Fvb3-3-augustus-gene-82.49	+	8261347	8265630	5'_51538	Carbohydrate transport and metabolism	K00852|1.8e-207|fve:101295116|K00852 ribokinase [EC:2.7.1.15] | (RefSeq) ribokinase	Carbohydrate transport and metabolism	pfkB family carbohydrate kinase	Ribokinase OS=Arabidopsis thaliana OX=3702 GN=RBSK PE=1 SV=1	Carbohydrate transport and metabolism	Ribokinase isoform X1 [Fragaria vesca subsp. vesca]
Fvb4-1	22124	1.09515e-06	5.96	5.77045e-07	6.24	5.67637e-07	6.25	C/T	C:78_T:6	0.07	EGases6	maker-Fvb4-1-augustus-gene-0.26	-	52390	56239	3'_30266	--	K19893|1.7e-282|fve:101309240|K19893 glucan endo-1,3-beta-glucosidase 5/6 [EC:3.2.1.39] | (RefSeq) glucan endo-1,3-beta-glucosidase 6	--	Glycosyl hydrolases family 17	Glucan endo-1,3-beta-glucosidase 6 OS=Arabidopsis thaliana OX=3702 GN=At5g58090 PE=2 SV=2	Carbohydrate transport and metabolism	Glucan endo-1,3-beta-glucosidase 6 [Fragaria vesca subsp. vesca]
Fvb4-1	20009495	4.63956e-06	5.33	4.61062e-05	4.33624	0.0007727	3.11199	A/T	A:124_T:8	0.06
Fvb4-2	3740807	0.000223515	3.65069	2.60654e-05	4.58394	5.14079e-06	5.29	G/T	G:106_T:6	0.05	UTR4	maker-Fvb4-2-snap-gene-36.63	+	3647229	3650860	3'_89947	--	K15277|1.5e-189|fve:101305169|K15277 solute carrier family 35 (adenosine 3'-phospho 5'-phosphosulfate transporter), member B3 | (RefSeq) UDP-galactose/UDP-glucose transporter 2-like	Carbohydrate transport and metabolism	UAA transporter family	UDP-galactose/UDP-glucose transporter 4 OS=Arabidopsis thaliana OX=3702 GN=UTR4 PE=2 SV=1	Carbohydrate transport and metabolism	UDP-galactose/UDP-glucose transporter 2-like [Fragaria vesca subsp. vesca]
Fvb5-1	9814088	3.79925e-06	5.42	2.74793e-06	5.56	5.70972e-06	5.24	A/G	A:55_G:69	0.44	bHLH79	maker-Fvb5-1-augustus-gene-98.47	+	9824435	9828665	5'_10347	--	K18878|2.0e-27|cann:107866053|K18878 BHLH transcription factor Upa20 | (RefSeq) Upa20; transcription factor bHLH137-like	--	Helix-loop-helix DNA-binding domain	Transcription factor bHLH79 OS=Arabidopsis thaliana OX=3702 GN=BHLH79 PE=1 SV=1	Transcription	Transcription factor bHLH79 isoform X1 [Fragaria vesca subsp. vesca]
											MYB35	maker-Fvb5-1-snap-gene-98.55	+	9814780	9821449	5'_692	--	K09422|1.3e-185|fve:101309551|K09422 transcription factor MYB, plant | (RefSeq) myb-related protein 315	Transcription	Myb-like DNA-binding domain	Transcription factor MYB35 OS=Arabidopsis thaliana OX=3702 GN=MYB35 PE=1 SV=1	--	Myb-related protein 315 [Fragaria vesca subsp. vesca]
Fvb5-2	15197875	1.37422e-05	4.86194	2.01465e-06	5.7	2.45794e-05	4.60943	A/C	A:91_C:21	0.19
Fvb5-3	16812124	5.68483e-05	4.24528	3.38969e-05	4.46984	3.90358e-06	5.41	C/T	C:64_T:16	0.2	HAT4	maker-Fvb5-3-augustus-gene-168.19	-	16795789	16798287	5'_13837	--	K09338|1.2e-159|fve:101291927|K09338 homeobox-leucine zipper protein | (RefSeq) homeobox-leucine zipper protein HAT4-like	Transcription	HD-ZIP protein N terminus	Homeobox-leucine zipper protein HAT4 OS=Arabidopsis thaliana OX=3702 GN=HAT4 PE=1 SV=1	Transcription	Homeobox-leucine zipper protein HAT4-like [Fragaria vesca subsp. vesca]
											MYB1R1	maker-Fvb5-3-augustus-gene-169.36	+	16901643	16904806	5'_89519	--	K08869|2.8e-23|cre:CHLREDRAFT_165812|K08869 aarF domain-containing kinase | (RefSeq) predicted protein	--	Myb-like DNA-binding domain	Transcription factor KUA1 OS=Arabidopsis thaliana OX=3702 GN=KUA1 PE=1 SV=1	Transcription	Transcription factor MYB1R1 [Fragaria vesca subsp. vesca]
Fvb5-4	8675813	0.000477126	3.32137	2.32023e-05	4.63447	3.45354e-06	5.46	T/C	T:144_C:8	0.05
Fvb5-4	8675861	0.000477126	3.32137	2.32023e-05	4.63447	3.45354e-06	5.46	C/T	C:144_T:8	0.05
Fvb6-1	33853957	3.80126e-06	5.42	1.59988e-05	4.79591	0.000346728	3.46001	G/C	G:133_C:7	0.05	SUS2.2	maker-Fvb6-1-augustus-gene-338.39	+	33789005	33797220	3'_56737	General function prediction only	K00695|9.4e-111|mtr:MTR_6g478030|K00695 sucrose synthase [EC:2.4.1.13] | (RefSeq) sucrose synthase	--	TIR domain	sucrose synthase	Function unknown	sucrose synthase
											SUS3	maker-Fvb6-1-augustus-gene-338.47	-	33826962	33830846	5'_23111	General function prediction only	K00695|3.9e-109|mtr:MTR_6g478030|K00695 sucrose synthase [EC:2.4.1.13] | (RefSeq) sucrose synthase	--	TIR domain	sucrose synthase	Function unknown	sucrose synthase
Fvb6-2	14746094	9.96574e-06	5	0.000276825	3.55779	0.000200619	3.69763	T/C	T:59_C:39	0.4	ARF31	maker-Fvb6-2-augustus-gene-146.22	+	14650038	14653880	3'_92214	--	K09287|1.3e-37|smo:SELMODRAFT_110104|K09287 RAV-like factor | (RefSeq) hypothetical protein	--	B3 DNA binding domain	B3 domain-containing protein At2g36080 OS=Arabidopsis thaliana OX=3702 GN=ARF31 PE=2 SV=1	Transcription	B3 domain-containing protein At2g36080-like [Fragaria vesca subsp. vesca]
											NAC090	maker-Fvb6-2-augustus-gene-147.34	-	14739965	14742153	5'_3941	--	K00521|3.0e-32|cmos:111447866|K00521 ferric-chelate reductase [EC:1.16.1.7] | (RefSeq) ferric reduction oxidase 7, chloroplastic-like	--	No apical meristem (NAM) protein	NAC domain-containing protein 90 OS=Arabidopsis thaliana OX=3702 GN=NAC090 PE=1 SV=1	Transcription	NAC domain-containing protein 90-like [Fragaria vesca subsp. vesca]
Fvb7-3	402387	1.92138e-05	4.71639	9.99038e-06	5	0.000175112	3.75668	G/A	G:102_A:8	0.07	AGL15	snap_masked-Fvb7-3-processed-gene-4.29	-	397223	397855	5'_4532	--	K09264|1.9e-12|aly:9305030|K09264 MADS-box transcription factor, plant | (RefSeq) agamous-like MADS-box protein AGL21 isoform X1	Transcription	SRF-type transcription factor (DNA-binding and dimerisation domain)	Agamous-like MADS-box protein AGL15 OS=Arabidopsis thaliana OX=3702 GN=AGL15 PE=1 SV=1	Transcription	Agamous-like MADS-box protein AGL15 [Fragaria vesca subsp. vesca]
Fvb7-3	7720271	8.7806e-06	5.06	0.000520412	3.28365	0.00855007	2.06803	G/C	G:101_C:51	0.34
Fvb7-3	7720273	8.7806e-06	5.06	0.000520412	3.28365	0.00855007	2.06803	A/C	A:101_C:51	0.34
Fvb7-3	8904674	5.40183e-06	5.27	2.60522e-05	4.58416	0.000597629	3.22357	T/G	T:92_G:48	0.34
Fvb7-3	8904870	8.24478e-06	5.08	3.19568e-05	4.49544	0.000691194	3.1604	G/A	G:94_A:48	0.34
Fvb7-3	9079150	8.50132e-06	5.07	0.000103518	3.98499	0.000582674	3.23457	G/A	G:106_A:44	0.29
Fvb7-3	24997312	2.29503e-06	5.64	3.87693e-06	5.41	0.000104434	3.98116	G/T	G:94_T:20	0.18
