# Supplementary material
Source: Research Square preprint supplement (doi:10.21203/rs.3.rs-9795398/v1)
Supplement: Supplementary file 1 [file 9221fc88ceb0c3625a4f8e0e.docx]

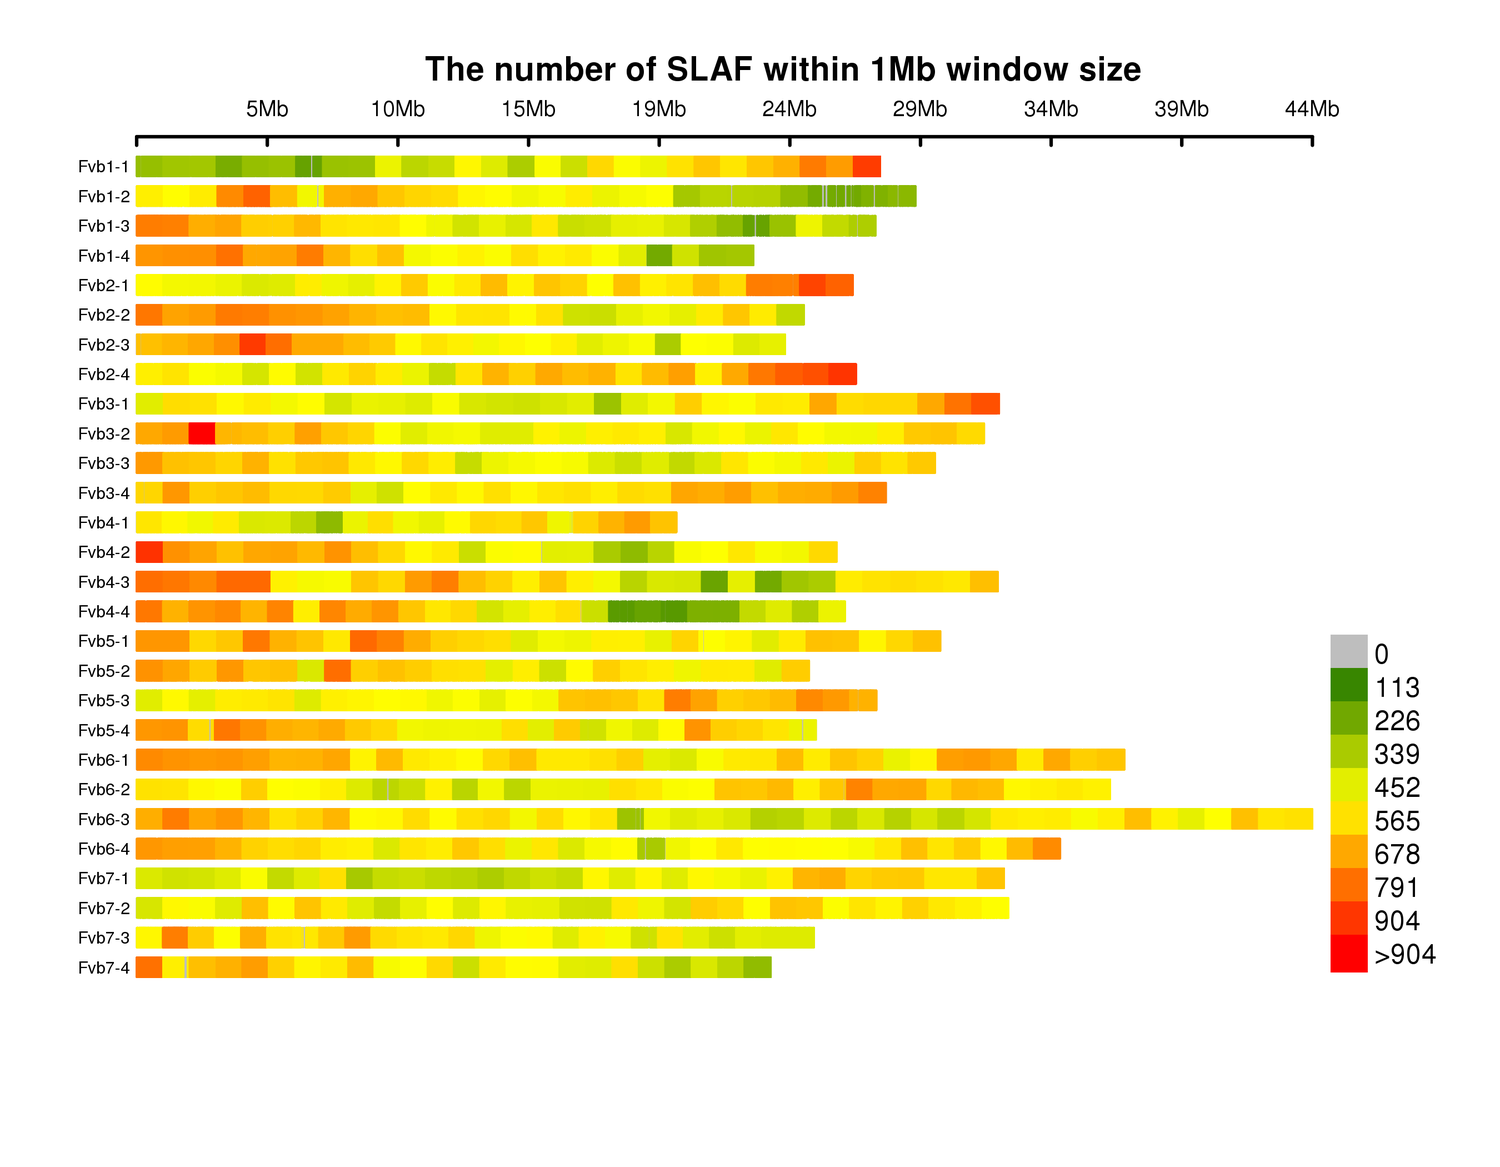


Figure S1. Heatmap of SLAF marker density on chromosomes.

The values indicate the relative density of SLAF markers per Mb window (higher values indicate greater density).


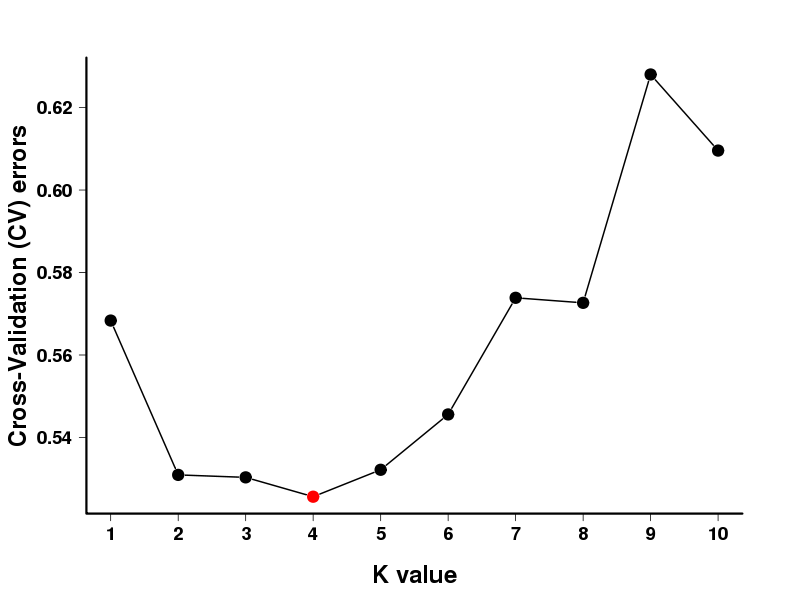


Figure S2. Cross-validation (CV) error of the entire population (76 accessions), reaching a minimum at K=4.
