# Supplementary material
Source: Research Square preprint supplement (doi:10.21203/rs.3.rs-9795398/v1)
Supplement: Supplementary file 2 [file 7fe559071ee16d3252c99407.xlsx]

## Sheet: Sheet1
Table S3. GWAS and candidate genes of strawberry fruit firmness
Chr	Pos	P value for fruit firmness at the left shoulders (FFl)	-log10 P for fruit firmness at the left shoulders (FFl)	P value for fruit firmness at the right shoulders (FFr)	-log10 P for fruit firmness at the right shoulders (FFr)	Allele	Count	MAF	Gene Name	GeneID	Strand	Start	End	Distance	COG class annotation	KEGG annotation	KOG class annotation	Pfam annotation	Swissprot annotation	eggNOG class annotation	Nr annotation
Fvb1-2	17103435	1.45832e-08	7.84	1.94609e-06	5.71084	C/A	C:134_A:8	0.06	PME58.1	maker-Fvb1-2-augustus-gene-170.24	+	17029156	17031797	3'_71638	--	K01051	Transcription	Myb/SANT-like DNA-binding domain	Trihelix transcription factor DF1 OS=Arabidopsis thaliana OX=3702 GN=DF1 PE=4 SV=1	Transcription	Trihelix transcription factor GT-2-like [Fragaria vesca subsp. vesca]
Fvb1-2	17103626	1.93667e-08	7.71	2.20892e-06	5.66	G/T	G:136_T:8	0.06
Fvb1-2	18004538	9.82683e-06	5.01	0.00016441	3.78407	G/C	G:131_C:11	0.08	XTH23.1	maker-Fvb1-2-augustus-gene-179.42	+	17946590	17948434	3'_56104	Carbohydrate transport and metabolism	K08235	--	Glycosyl hydrolases family 16	Probable xyloglucan endotransglucosylase/hydrolase protein 23 OS=Arabidopsis thaliana OX=3702 GN=XTH23 PE=2 SV=1	Carbohydrate transport and metabolism	Probable xyloglucan endotransglucosylase/hydrolase protein 23 [Fragaria vesca subsp. vesca]
									XTH23.2	maker-Fvb1-2-augustus-gene-179.46	-	17942601	17944663	5'_59875	Carbohydrate transport and metabolism	K14504	--	Glycosyl hydrolases family 16	Probable xyloglucan endotransglucosylase/hydrolase protein 23 OS=Arabidopsis thaliana OX=3702 GN=XTH23 PE=2 SV=1	Carbohydrate transport and metabolism	Probable xyloglucan endotransglucosylase/hydrolase protein 23 [Fragaria vesca subsp. vesca]
									XTH25	maker-Fvb1-2-snap-gene-179.60	-	17944702	17959846	5'_44692	Carbohydrate transport and metabolism	K14504	--	Glycosyl hydrolases family 16	Probable xyloglucan endotransglucosylase/hydrolase protein 25 OS=Arabidopsis thaliana OX=3702 GN=XTH25 PE=2 SV=2	Carbohydrate transport and metabolism	Probable xyloglucan endotransglucosylase/hydrolase protein 25 [Fragaria vesca subsp. vesca]
Fvb1-2	23412832	8.02068e-06	5.1	9.04145e-05	4.04376	C/T	C:84_T:10	0.11
Fvb2-1	4385421	4.39008e-08	7.36	1.13636e-06	5.94	G/A	G:103_A:17	0.14	LAC11	augustus_masked-Fvb2-1-processed-gene-44.3	-	4414688	4427065	3'_29267	--	K05909	Secondary metabolites biosynthesis, transport and catabolism	Multicopper oxidase	Laccase-11 OS=Arabidopsis thaliana OX=3702 GN=LAC11 PE=2 SV=1	Secondary metabolites biosynthesis, transport and catabolism	Laccase-11-like [Fragaria vesca subsp. vesca]
									EGases7	maker-Fvb2-1-augustus-gene-44.18	-	4428550	4432709	3'_43129	--	K19891	--	Glycosyl hydrolases family 17	Glucan endo-1,3-beta-glucosidase 7 OS=Arabidopsis thaliana OX=3702 GN=At4g34480 PE=1 SV=2	Carbohydrate transport and metabolism	Glucan endo-1,3-beta-D-glucosidase [Fragaria vesca subsp. vesca]
Fvb2-2	7149029	6.40494e-06	5.19	9.94984e-06	5	C/T	C:62_T:14	0.18	SCPL	augustus_masked-Fvb2-2-processed-gene-72.16	-	7215456	7215689	3'_66427	--	K09645	--	Serine carboxypeptidase	--	Posttranslational modification, protein turnover, chaperones	Putative carboxypeptidase C [Rosa chinensis]
									SCL1	maker-Fvb2-2-augustus-gene-72.51	+	7206080	7207966	5'_57051	--	K14494	--	GRAS domain family	Protein SCARECROW OS=Arabidopsis thaliana OX=3702 GN=SCR PE=1 SV=1	Transcription	Protein SCARECROW-like [Fragaria vesca subsp. vesca]
Fvb2-2	10511642	7.86762e-06	5.1	1.48139e-05	4.82933	G/T	G:140_T:10	0.07	ERF027.1	snap_masked-Fvb2-2-processed-gene-104.27	-	10423605	10424377	5'_87265	--	--	--	--	Ethylene-responsive transcription factor ERF027 OS=Arabidopsis thaliana OX=3702 GN=ERF027 PE=2 SV=1	Transcription	Transcription factor ERF17 [Fragaria x ananassa]
									ERF027.2	snap_masked-Fvb2-2-processed-gene-104.28	-	10424439	10424630	5'_87012	--	--	--	--	Ethylene-responsive transcription factor ERF027 OS=Arabidopsis thaliana OX=3702 GN=ERF027 PE=2 SV=1	Transcription	Transcription factor ERF17 [Fragaria x ananassa]
									ERF027.3	snap_masked-Fvb2-2-processed-gene-104.31	-	10432859	10434016	5'_77626	--	K09286	--	AP2 domain	Ethylene-responsive transcription factor ERF027 OS=Arabidopsis thaliana OX=3702 GN=ERF027 PE=2 SV=1	Transcription	Transcription factor ERF17 [Fragaria x ananassa]
Fvb2-3	9747657	8.72142e-05	4.05941	3.35743e-06	5.47	A/G	A:94_G:32	0.25
Fvb2-3	13431041	9.53401e-07	6.02	0.000308168	3.51121	T/C	T:81_C:9	0.1	PME58.2	maker-Fvb2-3-augustus-gene-134.22	+	13451424	13454868	5'_20383	--	K01051	--	Myb/SANT-like DNA-binding domain	Probable pectinesterase/pectinesterase inhibitor 58	Transcription	Probable pectinesterase/pectinesterase inhibitor 58
									PME58.3	maker-Fvb2-3-augustus-gene-135.22	-	13511499	13514054	3'_80458	--	K01051	--	Myb/SANT-like DNA-binding domain	Probable pectinesterase/pectinesterase inhibitor 58	Transcription	Probable pectinesterase/pectinesterase inhibitor 58
Fvb2-3	13431068	3.3718e-06	5.47	0.000361919	3.44139	C/T	C:84_T:8	0.09
Fvb2-3	13431104	1.79839e-06	5.75	0.000257754	3.5888	A/C	A:86_C:8	0.09
Fvb2-3	15797190	5.36045e-06	5.27	3.58773e-05	4.44518	C/T	C:111_T:25	0.18
Fvb2-3	19070229	0.000732773	3.13503	8.10971e-06	5.09
Fvb2-4	14441185	2.48434e-09	8.6	8.6199e-06	5.06	T/A	T:114_A:8	0.07	XTH2.1	maker-Fvb2-4-snap-gene-145.78	-	14529375	14532668	3'_88190	--	K08235	--	Glycosyl hydrolases family 16	Xyloglucan endotransglucosylase/hydrolase protein 2 OS=Arabidopsis thaliana OX=3702 GN=XTH2 PE=2 SV=1	Carbohydrate transport and metabolism	Xyloglucan endotransglucosylase/hydrolase protein 2-like [Fragaria vesca subsp. vesca]
									XTH2.2	maker-Fvb2-4-snap-gene-145.79	-	14532981	14536750	3'_91796	--	K08235	--	Glycosyl hydrolases family 16	Xyloglucan endotransglucosylase/hydrolase protein 2 OS=Arabidopsis thaliana OX=3702 GN=XTH2 PE=2 SV=1	Carbohydrate transport and metabolism	Xyloglucan endotransglucosylase/hydrolase protein 2-like [Fragaria vesca subsp. vesca]
									NAC053	augustus_masked-Fvb2-4-processed-gene-145.11	-	14506338	14507651	3'_65153	--	--	--	No apical meristem (NAM) protein	NAC domain-containing protein 53 OS=Arabidopsis thaliana OX=3702 GN=NAC053 PE=2 SV=1	Transcription	NAC domain-containing protein 7-like [Fragaria vesca subsp. vesca]
Fvb2-4	15390078	9.47642e-06	5.02	0.000235486	3.62804	C/G	C:98_G:38	0.28
Fvb3-1	3588942	7.40304e-06	5.13	0.000123076	3.90983	C/T	C:140_T:8	0.05	XYN5	augustus_masked-Fvb3-1-processed-gene-35.10	-	3540323	3542080	5'_46862	Carbohydrate transport and metabolism	K01181	--	Glycosyl hydrolase family 10	Endo-1,4-beta-xylanase 5 OS=Arabidopsis thaliana OX=3702 GN=XYN5 PE=3 SV=1	Carbohydrate transport and metabolism	endo-1,4-beta-xylanase D-like [Fragaria vesca subsp. vesca]
									WRKY24	maker-Fvb3-1-augustus-gene-36.35	+	3659166	3662726	5'_70224	--	K13424	--	WRKY DNA -binding domain	WRKY transcription factor WRKY24 OS=Oryza sativa subsp. indica OX=39946 GN=WRKY24 PE=2 SV=1	Transcription	Probable WRKY transcription factor 25 [Fragaria vesca subsp. vesca]
Fvb3-2	12610091	8.87669e-06	5.05	0.000458878	3.3383	C/A	C:73_A:5	0.06
Fvb3-3	27198207	3.57884e-07	6.45	9.1284e-06	5.04	T/G	T:144_G:8	0.05	PG1	augustus_masked-Fvb3-3-processed-gene-271.1	+	27112638	27113993	3'_84214	Carbohydrate transport and metabolism	K01213	--	Glycosyl hydrolases family 28	Polygalacturonase OS=Nicotiana tabacum OX=4097 GN=PG1 PE=2 SV=1	Carbohydrate transport and metabolism	Polygalacturonase-like [Fragaria vesca subsp. vesca]
Fvb3-4	3572024	8.04969e-07	6.09	2.30173e-05	4.63795	C/A	C:104_A:10	0.09	β-Gal	augustus_masked-Fvb3-4-processed-gene-35.20	-	3583600	3587932	3'_11576	Carbohydrate transport and metabolism	K06617	--	Raffinose synthase or seed imbibition protein Sip1	Probable galactinol--sucrose galactosyltransferase 1 OS=Arabidopsis thaliana OX=3702 GN=RFS1 PE=2 SV=1	Function unknown	Probable galactinol--sucrose galactosyltransferase 1 [Fragaria vesca subsp. vesca]
Fvb3-4	3572025	8.04969e-07	6.09	2.30173e-05	4.63795	T/A	T:104_A:10	0.09	GATL3	snap_masked-Fvb3-4-processed-gene-36.16	+	3592133	3593310	5'_20108	--	K20893	--	--	Probable galacturonosyltransferase-like 3 OS=Arabidopsis thaliana OX=3702 GN=GATL3 PE=2 SV=1	Carbohydrate transport and metabolism	Probable galacturonosyltransferase-like 3 [Malus domestica]
Fvb3-4	3578827	9.21971e-06	5.04	0.000192762	3.71498	G/A	G:112_A:10	0.08
Fvb3-4	3634676	3.16378e-06	5.5	0.000133137	3.8757	T/C	T:77_C:9	0.1
Fvb3-4	3634707	3.16378e-06	5.5	0.000133137	3.8757	T/A	T:77_A:9	0.1
Fvb3-4	3634730	2.87672e-06	5.54	0.000108057	3.96635	C/T	C:75_T:9	0.11
Fvb3-4	3634754	3.16378e-06	5.5	0.000133137	3.8757	C/T	C:77_T:9	0.1
Fvb3-4	3700667	7.44555e-07	6.13	1.51921e-05	4.81838	G/C	G:113_C:9	0.07
Fvb3-4	3700718	7.44555e-07	6.13	1.51921e-05	4.81838	C/T	C:113_T:9	0.07	EXPA8	maker-Fvb3-4-augustus-gene-38.55	+	3784610	3786035	5'_83892	--	K20628	--	Expansin C-terminal domain	Expansin-A8 OS=Arabidopsis thaliana OX=3702 GN=EXPA8 PE=2 SV=1	Function unknown	Expansin-A4-like [Fragaria vesca subsp. vesca]
Fvb3-4	7970465	9.12124e-06	5.04	0.000207207	3.6836	A/G	A:13_G:133	0.09
Fvb3-4	8026946	3.63348e-08	7.44	2.66537e-06	5.57	T/C	T:13_C:93	0.12
Fvb3-4	8027027	5.50187e-06	5.26	6.14371e-05	4.21157	T/C	T:17_C:89	0.16
Fvb3-4	8027097	3.39743e-08	7.47	3.14747e-06	5.5	T/C	T:13_C:91	0.12
Fvb3-4	8197583	4.98559e-06	5.3	0.000110756	3.95563	A/C	A:13_C:139	0.09	PL	maker-Fvb3-4-snap-gene-82.58	-	8196480	8198551	--	--	K21596	--	F-box associated	F-box/kelch-repeat protein At3g06240 OS=Arabidopsis thaliana OX=3702 GN=At3g06240 PE=2 SV=1	Function unknown	F-box/kelch-repeat protein At3g06240-like [Fragaria vesca subsp. vesca]
Fvb3-4	12707968	5.67692e-06	5.25	0.000118674	3.92564	A/T	A:75_T:13	0.15
Fvb3-4	13216756	8.47984e-06	5.07	1.96185e-05	4.70733	C/T	C:119_T:17	0.12
Fvb3-4	14061560	2.88465e-05	4.53991	9.43424e-06	5.03	G/A	G:129_A:23	0.15
Fvb4-1	11369525	9.56803e-06	5.02	5.77023e-05	4.23881	A/G	A:68_G:80	0.46
Fvb4-1	11953938	4.92661e-06	5.31	0.00011009	3.95825	G/A	G:119_A:7	0.06	MPK16.1	maker-Fvb4-1-augustus-gene-120.12	+	12039631	12045503	5'_85693	Cell wall/membrane/envelope biogenesis	K04371	Signal transduction mechanisms	Protein kinase domain	Mitogen-activated protein kinase 16 OS=Arabidopsis thaliana OX=3702 GN=MPK16 PE=2 SV=2	Signal transduction mechanisms	Mitogen-activated protein kinase 16 [Fragaria vesca subsp. vesca]
Fvb4-4	12039244	5.9996e-06	5.22	2.70611e-05	4.56766	T/C	T:32_C:82	0.28	MPK16.2	maker-Fvb4-4-augustus-gene-120.14	-	12025133	12031185	5'_8059	Cell wall/membrane/envelope biogenesis	K04371	Signal transduction mechanisms	Protein kinase domain	Mitogen-activated protein kinase 16 OS=Arabidopsis thaliana OX=3702 GN=MPK16 PE=2 SV=2	Signal transduction mechanisms	Mitogen-activated protein kinase 16 [Fragaria vesca subsp. vesca]
Fvb5-1	860908	8.56029e-06	5.07	3.34858e-05	4.47514	G/A	G:90_A:38	0.3	SPX	maker-Fvb5-1-augustus-gene-8.36	-	824930	832406	5'_28502	Carbohydrate transport and metabolism	--	General function prediction only	Major Facilitator Superfamily	SPX domain-containing membrane protein At4g22990 OS=Arabidopsis thaliana OX=3702 GN=At4g22990 PE=2 SV=2	Inorganic ion transport and metabolism	SPX domain-containing membrane protein At4g11810-like [Fragaria vesca subsp. vesca]
									P2A12	maker-Fvb5-1-augustus-gene-9.51	-	932081	934959	3'_71173	--	K20783	--	Phloem protein 2	F-box protein PP2-A12 OS=Arabidopsis thaliana OX=3702 GN=P2A12 PE=2 SV=1	Function unknown	F-box protein PP2-A12-like [Fragaria vesca subsp. vesca]
									STP1	maker-Fvb5-1-snap-gene-9.54	+	897196	905188	5'_36288	Carbohydrate transport and metabolism	K24193	General function prediction only	Sugar (and other) transporter	Sugar transport protein 1 OS=Arabidopsis thaliana OX=3702 GN=STP1 PE=1 SV=2	Intracellular trafficking, secretion, and vesicular transport	Sugar transport protein 12-like [Fragaria vesca subsp. vesca]
									SCL28	snap_masked-Fvb5-1-processed-gene-9.35	-	941033	942994	3'_80125	--	K14494	--	GRAS domain family	Scarecrow-like protein 28 OS=Arabidopsis thaliana OX=3702 GN=SCL28 PE=1 SV=1	Transcription	Scarecrow-like protein 28 [Fragaria vesca subsp. vesca]
Fvb6-3	25230256	4.63534e-06	5.33	0.00015956	3.79708	C/T	C:105_T:13	0.11
Fvb6-3	25230296	4.78147e-06	5.32	0.000200675	3.69751	T/G	T:109_G:13	0.11
Fvb6-3	25860172	1.52141e-06	5.82	3.23832e-05	4.48968	C/T	C:91_T:13	0.12	NAC090.1	augustus_masked-Fvb6-3-processed-gene-259.5	-	25905212	25905625	3'_45040	--	--	--	--	--	Transcription	NAC domain-containing protein 90-like [Fragaria vesca subsp. vesca]
									NAC090.2	maker-Fvb6-3-augustus-gene-258.18	-	25882733	25885006	3'_22561	--	K00521	--	No apical meristem (NAM) protein	NAC domain-containing protein 90 OS=Arabidopsis thaliana OX=3702 GN=NAC090 PE=1 SV=1	Transcription	NAC domain-containing protein 90-like [Fragaria vesca subsp. vesca]
Fvb6-4	12429830	3.42381e-06	5.47	8.18741e-05	4.08685	A/T	A:17_T:95	0.15	PP2A15	maker-Fvb6-4-augustus-gene-123.44	-	12360106	12364122	5'_65708	--	--	--	Phloem protein 2	F-box protein PP2-A15 OS=Arabidopsis thaliana OX=3702 GN=PP2A15 PE=2 SV=1	Function unknown	F-box protein PP2-A15 [Fragaria vesca subsp. vesca]
Fvb7-1	12821215	5.16024e-06	5.29	0.000587949	3.23066	A/G	A:95_G:5	0.05
Fvb7-1	19451770	5.04136e-06	5.3	1.12878e-05	4.94739	A/C	A:92_C:10	0.1	aCHIT	maker-Fvb7-1-snap-gene-193.55	+	19353490	19353907	3'_97863	--	K01183	Cell wall/membrane/envelope biogenesis	Glycosyl hydrolases family 18	Acidic endochitinase OS=Cicer arietinum OX=3827 PE=2 SV=1	Carbohydrate transport and metabolism	Hevamine-A-like [Fragaria vesca subsp. vesca]
									bCHIT	maker-Fvb7-1-snap-gene-194.42	-	19447675	19449745	5'_2025	--	K01183	Cell wall/membrane/envelope biogenesis	Glycosyl hydrolases family 18	Basic endochitinase OS=Nicotiana tabacum OX=4097 PE=2 SV=1	Carbohydrate transport and metabolism	Basic endochitinase-like [Fragaria vesca subsp. vesca]
Fvb7-1	19451988	6.75096e-06	5.17	1.79776e-05	4.74527	C/T	C:90_T:10	0.1
Fvb7-4	9465329	9.89853e-06	5	0.000296878	3.52742	T/G	T:8_G:96	0.08
