# Supplementary material
Source: Research Square preprint supplement (doi:10.21203/rs.3.rs-9795398/v1)
Supplement: Supplementary file 4 [file b450d79a0037c8009b46adb7.xlsx]

## Sheet: Sheet1
Table S1. The sequenced information of 76 strawberry germplasm resources used in this study
Full Name	Sample ID	Species	Geographical origin	Total Reads	GC Percentage(%)	Q30 Percentage(%)	Clean reads	Mapping rate (%)	SLAF number	Total depth	Average depth
111CV	111	Fragaria × ananassa	America	2200115	40.96	94.54	4517841	84.95	150417	1349435	8.97
130CV	130	Fragaria × ananassa	America	2118979	41.54	93.17	4352085	82.99	145214	1232821	8.49
131CV	131	Fragaria × ananassa	America	2018689	41.29	93.75	4155134	84.55	145556	1188689	8.17
Third Princess	3GZ	Fragaria × ananassa	China	2401806	39.83	94.78	4944861	85	135890	1546528	11.38
Albion	AEF	Fragaria × ananassa	America	2843849	40.96	95.43	5821272	84.21	155069	1822077	11.75
Baojiazaosheng	BaoJ	Fragaria × ananassa	Japan	2193104	42.14	94.48	4496358	83.72	109085	1405123	12.88
Baicaomei No.1	BCM1H	Fragaria × ananassa	China	2501727	40.08	94.68	5156311	83.62	149271	1561183	10.46
BF3	BF3	Fragaria × ananassa	America	3174208	42.01	94.87	6505226	84.14	119088	2083738	17.5
Portola	BoTL	Fragaria × ananassa	America	2412177	43.07	94.77	4927884	82.4	108330	1536488	14.18
BuRPEE	BuRPEE	Fragaria × ananassa	Canada	2527869	42.19	94.49	5172313	82.68	111842	1585446	14.18
Snow White	BXGZ	Fragaria × ananassa	China	2328327	40.49	94.26	4785412	83.67	139139	1483321	10.66
Baixuexiaoding	BXXD	Fragaria × ananassa	Japan	1950598	40.42	93.88	4004739	85.18	133249	1299792	9.75
DanXue	DanXue	Fragaria × ananassa	Japan	4278216	40.27	95.55	8809437	85.97	183844	2689377	14.63
Danmei No.2	DM2H	Fragaria × ananassa	China	3304540	40.5	95.47	6815500	85.92	186305	2078374	11.16
Darselect	DS	Fragaria × ananassa	France	3906512	39.74	95.05	8021343	85.74	156086	2618716	16.78
DianXue	DX	Fragaria × ananassa	Japan	2326442	40.83	94.65	4780625	83.4	141892	1465301	10.33
Fenhonggongzhu	FG8	Fragaria × ananassa	China	2512499	39.99	93.8	5160565	86.16	136629	1715550	12.56
Fenhongjiaren	FHJR	Fragaria × ananassa	China	3016787	40.04	94.58	6216895	84.97	156657	1920313	12.26
Pink Beauty	FJR	Fragaria × ananassa	China	1912155	40	93.81	3929596	84.82	134000	1259926	9.4
Fujiliya	FuJLY	Fragaria × ananassa	Spain	2317004	42.7	95.44	4730398	78.29	79381	338764	4.27
Toyonoka	FX	Fragaria × ananassa	Japan	2071552	40.26	94.25	4258093	84.32	123773	1352077	10.92
Fuzhou	FZH	Fragaria virginiana	America	2506806	41.63	94.07	5161475	82.92	152718	1410870	9.24
Gang No.3	G3H	Fragaria × ananassa	America	2685953	40.76	95.94	5552155	84.54	163447	1631444	9.98
Ganlu	GL	Fragaria × ananassa	China	2299480	40.32	94.19	4730302	85.84	142464	1523938	10.7
Kinuama	GNG	Fragaria × ananassa	Japan	2628508	40.12	94.87	5403796	84.82	144778	1723629	11.91
Benihoppe	H	Fragaria × ananassa	Japan	2151392	40.07	93.36	4417168	85.37	133057	1437091	10.8
Honeoye	HN	Fragaria × ananassa	America	1956308	40.12	94.79	4021416	85.75	134122	1287762	9.6
Hongyu	HY	Fragaria × ananassa	China	2247922	40.55	94.31	4609456	85.01	136557	1506210	11.03
Jingyao	J	Fragaria × ananassa	China	2104966	40.65	93.59	4323279	85.17	130216	1398623	10.74
Jingliuxiang	JlX	Fragaria × ananassa	China	2159628	40.05	94.33	4429752	85.98	142223	1469051	10.33
Jingningxiang	JNX	Fragaria × ananassa	China	3122776	40.24	94.73	6412961	85.69	168698	2073718	12.29
Jingquanxiang	JQX	Fragaria × ananassa	China	2201735	40.57	94.92	4523836	83.96	140932	1415968	10.05
Jingshuo	JS	Fragaria × ananassa	China	2364108	40.27	94.51	4860967	84.74	148325	1531592	10.33
Jiutianhongyun	JTHY	Fragaria × ananassa	China	2096508	40.76	94.38	4308011	85.35	128486	1393136	10.84
Jingtaoxiang	JTX	Fragaria × ananassa	China	2083953	40.03	94.14	4282701	86.01	141712	1392490	9.83
Jingyixiang	JYX	Fragaria × ananassa	China	2622910	40.22	94.4	5395850	85.01	154921	1696750	10.95
Jingzangxiang	JZH	Fragaria × ananassa	China	2143417	40.63	94.34	4391772	85.08	131133	1445945	11.03
Kart	KET	Fragaria × ananassa	Spain	2631411	40.66	93.56	5406869	83.91	167311	1674345	10.01
Camorosa	KMLSH	Fragaria × ananassa	America	2863968	40.5	95.76	5910149	85.61	161860	1786787	11.04
Tochiotome	LiYL	Fragaria × ananassa	Japan	2487884	42.24	94.79	5094353	83.31	107173	1595369	14.89
Riva	LW	Fragaria × ananassa	Netherlands	1873365	40.47	94	3847266	85.73	130612	1255409	9.61
Miaoxiang No.3	M3	Fragaria × ananassa	China	14862109	39.93	96.13	30629838	86.54	191618	9588284	50.04
Miaoxiang No.7	M7	Fragaria × ananassa	China	4097996	40.78	95.85	8436391	83.59	173241	2501216	14.44
Honai	Mei13	Fragaria × ananassa	America	1500574	43.03	94.71	3069928	82.49	101716	904497	8.89
Monterey	MTR	Fragaria × ananassa	America	3504277	40.74	95.84	7213434	84.25	164758	2187011	13.27
Ningfeng	NF	Fragaria × ananassa	China	1545770	41.23	94.31	3173255	82.75	132274	959145	7.25
Ningyu	NY	Fragaria × ananassa	China	1889544	40.65	93.59	3882746	83.75	133584	1211529	9.07
Pajaro	PTL	Fragaria × ananassa	America	2115544	40.71	94.25	4339024	85.24	131643	1420150	10.79
Pretty Beauty	QJR	Fragaria × ananassa	China	1847966	40.78	94.15	3798573	84.57	133203	1204217	9.04
Qianmei No.1	QM1H	Fragaria × ananassa	China	2160058	40.28	93.45	4438326	84.44	128200	1412663	11.02
Qianmei No.2	QM2H	Fragaria × ananassa	China	3676961	40.71	95.96	7617095	86.35	184868	2246958	12.15
Allstar	QMX	Fragaria × ananassa	America	2293683	40.17	94.7	4709576	85.13	141294	1522389	10.77
Ssanta	SDH	Fragaria × ananassa	Korea	2137070	40.69	93.77	4394882	85.39	133158	1411407	10.6
Senga Sengana	SGL	Fragaria × ananassa	Germany	2360914	40.26	94.77	4852431	85.24	145484	1556369	10.7
San Andreas	SHA	Fragaria × ananassa	America	2357266	40.5	95.95	4850645	84.68	147557	1491590	10.11
Shengxue	SHX	Fragaria × ananassa	Japan	3551697	40.2	95.58	7308202	86.14	162196	2275835	14.03
Shuoli	SL	Fragaria × ananassa	China	2299388	41.27	94.08	4711064	84.17	136569	1525884	11.17
Kaorino	SZ	Fragaria × ananassa	Japan	2013946	40.19	94.44	4137011	85.07	128615	1336365	10.39
Toukun	TaoX	Fragaria × ananassa	Japan	2436974	42.43	94.81	4999309	82.65	111387	1510547	13.56
Tianbao	TB	Fragaria × ananassa	China	2123446	40.73	94.21	4358175	85.22	132583	1421792	10.72
Sweet Charlie	TCHL	Fragaria × ananassa	America	1786858	41.08	93.75	3674623	84.66	135583	1045946	7.71
Tudla	TDL	Fragaria × ananassa	Spain	3183736	40.56	95.98	6558986	84.58	160403	1988099	12.39
Tianxiang	TianX	Fragaria × ananassa	China	2005623	39.74	94.38	4129068	84.99	131053	1300849	9.93
Taikong No.1	TK1H	Fragaria × ananassa	China	2671308	41.18	95.51	5490960	85.19	161969	1611839	9.95
Taikong No.8	TK8H	Fragaria × ananassa	China	2261908	41.58	96.05	4654861	82.81	159312	1276127	8.01
Tenira	TNL	Fragaria × ananassa	America	1918108	40.41	94.48	3943156	85.52	142762	1265537	8.86
Veestar	WSTE	Fragaria × ananassa	Canada	2367844	40.15	94.44	4868769	85.92	142824	1569816	10.99
Xiaobai	XB	Fragaria × ananassa	China	2076793	40.28	94.4	4264907	85.01	138508	1379243	9.96
Xiuli	XL	Fragaria × ananassa	China	2621008	39.97	94.59	5387023	85.06	146618	1721732	11.74
Xuelixiang	XLX	Fragaria × ananassa	Korea	2280461	39.77	94.85	4689047	85.9	137068	1515888	11.06
Sachinoka	XX	Fragaria × ananassa	Japan	2329843	40.09	94.86	4784773	84.93	141684	1531973	10.81
Yanli	YanL	Fragaria × ananassa	Japan	2246899	41.05	94.18	4599477	84.24	135942	1504837	11.07
Jingyu	Yu	Fragaria × ananassa	China	2535063	40.46	94.43	5202969	85.27	143728	1690139	11.76
Yuexiu	YX	Fragaria × ananassa	China	2796023	42.09	94.82	5745685	83.66	173880	1623200	9.34
Sagahonoka	ZH	Fragaria × ananassa	Japan	1508314	40.67	93.47	3099176	83.63	123101	962067	7.82
Akihime	ZJ	Fragaria × ananassa	Japan	3063023	40.32	94.36	6307643	84.74	158155	1967037	12.44
