# Supplementary material
Source: Research Square preprint supplement (doi:10.21203/rs.3.rs-9795398/v1)
Supplement: Supplementary file 5 [file bb9cd50055c2244b01270efb.xlsx]

## Sheet: Sheet1
Table S2. Selective sweeps and genes in these selective regions between Western strawberries and Asian strawberries
Chromosome	Region start(bp)	Region end(bp)	Region length(bp)	Gene Num	Fst value	Pi ratio	Gene ID	Start	End	Strand	COG class annotation	GO annotation	KEGG annotation	KOG class annotation	Pfam annotation	Swissprot annotation	TrEMBL annotation	eggNOG class annotation	Nr annotation	Referrence
Fvb1-2	1770001	1890000	119999	29	0.296677	3.54538
							augustus_masked-Fvb1-2-processed-gene-18.0	1794168	1795685	+	--	--	--	--	Protein of unknown function (DUF295)	--	F-box family protein with DUF295 OS=Prunus dulcis OX=3755 GN=Prudu_011465 PE=4 SV=1	--	uncharacterized protein LOC105351628 [Fragaria vesca subsp. vesca]
							augustus_masked-Fvb1-2-processed-gene-18.1	1796845	1797561	+	--	--	--	--	Protein of unknown function (DUF295)	--	DUF295 domain-containing protein OS=Prunus persica OX=3760 GN=PRUPE_3G068500 PE=4 SV=1	--	uncharacterized protein LOC105351628 [Fragaria vesca subsp. vesca]
							augustus_masked-Fvb1-2-processed-gene-18.10	1883425	1884567	+	--	--	--	--	Protein of unknown function (DUF295)	--	DUF295 domain-containing protein OS=Prunus persica OX=3760 GN=PRUPE_3G068500 PE=4 SV=1	Function unknown	F-box protein At4g35733-like [Fragaria vesca subsp. vesca]
							augustus_masked-Fvb1-2-processed-gene-18.14	1837301	1838687	-	--	Molecular Function: protein binding (GO:0005515);	K04079	--	F-box domain	F-box/kelch-repeat protein At3g23880 OS=Arabidopsis thaliana OX=3702 GN=At3g23880 PE=2 SV=1	Putative F-box domain-containing protein OS=Rosa chinensis OX=74649 GN=RchiOBHm_Chr2g0092791 PE=4 SV=1	--	F-box/kelch-repeat protein At3g06240-like [Fragaria vesca subsp. vesca]
							maker-Fvb1-2-augustus-gene-17.11	1766033	1771242	+	Translation, ribosomal structure and biogenesis	Molecular Function: translation elongation factor activity (GO:0003746);; Cellular Component: mitochondrion (GO:0005739);	K02357	Translation, ribosomal structure and biogenesis	Elongation factor TS	Polyprotein of EF-Ts, chloroplastic OS=Arabidopsis thaliana OX=3702 GN=PETs PE=1 SV=1	Elongation factor Ts, mitochondrial OS=Rosa chinensis OX=74649 GN=EFTS PE=3 SV=1	Translation, ribosomal structure and biogenesis	uncharacterized protein LOC101312281 [Fragaria vesca subsp. vesca]
							maker-Fvb1-2-augustus-gene-17.15	1771639	1773615	-	General function prediction only	Molecular Function: nucleic acid binding (GO:0003676);; Molecular Function: methyltransferase activity (GO:0008168);; Biological Process: methylation (GO:0032259);	K07579	Translation, ribosomal structure and biogenesis	Methyltransferase small domain	--	Putative methyltransferase small domain, S-adenosyl-L-methionine-dependent methyltransferase OS=Rosa chinensis OX=74649 GN=RchiOBHm_Chr2g0091271 PE=4 SV=1	Translation, ribosomal structure and biogenesis	methyltransferase-like protein 5 [Fragaria vesca subsp. vesca]
							maker-Fvb1-2-augustus-gene-17.16	1774740	1778375	-	--	Cellular Component: nucleus (GO:0005634);; Biological Process: regulation of transcription, DNA-templated (GO:0006355);; Biological Process: auxin-activated signaling pathway (GO:0009734);	K14484	--	AUX/IAA family	Auxin-responsive protein IAA27 OS=Arabidopsis thaliana OX=3702 GN=IAA27 PE=1 SV=1	Auxin-responsive protein OS=Rosa chinensis OX=74649 GN=RchiOBHm_Chr2g0091261 PE=3 SV=1	Transcription	auxin-responsive protein IAA27 [Fragaria vesca subsp. vesca]
							maker-Fvb1-2-augustus-gene-18.49	1803581	1810505	+	--	Molecular Function: ubiquitin-protein transferase activity (GO:0004842);; Molecular Function: transferase activity, transferring acyl groups (GO:0016746);; Molecular Function: ligase activity (GO:0016874);	K17592	--	U-box domain	Putative E3 ubiquitin-protein ligase LIN-1 OS=Lotus japonicus OX=34305 GN=CERBERUS PE=2 SV=2	RING-type E3 ubiquitin transferase OS=Rosa chinensis OX=74649 GN=RchiOBHm_Chr2g0091211 PE=4 SV=1	Function unknown	putative E3 ubiquitin-protein ligase LIN isoform X1 [Fragaria vesca subsp. vesca]
							maker-Fvb1-2-augustus-gene-18.50	1814598	1816513	+	Posttranslational modification, protein turnover, chaperones	Molecular Function: peroxidase activity (GO:0004601);; Biological Process: cell redox homeostasis (GO:0045454);; Molecular Function: peroxiredoxin activity (GO:0051920);	K24140	Posttranslational modification, protein turnover, chaperones	Redoxin	Peroxiredoxin-2 OS=Populus trichocarpa OX=3694 PE=1 SV=1	Glutaredoxin-dependent peroxiredoxin OS=Rosa chinensis OX=74649 GN=RchiOBHm_Chr2g0091161 PE=3 SV=1	Posttranslational modification, protein turnover, chaperones	peroxiredoxin-2B [Fragaria vesca subsp. vesca]
							maker-Fvb1-2-augustus-gene-18.52	1824936	1826883	+	Signal transduction mechanisms	Molecular Function: protein serine/threonine kinase activity (GO:0004674);; Molecular Function: ATP binding (GO:0005524);	K02202	General function prediction only	Protein kinase domain	Cyclin-dependent kinase F-1 OS=Arabidopsis thaliana OX=3702 GN=CDKF-1 PE=1 SV=1	Protein kinase domain-containing protein OS=Rosa chinensis OX=74649 GN=RchiOBHm_Chr2g0091141 PE=3 SV=1	Signal transduction mechanisms	cyclin-dependent kinase F-1 [Fragaria vesca subsp. vesca]
							maker-Fvb1-2-augustus-gene-18.53	1873184	1876469	+	Nucleotide transport and metabolism	Molecular Function: thiamine diphosphokinase activity (GO:0004788);; Molecular Function: kinase activity (GO:0016301);; Molecular Function: hydrolase activity (GO:0016787);	K00939	Nucleotide transport and metabolism	Domain of unknown function (DUF4743)	Nudix hydrolase 20, chloroplastic OS=Arabidopsis thaliana OX=3702 GN=NUDT20 PE=2 SV=1	Putative thiamine diphosphokinase OS=Rosa chinensis OX=74649 GN=RchiOBHm_Chr2g0091041 PE=4 SV=1	Nucleotide transport and metabolism	nudix hydrolase 20, chloroplastic-like [Fragaria vesca subsp. vesca]
							maker-Fvb1-2-augustus-gene-18.58	1828398	1831999	-	--	--	--	Energy production and conversion	--	--	Uncharacterized protein OS=Rosa chinensis OX=74649 GN=RchiOBHm_Chr2g0091121 PE=4 SV=1	--	S-antigen protein-like [Fragaria vesca subsp. vesca]
							maker-Fvb1-2-augustus-gene-18.59	1833835	1836666	-	--	--	--	--	Plant protein of unknown function (DUF936)	--	Uncharacterized protein OS=Rosa chinensis OX=74649 GN=RchiOBHm_Chr2g0091101 PE=4 SV=1	Function unknown	uncharacterized protein LOC101301592 [Fragaria vesca subsp. vesca]
							maker-Fvb1-2-augustus-gene-18.60	1856328	1858488	-	Carbohydrate transport and metabolism	Biological Process: carbohydrate metabolic process (GO:0005975);; Molecular Function: glucan endo-1,3-beta-D-glucosidase activity (GO:0042973);	K15429	--	Glycosyl hydrolases family 17	Glucan endo-1,3-beta-glucosidase 8 OS=Arabidopsis thaliana OX=3702 GN=At1g64760 PE=2 SV=2	(1->3)-beta-glucan endohydrolase OS=Rosa chinensis OX=74649 GN=RchiOBHm_Chr2g0091081 PE=3 SV=1	Carbohydrate transport and metabolism	glucan endo-1,3-beta-glucosidase 8 [Fragaria vesca subsp. vesca]
							maker-Fvb1-2-augustus-gene-18.61	1859289	1863286	-	Translation, ribosomal structure and biogenesis	Cellular Component: nucleus (GO:0005634);; Cellular Component: mitochondrial matrix (GO:0005759);; Molecular Function: tRNA (guanine(37)-N(1))-methyltransferase activity (GO:0052906);	K15429	RNA processing and modification	Met-10+ like-protein	tRNA (guanine(37)-N1)-methyltransferase 2 OS=Vitis vinifera OX=29760 GN=VIT_11s0016g04350 PE=3 SV=1	tRNA (guanine(37)-N1)-methyltransferase OS=Rosa chinensis OX=74649 GN=RchiOBHm_Chr2g0091071 PE=3 SV=1	RNA processing and modification	tRNA (guanine(37)-N1)-methyltransferase 2 [Fragaria vesca subsp. vesca]
							maker-Fvb1-2-augustus-gene-18.65	1884639	1887600	-	--	Molecular Function: hydrolase activity (GO:0016787);	--	--	alpha/beta hydrolase fold	Strigolactone esterase D14 OS=Arabidopsis thaliana OX=3702 GN=D14 PE=1 SV=1	Putative alpha/Beta hydrolase OS=Rosa chinensis OX=74649 GN=RchiOBHm_Chr2g0091021 PE=4 SV=1	Function unknown	probable strigolactone esterase D14 homolog [Fragaria vesca subsp. vesca]
							maker-Fvb1-2-snap-gene-17.18	1786744	1788590	+	--	Molecular Function: protein binding (GO:0005515);	--	--	F-box domain	--	F-box domain-containing protein OS=Daucus carota subsp. sativus OX=79200 GN=DCAR_017067 PE=4 SV=1	--	F-box/LRR-repeat/kelch-repeat protein At2g27520-like [Fragaria vesca subsp. vesca]
							maker-Fvb1-2-snap-gene-18.67	1801369	1802826	+
							maker-Fvb1-2-snap-gene-18.70	1821061	1824253	+	Transcription	Molecular Function: GTPase activity (GO:0003924);; Molecular Function: GTP binding (GO:0005525);; Biological Process: small GTPase mediated signal transduction (GO:0007264);	K04392	General function prediction only	Ras family	Rac-like GTP-binding protein ARAC7 OS=Arabidopsis thaliana OX=3702 GN=ARAC7 PE=1 SV=1	Putative small GTPase superfamily, P-loop containing nucleoside triphosphate hydrolase OS=Rosa chinensis OX=74649 GN=RchiOBHm_Chr2g0091151 PE=3 SV=1	Function unknown	rac-like GTP-binding protein ARAC7 [Rosa chinensis]
							maker-Fvb1-2-snap-gene-18.75	1784469	1799991	-	--	Cellular Component: mitochondrion (GO:0005739);; Molecular Function: NADPH-adrenodoxin reductase activity (GO:0015039);; Molecular Function: transferase activity (GO:0016740);	K18914	Nucleotide transport and metabolism	--	NADPH:adrenodoxin oxidoreductase, mitochondrial OS=Arabidopsis thaliana OX=3702 GN=MFDR PE=1 SV=1	NADPH:adrenodoxin oxidoreductase, mitochondrial OS=Rosa chinensis OX=74649 GN=RchiOBHm_Chr2g0091251 PE=3 SV=1	Energy production and conversion	NADPH:adrenodoxin oxidoreductase, mitochondrial-like [Fragaria vesca subsp. vesca]
							maker-Fvb1-2-snap-gene-18.76	1813119	1814065	-	--	Molecular Function: thiol-dependent ubiquitinyl hydrolase activity (GO:0036459);	--	--	--	--	Putative ubiquitinyl hydrolase 1 OS=Rosa chinensis OX=74649 GN=RchiOBHm_Chr5g0074421 PE=4 SV=1	Cell cycle control, cell division, chromosome partitioning	ubiquitin carboxyl-terminal hydrolase 12-like [Fragaria vesca subsp. vesca]
							maker-Fvb1-2-snap-gene-18.79	1853250	1854087	-	--	Molecular Function: protein binding (GO:0005515);	--	--	F-box domain	--	Putative F-box domain-containing protein OS=Rosa chinensis OX=74649 GN=RchiOBHm_Chr2g0092791 PE=4 SV=1	Function unknown	F-box/kelch-repeat protein At3g06240-like [Fragaria vesca subsp. vesca]
							maker-Fvb1-2-snap-gene-18.80	1852673	1852999	-	--	--	--	--	--	--	--	Function unknown	F-box/kelch-repeat protein At3g06240-like [Fragaria vesca subsp. vesca]
							maker-Fvb1-2-snap-gene-18.83	1866769	1880394	-	Secondary metabolites biosynthesis, transport and catabolism	Molecular Function: 3-hydroxyisobutyryl-CoA hydrolase activity (GO:0003860);	K05605	Lipid transport and metabolism	Enoyl-CoA hydratase/isomerase	3-hydroxyisobutyryl-CoA hydrolase-like protein 3, mitochondrial OS=Arabidopsis thaliana OX=3702 GN=At4g13360 PE=1 SV=2	Putative 3-hydroxyisobutyryl-CoA hydrolase OS=Rosa chinensis OX=74649 GN=RchiOBHm_Chr2g0091031 PE=3 SV=1	Lipid transport and metabolism	3-hydroxyisobutyryl-CoA hydrolase-like protein 3, mitochondrial isoform X1 [Fragaria vesca subsp. vesca]
							maker-Fvb1-2-snap-gene-18.85	1881007	1881685	-	--	Molecular Function: hydrolase activity (GO:0016787);	--	--	--	--	Putative alpha/Beta hydrolase OS=Rosa chinensis OX=74649 GN=RchiOBHm_Chr2g0091021 PE=4 SV=1	Function unknown	strigolactone esterase D14 [Rosa chinensis]
							snap_masked-Fvb1-2-processed-gene-18.28	1811254	1811466	+	--	Cellular Component: Golgi membrane (GO:0000139);; Molecular Function: structural molecule activity (GO:0005198);; Cellular Component: endoplasmic reticulum (GO:0005783);; Cellular Component: endoplasmic reticulum-Golgi intermediate compartment (GO:0005793);; Cellular Component: Golgi apparatus (GO:0005794);; Biological Process: intracellular protein transport (GO:0006886);; Biological Process: en…	K17267	Intracellular trafficking, secretion, and vesicular transport	--	Coatomer subunit gamma-2 OS=Oryza sativa subsp. japonica OX=39947 GN=Os07g0201100 PE=2 SV=1	Coatomer subunit gamma OS=Medicago truncatula OX=3880 GN=11413931 PE=3 SV=1	Intracellular trafficking, secretion, and vesicular transport	coatomer subunit gamma-like [Fragaria vesca subsp. vesca]
							snap_masked-Fvb1-2-processed-gene-18.29	1811479	1813538	+	--	Cellular Component: Golgi membrane (GO:0000139);; Molecular Function: structural molecule activity (GO:0005198);; Biological Process: intracellular protein transport (GO:0006886);; Biological Process: vesicle-mediated transport (GO:0016192);; Cellular Component: COPI vesicle coat (GO:0030126);	K17267	Intracellular trafficking, secretion, and vesicular transport	Adaptin N terminal region	Coatomer subunit gamma OS=Arabidopsis thaliana OX=3702 GN=At4g34450 PE=1 SV=2	Coatomer subunit gamma OS=Nyssa sinensis OX=561372 GN=F0562_028589 PE=3 SV=1	Intracellular trafficking, secretion, and vesicular transport	coatomer subunit gamma-like [Fragaria vesca subsp. vesca]
							snap_masked-Fvb1-2-processed-gene-18.37	1876523	1876735	+	--	--	--	--	--	--	--	Amino acid transport and metabolism	uncharacterized protein LOC112184366 [Rosa chinensis]
							snap_masked-Fvb1-2-processed-gene-18.42	1851437	1852347	-	--	--	--	--	--	--	--	--	zinc finger CCHC domain-containing protein 9-like [Fragaria vesca subsp. vesca]
Fvb1-3	1	150000	149999	34	0.301135	2.46284
							augustus_masked-Fvb1-3-processed-gene-0.1	6726	8379	+	--	Biological Process: defense response (GO:0006952);; Molecular Function: hydrolase activity (GO:0016787);; Molecular Function: ADP binding (GO:0043531);	--	--	Rx N-terminal domain	--	Putative P-loop containing nucleoside triphosphate hydrolase, leucine-rich repeat domain, L OS=Rosa chinensis OX=74649 GN=RchiOBHm_Chr4g0414281 PE=4 SV=1	Signal transduction mechanisms	putative disease resistance protein RGA3 isoform X1 [Fragaria vesca subsp. vesca]
							augustus_masked-Fvb1-3-processed-gene-0.12	65763	66461	-	--	Molecular Function: hydrolase activity (GO:0016787);; Molecular Function: ADP binding (GO:0043531);	K13457	Signal transduction mechanisms	NB-ARC domain	Disease resistance protein RGA5 OS=Oryza sativa subsp. japonica OX=39947 GN=RGA5 PE=1 SV=1	Putative P-loop containing nucleoside triphosphate hydrolase, leucine-rich repeat domain, L OS=Rosa chinensis OX=74649 GN=RchiOBHm_Chr5g0027671 PE=4 SV=1	Signal transduction mechanisms	disease resistance protein RPM1-like [Rosa chinensis]
							augustus_masked-Fvb1-3-processed-gene-0.15	78710	79600	-	Signal transduction mechanisms	Molecular Function: protein serine/threonine kinase activity (GO:0004674);; Molecular Function: ATP binding (GO:0005524);	K15255	General function prediction only	Protein kinase domain	Cyclin-dependent kinase F-1 OS=Arabidopsis thaliana OX=3702 GN=CDKF-1 PE=1 SV=1	Protein kinase domain-containing protein OS=Rosa chinensis OX=74649 GN=RchiOBHm_Chr2g0091141 PE=3 SV=1	Signal transduction mechanisms	cyclin-dependent kinase F-1 [Fragaria vesca subsp. vesca]
							augustus_masked-Fvb1-3-processed-gene-0.8	26299	27585	-	--	Molecular Function: protein serine/threonine phosphatase activity (GO:0004722);; Molecular Function: metal ion binding (GO:0046872);	K14497	Signal transduction mechanisms	Protein phosphatase 2C	Protein phosphatase 2C 7 OS=Arabidopsis thaliana OX=3702 GN=HAB2 PE=1 SV=2	Protein-serine/threonine phosphatase OS=Rosa chinensis OX=74649 GN=RchiOBHm_Chr2g0094051 PE=3 SV=1	Signal transduction mechanisms	protein phosphatase 2C 16 [Fragaria vesca subsp. vesca]
							augustus_masked-Fvb1-3-processed-gene-0.9	32470	39410	-	--	Molecular Function: transferase activity (GO:0016740);	--	--	--	--	Putative histone acetyltransferase subunit 3 OS=Rosa chinensis OX=74649 GN=RchiOBHm_Chr2g0094041 PE=3 SV=1	Function unknown	uncharacterized protein LOC101306665 [Fragaria vesca subsp. vesca]
							augustus_masked-Fvb1-3-processed-gene-1.0	88560	90495	-	Amino acid transport and metabolism	Biological Process: oligopeptide transport (GO:0006857);; Cellular Component: integral component of membrane (GO:0016021);; Molecular Function: transmembrane transporter activity (GO:0022857);	K14638	Amino acid transport and metabolism	POT family	Protein NRT1/ PTR FAMILY 1.2 OS=Arabidopsis thaliana OX=3702 GN=NPF1.2 PE=1 SV=1	Putative proton-dependent oligopeptide transporter family, major facilitator superfamily OS=Rosa chinensis OX=74649 GN=RchiOBHm_Chr2g0091191 PE=3 SV=1	Amino acid transport and metabolism	protein NRT1/ PTR FAMILY 1.1-like [Fragaria vesca subsp. vesca]
							augustus_masked-Fvb1-3-processed-gene-1.1	91118	93805	-	--	Cellular Component: Golgi membrane (GO:0000139);; Molecular Function: structural molecule activity (GO:0005198);; Biological Process: intracellular protein transport (GO:0006886);; Biological Process: vesicle-mediated transport (GO:0016192);; Cellular Component: COPI vesicle coat (GO:0030126);	K17267	Intracellular trafficking, secretion, and vesicular transport	Adaptin N terminal region	Coatomer subunit gamma OS=Arabidopsis thaliana OX=3702 GN=At4g34450 PE=1 SV=2	Coatomer subunit gamma OS=Nyssa sinensis OX=561372 GN=F0562_028589 PE=3 SV=1	Intracellular trafficking, secretion, and vesicular transport	coatomer subunit gamma-like [Fragaria vesca subsp. vesca]
							augustus_masked-Fvb1-3-processed-gene-1.10	128113	140117	-	--	--	K24260	General function prediction only	--	--	Putative transcription factor WD40-like family OS=Rosa chinensis OX=74649 GN=RchiOBHm_Chr2g0087941 PE=4 SV=1	Replication, recombination and repair	WD repeat-containing protein 11 [Fragaria vesca subsp. vesca]
							augustus_masked-Fvb1-3-processed-gene-1.5	125593	127662	+	Transcription	Molecular Function: translation elongation factor activity (GO:0003746);; Biological Process: nucleobase-containing compound metabolic process (GO:0006139);; Biological Process: positive regulation of transcription elongation from RNA polymerase II promoter (GO:0032968);	K11292	RNA processing and modification	Holliday-junction resolvase-like of SPT6	Transcription elongation factor SPT6 homolog OS=Arabidopsis thaliana OX=3702 GN=SPT6 PE=1 SV=1	Putative ribonuclease H-like domain, transcription elongation factor Spt6, Tex-like protein OS=Rosa chinensis OX=74649 GN=RchiOBHm_Chr2g0087911 PE=4 SV=1	Transcription	putative ribonuclease H-like domain, transcription elongation factor Spt6, Tex-like protein [Rosa chinensis]
							augustus_masked-Fvb1-3-processed-gene-1.6	140162	140767	+	--	Molecular Function: transcription coregulator activity (GO:0003712);; Biological Process: regulation of transcription, DNA-templated (GO:0006355);	--	--	--	--	Putative coactivator CBP, KIX domain-containing protein OS=Rosa chinensis OX=74649 GN=RchiOBHm_Chr2g0087961 PE=4 SV=1	--	uncharacterized protein LOC101293823 [Fragaria vesca subsp. vesca]
							maker-Fvb1-3-augustus-gene-0.41	16479	22445	+	Cell wall/membrane/envelope biogenesis	Molecular Function: protein serine/threonine kinase activity (GO:0004674);; Molecular Function: ATP binding (GO:0005524);	K08790	General function prediction only	Protein kinase domain	Probable serine/threonine protein kinase IRE3 OS=Arabidopsis thaliana OX=3702 GN=IRE3 PE=2 SV=1	Uncharacterized protein OS=Rosa chinensis OX=74649 GN=RchiOBHm_Chr2g0094031 PE=4 SV=1	Signal transduction mechanisms	serine/threonine-protein kinase tricorner [Fragaria vesca subsp. vesca]
							maker-Fvb1-3-augustus-gene-0.42	51851	56058	+	Signal transduction mechanisms	Molecular Function: voltage-gated chloride channel activity (GO:0005247);; Cellular Component: integral component of membrane (GO:0016021);	K05016	Inorganic ion transport and metabolism	Voltage gated chloride channel	Putative chloride channel-like protein CLC-g OS=Arabidopsis thaliana OX=3702 GN=CLC-G PE=1 SV=2	Putative chloride channel, voltage gated OS=Rosa chinensis OX=74649 GN=RchiOBHm_Chr2g0087431 PE=3 SV=1	Inorganic ion transport and metabolism	putative chloride channel-like protein CLC-g isoform X1 [Fragaria vesca subsp. vesca]
							maker-Fvb1-3-augustus-gene-0.48	57059	60542	-	Signal transduction mechanisms	Molecular Function: protein kinase activity (GO:0004672);; Molecular Function: ATP binding (GO:0005524);	K00924	Signal transduction mechanisms	Protein tyrosine and serine/threonine kinase	Calmodulin-binding receptor-like cytoplasmic kinase 3 OS=Arabidopsis thaliana OX=3702 GN=CRCK3 PE=2 SV=1	Protein kinase domain-containing protein OS=Rosa chinensis OX=74649 GN=RchiOBHm_Chr2g0087441 PE=4 SV=1	Signal transduction mechanisms	calmodulin-binding receptor-like cytoplasmic kinase 3 [Fragaria vesca subsp. vesca]
							maker-Fvb1-3-augustus-gene-0.49	67244	70653	-	--	--	--	Energy production and conversion	--	--	Uncharacterized protein OS=Rosa chinensis OX=74649 GN=RchiOBHm_Chr2g0091121 PE=4 SV=1	--	S-antigen protein-like [Fragaria vesca subsp. vesca]
							maker-Fvb1-3-augustus-gene-0.52	85551	87646	-	Posttranslational modification, protein turnover, chaperones	Molecular Function: peroxidase activity (GO:0004601);; Biological Process: cell redox homeostasis (GO:0045454);; Molecular Function: peroxiredoxin activity (GO:0051920);	K24140	Posttranslational modification, protein turnover, chaperones	Redoxin	Peroxiredoxin-2 OS=Populus trichocarpa OX=3694 PE=1 SV=1	Glutaredoxin-dependent peroxiredoxin OS=Rosa chinensis OX=74649 GN=RchiOBHm_Chr2g0091161 PE=3 SV=1	Posttranslational modification, protein turnover, chaperones	peroxiredoxin-2B [Fragaria vesca subsp. vesca]
							maker-Fvb1-3-augustus-gene-1.42	122667	124441	+	Cytoskeleton	Cellular Component: nucleus (GO:0005634);; Biological Process: chromatin remodeling (GO:0006338);	K11662	Cytoskeleton	Actin	Actin-related protein 6 OS=Arabidopsis thaliana OX=3702 GN=ARP6 PE=1 SV=1	Putative Actin family OS=Rosa chinensis OX=74649 GN=RchiOBHm_Chr2g0087891 PE=3 SV=1	Cytoskeleton	actin-related protein 6 [Fragaria vesca subsp. vesca]
							maker-Fvb1-3-augustus-gene-1.48	104754	108982	-	--	Molecular Function: ubiquitin-protein transferase activity (GO:0004842);; Molecular Function: transferase activity, transferring acyl groups (GO:0016746);; Molecular Function: ligase activity (GO:0016874);	--	--	--	Putative E3 ubiquitin-protein ligase LIN-1 OS=Lotus japonicus OX=34305 GN=CERBERUS PE=2 SV=2	RING-type E3 ubiquitin transferase OS=Rosa chinensis OX=74649 GN=RchiOBHm_Chr2g0091211 PE=4 SV=1	Function unknown	putative E3 ubiquitin-protein ligase LIN isoform X1 [Fragaria vesca subsp. vesca]
							maker-Fvb1-3-snap-gene-0.53	664	2047	+	--	Cellular Component: ribosome (GO:0005840);; Cellular Component: integral component of membrane (GO:0016021);	--	--	--	Uncharacterized protein At5g19025 OS=Arabidopsis thaliana OX=3702 GN=At5g19025 PE=2 SV=3	Putative ribosomal protein L34Ae OS=Rosa chinensis OX=74649 GN=RchiOBHm_Chr2g0167781 PE=4 SV=1	Function unknown	uncharacterized protein At5g19025 [Fragaria vesca subsp. vesca]
							maker-Fvb1-3-snap-gene-0.55	24059	25120	+	--	Molecular Function: protein serine/threonine kinase activity (GO:0004674);; Molecular Function: ATP binding (GO:0005524);	K20603	Signal transduction mechanisms	--	Mitogen-activated protein kinase kinase 1 OS=Oryza sativa subsp. japonica OX=39947 GN=MKK1 PE=1 SV=1	MAP kinase kinase 2 OS=Rosa hybrid cultivar OX=128735 GN=MKK2 PE=2 SV=1	Signal transduction mechanisms	mitogen-activated protein kinase kinase 2 [Fragaria vesca subsp. vesca]
							maker-Fvb1-3-snap-gene-0.57	61417	65167	+	--	Molecular Function: protein serine/threonine kinase activity (GO:0004674);; Molecular Function: ATP binding (GO:0005524);	K11292	General function prediction only	Protein kinase domain	Cyclin-dependent kinase F-1 OS=Arabidopsis thaliana OX=3702 GN=CDKF-1 PE=1 SV=1	Protein kinase domain-containing protein OS=Rosa chinensis OX=74649 GN=RchiOBHm_Chr2g0091141 PE=3 SV=1	Signal transduction mechanisms	cyclin-dependent kinase F-1 [Fragaria vesca subsp. vesca]
							maker-Fvb1-3-snap-gene-0.60	40432	42476	-	--	Molecular Function: transferase activity (GO:0016740);	--	--	--	--	Putative histone acetyltransferase subunit 3 OS=Rosa chinensis OX=74649 GN=RchiOBHm_Chr2g0094041 PE=3 SV=1	Function unknown	uncharacterized protein LOC112183412 isoform X3 [Rosa chinensis]
							maker-Fvb1-3-snap-gene-0.62	43403	45724	-	--	Biological Process: lipid transport (GO:0006869);; Molecular Function: lipid binding (GO:0008289);; Cellular Component: integral component of membrane (GO:0016021);	--	General function prediction only	Synaptotagmin-like mitochondrial-lipid-binding domain	Synaptotagmin-5 OS=Arabidopsis thaliana OX=3702 GN=SYT5 PE=2 SV=1	Putative C2 domain, synaptotagmin-like mitochondrial-lipid-binding domain-containing protein OS=Rosa chinensis OX=74649 GN=RchiOBHm_Chr2g0087411 PE=3 SV=1	Cell wall/membrane/envelope biogenesis	synaptotagmin-5-like [Fragaria vesca subsp. vesca]
							maker-Fvb1-3-snap-gene-0.65	72400	74945	-	--	--	--	--	Plant protein of unknown function (DUF936)	--	Uncharacterized protein OS=Rosa chinensis OX=74649 GN=RchiOBHm_Chr2g0091101 PE=4 SV=1	Function unknown	uncharacterized protein LOC101301592 [Fragaria vesca subsp. vesca]
							maker-Fvb1-3-snap-gene-0.66	80737	83601	-	Transcription	Molecular Function: GTPase activity (GO:0003924);; Molecular Function: GTP binding (GO:0005525);; Biological Process: small GTPase mediated signal transduction (GO:0007264);	K04392	General function prediction only	Ras family	Rac-like GTP-binding protein ARAC7 OS=Arabidopsis thaliana OX=3702 GN=ARAC7 PE=1 SV=1	Putative small GTPase superfamily, P-loop containing nucleoside triphosphate hydrolase OS=Rosa chinensis OX=74649 GN=RchiOBHm_Chr2g0091151 PE=3 SV=1	Function unknown	rac-like GTP-binding protein ARAC7 [Rosa chinensis]
							maker-Fvb1-3-snap-gene-1.58	100033	100887	+
							maker-Fvb1-3-snap-gene-1.59	109991	117697	+	--	Biological Process: regulation of transcription, DNA-templated (GO:0006355);	K14558	General function prediction only	WD domain, G-beta repeat	Topless-related protein 4 OS=Arabidopsis thaliana OX=3702 GN=TPR4 PE=1 SV=2	Putative transcription factor WD40-like family OS=Rosa chinensis OX=74649 GN=RchiOBHm_Chr2g0087841 PE=4 SV=1	Function unknown	topless-related protein 4-like isoform X1 [Fragaria vesca subsp. vesca]
							maker-Fvb1-3-snap-gene-1.60	118746	119660	+	--	Cellular Component: ubiquitin ligase complex (GO:0000151);; Molecular Function: ubiquitin-protein transferase activity (GO:0004842);; Molecular Function: zinc ion binding (GO:0008270);; Biological Process: regulation of seed germination (GO:0010029);	K10632	General function prediction only	--	BRAP2 RING ZnF UBP domain-containing protein 1 OS=Arabidopsis thaliana OX=3702 GN=BRIZ1 PE=1 SV=1	Putative transcription factor C2H2 family OS=Rosa chinensis OX=74649 GN=RchiOBHm_Chr2g0087861 PE=4 SV=1	Posttranslational modification, protein turnover, chaperones	BRCA1-associated protein [Fragaria vesca subsp. vesca]
							maker-Fvb1-3-snap-gene-1.66	94348	102606	-	--	Molecular Function: ubiquitin-protein transferase activity (GO:0004842);; Biological Process: protein ubiquitination (GO:0016567);; Molecular Function: transferase activity, transferring acyl groups (GO:0016746);; Molecular Function: ligase activity (GO:0016874);	K17592	--	U-box domain	Putative E3 ubiquitin-protein ligase LIN-1 OS=Lotus japonicus OX=34305 GN=CERBERUS PE=2 SV=2	RING-type E3 ubiquitin transferase OS=Rosa chinensis OX=74649 GN=RchiOBHm_Chr2g0091211 PE=4 SV=1	Function unknown	putative E3 ubiquitin-protein ligase LIN isoform X1 [Fragaria vesca subsp. vesca]
							maker-Fvb1-3-snap-gene-1.67	120160	121569	-	--	Molecular Function: mRNA binding (GO:0003729);	K14411	General function prediction only	RNA recognition motif. (a.k.a. RRM, RBD, or RNP domain)	RNA-binding protein 1 OS=Arabidopsis thaliana OX=3702 GN=RBP1 PE=2 SV=1	Putative nucleotide-binding alpha-beta plait domain-containing protein OS=Rosa chinensis OX=74649 GN=RchiOBHm_Chr2g0087881 PE=4 SV=1	RNA processing and modification	heterogeneous nuclear ribonucleoprotein 1-like [Fragaria vesca subsp. vesca]
							maker-Fvb1-3-snap-gene-1.70	142589	160915	-	--	Biological Process: response to oomycetes (GO:0002239);; Cellular Component: cellular_component (GO:0005575);; Cellular Component: intracellular (GO:0005622);; Cellular Component: obsolete cell (GO:0005623);; Cellular Component: cytoplasm (GO:0005737);; Cellular Component: vacuole (GO:0005773);; Cellular Component: plasma membrane (GO:0005886);; Biological Process: transport (GO:0006810);; Biolog…	--	--	Plastocyanin-like domain	Umecyanin OS=Armoracia rusticana OX=3704 PE=1 SV=1	Uncharacterized protein OS=Malus domestica OX=3750 GN=DVH24_029145 PE=4 SV=1	Function unknown	blue copper protein-like [Fragaria vesca subsp. vesca]
							snap_masked-Fvb1-3-processed-gene-0.26	76643	77362	+	--	--	--	--	--	--	Putative F-box domain-containing protein OS=Rosa chinensis OX=74649 GN=RchiOBHm_Chr2g0092791 PE=4 SV=1	--	F-box/kelch-repeat protein At3g06240-like [Fragaria vesca subsp. vesca]
							snap_masked-Fvb1-3-processed-gene-0.27	88714	89034	+	--	--	--	--	--	--	Uncharacterized protein OS=Vigna angularis var. angularis OX=157739 GN=Vigan.01G027700 PE=4 SV=1	--	hypothetical protein VIGAN_01027700 [Vigna angularis var. angularis]
							snap_masked-Fvb1-3-processed-gene-0.28	5130	6182	-	--	--	--	--	--	--	Putative F-box domain, leucine-rich repeat domain, L domain-containing protein OS=Rosa chinensis OX=74649 GN=RchiOBHm_Chr2g0167601 PE=4 SV=1	Function unknown	uncharacterized protein LOC112187676 [Rosa chinensis]
							snap_masked-Fvb1-3-processed-gene-1.24	133475	133717	+
Fvb1-3	1050001	1330000	279999	44	0.308621	2.57899
							augustus_masked-Fvb1-3-processed-gene-11.3	1093482	1094246	-	--	--	K22068	--	SAM domain (Sterile alpha motif)	--	Putative sterile alpha motif/pointed domain-containing protein OS=Rosa chinensis OX=74649 GN=RchiOBHm_Chr2g0087001 PE=4 SV=1	Function unknown	uncharacterized protein LOC101299028 [Fragaria vesca subsp. vesca]
							augustus_masked-Fvb1-3-processed-gene-12.12	1200103	1200729	-	--	Molecular Function: histone acetyltransferase activity (GO:0004402);	--	--	Acetyltransferase (GNAT) family	--	Putative histone acetyltransferase OS=Rosa chinensis OX=74649 GN=RchiOBHm_Chr2g0087341 PE=4 SV=1	Function unknown	putative histone acetyltransferase [Rosa chinensis]
							augustus_masked-Fvb1-3-processed-gene-12.14	1217056	1218216	-	--	--	--	--	--	--	Uncharacterized protein OS=Rosa chinensis OX=74649 GN=RchiOBHm_Chr2g0087391 PE=4 SV=1	--	hypothetical protein RchiOBHm_Chr2g0087391 [Rosa chinensis]
							augustus_masked-Fvb1-3-processed-gene-13.10	1315440	1322103	-	--	--	K11138	--	Rap1-interacting factor 1 N terminal	--	Putative telomere-associated protein Rif1 OS=Rosa chinensis OX=74649 GN=RchiOBHm_Chr2g0087621 PE=4 SV=1	Function unknown	uncharacterized protein LOC101314796 isoform X2 [Fragaria vesca subsp. vesca]
							augustus_masked-Fvb1-3-processed-gene-13.2	1298789	1300783	+	--	--	--	--	--	--	Putative BSD domain-containing protein OS=Rosa chinensis OX=74649 GN=RchiOBHm_Chr2g0087581 PE=4 SV=1	--	uncharacterized protein LOC101309188 [Fragaria vesca subsp. vesca]
							maker-Fvb1-3-augustus-gene-10.50	1047854	1054687	+	Coenzyme transport and metabolism	Biological Process: methylation (GO:0032259);; Molecular Function: demethylmenaquinone methyltransferase activity (GO:0043770);; Molecular Function: S-adenosylmethionine:2-demethylquinol-8 methyltransferase activity (GO:0102027);; Molecular Function: S-adenosylmethionine:2-demethylmenaquinol methyltransferase activity (GO:0102094);; Molecular Function: S-adenosylmethionine:2-demethylmenaquinol-7 …	K23095	--	Methyltransferase domain	Uncharacterized methyltransferase At2g41040, chloroplastic OS=Arabidopsis thaliana OX=3702 GN=At2g41040 PE=1 SV=1	Putative demethylmenaquinone methyltransferase transcription factor C2H2 family OS=Rosa chinensis OX=74649 GN=RchiOBHm_Chr2g0086901 PE=4 SV=1	Coenzyme transport and metabolism	uncharacterized methyltransferase At2g41040, chloroplastic-like isoform X2 [Fragaria vesca subsp. vesca]
							maker-Fvb1-3-augustus-gene-10.52	1063487	1067476	+	--	Cellular Component: integral component of membrane (GO:0016021);	--	--	Tetraspanin family	--	Putative mycobacterial pentapeptide OS=Rosa chinensis OX=74649 GN=RchiOBHm_Chr2g0086921 PE=4 SV=1	--	uncharacterized protein LOC101307834 [Fragaria vesca subsp. vesca]
							maker-Fvb1-3-augustus-gene-11.53	1087959	1090823	+	Inorganic ion transport and metabolism	Cellular Component: integral component of membrane (GO:0016021);	--	--	Nodulin-like	--	Putative major facilitator superfamily OS=Rosa chinensis OX=74649 GN=RchiOBHm_Chr2g0086971 PE=4 SV=1	Function unknown	protein NUCLEAR FUSION DEFECTIVE 4-like [Fragaria vesca subsp. vesca]
							maker-Fvb1-3-augustus-gene-11.54	1095409	1097986	+	--	Molecular Function: calcium ion binding (GO:0005509);; Biological Process: mitochondrial calcium ion transmembrane transport (GO:0006851);	K22827	Inorganic ion transport and metabolism	EF hand	Calcium uptake protein, mitochondrial OS=Arabidopsis thaliana OX=3702 GN=MICU PE=2 SV=1	Putative EF-hand domain pair, mitochondrial Rho GTPase OS=Rosa chinensis OX=74649 GN=RchiOBHm_Chr2g0087011 PE=4 SV=1	Signal transduction mechanisms	calcium uptake protein 1, mitochondrial-like [Fragaria vesca subsp. vesca]
							maker-Fvb1-3-augustus-gene-11.55	1100311	1103849	+	--	--	--	--	UBA/TS-N domain	--	Uncharacterized protein OS=Rosa chinensis OX=74649 GN=RchiOBHm_Chr2g0087051 PE=4 SV=1	--	NEDD8 ultimate buster 1 isoform X1 [Fragaria vesca subsp. vesca]
							maker-Fvb1-3-augustus-gene-11.58	1138577	1140706	+	--	Biological Process: metabolic process (GO:0008152);; Cellular Component: membrane (GO:0016020);; Molecular Function: hydrolase activity, acting on glycosyl bonds (GO:0016798);	K07964	--	Glycosyl hydrolase family 79, N-terminal domain	Heparanase-like protein 3 OS=Arabidopsis thaliana OX=3702 GN=At5g34940 PE=2 SV=2	Putative glycosidase OS=Rosa chinensis OX=74649 GN=RchiOBHm_Chr2g0087151 PE=3 SV=1	Function unknown	heparanase-like protein 3 [Fragaria vesca subsp. vesca]
							maker-Fvb1-3-augustus-gene-11.59	1154574	1155902	+	Secondary metabolites biosynthesis, transport and catabolism	Molecular Function: methyltransferase activity (GO:0008168);; Biological Process: methylation (GO:0032259);; Molecular Function: metal ion binding (GO:0046872);; Molecular Function: thebane O-demethylase activity (GO:0102803);; Molecular Function: codeine O-demethylase activity (GO:0102805);	K05277	--	non-haem dioxygenase in morphine synthesis N-terminal	Protein SRG1 OS=Arabidopsis thaliana OX=3702 GN=SRG1 PE=2 SV=1	Putative codeine 3-O-demethylase OS=Rosa chinensis OX=74649 GN=RchiOBHm_Chr2g0087171 PE=3 SV=1	Secondary metabolites biosynthesis, transport and catabolism	leucoanthocyanidin dioxygenase-like [Fragaria vesca subsp. vesca]
							maker-Fvb1-3-augustus-gene-11.61	1164731	1169351	+	Energy production and conversion	Molecular Function: inorganic diphosphatase activity (GO:0004427);; Molecular Function: pyrophosphate hydrolysis-driven proton transmembrane transporter activity (GO:0009678);; Cellular Component: integral component of membrane (GO:0016021);	K23025	--	Inorganic H+ pyrophosphatase	Pyrophosphate-energized vacuolar membrane proton pump OS=Vigna radiata var. radiata OX=3916 PE=1 SV=4	H(+)-exporting diphosphatase OS=Rosa chinensis OX=74649 GN=RchiOBHm_Chr2g0087281 PE=3 SV=1	Energy production and conversion	LOW QUALITY PROTEIN: pyrophosphate-energized vacuolar membrane proton pump-like [Fragaria vesca subsp. vesca]
							maker-Fvb1-3-augustus-gene-11.62	1169772	1174053	+	Amino acid transport and metabolism	Molecular Function: prephenate dehydrogenase (NADP+) activity (GO:0004665);; Biological Process: tyrosine biosynthetic process (GO:0006571);; Molecular Function: prephenate dehydrogenase (NAD+) activity (GO:0008977);; Molecular Function: arogenate dehydrogenase (NADP+) activity (GO:0033730);	K15227	Amino acid transport and metabolism	Prephenate dehydrogenase	Arogenate dehydrogenase 1, chloroplastic OS=Arabidopsis thaliana OX=3702 GN=TYRAAT1 PE=1 SV=1	Putative arogenate dehydrogenase (NADP(+)) OS=Rosa chinensis OX=74649 GN=RchiOBHm_Chr2g0087271 PE=4 SV=1	Amino acid transport and metabolism	arogenate dehydrogenase 1, chloroplastic-like [Fragaria vesca subsp. vesca]
							maker-Fvb1-3-augustus-gene-11.67	1160028	1162593	-	--	Molecular Function: metal ion binding (GO:0046872);	--	--	--	--	Putative transcription factor interactor and regulator LIM family OS=Rosa chinensis OX=74649 GN=RchiOBHm_Chr2g0087291 PE=4 SV=1	Posttranslational modification, protein turnover, chaperones	uncharacterized protein LOC101304122 isoform X2 [Fragaria vesca subsp. vesca]
							maker-Fvb1-3-augustus-gene-12.37	1204166	1207776	+	--	Biological Process: ubiquitin-dependent protein catabolic process (GO:0006511);; Molecular Function: zinc ion binding (GO:0008270);; Biological Process: protein deubiquitination (GO:0016579);; Molecular Function: thiol-dependent ubiquitinyl hydrolase activity (GO:0036459);	K11366	Posttranslational modification, protein turnover, chaperones	Ubiquitin carboxyl-terminal hydrolase	Ubiquitin C-terminal hydrolase 22 OS=Arabidopsis thaliana OX=3702 GN=UBP22 PE=1 SV=1	Ubiquitin carboxyl-terminal hydrolase OS=Prunus persica OX=3760 GN=PRUPE_7G251600 PE=3 SV=1	Posttranslational modification, protein turnover, chaperones	ubiquitin carboxyl-terminal hydrolase 22-like [Fragaria vesca subsp. vesca]
							maker-Fvb1-3-augustus-gene-12.39	1220125	1224193	+	Signal transduction mechanisms	Molecular Function: acid phosphatase activity (GO:0003993);; Molecular Function: peroxidase activity (GO:0004601);; Molecular Function: metal ion binding (GO:0046872);	K22390	Carbohydrate transport and metabolism	Purple acid Phosphatase, N-terminal domain	Bifunctional purple acid phosphatase 26 OS=Arabidopsis thaliana OX=3702 GN=PAP26 PE=1 SV=1	Purple acid phosphatase OS=Rosa chinensis OX=74649 GN=RchiOBHm_Chr2g0087401 PE=3 SV=1	Carbohydrate transport and metabolism	bifunctional purple acid phosphatase 26 [Fragaria vesca subsp. vesca]
							maker-Fvb1-3-augustus-gene-12.40	1235934	1240273	+	Signal transduction mechanisms	Molecular Function: voltage-gated chloride channel activity (GO:0005247);; Cellular Component: integral component of membrane (GO:0016021);	K05016	Inorganic ion transport and metabolism	Voltage gated chloride channel	Putative chloride channel-like protein CLC-g OS=Arabidopsis thaliana OX=3702 GN=CLC-G PE=1 SV=2	Putative chloride channel, voltage gated OS=Rosa chinensis OX=74649 GN=RchiOBHm_Chr2g0087431 PE=3 SV=1	Inorganic ion transport and metabolism	putative chloride channel-like protein CLC-g isoform X1 [Fragaria vesca subsp. vesca]
							maker-Fvb1-3-augustus-gene-12.43	1255217	1261595	+	--	Biological Process: sucrose metabolic process (GO:0005985);; Molecular Function: sucrose synthase activity (GO:0016157);; Molecular Function: sucrose-phosphate synthase activity (GO:0046524);	K00696	Cell wall/membrane/envelope biogenesis	Glycosyl transferases group 1	Probable sucrose-phosphate synthase 1 OS=Citrus unshiu OX=55188 GN=SPS1 PE=2 SV=1	Sucrose-phosphate synthase OS=Rosa chinensis OX=74649 GN=RchiOBHm_Chr2g0087491 PE=3 SV=1	Cell wall/membrane/envelope biogenesis	probable sucrose-phosphate synthase 1 [Fragaria vesca subsp. vesca]	Liao et al., 2021
							maker-Fvb1-3-augustus-gene-12.44	1262199	1264877	+	--	Cellular Component: integral component of membrane (GO:0016021);	K18789	--	Haemolysin-III related	Heptahelical transmembrane protein 1 OS=Arabidopsis thaliana OX=3702 GN=HHP1 PE=1 SV=1	Uncharacterized protein OS=Rosa chinensis OX=74649 GN=RchiOBHm_Chr2g0087501 PE=4 SV=1	Signal transduction mechanisms	heptahelical transmembrane protein 1 isoform X1 [Fragaria vesca subsp. vesca]
							maker-Fvb1-3-augustus-gene-12.45	1265444	1271508	+	--	Biological Process: protein glycosylation (GO:0006486);; Cellular Component: integral component of membrane (GO:0016021);; Molecular Function: transferase activity, transferring glycosyl groups (GO:0016757);	K18789	--	Exostosin family	Probable glycosyltransferase At3g42180 OS=Arabidopsis thaliana OX=3702 GN=At3g42180 PE=2 SV=2	Glycosyltransferase OS=Pyrus ussuriensis x Pyrus communis OX=2448454 GN=D8674_041235 PE=3 SV=1	--	glycosyltransferase [Pyrus ussuriensis x Pyrus communis]
							maker-Fvb1-3-augustus-gene-12.46	1273370	1275409	+	--	Biological Process: protein glycosylation (GO:0006486);; Molecular Function: xylogalacturonan beta-1,3-xylosyltransferase activity (GO:0102983);	K18789	--	Exostosin family	Probable glycosyltransferase At5g11130 OS=Arabidopsis thaliana OX=3702 GN=At5g11130/At5g11120 PE=3 SV=2	Putative xylogalacturonan beta-1,3-xylosyltransferase OS=Rosa chinensis OX=74649 GN=RchiOBHm_Chr2g0087551 PE=3 SV=1	--	probable glycosyltransferase At5g20260 [Fragaria vesca subsp. vesca]
							maker-Fvb1-3-augustus-gene-12.47	1223860	1229843	-	--	Biological Process: lipid transport (GO:0006869);; Molecular Function: lipid binding (GO:0008289);; Cellular Component: integral component of membrane (GO:0016021);	K01613	General function prediction only	C2 domain	Synaptotagmin-5 OS=Arabidopsis thaliana OX=3702 GN=SYT5 PE=2 SV=1	Putative C2 domain, synaptotagmin-like mitochondrial-lipid-binding domain-containing protein OS=Rosa chinensis OX=74649 GN=RchiOBHm_Chr2g0087411 PE=3 SV=1	Cell wall/membrane/envelope biogenesis	synaptotagmin-5-like [Fragaria vesca subsp. vesca]
							maker-Fvb1-3-augustus-gene-13.47	1309032	1314743	-	--	Cellular Component: CCR4-NOT complex (GO:0030014);	K12607	General function prediction only	Tetratricopeptide repeat	--	Putative 43kDa postsynaptic protein OS=Rosa chinensis OX=74649 GN=RchiOBHm_Chr2g0087611 PE=3 SV=1	Function unknown	LOW QUALITY PROTEIN: CCR4-NOT transcription complex subunit 10 [Fragaria vesca subsp. vesca]
							maker-Fvb1-3-snap-gene-10.65	1068973	1077821	+	--	--	--	--	--	--	Uncharacterized protein OS=Rosa chinensis OX=74649 GN=RchiOBHm_Chr2g0086941 PE=4 SV=1	--	hypothetical protein RchiOBHm_Chr2g0086941 [Rosa chinensis]
							maker-Fvb1-3-snap-gene-11.75	1106134	1109864	+	--	--	--	--	--	Protein PHOX1 OS=Arabidopsis thaliana OX=3702 GN=PHOX1 PE=1 SV=1	Putative PB1 domain, tetratricopeptide-like helical domain-containing protein OS=Rosa chinensis OX=74649 GN=RchiOBHm_Chr2g0087071 PE=4 SV=1	--	uncharacterized protein LOC101299611 [Fragaria vesca subsp. vesca]
							maker-Fvb1-3-snap-gene-11.77	1129268	1130821	+	Carbohydrate transport and metabolism	Molecular Function: polygalacturonase activity (GO:0004650);; Cellular Component: extracellular region (GO:0005576);; Biological Process: carbohydrate metabolic process (GO:0005975);; Biological Process: cell wall organization (GO:0071555);	K01184	--	Glycosyl hydrolases family 28	Probable polygalacturonase At3g15720 OS=Arabidopsis thaliana OX=3702 GN=At3g15720 PE=3 SV=1	Putative polygalacturonase OS=Rosa chinensis OX=74649 GN=RchiOBHm_Chr1g0329731 PE=3 SV=1	Carbohydrate transport and metabolism	probable polygalacturonase At3g15720 [Rosa chinensis]
							maker-Fvb1-3-snap-gene-11.85	1097367	1099583	-	--	--	--	Replication, recombination and repair	DDE superfamily endonuclease	Protein ALP1-like OS=Arabidopsis thaliana OX=3702 GN=At3g55350 PE=2 SV=1	PREDICTED: putative nuclease HARBI1 OS=Prunus dulcis OX=3755 GN=ALMOND_2B006805 PE=3 SV=1	Replication, recombination and repair	protein ALP1-like [Rosa chinensis]
							maker-Fvb1-3-snap-gene-11.87	1115779	1127720	-	--	Cellular Component: integral component of membrane (GO:0016021);; Molecular Function: protein-cysteine S-palmitoyltransferase activity (GO:0019706);	K20032	General function prediction only	Ankyrin repeats (3 copies)	Protein S-acyltransferase 24 OS=Arabidopsis thaliana OX=3702 GN=PAT24 PE=2 SV=1	S-acyltransferase OS=Rosa chinensis OX=74649 GN=RchiOBHm_Chr2g0087091 PE=3 SV=1	Function unknown	protein S-acyltransferase 24 [Fragaria vesca subsp. vesca]
							maker-Fvb1-3-snap-gene-11.88	1109988	1111452	-	--	--	--	--	--	--	Putative F-box domain-containing protein OS=Rosa chinensis OX=74649 GN=RchiOBHm_Chr2g0089331 PE=4 SV=1	Translation, ribosomal structure and biogenesis	putative F-box domain-containing protein [Rosa chinensis]
							maker-Fvb1-3-snap-gene-11.90	1131075	1133299	-	--	Cellular Component: integral component of membrane (GO:0016021);	--	--	--	--	Uncharacterized protein OS=Rosa chinensis OX=74649 GN=RchiOBHm_Chr2g0087101 PE=4 SV=1	--	phosphopantothenoylcysteine decarboxylase subunit VHS3 [Rosa chinensis]
							maker-Fvb1-3-snap-gene-11.91	1140892	1147899	-	Carbohydrate transport and metabolism	Cellular Component: integral component of membrane (GO:0016021);; Molecular Function: transmembrane transporter activity (GO:0022857);	K08193	Carbohydrate transport and metabolism	Major Facilitator Superfamily	Probable anion transporter 6, chloroplastic OS=Arabidopsis thaliana OX=3702 GN=ANTR6 PE=2 SV=1	Putative major facilitator superfamily OS=Rosa chinensis OX=74649 GN=RchiOBHm_Chr2g0087161 PE=4 SV=1	Carbohydrate transport and metabolism	probable anion transporter 6, chloroplastic [Fragaria vesca subsp. vesca]
							maker-Fvb1-3-snap-gene-11.93	1173235	1183242	-	Secondary metabolites biosynthesis, transport and catabolism	Molecular Function: oxidoreductase activity (GO:0016491);; Molecular Function: metal ion binding (GO:0046872);	K05658	--	2OG-Fe(II) oxygenase superfamily	Protein SRG1 OS=Arabidopsis thaliana OX=3702 GN=SRG1 PE=2 SV=1	Uncharacterized protein OS=Malus domestica OX=3750 GN=DVH24_017710 PE=4 SV=1	Secondary metabolites biosynthesis, transport and catabolism	Codeine O-demethylase [Glycine soja]
							maker-Fvb1-3-snap-gene-12.50	1212412	1216309	+	General function prediction only	Molecular Function: GTP binding (GO:0005525);; Molecular Function: hydrolase activity (GO:0016787);	--	--	Translocase of chloroplast 159/132, membrane anchor domain	Translocase of chloroplast 90, chloroplastic OS=Arabidopsis thaliana OX=3702 GN=TOC90 PE=1 SV=1	Putative small monomeric GTPase OS=Rosa chinensis OX=74649 GN=RchiOBHm_Chr2g0087381 PE=4 SV=1	Function unknown	translocase of chloroplast 90, chloroplastic [Fragaria vesca subsp. vesca]
							maker-Fvb1-3-snap-gene-12.53	1244370	1252147	+	Transcription	Molecular Function: translation elongation factor activity (GO:0003746);; Cellular Component: nucleus (GO:0005634);; Biological Process: nucleobase-containing compound metabolic process (GO:0006139);; Biological Process: positive regulation of transcription elongation from RNA polymerase II promoter (GO:0032968);	K11292	RNA processing and modification	Helix-hairpin-helix motif	Transcription elongation factor SPT6 homolog OS=Arabidopsis thaliana OX=3702 GN=SPT6 PE=1 SV=1	Transcription elongation factor spt6 OS=Prunus dulcis OX=3755 GN=ALMOND_2B002293 PE=3 SV=1	Transcription	transcription elongation factor SPT6 homolog [Prunus avium]
							maker-Fvb1-3-snap-gene-12.60	1240057	1242631	-	Signal transduction mechanisms	Molecular Function: protein kinase activity (GO:0004672);; Molecular Function: ATP binding (GO:0005524);	K00924	Signal transduction mechanisms	Protein tyrosine and serine/threonine kinase	Calmodulin-binding receptor-like cytoplasmic kinase 3 OS=Arabidopsis thaliana OX=3702 GN=CRCK3 PE=2 SV=1	Protein kinase domain-containing protein OS=Rosa chinensis OX=74649 GN=RchiOBHm_Chr2g0087441 PE=4 SV=1	Signal transduction mechanisms	calmodulin-binding receptor-like cytoplasmic kinase 3 [Fragaria vesca subsp. vesca]
							maker-Fvb1-3-snap-gene-13.54	1280215	1289922	+	--	Molecular Function: transferase activity (GO:0016740);; Biological Process: N-terminal peptidyl-methionine acetylation (GO:0017196);; Cellular Component: NatC complex (GO:0031417);	K20823	General function prediction only	Mak10 subunit, NatC N(alpha)-terminal acetyltransferase	--	Putative NatC N(Alpha)-terminal acetyltransferase, Mak10 subunit OS=Rosa chinensis OX=74649 GN=RchiOBHm_Chr2g0087561 PE=3 SV=1	Function unknown	N-alpha-acetyltransferase 35, NatC auxiliary subunit [Fragaria vesca subsp. vesca]
							maker-Fvb1-3-snap-gene-13.56	1305633	1307031	+	--	--	--	--	Hydrophobic seed protein	36.4 kDa proline-rich protein OS=Solanum lycopersicum OX=4081 GN=TPRP-F1 PE=2 SV=1	AAI domain-containing protein OS=Prunus persica OX=3760 GN=PRUPE_ppa010958mg PE=3 SV=1	Function unknown	36.4 kDa proline-rich protein [Fragaria vesca subsp. vesca]
							maker-Fvb1-3-snap-gene-13.57	1323718	1325696	+	--	--	--	--	--	--	--	--	uncharacterized protein LOC101296428 [Fragaria vesca subsp. vesca]
							snap_masked-Fvb1-3-processed-gene-10.42	1075097	1075285	-
							snap_masked-Fvb1-3-processed-gene-10.43	1075382	1075627	-	--	--	--	--	--	--	Uncharacterized protein OS=Malus domestica OX=3750 GN=DVH24_029073 PE=4 SV=1	--	hypothetical protein DVH24_029073 [Malus domestica]
							snap_masked-Fvb1-3-processed-gene-11.52	1185858	1189114	-	Secondary metabolites biosynthesis, transport and catabolism	Molecular Function: methyltransferase activity (GO:0008168);; Biological Process: methylation (GO:0032259);; Molecular Function: metal ion binding (GO:0046872);; Molecular Function: thebane O-demethylase activity (GO:0102803);; Molecular Function: codeine O-demethylase activity (GO:0102805);	K24028	--	2OG-Fe(II) oxygenase superfamily	Flavanone 3-dioxygenase 2 OS=Oryza sativa subsp. japonica OX=39947 GN=F3H-2 PE=1 SV=1	Putative codeine 3-O-demethylase OS=Rosa chinensis OX=74649 GN=RchiOBHm_Chr2g0087191 PE=3 SV=1	Secondary metabolites biosynthesis, transport and catabolism	uncharacterized protein LOC101302485 [Fragaria vesca subsp. vesca]
							snap_masked-Fvb1-3-processed-gene-13.19	1292655	1297644	+	--	Molecular Function: 1-phosphatidylinositol binding (GO:0005545);; Cellular Component: clathrin-coated vesicle (GO:0030136);; Molecular Function: clathrin binding (GO:0030276);; Biological Process: clathrin coat assembly (GO:0048268);	K20043	--	ANTH domain	Putative clathrin assembly protein At5g35200 OS=Arabidopsis thaliana OX=3702 GN=At5g35200 PE=1 SV=1	Putative ANTH domain-containing protein OS=Rosa chinensis OX=74649 GN=RchiOBHm_Chr2g0087571 PE=4 SV=1	--	putative clathrin assembly protein At5g35200 [Fragaria vesca subsp. vesca]
							snap_masked-Fvb1-3-processed-gene-13.21	1301423	1301996	+
Fvb1-3	1560001	1820000	259999	64	0.322707	2.97945
							augustus_masked-Fvb1-3-processed-gene-15.22	1565533	1565853	-	--	Molecular Function: DNA binding (GO:0003677);; Molecular Function: DNA-binding transcription factor activity (GO:0003700);; Cellular Component: nucleus (GO:0005634);	--	--	--	Ethylene-responsive transcription factor WIN1 OS=Arabidopsis thaliana OX=3702 GN=WIN1 PE=2 SV=1	Transcription factor ERF36 OS=Fragaria ananassa OX=3747 PE=2 SV=1	Transcription	ethylene-responsive transcription factor WIN1-like [Fragaria vesca subsp. vesca]
							augustus_masked-Fvb1-3-processed-gene-15.23	1570658	1571158	-	--	--	--	--	--	--	Uncharacterized protein OS=Rosa chinensis OX=74649 GN=RchiOBHm_Chr2g0115891 PE=4 SV=1	--	uncharacterized protein LOC105349647 [Fragaria vesca subsp. vesca]
							augustus_masked-Fvb1-3-processed-gene-16.11	1645366	1648203	-	Amino acid transport and metabolism	Biological Process: oligopeptide transport (GO:0006857);; Cellular Component: integral component of membrane (GO:0016021);; Molecular Function: transmembrane transporter activity (GO:0022857);	K14638	Amino acid transport and metabolism	POT family	Protein NRT1/ PTR FAMILY 6.2 OS=Arabidopsis thaliana OX=3702 GN=NPF6.2 PE=1 SV=1	Putative proton-dependent oligopeptide transporter family, major facilitator superfamily OS=Rosa chinensis OX=74649 GN=RchiOBHm_Chr2g0088601 PE=3 SV=1	Amino acid transport and metabolism	protein NRT1/ PTR FAMILY 6.2 [Fragaria vesca subsp. vesca]
							augustus_masked-Fvb1-3-processed-gene-16.13	1672087	1672824	-	--	Cellular Component: integral component of membrane (GO:0016021);	--	--	Fasciclin domain	Fasciclin-like arabinogalactan protein 9 OS=Arabidopsis thaliana OX=3702 GN=FLA9 PE=2 SV=1	Putative FAS1 domain-containing protein OS=Rosa chinensis OX=74649 GN=RchiOBHm_Chr2g0088651 PE=3 SV=1	Function unknown	fasciclin-like arabinogalactan protein 13 [Fragaria vesca subsp. vesca]
							augustus_masked-Fvb1-3-processed-gene-16.16	1685675	1686262	-	--	Molecular Function: ubiquitin activating enzyme activity (GO:0004839);; Molecular Function: transferase activity, transferring acyl groups (GO:0016746);; Molecular Function: ubiquitin protein ligase activity (GO:0061630);	K11982	Posttranslational modification, protein turnover, chaperones	Ring finger domain	RING-H2 finger protein ATL17 OS=Arabidopsis thaliana OX=3702 GN=ATL17 PE=2 SV=2	RING-type E3 ubiquitin transferase OS=Rosa chinensis OX=74649 GN=RchiOBHm_Chr1g0368011 PE=4 SV=1	Posttranslational modification, protein turnover, chaperones	E3 ubiquitin-protein ligase RNF126-like [Fragaria vesca subsp. vesca]
							augustus_masked-Fvb1-3-processed-gene-16.17	1688036	1689124	-	Posttranslational modification, protein turnover, chaperones	--	K09518	Posttranslational modification, protein turnover, chaperones	DnaJ domain	Chaperone protein dnaJ 49 OS=Arabidopsis thaliana OX=3702 GN=ATJ49 PE=2 SV=2	Putative DnaJ domain-containing protein OS=Rosa chinensis OX=74649 GN=RchiOBHm_Chr2g0088701 PE=4 SV=1	Posttranslational modification, protein turnover, chaperones	chaperone protein dnaJ 49-like [Fragaria vesca subsp. vesca]
							augustus_masked-Fvb1-3-processed-gene-16.3	1635059	1636285	+	--	--	K05849	General function prediction only	PPR repeat	Pentatricopeptide repeat-containing protein At2g22410, mitochondrial OS=Arabidopsis thaliana OX=3702 GN=PCMP-E28 PE=2 SV=1	Putative tetratricopeptide-like helical domain-containing protein OS=Rosa chinensis OX=74649 GN=RchiOBHm_Chr2g0088571 PE=4 SV=1	Function unknown	pentatricopeptide repeat-containing protein At5g48910-like [Fragaria vesca subsp. vesca]
							augustus_masked-Fvb1-3-processed-gene-16.4	1642874	1643905	+	--	Cellular Component: integral component of membrane (GO:0016021);	K15285	--	Triose-phosphate Transporter family	Probable sugar phosphate/phosphate translocator At2g25520 OS=Arabidopsis thaliana OX=3702 GN=At2g25520 PE=1 SV=1	Putative sugar phosphate transporter domain-containing protein OS=Rosa chinensis OX=74649 GN=RchiOBHm_Chr2g0088591 PE=4 SV=1	--	probable sugar phosphate/phosphate translocator At2g25520 [Fragaria vesca subsp. vesca]
							augustus_masked-Fvb1-3-processed-gene-16.9	1629674	1634956	-
							augustus_masked-Fvb1-3-processed-gene-17.1	1692961	1694417	+	--	Molecular Function: ATP transmembrane transporter activity (GO:0005347);; Cellular Component: integral component of membrane (GO:0016021);	K14684	Energy production and conversion	Mitochondrial carrier protein	Adenine nucleotide transporter BT1, chloroplastic/mitochondrial OS=Arabidopsis thaliana OX=3702 GN=BT1 PE=1 SV=1	Putative mitochondrial carrier protein OS=Rosa chinensis OX=74649 GN=RchiOBHm_Chr2g0088721 PE=3 SV=1	Energy production and conversion	adenine nucleotide transporter BT1, chloroplastic/mitochondrial [Fragaria vesca subsp. vesca]
							augustus_masked-Fvb1-3-processed-gene-17.11	1727551	1727901	-	--	--	K00326	--	Domain of unknown function (DUF4666)	MAPK kinase substrate protein At1g80180 OS=Arabidopsis thaliana OX=3702 GN=At1g80180 PE=1 SV=1	Uncharacterized protein OS=Rosa chinensis OX=74649 GN=RchiOBHm_Chr2g0089091 PE=4 SV=1	Function unknown	uncharacterized protein At1g15400-like [Fragaria vesca subsp. vesca]
							augustus_masked-Fvb1-3-processed-gene-17.16	1748969	1750562	-	--	Molecular Function: metal ion binding (GO:0046872);	--	General function prediction only	Zn-finger in Ran binding protein and others	--	PREDICTED: zinc finger OS=Prunus dulcis OX=3755 GN=ALMOND_2B022675 PE=4 SV=1	Translation, ribosomal structure and biogenesis	zinc finger Ran-binding domain-containing protein 2 [Fragaria vesca subsp. vesca]
							augustus_masked-Fvb1-3-processed-gene-17.3	1706024	1711185	+	Coenzyme transport and metabolism	Molecular Function: ethanolamine kinase activity (GO:0004305);	K00894	Lipid transport and metabolism	Choline/ethanolamine kinase	Probable ethanolamine kinase OS=Arabidopsis thaliana OX=3702 GN=EMB1187 PE=2 SV=1	Putative ethanolamine kinase OS=Rosa chinensis OX=74649 GN=RchiOBHm_Chr2g0089031 PE=4 SV=1	Lipid transport and metabolism	probable ethanolamine kinase [Fragaria vesca subsp. vesca]
							augustus_masked-Fvb1-3-processed-gene-17.9	1700272	1702602	-	--	--	--	--	--	--	Putative kelch-type beta propeller OS=Rosa chinensis OX=74649 GN=RchiOBHm_Chr4g0406891 PE=4 SV=1	--	putative kelch-type beta propeller [Rosa chinensis]
							augustus_masked-Fvb1-3-processed-gene-18.1	1794301	1796815	+	--	--	K22763	Function unknown	PPPDE putative peptidase domain	DeSI-like protein At4g17486 OS=Arabidopsis thaliana OX=3702 GN=At4g17486 PE=2 SV=1	Putative PPPDE putative peptidase domain-containing protein OS=Rosa chinensis OX=74649 GN=RchiOBHm_Chr2g0089231 PE=3 SV=1	Function unknown	deSI-like protein At4g17486 isoform X1 [Fragaria vesca subsp. vesca]
							augustus_masked-Fvb1-3-processed-gene-18.8	1801524	1802906	-	--	Molecular Function: protein serine/threonine kinase activity (GO:0004674);; Molecular Function: ATP binding (GO:0005524);; Cellular Component: integral component of membrane (GO:0016021);	K13416	Signal transduction mechanisms	Protein kinase domain	Probable receptor-like protein kinase At5g20050 OS=Arabidopsis thaliana OX=3702 GN=At5g20050 PE=2 SV=1	Protein kinase domain-containing protein OS=Rosa chinensis OX=74649 GN=RchiOBHm_Chr2g0089251 PE=3 SV=1	Signal transduction mechanisms	probable receptor-like protein kinase At5g20050 [Fragaria vesca subsp. vesca]
							maker-Fvb1-3-augustus-gene-15.67	1568152	1570423	+	--	Biological Process: cellular response to phosphate starvation (GO:0016036);	K24195	Inorganic ion transport and metabolism	SPX domain	SPX domain-containing protein 2 OS=Arabidopsis thaliana OX=3702 GN=SPX2 PE=2 SV=1	Putative SPX domain-containing protein OS=Rosa chinensis OX=74649 GN=RchiOBHm_Chr2g0088351 PE=4 SV=1	Inorganic ion transport and metabolism	SPX domain-containing protein 1-like [Fragaria vesca subsp. vesca]
							maker-Fvb1-3-augustus-gene-15.68	1572195	1573777	+	--	Molecular Function: peroxidase activity (GO:0004601);; Cellular Component: extracellular region (GO:0005576);; Biological Process: response to oxidative stress (GO:0006979);; Molecular Function: heme binding (GO:0020037);; Biological Process: hydrogen peroxide catabolic process (GO:0042744);; Molecular Function: metal ion binding (GO:0046872);	K00430	--	Peroxidase	Peroxidase 25 OS=Arabidopsis thaliana OX=3702 GN=PER25 PE=2 SV=2	Peroxidase OS=Rosa chinensis OX=74649 GN=RchiOBHm_Chr2g0088361 PE=3 SV=1	Secondary metabolites biosynthesis, transport and catabolism	peroxidase 25 [Fragaria vesca subsp. vesca]
							maker-Fvb1-3-augustus-gene-15.69	1576128	1578777	+	--	Molecular Function: heme oxygenase (decyclizing) activity (GO:0004392);; Biological Process: heme oxidation (GO:0006788);	K21480	Inorganic ion transport and metabolism	Heme oxygenase	Heme oxygenase 1, chloroplastic OS=Arabidopsis thaliana OX=3702 GN=HO1 PE=1 SV=2	Putative Heme oxygenase (Biliverdin-producing) OS=Rosa chinensis OX=74649 GN=RchiOBHm_Chr2g0088381 PE=3 SV=1	Inorganic ion transport and metabolism	heme oxygenase 1, chloroplastic [Fragaria vesca subsp. vesca]
							maker-Fvb1-3-augustus-gene-15.77	1561094	1564851	-	--	Molecular Function: molecular_function (GO:0003674);; Molecular Function: GTPase activator activity (GO:0005096);; Molecular Function: binding (GO:0005488);; Molecular Function: protein binding (GO:0005515);; Cellular Component: cellular_component (GO:0005575);; Cellular Component: intracellular (GO:0005622);; Cellular Component: obsolete cell (GO:0005623);; Biological Process: transport (GO:0006…	K20360	General function prediction only	Rab-GTPase-TBC domain	--	Putative Rab-GTPase-TBC domain-containing protein OS=Rosa chinensis OX=74649 GN=RchiOBHm_Chr2g0088311 PE=4 SV=1	Intracellular trafficking, secretion, and vesicular transport	TBC1 domain family member 13-like [Fragaria vesca subsp. vesca]
							maker-Fvb1-3-augustus-gene-15.78	1581176	1582588	-	--	--	--	--	--	Protein BUNDLE SHEATH DEFECTIVE 2, chloroplastic OS=Arabidopsis thaliana OX=3702 GN=BSD2 PE=1 SV=1	Putative Heat shock protein DnaJ, cysteine-rich OS=Rosa chinensis OX=74649 GN=RchiOBHm_Chr2g0088401 PE=4 SV=1	--	uncharacterized protein LOC101296704 [Fragaria vesca subsp. vesca]
							maker-Fvb1-3-augustus-gene-15.79	1584248	1587129	-	Translation, ribosomal structure and biogenesis	Molecular Function: methyltransferase activity (GO:0008168);; Cellular Component: integral component of membrane (GO:0016021);; Biological Process: methylation (GO:0032259);	--	--	Methyltransferase FkbM domain	--	Putative S-adenosyl-L-methionine-dependent methyltransferase OS=Rosa chinensis OX=74649 GN=RchiOBHm_Chr2g0088431 PE=4 SV=1	Function unknown	uncharacterized protein LOC101298353 [Fragaria vesca subsp. vesca]
							maker-Fvb1-3-augustus-gene-16.42	1598727	1599742	+	Carbohydrate transport and metabolism	Molecular Function: polygalacturonase activity (GO:0004650);; Cellular Component: extracellular region (GO:0005576);; Biological Process: carbohydrate metabolic process (GO:0005975);; Biological Process: cell wall organization (GO:0071555);	K01184	--	Glycosyl hydrolases family 28	Polygalacturonase OS=Prunus persica OX=3760 PE=2 SV=1	Uncharacterized protein OS=Prunus persica OX=3760 GN=PRUPE_7G242600 PE=3 SV=1	Carbohydrate transport and metabolism	probable polygalacturonase At1g80170 isoform X1 [Fragaria vesca subsp. vesca]
							maker-Fvb1-3-augustus-gene-16.43	1682322	1685330	+	Intracellular trafficking, secretion, and vesicular transport	Biological Process: signal peptide processing (GO:0006465);; Molecular Function: peptidase activity (GO:0008233);; Cellular Component: integral component of membrane (GO:0016021);	K13280	Intracellular trafficking, secretion, and vesicular transport	Peptidase S24-like	--	Signal peptidase I OS=Rosa chinensis OX=74649 GN=RchiOBHm_Chr2g0088691 PE=3 SV=1	Intracellular trafficking, secretion, and vesicular transport	signal peptidase complex catalytic subunit SEC11A-like [Fragaria vesca subsp. vesca]
							maker-Fvb1-3-augustus-gene-16.45	1620235	1626388	-	Replication, recombination and repair	Molecular Function: hydrolase activity (GO:0016787);	K10706	RNA processing and modification	AAA domain	Probable helicase MAGATAMA 3 OS=Arabidopsis thaliana OX=3702 GN=MAA3 PE=2 SV=1	Putative P-loop containing nucleoside triphosphate hydrolase OS=Rosa chinensis OX=74649 GN=RchiOBHm_Chr6g0264601 PE=4 SV=1	RNA processing and modification	uncharacterized protein LOC101300152 [Fragaria vesca subsp. vesca]
							maker-Fvb1-3-augustus-gene-16.46	1634974	1639978	-	--	Molecular Function: glucuronosyltransferase activity (GO:0015020);; Cellular Component: integral component of membrane (GO:0016021);	K20891	Carbohydrate transport and metabolism	Core-2/I-Branching enzyme	Beta-glucuronosyltransferase GlcAT14B OS=Arabidopsis thaliana OX=3702 GN=GLCAT14B PE=2 SV=1	Putative glucuronosyltransferase OS=Rosa chinensis OX=74649 GN=RchiOBHm_Chr2g0088581 PE=4 SV=1	Carbohydrate transport and metabolism	xylosyltransferase 1-like [Fragaria vesca subsp. vesca]
							maker-Fvb1-3-augustus-gene-16.48	1679638	1681425	-	Translation, ribosomal structure and biogenesis	Molecular Function: RNA binding (GO:0003723);; Cellular Component: nucleolus (GO:0005730);; Cellular Component: ribosome (GO:0005840);; Biological Process: ribosome biogenesis (GO:0042254);; Cellular Component: ribonucleoprotein complex (GO:1990904);	K12845	--	Ribosomal protein L7Ae/L30e/S12e/Gadd45 family	--	Ribonucloprotein OS=Rosa chinensis OX=74649 GN=RchiOBHm_Chr2g0088681 PE=3 SV=1	--	NHP2-like protein 1 [Fragaria vesca subsp. vesca]
							maker-Fvb1-3-augustus-gene-17.50	1689408	1692517	+	--	Cellular Component: nucleus (GO:0005634);; Biological Process: ribosome biogenesis (GO:0042254);	K14852	Translation, ribosomal structure and biogenesis	Ribosome biogenesis regulatory protein (RRS1)	Ribosome biogenesis regulatory protein homolog OS=Arabidopsis thaliana OX=3702 GN=At2g37990 PE=2 SV=2	Ribosome biogenesis regulatory protein OS=Rosa chinensis OX=74649 GN=RchiOBHm_Chr2g0088711 PE=3 SV=1	Translation, ribosomal structure and biogenesis	ribosome biogenesis regulatory protein homolog [Fragaria vesca subsp. vesca]
							maker-Fvb1-3-augustus-gene-17.54	1718307	1719577	+	Secondary metabolites biosynthesis, transport and catabolism	Molecular Function: dioxygenase activity (GO:0051213);	K08234	--	Glyoxalase/Bleomycin resistance protein/Dioxygenase superfamily	--	Putative glyoxalase/Bleomycin resistance protein/Dihydroxybiphenyl dioxygenase OS=Rosa chinensis OX=74649 GN=RchiOBHm_Chr2g0089061 PE=4 SV=1	Function unknown	uncharacterized protein LOC101304028 [Fragaria vesca subsp. vesca]
							maker-Fvb1-3-augustus-gene-17.55	1722855	1724199	+	--	Biological Process: microtubule-based process (GO:0007017);; Molecular Function: hydrolase activity (GO:0016787);; Cellular Component: dynein complex (GO:0030286);	K10418	Cytoskeleton	Dynein light chain type 1	--	Putative dynein ATPase OS=Rosa chinensis OX=74649 GN=RchiOBHm_Chr2g0089081 PE=4 SV=1	Cytoskeleton	uncharacterized protein LOC101300482 [Fragaria vesca subsp. vesca]
							maker-Fvb1-3-augustus-gene-17.56	1739274	1741723	+	Cell wall/membrane/envelope biogenesis	Biological Process: nitrogen compound metabolic process (GO:0006807);; Molecular Function: aspartate racemase activity (GO:0047689);	--	--	Asp/Glu/Hydantoin racemase	--	Putative aspartate racemase OS=Rosa chinensis OX=74649 GN=RchiOBHm_Chr2g0089121 PE=4 SV=1	Cell wall/membrane/envelope biogenesis	uncharacterized protein LOC101305100 [Fragaria vesca subsp. vesca]
							maker-Fvb1-3-augustus-gene-17.57	1777191	1778661	+	--	Cellular Component: integral component of membrane (GO:0016021);	--	--	--	--	Putative Heat shock protein DnaJ, cysteine-rich OS=Rosa chinensis OX=74649 GN=RchiOBHm_Chr2g0089201 PE=4 SV=1	--	uncharacterized protein LOC101308207 [Fragaria vesca subsp. vesca]
							maker-Fvb1-3-augustus-gene-17.58	1783630	1788187	+	--	Molecular Function: protein kinase activity (GO:0004672);; Molecular Function: ATP binding (GO:0005524);	K04424	Signal transduction mechanisms	Protein tyrosine and serine/threonine kinase	Probable serine/threonine-protein kinase SIS8 OS=Arabidopsis thaliana OX=3702 GN=SIS8 PE=1 SV=1	Protein kinase domain-containing protein OS=Rosa chinensis OX=74649 GN=RchiOBHm_Chr2g0089211 PE=4 SV=1	Signal transduction mechanisms	uncharacterized protein LOC101302206 [Fragaria vesca subsp. vesca]
							maker-Fvb1-3-augustus-gene-17.59	1694534	1698258	-	Replication, recombination and repair	Molecular Function: nucleic acid binding (GO:0003676);; Molecular Function: RNA helicase activity (GO:0003724);; Molecular Function: ATP binding (GO:0005524);	K11594	RNA processing and modification	DEAD/DEAH box helicase	DEAD-box ATP-dependent RNA helicase 37 OS=Arabidopsis thaliana OX=3702 GN=RH37 PE=2 SV=2	Putative RNA helicase OS=Rosa chinensis OX=74649 GN=RchiOBHm_Chr2g0088731 PE=4 SV=1	RNA processing and modification	DEAD-box ATP-dependent RNA helicase 52B-like [Fragaria vesca subsp. vesca]
							maker-Fvb1-3-augustus-gene-17.68	1759512	1761299	-	--	Cellular Component: integral component of membrane (GO:0016021);	--	--	Early nodulin 93 ENOD93 protein	Early nodulin-93 OS=Glycine max OX=3847 PE=2 SV=1	Putative early nodulin 93 ENOD93 protein OS=Rosa chinensis OX=74649 GN=RchiOBHm_Chr2g0089171 PE=4 SV=1	Function unknown	early nodulin-93-like [Fragaria vesca subsp. vesca]
							maker-Fvb1-3-augustus-gene-17.69	1763423	1765498	-	Intracellular trafficking, secretion, and vesicular transport	Molecular Function: protein kinase activity (GO:0004672);; Molecular Function: ATP binding (GO:0005524);	K08286	General function prediction only	Protein kinase domain	Protein kinase PINOID 2 OS=Oryza sativa subsp. japonica OX=39947 GN=PID2 PE=2 SV=1	Protein kinase domain-containing protein OS=Rosa chinensis OX=74649 GN=RchiOBHm_Chr2g0089181 PE=4 SV=1	Signal transduction mechanisms	protein kinase PINOID 2 [Fragaria vesca subsp. vesca]
							maker-Fvb1-3-augustus-gene-18.38	1806431	1810344	+	General function prediction only	Molecular Function: protein-arginine N-methyltransferase activity (GO:0016274);	K11434	--	Ribosomal protein L11 methyltransferase (PrmA)	Protein arginine N-methyltransferase PRMT10 OS=Arabidopsis thaliana OX=3702 GN=PRMT10 PE=1 SV=1	Putative methyltransferase OS=Rosa chinensis OX=74649 GN=RchiOBHm_Chr2g0089261 PE=4 SV=1	--	protein arginine N-methyltransferase PRMT10 [Fragaria vesca subsp. vesca]
							maker-Fvb1-3-augustus-gene-18.39	1813812	1816558	+	--	--	--	--	Agenet domain	--	Putative ENT domain, Agenet-like domain, Agenet domain, plant type OS=Rosa chinensis OX=74649 GN=RchiOBHm_Chr2g0089371 PE=4 SV=1	Function unknown	uncharacterized protein LOC101310150 [Fragaria vesca subsp. vesca]
							maker-Fvb1-3-augustus-gene-18.45	1797134	1800039	-	General function prediction only	Molecular Function: lysophospholipase activity (GO:0004622);; Molecular Function: phosphatidyl phospholipase B activity (GO:0102545);	K06130	Lipid transport and metabolism	Phospholipase/Carboxylesterase	--	Putative lysophospholipase OS=Rosa chinensis OX=74649 GN=RchiOBHm_Chr2g0089241 PE=4 SV=1	Lipid transport and metabolism	acyl-protein thioesterase 2 isoform X1 [Rosa chinensis]
							maker-Fvb1-3-snap-gene-15.91	1582216	1585784	+	--	--	--	--	Protein of unknown function (DUF3119)	--	Uncharacterized protein OS=Rosa chinensis OX=74649 GN=RchiOBHm_Chr2g0088411 PE=4 SV=1	Function unknown	uncharacterized protein LOC101296996 [Fragaria vesca subsp. vesca]
							maker-Fvb1-3-snap-gene-15.97	1557437	1560692	-	Lipid transport and metabolism	Molecular Function: phospholipase D activity (GO:0004630);; Molecular Function: calcium ion binding (GO:0005509);; Cellular Component: membrane (GO:0016020);; Biological Process: lipid catabolic process (GO:0016042);; Biological Process: phosphatidylcholine metabolic process (GO:0046470);; Molecular Function: N-acylphosphatidylethanolamine-specific phospholipase D activity (GO:0070290);	K01115	Lipid transport and metabolism	Phospholipase D C terminal	Phospholipase D alpha 1 OS=Vigna unguiculata OX=3917 GN=PLD1 PE=2 SV=1	Phospholipase D OS=Rosa chinensis OX=74649 GN=RchiOBHm_Chr2g0088301 PE=3 SV=1	Lipid transport and metabolism	phospholipase D alpha 1-like [Fragaria vesca subsp. vesca]
							maker-Fvb1-3-snap-gene-16.49	1587356	1592423	+	--	Biological Process: carbohydrate metabolic process (GO:0005975);; Molecular Function: carbohydrate binding (GO:0030246);; Molecular Function: rhamnogalacturonan endolyase activity (GO:0102210);	K18195	--	Polysaccharide lyase family 4, domain III	--	Rhamnogalacturonan endolyase OS=Fragaria chiloensis OX=101007 GN=RGL1 PE=2 SV=1	Function unknown	rhamnogalacturonan endolyase [Fragaria chiloensis]
							maker-Fvb1-3-snap-gene-16.53	1586627	1587185	+
							maker-Fvb1-3-snap-gene-16.54	1663604	1663995	+
							maker-Fvb1-3-snap-gene-16.55	1668785	1670776	+	--	Biological Process: regulation of cytokine production (GO:0001817);; Biological Process: negative regulation of cytokine production (GO:0001818);; Biological Process: regulation of cytokine-mediated signaling pathway (GO:0001959);; Biological Process: negative regulation of cytokine-mediated signaling pathway (GO:0001960);; Molecular Function: molecular_function (GO:0003674);; Molecular Function:…	K23788	--	Ring finger domain	--	Putative transcription factor C2H2 family OS=Rosa chinensis OX=74649 GN=RchiOBHm_Chr6g0259471 PE=4 SV=1	Posttranslational modification, protein turnover, chaperones	probable E3 ubiquitin-protein ligase RHA1A [Rosa chinensis]
							maker-Fvb1-3-snap-gene-16.56	1677470	1678949	+
							maker-Fvb1-3-snap-gene-17.74	1714594	1717672	+
							maker-Fvb1-3-snap-gene-17.80	1779625	1780129	+	--	--	--	--	--	--	Putative kelch-type beta propeller OS=Rosa chinensis OX=74649 GN=RchiOBHm_Chr4g0406891 PE=4 SV=1	--	putative kelch-type beta propeller [Rosa chinensis]
							maker-Fvb1-3-snap-gene-17.84	1728855	1736065	-	Energy production and conversion	Molecular Function: cytochrome-b5 reductase activity, acting on NAD(P)H (GO:0004128);	K00326	--	Oxidoreductase NAD-binding domain	NADH-cytochrome b5 reductase-like protein OS=Arabidopsis thaliana OX=3702 GN=CBR2 PE=1 SV=2	NADH-cytochrome b5 reductase OS=Rosa chinensis OX=74649 GN=RchiOBHm_Chr2g0089111 PE=3 SV=1	--	NADH-cytochrome b5 reductase-like protein [Fragaria vesca subsp. vesca]
							maker-Fvb1-3-snap-gene-17.86	1739308	1746132	-	Nucleotide transport and metabolism	Molecular Function: hydrolase activity (GO:0016787);; Molecular Function: metal ion binding (GO:0046872);	K03426	Replication, recombination and repair	Zinc finger C-x8-C-x5-C-x3-H type (and similar)	Nudix hydrolase 19, chloroplastic OS=Arabidopsis thaliana OX=3702 GN=NUDT19 PE=1 SV=1	Uncharacterized protein OS=Malus domestica OX=3750 GN=DVH24_017818 PE=4 SV=1	Replication, recombination and repair	hypothetical protein DVH24_017818 [Malus domestica]
							maker-Fvb1-3-snap-gene-17.88	1753700	1756666	-	--	--	--	--	--	--	--	--	uncharacterized protein LOC101307041 [Fragaria vesca subsp. vesca]
							maker-Fvb1-3-snap-gene-17.92	1769269	1771931	-	Signal transduction mechanisms	Molecular Function: protein kinase activity (GO:0004672);; Molecular Function: ATP binding (GO:0005524);; Cellular Component: integral component of membrane (GO:0016021);	K24104	--	Protein kinase domain	G-type lectin S-receptor-like serine/threonine-protein kinase At4g27290 OS=Arabidopsis thaliana OX=3702 GN=At4g27290 PE=3 SV=4	Uncharacterized protein OS=Rosa chinensis OX=74649 GN=RchiOBHm_Chr2g0089191 PE=4 SV=1	Signal transduction mechanisms	receptor-like serine/threonine-protein kinase SD1-8 [Rosa chinensis]
							maker-Fvb1-3-snap-gene-18.53	1790316	1793208	+
							maker-Fvb1-3-snap-gene-18.60	1789424	1789795	-
							maker-Fvb1-3-snap-gene-18.62	1804225	1805474	-	--	--	--	--	--	--	Putative kelch-type beta propeller OS=Rosa chinensis OX=74649 GN=RchiOBHm_Chr2g0090681 PE=4 SV=1	--	putative kelch-type beta propeller [Rosa chinensis]
							snap_masked-Fvb1-3-processed-gene-16.18	1592459	1597166	+	--	Biological Process: carbohydrate metabolic process (GO:0005975);; Molecular Function: carbohydrate binding (GO:0030246);; Molecular Function: rhamnogalacturonan endolyase activity (GO:0102210);	K18195	--	Rhamnogalacturonate lyase family	--	Rhamnogalacturonan endolyase OS=Fragaria chiloensis OX=101007 GN=RGL1 PE=2 SV=1	Function unknown	rhamnogalacturonan endolyase [Fragaria chiloensis]
							snap_masked-Fvb1-3-processed-gene-16.25	1672100	1672348	+
							snap_masked-Fvb1-3-processed-gene-16.26	1672504	1672704	+
							snap_masked-Fvb1-3-processed-gene-16.27	1674107	1676482	+	--	Biological Process: regulation of mitochondrial RNA catabolic process (GO:0000960);; Biological Process: positive regulation of mitochondrial RNA catabolic process (GO:0000962);; Molecular Function: molecular_function (GO:0003674);; Molecular Function: nucleic acid binding (GO:0003676);; Molecular Function: RNA binding (GO:0003723);; Molecular Function: catalytic activity (GO:0003824);; Molecular…	K22262	General function prediction only	PPR repeat family	Pentatricopeptide repeat-containing protein At4g32430, mitochondrial OS=Arabidopsis thaliana OX=3702 GN=PCMP-E40 PE=2 SV=1	Putative tetratricopeptide-like helical domain-containing protein OS=Rosa chinensis OX=74649 GN=RchiOBHm_Chr2g0088661 PE=4 SV=1	Function unknown	pentatricopeptide repeat-containing protein At4g32430, mitochondrial [Fragaria vesca subsp. vesca]
							snap_masked-Fvb1-3-processed-gene-16.29	1601686	1618635	-	--	Cellular Component: nuclear pore (GO:0005643);	K14310	Function unknown	Nuclear pore complex scaffold, nucleoporins 186/192/205	Nuclear pore complex protein NUP205 OS=Arabidopsis thaliana OX=3702 GN=NUP205 PE=1 SV=1	Putative nucleoporin Nup186/Nup192/Nup205 OS=Rosa chinensis OX=74649 GN=RchiOBHm_Chr2g0088511 PE=3 SV=1	Function unknown	nuclear pore complex protein NUP205 [Fragaria vesca subsp. vesca]
							snap_masked-Fvb1-3-processed-gene-16.31	1619852	1620178	-
							snap_masked-Fvb1-3-processed-gene-16.37	1649975	1654953	-	--	Molecular Function: metal ion binding (GO:0046872);	K23047	General function prediction only	Zinc finger C-x8-C-x5-C-x3-H type (and similar)	Zinc finger CCCH domain-containing protein 20 OS=Arabidopsis thaliana OX=3702 GN=At2g19810 PE=2 SV=1	Putative transcription factor C3H family OS=Rosa chinensis OX=74649 GN=RchiOBHm_Chr2g0092381 PE=4 SV=1	--	zinc finger CCCH domain-containing protein 49-like [Fragaria vesca subsp. vesca]
							snap_masked-Fvb1-3-processed-gene-17.29	1752017	1752542	+
							snap_masked-Fvb1-3-processed-gene-17.30	1756628	1756942	+
Fvb1-3	1830001	2080000	249999	50	0.305078	2.35114
							augustus_masked-Fvb1-3-processed-gene-19.1	1883277	1892340	-	Secondary metabolites biosynthesis, transport and catabolism	Biological Process: fatty acid biosynthetic process (GO:0006633);; Cellular Component: integral component of membrane (GO:0016021);; Molecular Function: transferase activity, transferring acyl groups other than amino-acyl groups (GO:0016747);	K15397	--	FAE1/Type III polyketide synthase-like protein	3-ketoacyl-CoA synthase 11 OS=Arabidopsis thaliana OX=3702 GN=KCS11 PE=1 SV=1	Very-long-chain 3-oxoacyl-CoA synthase OS=Malus domestica OX=3750 GN=DVH24_029220 PE=3 SV=1	Lipid transport and metabolism	hypothetical protein DVH24_029220 [Malus domestica]
							augustus_masked-Fvb1-3-processed-gene-19.2	1898205	1900028	-	--	Molecular Function: molecular_function (GO:0003674);; Molecular Function: nucleic acid binding (GO:0003676);; Molecular Function: RNA binding (GO:0003723);; Molecular Function: catalytic activity (GO:0003824);; Molecular Function: nuclease activity (GO:0004518);; Molecular Function: endonuclease activity (GO:0004519);; Molecular Function: binding (GO:0005488);; Cellular Component: cellular_compon…	K22651	General function prediction only	PPR repeat	Pentatricopeptide repeat-containing protein At1g31430 OS=Arabidopsis thaliana OX=3702 GN=PCMP-E55 PE=2 SV=1	Putative tetratricopeptide-like helical domain-containing protein OS=Rosa chinensis OX=74649 GN=RchiOBHm_Chr2g0089541 PE=4 SV=1	Replication, recombination and repair	pentatricopeptide repeat-containing protein At1g08070-like [Fragaria vesca subsp. vesca]
							augustus_masked-Fvb1-3-processed-gene-19.3	1906946	1908571	+	--	--	K14494	--	GRAS domain family	DELLA protein GAI1 OS=Vitis vinifera OX=29760 GN=GAI1 PE=2 SV=1	Putative transcription factor GRAS family OS=Rosa chinensis OX=74649 GN=RchiOBHm_Chr2g0089571 PE=3 SV=1	Transcription	DELLA protein GAI-like [Fragaria vesca subsp. vesca]
							augustus_masked-Fvb1-3-processed-gene-19.5	1926297	1928792	+	--	Biological Process: RNA modification (GO:0009451);; Cellular Component: intracellular membrane-bounded organelle (GO:0043231);	K22262	General function prediction only	PPR repeat family	Pentatricopeptide repeat-containing protein At5g55740, chloroplastic OS=Arabidopsis thaliana OX=3702 GN=CRR21 PE=2 SV=1	Uncharacterized protein OS=Prunus persica OX=3760 GN=PRUPE_7G235800 PE=4 SV=1	Function unknown	pentatricopeptide repeat-containing protein At5g55740, chloroplastic [Fragaria vesca subsp. vesca]
							augustus_masked-Fvb1-3-processed-gene-19.8	1949711	1959287	+	--	Cellular Component: protein phosphatase type 2A complex (GO:0000159);; Cellular Component: nucleus (GO:0005634);; Biological Process: auxin-activated signaling pathway (GO:0009734);; Molecular Function: protein phosphatase regulator activity (GO:0019888);	K11584	Signal transduction mechanisms	Protein phosphatase 2A regulatory B subunit (B56 family)	Serine/threonine protein phosphatase 2A 57 kDa regulatory subunit B' kappa isoform OS=Arabidopsis thaliana OX=3702 GN=B'KAPPA PE=1 SV=1	Serine/threonine protein phosphatase 2A regulatory subunit OS=Malus domestica OX=3750 GN=DVH24_029238 PE=3 SV=1	Signal transduction mechanisms	hypothetical protein DVH24_029238 [Malus domestica]
							augustus_masked-Fvb1-3-processed-gene-20.4	2029443	2029763	+
							augustus_masked-Fvb1-3-processed-gene-20.5	2037795	2038743	+	--	Molecular Function: molecular_function (GO:0003674);; Molecular Function: nucleic acid binding (GO:0003676);; Molecular Function: RNA binding (GO:0003723);; Molecular Function: catalytic activity (GO:0003824);; Molecular Function: nuclease activity (GO:0004518);; Molecular Function: endonuclease activity (GO:0004519);; Molecular Function: binding (GO:0005488);; Cellular Component: cellular_compon…	K17710	General function prediction only	PPR repeat family	--	Putative tetratricopeptide-like helical domain-containing protein OS=Rosa chinensis OX=74649 GN=RchiOBHm_Chr2g0090251 PE=4 SV=1	Function unknown	pentatricopeptide repeat-containing protein At5g21222-like isoform X2 [Fragaria vesca subsp. vesca]
							augustus_masked-Fvb1-3-processed-gene-20.9	2064566	2064910	+	--	--	K05019	--	--	F-box protein PP2-B7 OS=Arabidopsis thaliana OX=3702 GN=PP2B7 PE=2 SV=1	Putative phloem protein OS=Rosa chinensis OX=74649 GN=RchiOBHm_Chr2g0090041 PE=4 SV=1	--	F-box protein At2g02240-like [Fragaria vesca subsp. vesca]
							maker-Fvb1-3-augustus-gene-18.40	1839945	1841850	+	--	Cellular Component: integral component of membrane (GO:0016021);	--	--	--	--	Uncharacterized protein OS=Rosa chinensis OX=74649 GN=RchiOBHm_Chr2g0089401 PE=4 SV=1	--	uncharacterized protein LOC101311024 [Fragaria vesca subsp. vesca]
							maker-Fvb1-3-augustus-gene-18.41	1853518	1860632	+	Signal transduction mechanisms	Molecular Function: voltage-gated potassium channel activity (GO:0005249);; Cellular Component: integral component of membrane (GO:0016021);; Biological Process: regulation of ion transmembrane transport (GO:0034765);	K21867	--	Ion transport protein	Potassium channel AKT1 OS=Arabidopsis thaliana OX=3702 GN=AKT1 PE=1 SV=2	Putative potassium channel, voltage-dependent, EAG/ELK/ERG OS=Rosa chinensis OX=74649 GN=RchiOBHm_Chr2g0089421 PE=3 SV=1	--	potassium channel AKT1 [Fragaria vesca subsp. vesca]
							maker-Fvb1-3-augustus-gene-18.42	1879714	1882850	+	Cell wall/membrane/envelope biogenesis	Molecular Function: protein binding (GO:0005515);; Biological Process: biological_process (GO:0008150);; Biological Process: regulation of signal transduction (GO:0009966);; Biological Process: negative regulation of signal transduction (GO:0009968);; Biological Process: regulation of cell communication (GO:0010646);; Biological Process: negative regulation of cell communication (GO:0010648);; Bi…	K13137	Lipid transport and metabolism	WD domain, G-beta repeat	--	Putative transcription factor WD40-like family OS=Rosa chinensis OX=74649 GN=RchiOBHm_Chr2g0089471 PE=4 SV=1	Lipid transport and metabolism	serine-threonine kinase receptor-associated protein [Fragaria vesca subsp. vesca]
							maker-Fvb1-3-augustus-gene-18.43	1883221	1887411	+	--	Cellular Component: nucleosome (GO:0000786);; Molecular Function: DNA binding (GO:0003677);; Cellular Component: nucleus (GO:0005634);; Molecular Function: protein heterodimerization activity (GO:0046982);	K11251	Chromatin structure and dynamics	Core histone H2A/H2B/H3/H4	Probable histone H2A variant 3 OS=Arabidopsis thaliana OX=3702 GN=At1g52740 PE=1 SV=1	Histone H2A OS=Rosa chinensis OX=74649 GN=RchiOBHm_Chr2g0089481 PE=3 SV=1	Chromatin structure and dynamics	probable histone H2A variant 3 [Fragaria vesca subsp. vesca]
							maker-Fvb1-3-augustus-gene-18.47	1836255	1839168	-	Transcription	Molecular Function: GTPase activity (GO:0003924);; Molecular Function: GTP binding (GO:0005525);; Cellular Component: nucleus (GO:0005634);; Biological Process: nucleocytoplasmic transport (GO:0006913);; Biological Process: protein transport (GO:0015031);; Molecular Function: lyase activity (GO:0016829);	K07936	Intracellular trafficking, secretion, and vesicular transport	Ras family	GTP-binding nuclear protein Ran-2 OS=Arabidopsis thaliana OX=3702 GN=RAN2 PE=1 SV=3	GTP-binding nuclear protein OS=Rosa chinensis OX=74649 GN=RchiOBHm_Chr2g0089391 PE=3 SV=1	Intracellular trafficking, secretion, and vesicular transport	GTP-binding nuclear protein Ran-3-like [Fragaria vesca subsp. vesca]
							maker-Fvb1-3-augustus-gene-18.48	1858820	1863212	-	--	Molecular Function: zinc ion binding (GO:0008270);; Cellular Component: integral component of membrane (GO:0016021);	--	RNA processing and modification	RING-variant domain	--	Putative E3 ubiquitin-protein ligase MARCH OS=Rosa chinensis OX=74649 GN=RchiOBHm_Chr2g0089431 PE=4 SV=1	RNA processing and modification	uncharacterized protein LOC101311791 [Fragaria vesca subsp. vesca]
							maker-Fvb1-3-augustus-gene-18.49	1873951	1878971	-	--	--	K14771	--	Lytic transglycolase	--	Putative rlpA-like protein, double-psi beta-barrel OS=Rosa chinensis OX=74649 GN=RchiOBHm_Chr2g0089451 PE=4 SV=1	Function unknown	EG45-like domain containing protein [Fragaria vesca subsp. vesca]
							maker-Fvb1-3-augustus-gene-19.41	1938096	1946751	+	--	Biological Process: reproduction (GO:0000003);; Biological Process: response to acid chemical (GO:0001101);; Biological Process: regulation of cell growth (GO:0001558);; Biological Process: response to hypoxia (GO:0001666);; Biological Process: regionalization (GO:0003002);; Biological Process: developmental process involved in reproduction (GO:0003006);; Molecular Function: protein binding (GO:0…	--	General function prediction only	LisH	Transcriptional corepressor LEUNIG OS=Arabidopsis thaliana OX=3702 GN=LUG PE=1 SV=2	Putative transcription factor WD40-like family OS=Rosa chinensis OX=74649 GN=RchiOBHm_Chr2g0089671 PE=4 SV=1	Function unknown	transcriptional corepressor LEUNIG-like isoform X1 [Fragaria vesca subsp. vesca]
							maker-Fvb1-3-augustus-gene-19.42	1947810	1948903	+	Lipid transport and metabolism	Biological Process: fatty acid biosynthetic process (GO:0006633);; Cellular Component: chloroplast (GO:0009507);; Molecular Function: thiolester hydrolase activity (GO:0016790);	K10781	--	Acyl-ACP thioesterase	Palmitoyl-acyl carrier protein thioesterase, chloroplastic OS=Gossypium hirsutum OX=3635 GN=FATB1 PE=1 SV=1	Acyl-[acyl-carrier-protein] hydrolase OS=Rosa chinensis OX=74649 GN=RchiOBHm_Chr2g0089811 PE=3 SV=1	Lipid transport and metabolism	palmitoyl-acyl carrier protein thioesterase, chloroplastic [Fragaria vesca subsp. vesca]
							maker-Fvb1-3-augustus-gene-19.45	1968368	1969492	+	--	Biological Process: reproduction (GO:0000003);; Biological Process: response to acid chemical (GO:0001101);; Biological Process: regulation of cell growth (GO:0001558);; Biological Process: response to hypoxia (GO:0001666);; Biological Process: regionalization (GO:0003002);; Biological Process: developmental process involved in reproduction (GO:0003006);; Biological Process: carbohydrate metaboli…	K14963	General function prediction only	--	Transcriptional corepressor LEUNIG OS=Arabidopsis thaliana OX=3702 GN=LUG PE=1 SV=2	Putative transcription factor WD40-like family OS=Rosa chinensis OX=74649 GN=RchiOBHm_Chr2g0089711 PE=4 SV=1	Function unknown	transcriptional corepressor LEUNIG-like [Rosa chinensis]
							maker-Fvb1-3-augustus-gene-19.47	1917558	1920426	-	--	Molecular Function: DNA binding (GO:0003677);; Cellular Component: nucleus (GO:0005634);	K14491	--	Myb-like DNA-binding domain	Myb family transcription factor EFM OS=Arabidopsis thaliana OX=3702 GN=EFM PE=1 SV=2	Putative transcription factor MYB-HB-like family OS=Rosa chinensis OX=74649 GN=RchiOBHm_Chr2g0089601 PE=4 SV=1	Transcription	uncharacterized protein LOC101303940 [Fragaria vesca subsp. vesca]
							maker-Fvb1-3-augustus-gene-19.48	1931325	1934533	-	Cell wall/membrane/envelope biogenesis	Molecular Function: protein kinase activity (GO:0004672);; Molecular Function: ATP binding (GO:0005524);; Cellular Component: integral component of membrane (GO:0016021);	K20359	--	Protein kinase domain	Probable inactive receptor kinase At2g26730 OS=Arabidopsis thaliana OX=3702 GN=At2g26730 PE=1 SV=1	Protein kinase domain-containing protein OS=Rosa chinensis OX=74649 GN=RchiOBHm_Chr2g0089641 PE=4 SV=1	Signal transduction mechanisms	probable inactive receptor kinase At2g26730 [Fragaria vesca subsp. vesca]
							maker-Fvb1-3-augustus-gene-19.51	1972487	1975549	-	Signal transduction mechanisms	Molecular Function: ATP binding (GO:0005524);; Molecular Function: ATPase-coupled sulfate transmembrane transporter activity (GO:0015419);; Cellular Component: integral component of membrane (GO:0016021);; Molecular Function: ATPase activity (GO:0016887);	K08712	Secondary metabolites biosynthesis, transport and catabolism	ABC-2 type transporter	ABC transporter G family member 32 OS=Arabidopsis thaliana OX=3702 GN=ABCG32 PE=1 SV=1	Putative sulfate-transporting ATPase OS=Rosa chinensis OX=74649 GN=RchiOBHm_Chr2g0089741 PE=3 SV=1	Secondary metabolites biosynthesis, transport and catabolism	ABC transporter G family member 32 isoform X1 [Fragaria vesca subsp. vesca]
							maker-Fvb1-3-augustus-gene-19.52	1976551	1979911	-	General function prediction only	Biological Process: reproduction (GO:0000003);; Biological Process: response to acid chemical (GO:0001101);; Biological Process: regulation of cell growth (GO:0001558);; Biological Process: response to hypoxia (GO:0001666);; Biological Process: regionalization (GO:0003002);; Biological Process: developmental process involved in reproduction (GO:0003006);; Molecular Function: protein binding (GO:0…	K14963	General function prediction only	WD domain, G-beta repeat	Transcriptional corepressor LEUNIG OS=Arabidopsis thaliana OX=3702 GN=LUG PE=1 SV=2	Uncharacterized protein OS=Prunus persica OX=3760 GN=PRUPE_7G235500 PE=4 SV=1	Function unknown	transcriptional corepressor LEUNIG-like isoform X2 [Fragaria vesca subsp. vesca]
							maker-Fvb1-3-augustus-gene-19.53	1980935	1984148	-	Lipid transport and metabolism	Biological Process: fatty acid biosynthetic process (GO:0006633);; Cellular Component: chloroplast (GO:0009507);; Molecular Function: thiolester hydrolase activity (GO:0016790);	K10781	--	Acyl-ACP thioesterase	Palmitoyl-acyl carrier protein thioesterase, chloroplastic OS=Arabidopsis thaliana OX=3702 GN=FATB PE=1 SV=1	Acyl-[acyl-carrier-protein] hydrolase OS=Rosa chinensis OX=74649 GN=RchiOBHm_Chr2g0089811 PE=3 SV=1	Lipid transport and metabolism	palmitoyl-acyl carrier protein thioesterase, chloroplastic [Fragaria vesca subsp. vesca]
							maker-Fvb1-3-augustus-gene-20.46	2046537	2048051	+	Lipid transport and metabolism	Cellular Component: endoplasmic reticulum membrane (GO:0005789);; Biological Process: fatty acid biosynthetic process (GO:0006633);; Molecular Function: 16:0 monogalactosyldiacylglycerol desaturase activity (GO:0009979);; Cellular Component: integral component of membrane (GO:0016021);; Molecular Function: oxidoreductase activity, acting on paired donors, with oxidation of a pair of donors result…	K20416	Lipid transport and metabolism	Fatty acid desaturase	Probable lipid desaturase ADS3.2, chloroplastic OS=Arabidopsis thaliana OX=3702 GN=ADS3.2 PE=2 SV=3	FA_desaturase domain-containing protein OS=Prunus persica OX=3760 GN=PRUPE_4G259100 PE=3 SV=1	Lipid transport and metabolism	palmitoyl-monogalactosyldiacylglycerol delta-7 desaturase, chloroplastic-like [Fragaria vesca subsp. vesca]
							maker-Fvb1-3-augustus-gene-20.48	2061524	2064328	+	--	Molecular Function: Rho guanyl-nucleotide exchange factor activity (GO:0005089);	--	--	PRONE (Plant-specific Rop nucleotide exchanger)	Rho guanine nucleotide exchange factor 8 OS=Arabidopsis thaliana OX=3702 GN=ROPGEF8 PE=1 SV=1	Putative PRONE domain-containing protein OS=Rosa chinensis OX=74649 GN=RchiOBHm_Chr2g0090051 PE=4 SV=1	Cytoskeleton	rop guanine nucleotide exchange factor 9-like [Fragaria vesca subsp. vesca]
							maker-Fvb1-3-augustus-gene-20.52	2037685	2041560	-	--	Cellular Component: integral component of membrane (GO:0016021);	--	--	Late embryogenesis abundant protein	--	Putative Late embryogenesis abundant protein, LEA-14 OS=Rosa chinensis OX=74649 GN=RchiOBHm_Chr2g0090181 PE=4 SV=1	Function unknown	uncharacterized protein LOC101296029 [Fragaria vesca subsp. vesca]
							maker-Fvb1-3-augustus-gene-20.53	2044780	2046243	-
							maker-Fvb1-3-augustus-gene-20.54	2054344	2058545	-	--	--	--	--	Domain of unknown function (DUF4378)	--	DUF4378 domain-containing protein OS=Rosa chinensis OX=74649 GN=RchiOBHm_Chr2g0090061 PE=4 SV=1	--	uncharacterized protein LOC101295266 [Fragaria vesca subsp. vesca]
							maker-Fvb1-3-snap-gene-19.54	1914035	1917504	+	Translation, ribosomal structure and biogenesis	Molecular Function: RNA binding (GO:0003723);	K13195	General function prediction only	RNA recognition motif. (a.k.a. RRM, RBD, or RNP domain)	Glycine-rich RNA-binding protein 8 OS=Arabidopsis thaliana OX=3702 GN=RBG8 PE=1 SV=1	Putative RNA recognition motif domain, nucleotide-binding alpha-beta plait domain-containing protein OS=Rosa chinensis OX=74649 GN=RchiOBHm_Chr2g0089591 PE=4 SV=1	RNA processing and modification	glycine-rich RNA-binding protein RZ1B [Fragaria vesca subsp. vesca]
							maker-Fvb1-3-snap-gene-19.66	1958183	1963444	-	Function unknown	Cellular Component: integral component of membrane (GO:0016021);	--	Function unknown	Integral membrane protein DUF92	Protein PGR OS=Arabidopsis thaliana OX=3702 GN=PGR PE=2 SV=1	Uncharacterized protein OS=Rosa chinensis OX=74649 GN=RchiOBHm_Chr2g0089771 PE=3 SV=1	Function unknown	transmembrane protein 19-like isoform X2 [Fragaria vesca subsp. vesca]
							maker-Fvb1-3-snap-gene-19.67	1970235	1971417	-	Secondary metabolites biosynthesis, transport and catabolism	Molecular Function: oxidoreductase activity (GO:0016491);; Molecular Function: metal ion binding (GO:0046872);	K04124	--	2OG-Fe(II) oxygenase superfamily	Gibberellin 3-beta-dioxygenase 1 OS=Pisum sativum OX=3888 GN=LE PE=1 SV=1	PREDICTED: gibberellin OS=Prunus dulcis OX=3755 GN=ALMOND_2B009467 PE=3 SV=1	Secondary metabolites biosynthesis, transport and catabolism	gibberellin 3-beta-dioxygenase 1-like [Fragaria vesca subsp. vesca]
							maker-Fvb1-3-snap-gene-20.57	2005122	2007230	+	--	Molecular Function: ATP binding (GO:0005524);; Molecular Function: ATPase-coupled sulfate transmembrane transporter activity (GO:0015419);; Cellular Component: integral component of membrane (GO:0016021);; Molecular Function: ATPase activity (GO:0016887);	--	Secondary metabolites biosynthesis, transport and catabolism	ABC-2 type transporter	ABC transporter G family member 32 OS=Arabidopsis thaliana OX=3702 GN=ABCG32 PE=1 SV=1	Putative sulfate-transporting ATPase OS=Rosa chinensis OX=74649 GN=RchiOBHm_Chr2g0089741 PE=3 SV=1	Secondary metabolites biosynthesis, transport and catabolism	ABC transporter G family member 32 isoform X1 [Fragaria vesca subsp. vesca]
							maker-Fvb1-3-snap-gene-20.58	2010686	2015501	+	--	Molecular Function: microtubule motor activity (GO:0003777);; Molecular Function: ATP binding (GO:0005524);; Cellular Component: microtubule (GO:0005874);; Biological Process: microtubule-based movement (GO:0007018);; Molecular Function: microtubule binding (GO:0008017);	K10393	Cytoskeleton	Kinesin motor domain	Kinesin-like protein KIN-13B OS=Arabidopsis thaliana OX=3702 GN=KIN13B PE=1 SV=1	Kinesin-like protein OS=Rosa chinensis OX=74649 GN=RchiOBHm_Chr2g0090451 PE=3 SV=1	Cytoskeleton	kinesin-13A-like [Fragaria vesca subsp. vesca]
							maker-Fvb1-3-snap-gene-20.59	2017271	2018770	+	--	Molecular Function: DNA-binding transcription factor activity (GO:0003700);; Cellular Component: nucleus (GO:0005634);; Cellular Component: host cell nucleus (GO:0042025);; Molecular Function: sequence-specific DNA binding (GO:0043565);	K09419	Transcription	HSF-type DNA-binding	Heat stress transcription factor C-1 OS=Arabidopsis thaliana OX=3702 GN=HSFC1 PE=1 SV=1	Heat shock factor C1a OS=Fragaria vesca OX=57918 PE=2 SV=1	Transcription	heat stress transcription factor C-1 [Fragaria vesca subsp. vesca]
							maker-Fvb1-3-snap-gene-20.63	2052929	2054098	+	--	Molecular Function: motor activity (GO:0003774);; Cellular Component: cytoplasm (GO:0005737);; Cellular Component: microtubule (GO:0005874);; Biological Process: microtubule-based process (GO:0007017);; Cellular Component: dynein complex (GO:0030286);	K10418	Cytoskeleton	Dynein light chain type 1	--	Dynein light chain OS=Rosa chinensis OX=74649 GN=RchiOBHm_Chr2g0090071 PE=3 SV=1	Cytoskeleton	dynein light chain 1, cytoplasmic-like [Fragaria vesca subsp. vesca]
							maker-Fvb1-3-snap-gene-20.69	2029760	2037621	-	--	Molecular Function: molecular_function (GO:0003674);; Molecular Function: nucleic acid binding (GO:0003676);; Molecular Function: RNA binding (GO:0003723);; Molecular Function: catalytic activity (GO:0003824);; Molecular Function: nuclease activity (GO:0004518);; Molecular Function: endonuclease activity (GO:0004519);; Molecular Function: binding (GO:0005488);; Cellular Component: cellular_compon…	K17710	General function prediction only	PPR repeat family	Pentatricopeptide repeat-containing protein At5g21222 OS=Arabidopsis thaliana OX=3702 GN=ATC401 PE=2 SV=1	Putative tetratricopeptide-like helical domain-containing protein OS=Rosa chinensis OX=74649 GN=RchiOBHm_Chr2g0090251 PE=4 SV=1	Function unknown	pentatricopeptide repeat-containing protein At5g21222-like isoform X2 [Fragaria vesca subsp. vesca]
							maker-Fvb1-3-snap-gene-20.71	2051367	2052480	-	--	--	K09250	--	--	--	--	--	uncharacterized protein LOC105353226 [Fragaria vesca subsp. vesca]
							maker-Fvb1-3-snap-gene-20.74	2067996	2073558	-	--	--	--	--	--	--	Uncharacterized protein OS=Rosa chinensis OX=74649 GN=RchiOBHm_Chr2g0090011 PE=4 SV=1	--	protein NUCLEAR FUSION DEFECTIVE 6, chloroplastic/mitochondrial [Fragaria vesca subsp. vesca]
							snap_masked-Fvb1-3-processed-gene-18.33	1842438	1842788	-	--	--	--	--	--	--	Uncharacterized protein OS=Rosa chinensis OX=74649 GN=RchiOBHm_Chr2g0089411 PE=4 SV=1	--	uncharacterized protein LOC105349702 [Fragaria vesca subsp. vesca]
							snap_masked-Fvb1-3-processed-gene-19.15	1895241	1895474	+	--	--	--	--	--	--	Uncharacterized protein OS=Rosa chinensis OX=74649 GN=RchiOBHm_Chr2g0089511 PE=4 SV=1	--	hypothetical protein RchiOBHm_Chr2g0089511 [Rosa chinensis]
							snap_masked-Fvb1-3-processed-gene-19.16	1897499	1897681	+	--	--	--	--	--	--	Uncharacterized protein OS=Rosa chinensis OX=74649 GN=RchiOBHm_Chr2g0089531 PE=4 SV=1	--	hypothetical protein RchiOBHm_Chr2g0089531 [Rosa chinensis]
							snap_masked-Fvb1-3-processed-gene-19.23	1933442	1933726	+	--	--	--	--	--	--	Uncharacterized protein OS=Lupinus albus OX=3870 GN=Lal_00040971 PE=4 SV=1	--	hypothetical protein Lal_00040971 [Lupinus albus]
							snap_masked-Fvb1-3-processed-gene-19.31	1972955	1973155	+
							snap_masked-Fvb1-3-processed-gene-20.22	2026267	2029157	+	Inorganic ion transport and metabolism	Molecular Function: N,N-dimethylaniline monooxygenase activity (GO:0004499);; Molecular Function: flavin adenine dinucleotide binding (GO:0050660);; Molecular Function: NADP binding (GO:0050661);	K11816	Secondary metabolites biosynthesis, transport and catabolism	Flavin-binding monooxygenase-like	Indole-3-pyruvate monooxygenase YUCCA2 OS=Arabidopsis thaliana OX=3702 GN=YUC2 PE=1 SV=1	Flavin-containing monooxygenase OS=Rosa chinensis OX=74649 GN=RchiOBHm_Chr2g0090431 PE=3 SV=1	Secondary metabolites biosynthesis, transport and catabolism	indole-3-pyruvate monooxygenase YUCCA2-like [Rosa chinensis]
							snap_masked-Fvb1-3-processed-gene-20.24	2036251	2036472	+
							snap_masked-Fvb1-3-processed-gene-20.27	2049427	2049705	+	--	Molecular Function: ATP binding (GO:0005524);; Molecular Function: ATPase-coupled sulfate transmembrane transporter activity (GO:0015419);; Cellular Component: integral component of membrane (GO:0016021);; Molecular Function: ATPase activity (GO:0016887);	--	Secondary metabolites biosynthesis, transport and catabolism	--	ABC transporter G family member 32 OS=Arabidopsis thaliana OX=3702 GN=ABCG32 PE=1 SV=1	Putative sulfate-transporting ATPase OS=Rosa chinensis OX=74649 GN=RchiOBHm_Chr2g0089741 PE=3 SV=1	Secondary metabolites biosynthesis, transport and catabolism	ABC transporter G family member 32 isoform X1 [Fragaria vesca subsp. vesca]
							snap_masked-Fvb1-3-processed-gene-20.31	2064921	2065316	+	--	Cellular Component: integral component of membrane (GO:0016021);	K03188	--	Phloem protein 2	F-box protein PP2-B10 OS=Arabidopsis thaliana OX=3702 GN=PP2B10 PE=1 SV=1	Putative phloem protein OS=Rosa chinensis OX=74649 GN=RchiOBHm_Chr3g0448471 PE=4 SV=1	--	F-box protein At2g02240-like [Fragaria vesca subsp. vesca]
							snap_masked-Fvb1-3-processed-gene-20.35	2002130	2010064	-	--	--	K09533	--	--	DnaJ homolog subfamily C GRV2 OS=Arabidopsis thaliana OX=3702 GN=GRV2 PE=1 SV=1	Putative DnaJ domain-containing protein OS=Rosa chinensis OX=74649 GN=RchiOBHm_Chr2g0089861 PE=4 SV=1	--	dnaJ homolog subfamily C GRV2 [Fragaria vesca subsp. vesca]
							snap_masked-Fvb1-3-processed-gene-20.39	2065586	2067495	-	--	--	--	--	--	--	Putative ABI family protein OS=Rosa chinensis OX=74649 GN=RchiOBHm_Chr2g0090031 PE=3 SV=1	Function unknown	probable protein ABIL5 [Fragaria vesca subsp. vesca]
							snap_masked-Fvb1-3-processed-gene-20.41	2074421	2074615	-	--	--	K09250	--	--	--	--	--	uncharacterized protein LOC105353226 [Fragaria vesca subsp. vesca]
Fvb1-3	2100001	2270000	169999	34	0.289784	2.49741
							augustus_masked-Fvb1-3-processed-gene-21.9	2175532	2175951	+
							augustus_masked-Fvb1-3-processed-gene-22.13	2226257	2226577	-
							augustus_masked-Fvb1-3-processed-gene-22.16	2238684	2243491	-	--	Molecular Function: microtubule motor activity (GO:0003777);; Molecular Function: ATP binding (GO:0005524);; Cellular Component: microtubule (GO:0005874);; Biological Process: microtubule-based movement (GO:0007018);; Molecular Function: microtubule binding (GO:0008017);	K10393	Cytoskeleton	Kinesin motor domain	Kinesin-like protein KIN-13B OS=Arabidopsis thaliana OX=3702 GN=KIN13B PE=1 SV=1	Kinesin-like protein OS=Rosa chinensis OX=74649 GN=RchiOBHm_Chr2g0090451 PE=3 SV=1	Cytoskeleton	kinesin-13A-like [Fragaria vesca subsp. vesca]
							augustus_masked-Fvb1-3-processed-gene-22.6	2210071	2210976	+	--	Cellular Component: nucleus (GO:0005634);; Biological Process: negative regulation of transcription, DNA-templated (GO:0045892);	K01870	--	Transcriptional repressor, ovate	Transcription repressor OFP8 OS=Arabidopsis thaliana OX=3702 GN=OFP8 PE=1 SV=1	Transcription repressor OS=Rosa chinensis OX=74649 GN=RchiOBHm_Chr2g0090371 PE=4 SV=1	Function unknown	transcription repressor OFP8 [Fragaria vesca subsp. vesca]
							maker-Fvb1-3-augustus-gene-21.41	2119708	2125296	+	Carbohydrate transport and metabolism	Biological Process: carbohydrate transport (GO:0008643);; Cellular Component: integral component of membrane (GO:0016021);; Molecular Function: transmembrane transporter activity (GO:0022857);	K03444	General function prediction only	Sugar (and other) transporter	Probable plastidic glucose transporter 2 OS=Arabidopsis thaliana OX=3702 GN=At1g67300 PE=2 SV=1	Putative major facilitator, sugar transporter, major facilitator superfamily OS=Rosa chinensis OX=74649 GN=RchiOBHm_Chr2g0089961 PE=3 SV=1	Intracellular trafficking, secretion, and vesicular transport	probable plastidic glucose transporter 2 [Fragaria vesca subsp. vesca]
							maker-Fvb1-3-augustus-gene-21.43	2127236	2134007	+	--	--	K09533	--	GYF domain 2	DnaJ homolog subfamily C GRV2 OS=Arabidopsis thaliana OX=3702 GN=GRV2 PE=1 SV=1	Putative DnaJ domain-containing protein OS=Rosa chinensis OX=74649 GN=RchiOBHm_Chr2g0089861 PE=4 SV=1	--	dnaJ homolog subfamily C GRV2 [Fragaria vesca subsp. vesca]
							maker-Fvb1-3-augustus-gene-21.44	2137775	2139883	+	--	--	--	--	Root cap	--	Uncharacterized protein OS=Rosa chinensis OX=74649 GN=RchiOBHm_Chr5g0054971 PE=4 SV=1	Function unknown	uncharacterized protein LOC101291021 [Fragaria vesca subsp. vesca]
							maker-Fvb1-3-augustus-gene-21.45	2149246	2149955	+	Lipid transport and metabolism	Molecular Function: 3-oxolaurate decarboxylase activity (GO:0050410);; Molecular Function: 3-oxo-myristate decarboxylase activity (GO:0102151);; Molecular Function: 3-oxo-palmitate decarboxylase activity (GO:0102577);	K20802	--	Alpha/beta hydrolase family	Methylesterase 3 OS=Arabidopsis thaliana OX=3702 GN=MES3 PE=2 SV=1	Putative 3-oxolaurate decarboxylase OS=Rosa chinensis OX=74649 GN=RchiOBHm_Chr1g0329951 PE=4 SV=1	Function unknown	methylesterase 3-like [Fragaria vesca subsp. vesca]
							maker-Fvb1-3-augustus-gene-21.46	2151532	2153769	+	--	Cellular Component: integral component of membrane (GO:0016021);	K13348	General function prediction only	Mpv17 / PMP22 family	--	Uncharacterized protein OS=Rosa chinensis OX=74649 GN=RchiOBHm_Chr2g0090261 PE=3 SV=1	Function unknown	PXMP2/4 family protein 2 [Fragaria vesca subsp. vesca]
							maker-Fvb1-3-augustus-gene-21.47	2161848	2163170	+
							maker-Fvb1-3-augustus-gene-21.48	2166927	2174089	+	Posttranslational modification, protein turnover, chaperones	Molecular Function: serine-type endopeptidase activity (GO:0004252);; Cellular Component: integral component of membrane (GO:0016021);	K08653	Posttranslational modification, protein turnover, chaperones	Subtilase family	Subtilisin-like protease SBT6.1 OS=Arabidopsis thaliana OX=3702 GN=SBT6.1 PE=1 SV=1	Putative site-1 protease OS=Rosa chinensis OX=74649 GN=RchiOBHm_Chr2g0090281 PE=3 SV=1	Posttranslational modification, protein turnover, chaperones	membrane-bound transcription factor site-1 protease [Fragaria vesca subsp. vesca]
							maker-Fvb1-3-augustus-gene-21.52	2106718	2111688	-	--	Molecular Function: RNA binding (GO:0003723);; Biological Process: regulation of transcription, DNA-templated (GO:0006355);; Molecular Function: metal ion binding (GO:0046872);	K13209	--	--	--	Putative Zinc finger, RanBP2-type OS=Rosa chinensis OX=74649 GN=RchiOBHm_Chr2g0089981 PE=4 SV=1	Function unknown	uncharacterized protein LOC101293710 isoform X2 [Fragaria vesca subsp. vesca]
							maker-Fvb1-3-augustus-gene-22.46	2184400	2187725	+	--	Molecular Function: ATP binding (GO:0005524);; Molecular Function: hydrolase activity (GO:0016787);	--	Posttranslational modification, protein turnover, chaperones	Ankyrin repeats (3 copies)	Ribulose bisphosphate carboxylase/oxygenase activase, chloroplastic OS=Cyanidioschyzon merolae (strain 10D) OX=280699 GN=Rca PE=1 SV=2	Putative ankyrin repeat-containing domain, P-loop containing nucleoside triphosphate hydrolase OS=Rosa chinensis OX=74649 GN=RchiOBHm_Chr2g0090311 PE=4 SV=1	--	transitional endoplasmic reticulum ATPase homolog 2 [Fragaria vesca subsp. vesca]
							maker-Fvb1-3-augustus-gene-22.52	2245334	2249046	+	--	Molecular Function: ubiquitin activating enzyme activity (GO:0004839);; Molecular Function: ATP binding (GO:0005524);; Molecular Function: transferase activity, transferring acyl groups (GO:0016746);	K13960	Posttranslational modification, protein turnover, chaperones	Ubiquitin-conjugating enzyme	Probable ubiquitin-conjugating enzyme E2 37 OS=Arabidopsis thaliana OX=3702 GN=UBC37 PE=2 SV=2	Putative aminoacyltransferase, E1 ubiquitin-activating enzyme OS=Rosa chinensis OX=74649 GN=RchiOBHm_Chr2g0090471 PE=4 SV=1	Posttranslational modification, protein turnover, chaperones	uncharacterized protein LOC101299224 [Fragaria vesca subsp. vesca]
							maker-Fvb1-3-augustus-gene-22.54	2254365	2256362	+	--	--	--	--	--	--	Uncharacterized protein OS=Rosa chinensis OX=74649 GN=RchiOBHm_Chr2g0090511 PE=4 SV=1	--	hypothetical protein RchiOBHm_Chr2g0090511 [Rosa chinensis]
							maker-Fvb1-3-augustus-gene-22.57	2227261	2229522	-	Inorganic ion transport and metabolism	Molecular Function: N,N-dimethylaniline monooxygenase activity (GO:0004499);; Molecular Function: flavin adenine dinucleotide binding (GO:0050660);; Molecular Function: NADP binding (GO:0050661);	K11816	Secondary metabolites biosynthesis, transport and catabolism	Flavin-binding monooxygenase-like	Indole-3-pyruvate monooxygenase YUCCA2 OS=Arabidopsis thaliana OX=3702 GN=YUC2 PE=1 SV=1	Flavin-containing monooxygenase OS=Rosa chinensis OX=74649 GN=RchiOBHm_Chr2g0090431 PE=3 SV=1	Secondary metabolites biosynthesis, transport and catabolism	indole-3-pyruvate monooxygenase YUCCA2-like [Rosa chinensis]
							maker-Fvb1-3-augustus-gene-22.60	2249076	2252341	-	--	Molecular Function: protein kinase activity (GO:0004672);; Molecular Function: ATP binding (GO:0005524);	K24104	--	Protein tyrosine and serine/threonine kinase	G-type lectin S-receptor-like serine/threonine-protein kinase B120 OS=Arabidopsis thaliana OX=3702 GN=B120 PE=2 SV=1	Uncharacterized protein OS=Rosa chinensis OX=74649 GN=RchiOBHm_Chr2g0090491 PE=4 SV=1	Signal transduction mechanisms	G-type lectin S-receptor-like serine/threonine-protein kinase At1g11330 [Fragaria vesca subsp. vesca]
							maker-Fvb1-3-snap-gene-21.68	2100458	2106147	-	--	Molecular Function: molecular_function (GO:0003674);; Molecular Function: DNA-binding transcription factor activity (GO:0003700);; Biological Process: regulation of transcription, DNA-templated (GO:0006355);; Biological Process: biological_process (GO:0008150);; Biological Process: regulation of biosynthetic process (GO:0009889);; Biological Process: regulation of gene expression (GO:0010468);; B…	--	Inorganic ion transport and metabolism	Tesmin/TSO1-like CXC domain, cysteine-rich domain	Protein tesmin/TSO1-like CXC 5 OS=Arabidopsis thaliana OX=3702 GN=TCX5 PE=1 SV=1	Putative transcription factor Tesmin family OS=Rosa chinensis OX=74649 GN=RchiOBHm_Chr2g0089991 PE=3 SV=1	Inorganic ion transport and metabolism	protein tesmin/TSO1-like CXC 5 isoform X1 [Rosa chinensis]
							maker-Fvb1-3-snap-gene-21.72	2153901	2157564	-	Translation, ribosomal structure and biogenesis	Molecular Function: ATP binding (GO:0005524);; Biological Process: tRNA processing (GO:0008033);; Molecular Function: ligase activity, forming carbon-nitrogen bonds (GO:0016879);	K04075	--	PP-loop family	--	tRNA(Ile)-2-lysyl-cytidine synthase OS=Rosa chinensis OX=74649 GN=RchiOBHm_Chr2g0090271 PE=3 SV=1	Cell cycle control, cell division, chromosome partitioning	uncharacterized protein LOC101309487 isoform X1 [Fragaria vesca subsp. vesca]
							maker-Fvb1-3-snap-gene-21.73	2172401	2176246	-	--	Molecular Function: protein kinase activity (GO:0004672);; Molecular Function: ATP binding (GO:0005524);; Cellular Component: integral component of membrane (GO:0016021);	K01180	Signal transduction mechanisms	Protein tyrosine and serine/threonine kinase	Proline-rich receptor-like protein kinase PERK1 OS=Arabidopsis thaliana OX=3702 GN=PERK1 PE=1 SV=1	Protein kinase domain-containing protein OS=Rosa chinensis OX=74649 GN=RchiOBHm_Chr2g0090291 PE=4 SV=1	Signal transduction mechanisms	proline-rich receptor-like protein kinase PERK1 [Fragaria vesca subsp. vesca]
							maker-Fvb1-3-snap-gene-21.74	2164024	2164846	-	--	Molecular Function: protein serine/threonine kinase activity (GO:0004674);; Cellular Component: integral component of membrane (GO:0016021);	K13420	--	Leucine rich repeat N-terminal domain	Probably inactive leucine-rich repeat receptor-like protein kinase At5g48380 OS=Arabidopsis thaliana OX=3702 GN=At5g48380 PE=1 SV=1	Putative non-specific serine/threonine protein kinase OS=Rosa chinensis OX=74649 GN=RchiOBHm_Chr6g0281591 PE=4 SV=1	Signal transduction mechanisms	putative non-specific serine/threonine protein kinase [Rosa chinensis]
							maker-Fvb1-3-snap-gene-21.75	2178955	2182818	-	Energy production and conversion	Cellular Component: integral component of membrane (GO:0016021);; Molecular Function: chlorophyll(ide) b reductase activity (GO:0034256);	K13606	General function prediction only	short chain dehydrogenase	Probable chlorophyll(ide) b reductase NYC1, chloroplastic OS=Oryza sativa subsp. japonica OX=39947 GN=NYC1 PE=1 SV=1	Putative chlorophyll(Ide) b reductase OS=Rosa chinensis OX=74649 GN=RchiOBHm_Chr2g0090301 PE=4 SV=1	Secondary metabolites biosynthesis, transport and catabolism	probable chlorophyll(ide) b reductase NYC1, chloroplastic [Fragaria vesca subsp. vesca]
							maker-Fvb1-3-snap-gene-22.62	2188060	2195740	+	--	--	--	--	--	--	Uncharacterized protein OS=Rosa chinensis OX=74649 GN=RchiOBHm_Chr2g0090331 PE=4 SV=1	--	uncharacterized protein LOC101301808 [Fragaria vesca subsp. vesca]
							maker-Fvb1-3-snap-gene-22.64	2198779	2204080	+	Carbohydrate transport and metabolism	Cellular Component: integral component of membrane (GO:0016021);; Molecular Function: transmembrane transporter activity (GO:0022857);	K08150	General function prediction only	Sugar (and other) transporter	Polyol transporter 5 OS=Arabidopsis thaliana OX=3702 GN=PLT5 PE=1 SV=2	Uncharacterized protein OS=Fagus sylvatica OX=28930 GN=FSB_LOCUS19834 PE=4 SV=1	Intracellular trafficking, secretion, and vesicular transport	hypothetical protein G4B88_008821 [Cannabis sativa]
							maker-Fvb1-3-snap-gene-22.65	2196899	2198659	+	--	Molecular Function: molecular_function (GO:0003674);; Molecular Function: catalytic activity (GO:0003824);; Molecular Function: protein binding (GO:0005515);; Cellular Component: cellular_component (GO:0005575);; Cellular Component: intracellular (GO:0005622);; Cellular Component: obsolete cell (GO:0005623);; Cellular Component: nucleus (GO:0005634);; Cellular Component: chromosome (GO:0005694);;…	--	--	SET domain	Histone-lysine N-methyltransferase SUVR4 OS=Arabidopsis thaliana OX=3702 GN=SUVR4 PE=1 SV=2	Uncharacterized protein OS=Cynara cardunculus var. scolymus OX=59895 GN=Ccrd_012364 PE=4 SV=1	Chromatin structure and dynamics	histone-lysine N-methyltransferase SUVR4-like isoform X2 [Arachis hypogaea]
							maker-Fvb1-3-snap-gene-22.66	2215020	2215354	+	--	--	K14851	--	--	--	Putative nucleolar protein OS=Rosa chinensis OX=74649 GN=RchiOBHm_Chr5g0006551 PE=3 SV=1	Function unknown	ribosomal RNA-processing protein 17-like [Fragaria vesca subsp. vesca]
							maker-Fvb1-3-snap-gene-22.75	2235355	2236646	-	--	Molecular Function: DNA-binding transcription factor activity (GO:0003700);; Cellular Component: nucleus (GO:0005634);; Cellular Component: host cell nucleus (GO:0042025);; Molecular Function: sequence-specific DNA binding (GO:0043565);	K09419	Transcription	HSF-type DNA-binding	Heat stress transcription factor C-1 OS=Arabidopsis thaliana OX=3702 GN=HSFC1 PE=1 SV=1	Heat shock factor C1a OS=Fragaria vesca OX=57918 PE=2 SV=1	Transcription	heat stress transcription factor C-1 [Fragaria vesca subsp. vesca]
							maker-Fvb1-3-snap-gene-22.78	2255225	2258803	-	--	--	--	--	--	--	Uncharacterized protein OS=Rosa chinensis OX=74649 GN=RchiOBHm_Chr7g0225411 PE=4 SV=1	--	uncharacterized protein LOC112178147 [Rosa chinensis]
							snap_masked-Fvb1-3-processed-gene-21.25	2143698	2144405	+
							snap_masked-Fvb1-3-processed-gene-21.26	2148966	2149245	+	--	Molecular Function: 3-oxolaurate decarboxylase activity (GO:0050410);; Molecular Function: 3-oxo-myristate decarboxylase activity (GO:0102151);; Molecular Function: 3-oxo-palmitate decarboxylase activity (GO:0102577);	K20802	--	--	Methylesterase 3 OS=Arabidopsis thaliana OX=3702 GN=MES3 PE=2 SV=1	Putative 3-oxolaurate decarboxylase OS=Rosa chinensis OX=74649 GN=RchiOBHm_Chr1g0329951 PE=4 SV=1	Function unknown	methylesterase 3-like [Fragaria vesca subsp. vesca]
							snap_masked-Fvb1-3-processed-gene-21.34	2111913	2114774	-	--	--	K14851	Function unknown	--	--	Putative nucleolar protein OS=Rosa chinensis OX=74649 GN=RchiOBHm_Chr5g0006551 PE=3 SV=1	Function unknown	ribosomal RNA-processing protein 17-like [Fragaria vesca subsp. vesca]
							snap_masked-Fvb1-3-processed-gene-21.37	2158216	2161451	-	--	--	--	--	--	--	Putative kelch-type beta propeller OS=Rosa chinensis OX=74649 GN=RchiOBHm_Chr2g0088891 PE=4 SV=1	--	putative kelch-type beta propeller [Rosa chinensis]
							snap_masked-Fvb1-3-processed-gene-22.27	2216638	2217466	+	--	--	K11273	--	--	--	Uncharacterized protein OS=Rosa chinensis OX=74649 GN=RchiOBHm_Chr2g0090421 PE=4 SV=1	--	uncharacterized protein LOC112191025 isoform X1 [Rosa chinensis]
							snap_masked-Fvb1-3-processed-gene-22.31	2261183	2261520	+
Fvb1-3	2380001	2640000	259999	44	0.320043	2.55398
							augustus_masked-Fvb1-3-processed-gene-23.15	2377718	2384918	+	Cell wall/membrane/envelope biogenesis	Molecular Function: protein kinase activity (GO:0004672);; Molecular Function: ATP binding (GO:0005524);	K02218	Signal transduction mechanisms	Protein kinase domain	Casein kinase 1-like protein HD16 OS=Oryza sativa subsp. japonica OX=39947 GN=HD16 PE=1 SV=1	Protein kinase domain-containing protein OS=Rosa chinensis OX=74649 GN=RchiOBHm_Chr2g0090661 PE=4 SV=1	Signal transduction mechanisms	uncharacterized protein LOC101301711 [Fragaria vesca subsp. vesca]
							augustus_masked-Fvb1-3-processed-gene-24.10	2422894	2423328	-	--	Molecular Function: DNA binding (GO:0003677);	K03627	Transcription	Multiprotein bridging factor 1	Multiprotein-bridging factor 1c OS=Arabidopsis thaliana OX=3702 GN=MBF1C PE=1 SV=1	Putative transcription factor Lambda-DB family OS=Rosa chinensis OX=74649 GN=RchiOBHm_Chr2g0090751 PE=4 SV=1	Transcription	multiprotein-bridging factor 1c [Fragaria vesca subsp. vesca]
							augustus_masked-Fvb1-3-processed-gene-24.11	2432612	2433718	-	--	--	--	Transcription	Myb/SANT-like DNA-binding domain	Trihelix transcription factor ASIL2 OS=Arabidopsis thaliana OX=3702 GN=ASIL2 PE=1 SV=1	Putative transcription factor Trihelix family OS=Rosa chinensis OX=74649 GN=RchiOBHm_Chr2g0090791 PE=4 SV=1	Transcription	trihelix transcription factor ASIL1 [Fragaria vesca subsp. vesca]
							augustus_masked-Fvb1-3-processed-gene-24.3	2417617	2419775	+	Energy production and conversion	Molecular Function: aldehyde dehydrogenase [NAD(P)+] activity (GO:0004030);	K12355	Energy production and conversion	Aldehyde dehydrogenase family	Aldehyde dehydrogenase family 2 member C4 OS=Arabidopsis thaliana OX=3702 GN=ALDH2C4 PE=1 SV=2	Putative aldehyde dehydrogenase (NAD(P)(+)) OS=Rosa chinensis OX=74649 GN=RchiOBHm_Chr2g0090731 PE=3 SV=1	Energy production and conversion	aldehyde dehydrogenase family 2 member C4-like [Fragaria vesca subsp. vesca]
							augustus_masked-Fvb1-3-processed-gene-25.0	2492815	2494007	+	--	Molecular Function: molecular_function (GO:0003674);; Molecular Function: structural molecule activity (GO:0005198);; Molecular Function: structural constituent of cell wall (GO:0005199);; Cellular Component: cellular_component (GO:0005575);; Cellular Component: cell wall (GO:0005618);; Cellular Component: obsolete cell (GO:0005623);; Cellular Component: cell-cell junction (GO:0005911);; Cellular…	--	--	Leucine rich repeat	Leucine-rich repeat extensin-like protein 5 OS=Arabidopsis thaliana OX=3702 GN=LRX5 PE=2 SV=2	Putative leucine-rich repeat-containing, plant-type, leucine-rich repeat domain, L OS=Rosa chinensis OX=74649 GN=RchiOBHm_Chr2g0090891 PE=4 SV=1	Function unknown	leucine-rich repeat extensin-like protein 4 [Fragaria vesca subsp. vesca]
							augustus_masked-Fvb1-3-processed-gene-25.1	2494016	2495002	-	--	--	--	--	--	--	Uncharacterized protein OS=Rosa chinensis OX=74649 GN=RchiOBHm_Chr2g0090911 PE=4 SV=1	--	hypothetical protein RchiOBHm_Chr2g0090911 [Rosa chinensis]
							augustus_masked-Fvb1-3-processed-gene-25.12	2517072	2518202	-	--	Molecular Function: protein binding (GO:0005515);	K08955	--	F-box domain	F-box protein At2g43440 OS=Arabidopsis thaliana OX=3702 GN=At2g43440 PE=2 SV=1	Putative F-box domain-containing protein OS=Rosa chinensis OX=74649 GN=RchiOBHm_Chr2g0092791 PE=4 SV=1	Function unknown	F-box/kelch-repeat protein At3g06240-like [Fragaria vesca subsp. vesca]
							augustus_masked-Fvb1-3-processed-gene-25.13	2519354	2520268	-	--	Molecular Function: protein binding (GO:0005515);	--	--	F-box domain	F-box protein At5g62510 OS=Arabidopsis thaliana OX=3702 GN=At5g62510 PE=2 SV=1	Putative F-box domain-containing protein OS=Rosa chinensis OX=74649 GN=RchiOBHm_Chr2g0092791 PE=4 SV=1	--	F-box/kelch-repeat protein At3g23880-like [Fragaria vesca subsp. vesca]
							augustus_masked-Fvb1-3-processed-gene-25.16	2561246	2562073	-	--	--	--	--	--	--	DUF295 domain-containing protein OS=Prunus persica OX=3760 GN=PRUPE_3G068500 PE=4 SV=1	--	F-box protein At4g35733-like [Fragaria vesca subsp. vesca]
							augustus_masked-Fvb1-3-processed-gene-25.5	2534969	2537232	+	--	--	--	--	Protein of unknown function, DUF538	--	Uncharacterized protein OS=Rosa chinensis OX=74649 GN=RchiOBHm_Chr2g0090991 PE=4 SV=1	Function unknown	uncharacterized protein LOC101297765 [Fragaria vesca subsp. vesca]
							augustus_masked-Fvb1-3-processed-gene-26.10	2614672	2616084	-	--	--	--	--	Protein of unknown function (DUF295)	--	F-box family protein with DUF295 OS=Prunus dulcis OX=3755 GN=Prudu_011465 PE=4 SV=1	--	uncharacterized protein LOC105351628 [Fragaria vesca subsp. vesca]
							augustus_masked-Fvb1-3-processed-gene-26.2	2592166	2592930	+	--	Molecular Function: protein binding (GO:0005515);	--	--	F-box domain	F-box/LRR-repeat/kelch-repeat protein At2g27520 OS=Arabidopsis thaliana OX=3702 GN=At2g27520 PE=2 SV=1	Putative F-box domain-containing protein OS=Rosa chinensis OX=74649 GN=RchiOBHm_Chr2g0092791 PE=4 SV=1	Function unknown	F-box/kelch-repeat protein At3g06240-like [Fragaria vesca subsp. vesca]
							maker-Fvb1-3-augustus-gene-23.52	2385850	2389205	+	--	Biological Process: flower development (GO:0009908);; Biological Process: cell differentiation (GO:0030154);	K20553	--	Frigida-like protein	FRIGIDA-like protein 4a OS=Arabidopsis thaliana OX=3702 GN=FRL4A PE=2 SV=1	FRIGIDA-like protein OS=Rosa chinensis OX=74649 GN=RchiOBHm_Chr2g0090711 PE=3 SV=1	Translation, ribosomal structure and biogenesis	FRIGIDA-like protein 4a isoform X1 [Fragaria vesca subsp. vesca]
							maker-Fvb1-3-augustus-gene-24.31	2413281	2413872	+	Energy production and conversion	Molecular Function: oxidoreductase activity, acting on the aldehyde or oxo group of donors, NAD or NADP as acceptor (GO:0016620);	K12355	Energy production and conversion	Aldehyde dehydrogenase family	Aldehyde dehydrogenase family 2 member C4 OS=Arabidopsis thaliana OX=3702 GN=ALDH2C4 PE=1 SV=2	Putative oxidoreductase OS=Rosa chinensis OX=74649 GN=RchiOBHm_Chr2g0090721 PE=3 SV=1	Energy production and conversion	aldehyde dehydrogenase family 2 member C4-like [Fragaria vesca subsp. vesca]
							maker-Fvb1-3-augustus-gene-24.33	2419830	2423436	+	Energy production and conversion	Molecular Function: oxidoreductase activity, acting on the aldehyde or oxo group of donors, NAD or NADP as acceptor (GO:0016620);	K12355	Energy production and conversion	Aldehyde dehydrogenase family	Aldehyde dehydrogenase family 2 member C4 OS=Arabidopsis thaliana OX=3702 GN=ALDH2C4 PE=1 SV=2	Putative oxidoreductase OS=Rosa chinensis OX=74649 GN=RchiOBHm_Chr2g0090741 PE=3 SV=1	Energy production and conversion	aldehyde dehydrogenase family 2 member C4-like [Fragaria vesca subsp. vesca]
							maker-Fvb1-3-augustus-gene-24.35	2445915	2449394	+	Inorganic ion transport and metabolism	Molecular Function: secondary active sulfate transmembrane transporter activity (GO:0008271);; Cellular Component: integral component of membrane (GO:0016021);	K17471	Inorganic ion transport and metabolism	Sulfate permease family	Probable sulfate transporter 3.5 OS=Arabidopsis thaliana OX=3702 GN=SULTR3;5 PE=2 SV=1	Putative SLC26A/SulP transporter OS=Rosa chinensis OX=74649 GN=RchiOBHm_Chr2g0090861 PE=3 SV=1	Inorganic ion transport and metabolism	probable sulfate transporter 3.5 [Fragaria vesca subsp. vesca]
							maker-Fvb1-3-augustus-gene-25.38	2500115	2504642	+	--	Cellular Component: integral component of membrane (GO:0016021);	K23544	Function unknown	Serine incorporator (Serinc)	--	Putative serine incorporator/TMS membrane protein OS=Rosa chinensis OX=74649 GN=RchiOBHm_Chr2g0090921 PE=3 SV=1	Function unknown	probable serine incorporator isoform X1 [Fragaria vesca subsp. vesca]
							maker-Fvb1-3-augustus-gene-25.40	2530406	2532101	+	--	Biological Process: metal ion transport (GO:0030001);; Molecular Function: metal ion binding (GO:0046872);	K14292	Inorganic ion transport and metabolism	Heavy-metal-associated domain	Protein SODIUM POTASSIUM ROOT DEFECTIVE 2 OS=Arabidopsis thaliana OX=3702 GN=NAKR2 PE=2 SV=1	Putative heavy metal-associated domain, HMA OS=Rosa chinensis OX=74649 GN=RchiOBHm_Chr2g0090981 PE=4 SV=1	Inorganic ion transport and metabolism	uncharacterized protein LOC101298054 [Fragaria vesca subsp. vesca]
							maker-Fvb1-3-augustus-gene-25.43	2555154	2557544	+	--	Molecular Function: hydrolase activity (GO:0016787);	--	--	alpha/beta hydrolase fold	Strigolactone esterase D14 OS=Arabidopsis thaliana OX=3702 GN=D14 PE=1 SV=1	Putative alpha/Beta hydrolase OS=Rosa chinensis OX=74649 GN=RchiOBHm_Chr2g0091021 PE=4 SV=1	Function unknown	probable strigolactone esterase D14 homolog [Fragaria vesca subsp. vesca]
							maker-Fvb1-3-augustus-gene-25.47	2520699	2527541	-	--	Molecular Function: GTPase activator activity (GO:0005096);; Molecular Function: metal ion binding (GO:0046872);	K15044	Signal transduction mechanisms	Putative GTPase activating protein for Arf	Probable ADP-ribosylation factor GTPase-activating protein AGD14 OS=Arabidopsis thaliana OX=3702 GN=AGD14 PE=1 SV=2	Putative Arf GTPase activating protein OS=Rosa chinensis OX=74649 GN=RchiOBHm_Chr2g0090971 PE=4 SV=1	Signal transduction mechanisms	probable ADP-ribosylation factor GTPase-activating protein AGD14 isoform X1 [Fragaria vesca subsp. vesca]
							maker-Fvb1-3-augustus-gene-26.42	2626755	2630182	+	--	Cellular Component: nucleus (GO:0005634);; Biological Process: regulation of transcription, DNA-templated (GO:0006355);; Biological Process: auxin-activated signaling pathway (GO:0009734);	K14484	--	AUX/IAA family	Auxin-responsive protein IAA27 OS=Arabidopsis thaliana OX=3702 GN=IAA27 PE=1 SV=1	Auxin-responsive protein OS=Rosa chinensis OX=74649 GN=RchiOBHm_Chr2g0091261 PE=3 SV=1	Transcription	auxin-responsive protein IAA27 [Fragaria vesca subsp. vesca]
							maker-Fvb1-3-augustus-gene-26.43	2636888	2639061	+	General function prediction only	Molecular Function: nucleic acid binding (GO:0003676);; Molecular Function: methyltransferase activity (GO:0008168);; Biological Process: methylation (GO:0032259);	K07579	Translation, ribosomal structure and biogenesis	Methyltransferase small domain	--	Putative methyltransferase small domain, S-adenosyl-L-methionine-dependent methyltransferase OS=Rosa chinensis OX=74649 GN=RchiOBHm_Chr2g0091271 PE=4 SV=1	Translation, ribosomal structure and biogenesis	methyltransferase-like protein 5 [Fragaria vesca subsp. vesca]
							maker-Fvb1-3-augustus-gene-26.49	2639451	2644567	-	Translation, ribosomal structure and biogenesis	Molecular Function: translation elongation factor activity (GO:0003746);; Cellular Component: mitochondrion (GO:0005739);	K02357	Translation, ribosomal structure and biogenesis	Elongation factor TS	Polyprotein of EF-Ts, chloroplastic OS=Arabidopsis thaliana OX=3702 GN=PETs PE=1 SV=1	Elongation factor Ts, mitochondrial OS=Rosa chinensis OX=74649 GN=EFTS PE=3 SV=1	Translation, ribosomal structure and biogenesis	uncharacterized protein LOC101312281 [Fragaria vesca subsp. vesca]
							maker-Fvb1-3-snap-gene-24.42	2426913	2431360	+	General function prediction only	Molecular Function: ARF guanyl-nucleotide exchange factor activity (GO:0005086);; Biological Process: regulation of ARF protein signal transduction (GO:0032012);	K18443	Intracellular trafficking, secretion, and vesicular transport	Sec7 domain	ARF guanine-nucleotide exchange factor GNL2 OS=Arabidopsis thaliana OX=3702 GN=GNL2 PE=2 SV=1	Putative Sec7 domain, guanine nucleotide exchange factor OS=Rosa chinensis OX=74649 GN=RchiOBHm_Chr2g0090771 PE=4 SV=1	Replication, recombination and repair	ARF guanine-nucleotide exchange factor GNL2 [Fragaria vesca subsp. vesca]
							maker-Fvb1-3-snap-gene-24.45	2478655	2487219	+	--	Cellular Component: Golgi membrane (GO:0000139);; Molecular Function: structural molecule activity (GO:0005198);; Biological Process: intracellular protein transport (GO:0006886);; Biological Process: vesicle-mediated transport (GO:0016192);; Cellular Component: membrane coat (GO:0030117);; Cellular Component: COPI-coated vesicle membrane (GO:0030663);	K17302	Intracellular trafficking, secretion, and vesicular transport	Coatomer WD associated region	Coatomer subunit beta'-2 OS=Arabidopsis thaliana OX=3702 GN=At1g52360 PE=1 SV=1	Coatomer subunit beta' OS=Rosa chinensis OX=74649 GN=RchiOBHm_Chr2g0090881 PE=3 SV=1	Intracellular trafficking, secretion, and vesicular transport	coatomer subunit beta'-3-like [Fragaria vesca subsp. vesca]
							maker-Fvb1-3-snap-gene-25.49	2495330	2495979	+
							maker-Fvb1-3-snap-gene-25.51	2515716	2517019	+	--	--	--	--	--	--	Putative F-box associated interaction domain-containing protein OS=Rosa chinensis OX=74649 GN=RchiOBHm_Chr2g0090951 PE=4 SV=1	--	putative F-box associated interaction domain-containing protein [Rosa chinensis]
							maker-Fvb1-3-snap-gene-25.55	2540568	2551086	+	--	Biological Process: response to hypoxia (GO:0001666);; Molecular Function: protein binding (GO:0005515);; Cellular Component: cellular_component (GO:0005575);; Cellular Component: intracellular (GO:0005622);; Cellular Component: obsolete cell (GO:0005623);; Cellular Component: nucleus (GO:0005634);; Cellular Component: nucleoplasm (GO:0005654);; Cellular Component: chromatin silencing complex (GO…	--	--	PHD - plant homeodomain finger protein	VIN3-like protein 1 OS=Arabidopsis thaliana OX=3702 GN=VIL1 PE=1 SV=1	Putative immunoglobulin-like, oberon, PHD finger domain-containing protein OS=Rosa chinensis OX=74649 GN=RchiOBHm_Chr2g0091001 PE=4 SV=1	Function unknown	VIN3-like protein 1 isoform X1 [Rosa chinensis]
							maker-Fvb1-3-snap-gene-25.58	2562533	2578259	+	Secondary metabolites biosynthesis, transport and catabolism	Molecular Function: 3-hydroxyisobutyryl-CoA hydrolase activity (GO:0003860);	K05605	Lipid transport and metabolism	Enoyl-CoA hydratase/isomerase	3-hydroxyisobutyryl-CoA hydrolase-like protein 3, mitochondrial OS=Arabidopsis thaliana OX=3702 GN=At4g13360 PE=1 SV=2	Putative 3-hydroxyisobutyryl-CoA hydrolase OS=Rosa chinensis OX=74649 GN=RchiOBHm_Chr2g0091031 PE=3 SV=1	Lipid transport and metabolism	3-hydroxyisobutyryl-CoA hydrolase-like protein 3, mitochondrial isoform X2 [Fragaria vesca subsp. vesca]
							maker-Fvb1-3-snap-gene-25.59	2492797	2493579	-	--	--	--	--	--	--	Uncharacterized protein OS=Trema orientale OX=63057 GN=TorRG33x02_340930 PE=4 SV=1	Function unknown	hypothetical protein TorRG33x02_340930 [Trema orientale]
							maker-Fvb1-3-snap-gene-25.61	2508823	2513079	-	--	--	K04079	--	Domain of unknown function	F-box protein At3g07870 OS=Arabidopsis thaliana OX=3702 GN=At3g07870 PE=2 SV=1	Putative F-box domain-containing protein OS=Rosa chinensis OX=74649 GN=RchiOBHm_Chr2g0092791 PE=4 SV=1	Function unknown	F-box/kelch-repeat protein At3g06240-like [Fragaria vesca subsp. vesca]
							maker-Fvb1-3-snap-gene-25.63	2557850	2561233	-	--	--	--	--	Protein of unknown function (DUF295)	--	DUF295 domain-containing protein OS=Prunus persica OX=3760 GN=PRUPE_3G068500 PE=4 SV=1	Function unknown	F-box protein At4g35733-like [Fragaria vesca subsp. vesca]
							maker-Fvb1-3-snap-gene-25.64	2568120	2571756	-	Nucleotide transport and metabolism	Molecular Function: thiamine diphosphokinase activity (GO:0004788);; Molecular Function: kinase activity (GO:0016301);; Molecular Function: hydrolase activity (GO:0016787);	K00939	Nucleotide transport and metabolism	Domain of unknown function (DUF4743)	Nudix hydrolase 20, chloroplastic OS=Arabidopsis thaliana OX=3702 GN=NUDT20 PE=2 SV=1	Putative thiamine diphosphokinase OS=Rosa chinensis OX=74649 GN=RchiOBHm_Chr2g0091041 PE=4 SV=1	Nucleotide transport and metabolism	nudix hydrolase 20, chloroplastic-like [Fragaria vesca subsp. vesca]
							maker-Fvb1-3-snap-gene-26.54	2583618	2591436	+	Translation, ribosomal structure and biogenesis	Molecular Function: hydrolase activity, hydrolyzing O-glycosyl compounds (GO:0004553);; Cellular Component: nucleus (GO:0005634);; Cellular Component: mitochondrial matrix (GO:0005759);; Biological Process: carbohydrate metabolic process (GO:0005975);; Cellular Component: anchored component of plasma membrane (GO:0046658);; Molecular Function: tRNA (guanine(37)-N(1))-methyltransferase activity (G…	K15429	--	Met-10+ like-protein	tRNA (guanine(37)-N1)-methyltransferase 2 OS=Vitis vinifera OX=29760 GN=VIT_11s0016g04350 PE=3 SV=1	tRNA (guanine(37)-N1)-methyltransferase OS=Prunus persica OX=3760 GN=PRUPE_7G227000 PE=3 SV=1	RNA processing and modification	hypothetical protein PRUPE_7G227000 [Prunus persica]
							maker-Fvb1-3-snap-gene-26.55	2610467	2618286	+	--	Cellular Component: mitochondrion (GO:0005739);; Molecular Function: NADPH-adrenodoxin reductase activity (GO:0015039);; Molecular Function: transferase activity (GO:0016740);	K18914	Nucleotide transport and metabolism	Pyridine nucleotide-disulphide oxidoreductase	NADPH:adrenodoxin oxidoreductase, mitochondrial OS=Arabidopsis thaliana OX=3702 GN=MFDR PE=1 SV=1	NADPH:adrenodoxin oxidoreductase, mitochondrial OS=Rosa chinensis OX=74649 GN=RchiOBHm_Chr2g0091251 PE=3 SV=1	Energy production and conversion	NADPH:adrenodoxin oxidoreductase, mitochondrial-like [Fragaria vesca subsp. vesca]
							maker-Fvb1-3-snap-gene-26.63	2601179	2603819	-	--	Molecular Function: protein dimerization activity (GO:0046983);	K14638	--	--	Transcription factor bHLH68 OS=Arabidopsis thaliana OX=3702 GN=BHLH68 PE=1 SV=2	Putative transcription factor bHLH family OS=Rosa chinensis OX=74649 GN=RchiOBHm_Chr2g0091241 PE=4 SV=1	Transcription	transcription factor bHLH68 [Fragaria vesca subsp. vesca]
							maker-Fvb1-3-snap-gene-26.65	2621572	2621926	-	--	--	--	--	Protein of unknown function (DUF295)	--	DUF295 domain-containing protein OS=Malus baccata OX=106549 GN=C1H46_036549 PE=4 SV=1	--	uncharacterized protein LOC105351628 [Fragaria vesca subsp. vesca]
							snap_masked-Fvb1-3-processed-gene-24.15	2396626	2399711	+	Energy production and conversion	Molecular Function: oxidoreductase activity, acting on the aldehyde or oxo group of donors, NAD or NADP as acceptor (GO:0016620);	K12355	Energy production and conversion	Aldehyde dehydrogenase family	Aldehyde dehydrogenase family 2 member C4 OS=Arabidopsis thaliana OX=3702 GN=ALDH2C4 PE=1 SV=2	Putative oxidoreductase OS=Rosa chinensis OX=74649 GN=RchiOBHm_Chr2g0090721 PE=3 SV=1	Energy production and conversion	aldehyde dehydrogenase family 2 member C4-like [Fragaria vesca subsp. vesca]
							snap_masked-Fvb1-3-processed-gene-24.19	2425832	2426527	+	Replication, recombination and repair	Molecular Function: ATP binding (GO:0005524);; Biological Process: mismatch repair (GO:0006298);; Molecular Function: mismatched DNA binding (GO:0030983);	K08737	Replication, recombination and repair	MutS domain V	DNA mismatch repair protein MSH7 OS=Arabidopsis thaliana OX=3702 GN=MSH7 PE=1 SV=1	Putative DNA mismatch repair protein MutS, type 1 OS=Rosa chinensis OX=74649 GN=RchiOBHm_Chr2g0090761 PE=4 SV=1	Replication, recombination and repair	DNA mismatch repair protein MSH7 isoform X1 [Fragaria vesca subsp. vesca]
							snap_masked-Fvb1-3-processed-gene-24.23	2434226	2435154	+
							snap_masked-Fvb1-3-processed-gene-24.26	2451120	2477541	+	--	Molecular Function: RNA polymerase II transcription regulatory region sequence-specific DNA binding (GO:0000977);; Molecular Function: DNA-binding transcription factor activity (GO:0003700);; Cellular Component: nucleus (GO:0005634);; Biological Process: positive regulation of transcription by RNA polymerase II (GO:0045944);; Molecular Function: protein dimerization activity (GO:0046983);	K09264	Transcription	K-box region	Agamous-like MADS-box protein FUL-L OS=Vitis vinifera OX=29760 GN=FULL PE=2 SV=1	MADS-box transcription factor FBP29 OS=Petunia hybrida OX=4102 GN=FBP29 PE=2 SV=1	Transcription	FRUITFUL-like protein, partial [Petunia exserta]
							snap_masked-Fvb1-3-processed-gene-25.22	2514980	2515622	+	--	--	--	--	--	--	Putative F-box associated interaction domain-containing protein OS=Rosa chinensis OX=74649 GN=RchiOBHm_Chr2g0090951 PE=4 SV=1	--	F-box protein At5g49610-like [Fragaria vesca subsp. vesca]
							snap_masked-Fvb1-3-processed-gene-25.24	2527531	2529242	+
							snap_masked-Fvb1-3-processed-gene-26.16	2581055	2581752	+	--	Molecular Function: protein binding (GO:0005515);	--	--	F-box domain	F-box/kelch-repeat protein At3g06240 OS=Arabidopsis thaliana OX=3702 GN=At3g06240 PE=2 SV=1	Putative F-box domain-containing protein OS=Rosa chinensis OX=74649 GN=RchiOBHm_Chr2g0092791 PE=4 SV=1	Function unknown	F-box/kelch-repeat protein At3g06240-like [Fragaria vesca subsp. vesca]
Fvb1-3	2830001	3030000	199999	41	0.336915	2.63534
							augustus_masked-Fvb1-3-processed-gene-28.10	2879262	2880238	+	--	Biological Process: phosphorelay signal transduction system (GO:0000160);; Molecular Function: kinase activity (GO:0016301);	K14490	Signal transduction mechanisms	Hpt domain	Pseudo histidine-containing phosphotransfer protein 5 OS=Oryza sativa subsp. japonica OX=39947 GN=PHP5 PE=2 SV=1	Putative signal transduction histidine kinase, phosphotransfer (Hpt) domain-containing protein OS=Rosa chinensis OX=74649 GN=RchiOBHm_Chr2g0091811 PE=4 SV=1	Signal transduction mechanisms	histidine-containing phosphotransfer protein 4-like [Fragaria vesca subsp. vesca]
							augustus_masked-Fvb1-3-processed-gene-28.9	2877064	2878362	+	--	Molecular Function: protein serine/threonine phosphatase activity (GO:0004722);; Molecular Function: metal ion binding (GO:0046872);	K14497	Signal transduction mechanisms	Protein phosphatase 2C	Protein phosphatase 2C 16 OS=Arabidopsis thaliana OX=3702 GN=HAB1 PE=1 SV=1	Protein-serine/threonine phosphatase OS=Rosa chinensis OX=74649 GN=RchiOBHm_Chr2g0091801 PE=3 SV=1	Signal transduction mechanisms	probable protein phosphatase 2C 6 [Fragaria vesca subsp. vesca]
							augustus_masked-Fvb1-3-processed-gene-29.3	2911469	2912098	+	--	Cellular Component: cellular_component (GO:0005575);; Cellular Component: intracellular (GO:0005622);; Cellular Component: obsolete cell (GO:0005623);; Cellular Component: cytoplasm (GO:0005737);; Cellular Component: mitochondrion (GO:0005739);; Cellular Component: mitochondrial envelope (GO:0005740);; Cellular Component: mitochondrial inner membrane (GO:0005743);; Cellular Component: TIM23 mitoc…	K17795	Intracellular trafficking, secretion, and vesicular transport	Tim17/Tim22/Tim23/Pmp24 family	Mitochondrial import inner membrane translocase subunit TIM17-1 OS=Arabidopsis thaliana OX=3702 GN=TIM17-1 PE=2 SV=1	Mitochondrial inner membrane translocase subunit Tim17/Tim22/Tim23/peroxisomal protein PMP24 OS=Rosa chinensis OX=74649 GN=RchiOBHm_Chr3g0491401 PE=4 SV=1	Intracellular trafficking, secretion, and vesicular transport	mitochondrial import inner membrane translocase subunit TIM17-2-like [Fragaria vesca subsp. vesca]
							augustus_masked-Fvb1-3-processed-gene-29.5	2935701	2937350	+	Defense mechanisms	Molecular Function: antiporter activity (GO:0015297);; Cellular Component: integral component of membrane (GO:0016021);; Molecular Function: xenobiotic transmembrane transporter activity (GO:0042910);	K03327	General function prediction only	MatE	Protein DETOXIFICATION 51 OS=Arabidopsis thaliana OX=3702 GN=DTX51 PE=2 SV=1	Protein DETOXIFICATION OS=Prunus dulcis OX=3755 GN=ALMOND_2B003212 PE=3 SV=1	Defense mechanisms	multidrug and toxin extrusion protein 2 [Fragaria vesca subsp. vesca]
							augustus_masked-Fvb1-3-processed-gene-29.9	2909104	2911047	-	Translation, ribosomal structure and biogenesis	Molecular Function: RNA binding (GO:0003723);; Biological Process: RNA processing (GO:0006396);; Molecular Function: RNA methyltransferase activity (GO:0008173);	K15507	RNA processing and modification	SpoU rRNA Methylase family	--	Putative 23S rRNA (Guanosine(2251)-2'-O)-methyltransferase OS=Rosa chinensis OX=74649 GN=RchiOBHm_Chr2g0091911 PE=4 SV=1	RNA processing and modification	uncharacterized protein LOC101296509 [Fragaria vesca subsp. vesca]
							augustus_masked-Fvb1-3-processed-gene-30.14	3026141	3027346	-	--	Molecular Function: protein binding (GO:0005515);	--	--	Leucine rich repeat	Leucine-rich repeat extensin-like protein 2 OS=Arabidopsis thaliana OX=3702 GN=LRX2 PE=1 SV=1	Putative leucine-rich repeat-containing, plant-type, leucine-rich repeat domain, L OS=Rosa chinensis OX=74649 GN=RchiOBHm_Chr2g0092261 PE=4 SV=1	Function unknown	leucine-rich repeat extensin-like protein 4 [Rosa chinensis]
							augustus_masked-Fvb1-3-processed-gene-30.2	2999729	3001486	-
							augustus_masked-Fvb1-3-processed-gene-30.3	3001881	3002783	+	Lipid transport and metabolism	Molecular Function: 2-acylglycerol O-acyltransferase activity (GO:0003846);	K18368	Lipid transport and metabolism	Serine aminopeptidase, S33	Caffeoylshikimate esterase OS=Arabidopsis thaliana OX=3702 GN=CSE PE=1 SV=1	Putative 2-acylglycerol O-acyltransferase OS=Rosa chinensis OX=74649 GN=RchiOBHm_Chr2g0092201 PE=4 SV=1	Lipid transport and metabolism	caffeoylshikimate esterase-like [Fragaria vesca subsp. vesca]
							maker-Fvb1-3-augustus-gene-28.42	2861484	2866985	+	Energy production and conversion	Molecular Function: malate dehydrogenase (decarboxylating) (NAD+) activity (GO:0004471);; Molecular Function: metal ion binding (GO:0046872);; Molecular Function: NAD binding (GO:0051287);	K00029	Energy production and conversion	Malic enzyme, NAD binding domain	NADP-dependent malic enzyme OS=Vitis vinifera OX=29760 PE=2 SV=1	Malic enzyme OS=Rosa chinensis OX=74649 GN=RchiOBHm_Chr2g0091741 PE=3 SV=1	Energy production and conversion	NADP-dependent malic enzyme [Fragaria vesca subsp. vesca]	Liao et al., 2021
							maker-Fvb1-3-augustus-gene-28.44	2865676	2869493	-	Secondary metabolites biosynthesis, transport and catabolism	Molecular Function: 1-aminocyclopropane-1-carboxylate oxidase activity (GO:0009815);; Molecular Function: metal ion binding (GO:0046872);	K06892	--	non-haem dioxygenase in morphine synthesis N-terminal	Probable 2-oxoglutarate-dependent dioxygenase At3g50210 OS=Arabidopsis thaliana OX=3702 GN=At3g50210 PE=2 SV=1	Putative aminocyclopropanecarboxylate oxidase OS=Rosa chinensis OX=74649 GN=RchiOBHm_Chr2g0091751 PE=3 SV=1	Secondary metabolites biosynthesis, transport and catabolism	probable 2-oxoglutarate-dependent dioxygenase At3g49630 isoform X1 [Fragaria vesca subsp. vesca]	Liao et al., 2021
							maker-Fvb1-3-augustus-gene-28.46	2880159	2886409	-	Defense mechanisms	Molecular Function: ATP binding (GO:0005524);; Cellular Component: integral component of membrane (GO:0016021);; Molecular Function: ATPase activity (GO:0016887);; Molecular Function: ATPase-coupled transmembrane transporter activity (GO:0042626);	K05658	Secondary metabolites biosynthesis, transport and catabolism	ABC transporter transmembrane region	Putative ABC transporter B family member 8 OS=Arabidopsis thaliana OX=3702 GN=ABCB8 PE=5 SV=1	Putative xenobiotic-transporting ATPase OS=Rosa chinensis OX=74649 GN=RchiOBHm_Chr2g0091821 PE=4 SV=1	Secondary metabolites biosynthesis, transport and catabolism	putative ABC transporter B family member 8 [Fragaria vesca subsp. vesca]
							maker-Fvb1-3-augustus-gene-29.36	2915699	2922534	+	Cell wall/membrane/envelope biogenesis	Molecular Function: protein kinase activity (GO:0004672);; Molecular Function: ATP binding (GO:0005524);; Cellular Component: integral component of membrane (GO:0016021);	K00924	--	Protein kinase domain	Receptor-like protein kinase 5 OS=Arabidopsis thaliana OX=3702 GN=RLK5 PE=1 SV=1	Protein kinase domain-containing protein OS=Rosa chinensis OX=74649 GN=RchiOBHm_Chr2g0091961 PE=4 SV=1	Signal transduction mechanisms	receptor-like protein kinase HSL1 [Fragaria vesca subsp. vesca]
							maker-Fvb1-3-augustus-gene-29.37	2944937	2947293	+	--	Cellular Component: cellular_component (GO:0005575);; Cellular Component: intracellular (GO:0005622);; Cellular Component: obsolete cell (GO:0005623);; Cellular Component: cytoplasm (GO:0005737);; Cellular Component: cytosol (GO:0005829);; Cellular Component: cytoskeleton (GO:0005856);; Cellular Component: microtubule associated complex (GO:0005875);; Cellular Component: plasma membrane (GO:00058…	--	--	Protein of unknown function (DUF4005)	--	Putative IQ motif, EF-hand binding protein OS=Rosa chinensis OX=74649 GN=RchiOBHm_Chr2g0092031 PE=4 SV=1	Function unknown	protein IQ-DOMAIN 14-like [Fragaria vesca subsp. vesca]
							maker-Fvb1-3-augustus-gene-29.39	2890476	2893901	-	--	Biological Process: charged-tRNA amino acid modification (GO:0019988);; Molecular Function: tRNA A64-2'-O-ribosylphosphate transferase activity (GO:0043399);	K15463	RNA processing and modification	Rit1 N-terminal domain	--	Putative tRNA A64-2'-O-ribosylphosphate transferase, protein-tyrosine phosphatase, rit1 OS=Rosa chinensis OX=74649 GN=RchiOBHm_Chr2g0091831 PE=4 SV=1	RNA processing and modification	tRNA A64-2'-O-ribosylphosphate transferase isoform X1 [Fragaria vesca subsp. vesca]
							maker-Fvb1-3-augustus-gene-29.41	2902239	2907173	-	Cell motility	Molecular Function: ceramide glucosyltransferase activity (GO:0008120);; Cellular Component: integral component of membrane (GO:0016021);; Molecular Function: dihydroceramide glucosyltransferase activity (GO:0102769);	--	--	Glycosyl transferase family 21	--	Ceramide glucosyltransferase OS=Rosa chinensis OX=74649 GN=RchiOBHm_Chr2g0091861 PE=3 SV=1	--	uncharacterized protein LOC101296224 [Fragaria vesca subsp. vesca]
							maker-Fvb1-3-augustus-gene-29.42	2915786	2923843	-	Carbohydrate transport and metabolism	Biological Process: cellular glucose homeostasis (GO:0001678);; Molecular Function: hexokinase activity (GO:0004396);; Molecular Function: ATP binding (GO:0005524);; Molecular Function: glucose binding (GO:0005536);; Biological Process: glycolytic process (GO:0006096);	K00844	Carbohydrate transport and metabolism	Hexokinase	Hexokinase-1 OS=Arabidopsis thaliana OX=3702 GN=HXK1 PE=1 SV=2	Phosphotransferase OS=Rosa chinensis OX=74649 GN=RchiOBHm_Chr2g0091971 PE=3 SV=1	Carbohydrate transport and metabolism	hexokinase-1 [Fragaria vesca subsp. vesca]
							maker-Fvb1-3-augustus-gene-29.43	2925090	2925955	-	--	--	--	--	--	--	Uncharacterized protein OS=Rosa chinensis OX=74649 GN=RchiOBHm_Chr2g0091981 PE=4 SV=1	--	hypothetical protein RchiOBHm_Chr2g0091981 [Rosa chinensis]
							maker-Fvb1-3-augustus-gene-29.44	2948956	2951879	-	--	Molecular Function: pectinesterase activity (GO:0030599);; Biological Process: cell wall modification (GO:0042545);; Molecular Function: aspartyl esterase activity (GO:0045330);; Biological Process: pectin catabolic process (GO:0045490);	K01051	--	Pectinesterase	Probable pectinesterase 53 OS=Arabidopsis thaliana OX=3702 GN=PME53 PE=2 SV=1	Pectinesterase OS=Rosa chinensis OX=74649 GN=RchiOBHm_Chr2g0092041 PE=4 SV=1	Carbohydrate transport and metabolism	probable pectinesterase 53 [Fragaria vesca subsp. vesca]
							maker-Fvb1-3-augustus-gene-29.45	2963615	2964689	-	--	--	--	Transcription	--	--	Uncharacterized protein OS=Rosa chinensis OX=74649 GN=RchiOBHm_Chr2g0092151 PE=4 SV=1	Transcription	uncharacterized protein LOC101299700 [Fragaria vesca subsp. vesca]
							maker-Fvb1-3-augustus-gene-30.47	2992015	2995485	+
							maker-Fvb1-3-augustus-gene-30.49	3019430	3022049	+	--	--	--	--	Protein of unknown function (DUF1005)	--	Uncharacterized protein OS=Rosa chinensis OX=74649 GN=RchiOBHm_Chr2g0092241 PE=4 SV=1	Function unknown	uncharacterized protein LOC101301714 [Fragaria vesca subsp. vesca]
							maker-Fvb1-3-augustus-gene-30.55	3003518	3004710	-	--	Molecular Function: actin binding (GO:0003779);; Cellular Component: cytoskeleton (GO:0005856);	K05759	Cytoskeleton	Profilin	Profilin OS=Fragaria ananassa OX=3747 PE=1 SV=1	Profilin OS=Rosa chinensis OX=74649 GN=RchiOBHm_Chr2g0092211 PE=3 SV=1	Cytoskeleton	profilin [Fragaria vesca subsp. vesca]
							maker-Fvb1-3-augustus-gene-30.56	3006070	3007610	-	--	Molecular Function: actin binding (GO:0003779);; Cellular Component: cytoskeleton (GO:0005856);	K05759	Cytoskeleton	Profilin	Profilin-2 OS=Corylus avellana OX=13451 PE=1 SV=1	Profilin OS=Rosa chinensis OX=74649 GN=RchiOBHm_Chr2g0092221 PE=3 SV=1	Cytoskeleton	profilin-2 [Fragaria vesca subsp. vesca]
							maker-Fvb1-3-snap-gene-28.49	2841071	2860070	+	--	Molecular Function: RNA binding (GO:0003723);; Molecular Function: RNA-directed 5'-3' RNA polymerase activity (GO:0003968);; Biological Process: gene silencing by RNA (GO:0031047);	K11699	RNA processing and modification	RNA dependent RNA polymerase	Probable RNA-dependent RNA polymerase 3 OS=Arabidopsis thaliana OX=3702 GN=RDR3 PE=3 SV=2	RNA-dependent RNA polymerase OS=Rosa chinensis OX=74649 GN=RchiOBHm_Chr2g0091711 PE=3 SV=1	RNA processing and modification	probable RNA-dependent RNA polymerase 5 isoform X2 [Fragaria vesca subsp. vesca]
							maker-Fvb1-3-snap-gene-28.56	2870135	2875466	-	--	Biological Process: protein polyubiquitination (GO:0000209);; Molecular Function: molecular_function (GO:0003674);; Molecular Function: catalytic activity (GO:0003824);; Molecular Function: ubiquitin-protein transferase activity (GO:0004842);; Biological Process: cellular protein modification process (GO:0006464);; Biological Process: proteolysis (GO:0006508);; Biological Process: ubiquitin-depen…	K22378	--	Ring finger domain	--	Putative transcription factor C2H2 family OS=Rosa chinensis OX=74649 GN=RchiOBHm_Chr2g0091781 PE=4 SV=1	Posttranslational modification, protein turnover, chaperones	E3 ubiquitin-protein ligase RING1-like [Fragaria vesca subsp. vesca]
							maker-Fvb1-3-snap-gene-29.48	2899037	2902144	+	--	Molecular Function: heme binding (GO:0020037);; Molecular Function: metal ion binding (GO:0046872);	K23490	Energy production and conversion	Cytochrome b5-like Heme/Steroid binding domain	Cytochrome B5-like protein OS=Arabidopsis thaliana OX=3702 GN=CB5LP PE=2 SV=1	Putative cytochrome b5-like heme/steroid binding domain-containing protein OS=Rosa chinensis OX=74649 GN=RchiOBHm_Chr2g0091851 PE=3 SV=1	Energy production and conversion	cytochrome B5-like protein [Fragaria vesca subsp. vesca]
							maker-Fvb1-3-snap-gene-29.51	2954003	2954328	+	--	Cellular Component: integral component of membrane (GO:0016021);	K19040	Posttranslational modification, protein turnover, chaperones	Ring finger domain	Brassinosteroid-responsive RING protein 1 OS=Arabidopsis thaliana OX=3702 GN=BRH1 PE=2 SV=1	Putative transcription factor C2H2 family OS=Rosa chinensis OX=74649 GN=RchiOBHm_Chr2g0092061 PE=4 SV=1	Posttranslational modification, protein turnover, chaperones	putative transcription factor C2H2 family [Rosa chinensis]
							maker-Fvb1-3-snap-gene-29.54	2894867	2896904	-	--	--	K19366	--	Senescence-associated protein	Protein EARLY-RESPONSIVE TO DEHYDRATION 7, chloroplastic OS=Arabidopsis thaliana OX=3702 GN=ERD7 PE=1 SV=1	Putative senescence/spartin-associated OS=Rosa chinensis OX=74649 GN=RchiOBHm_Chr2g0091841 PE=4 SV=1	Function unknown	spartin-like [Fragaria vesca subsp. vesca]
							maker-Fvb1-3-snap-gene-29.60	2955164	2955690	-	--	--	--	--	--	--	Programmed cell death-4 OS=Fragaria vesca OX=57918 GN=PCD-4 PE=2 SV=1	--	programmed cell death-4 [Fragaria vesca]
							maker-Fvb1-3-snap-gene-29.62	2966492	2970396	-	General function prediction only	Molecular Function: protein serine/threonine kinase activity (GO:0004674);; Molecular Function: MAP kinase kinase activity (GO:0004708);; Molecular Function: ATP binding (GO:0005524);	K04368	Signal transduction mechanisms	Protein kinase domain	Mitogen-activated protein kinase kinase 6 OS=Arabidopsis thaliana OX=3702 GN=MKK6 PE=1 SV=1	Putative mitogen-activated protein kinase kinase STE-STE7 family OS=Rosa chinensis OX=74649 GN=RchiOBHm_Chr2g0092161 PE=3 SV=1	Signal transduction mechanisms	mitogen-activated protein kinase kinase 6 isoform X1 [Fragaria vesca subsp. vesca]
							maker-Fvb1-3-snap-gene-29.63	2985268	2986326	-
							maker-Fvb1-3-snap-gene-29.64	2984437	2985238	-	--	--	--	--	--	--	Putative Myb/SANT-like domain-containing protein OS=Rosa chinensis OX=74649 GN=RchiOBHm_Chr1g0354771 PE=4 SV=1	Function unknown	L10-interacting MYB domain-containing protein-like [Rosa chinensis]
							maker-Fvb1-3-snap-gene-30.63	2986619	2990777	+	--	Molecular Function: molecular_function (GO:0003674);; Molecular Function: nucleic acid binding (GO:0003676);; Molecular Function: RNA binding (GO:0003723);; Molecular Function: catalytic activity (GO:0003824);; Molecular Function: nuclease activity (GO:0004518);; Molecular Function: endonuclease activity (GO:0004519);; Molecular Function: binding (GO:0005488);; Cellular Component: cellular_compon…	--	General function prediction only	PPR repeat	Pentatricopeptide repeat-containing protein At5g65560 OS=Arabidopsis thaliana OX=3702 GN=At5g65560 PE=2 SV=1	Putative tetratricopeptide-like helical domain, pentacotripeptide-repeat region of PROPR OS=Rosa chinensis OX=74649 GN=RchiOBHm_Chr2g0092171 PE=4 SV=1	Function unknown	pentatricopeptide repeat-containing protein At5g65560-like [Fragaria vesca subsp. vesca]
							maker-Fvb1-3-snap-gene-30.67	3023193	3025737	+	General function prediction only	Molecular Function: acid phosphatase activity (GO:0003993);	K20728	--	HAD superfamily, subfamily IIIB (Acid phosphatase)	Acid phosphatase 1 OS=Solanum lycopersicum OX=4081 GN=APS1 PE=2 SV=1	Putative Acid phosphatase OS=Rosa chinensis OX=74649 GN=RchiOBHm_Chr2g0092251 PE=4 SV=1	Function unknown	acid phosphatase 1 [Fragaria vesca subsp. vesca]
							maker-Fvb1-3-snap-gene-30.71	2995973	2996434	-
							maker-Fvb1-3-snap-gene-30.74	3008355	3011353	-	--	Cellular Component: endoplasmic reticulum membrane (GO:0005789);; Cellular Component: integral component of membrane (GO:0016021);	K13989	Function unknown	Der1-like family	Derlin-1 OS=Arabidopsis thaliana OX=3702 GN=DER1 PE=2 SV=1	Derlin OS=Rosa chinensis OX=74649 GN=RchiOBHm_Chr2g0092231 PE=3 SV=1	Function unknown	derlin-1 [Rosa chinensis]
							snap_masked-Fvb1-3-processed-gene-28.25	2832876	2839368	+	--	Biological Process: Golgi organization (GO:0007030);; Cellular Component: integral component of membrane (GO:0016021);	K15255	--	Golgin subfamily A member 5	Golgin candidate 1 OS=Arabidopsis thaliana OX=3702 GN=GC1 PE=2 SV=2	Putative Golgin subfamily A member 5 protein OS=Rosa chinensis OX=74649 GN=RchiOBHm_Chr2g0091661 PE=4 SV=1	Function unknown	golgin candidate 1 [Fragaria vesca subsp. vesca]
							snap_masked-Fvb1-3-processed-gene-29.20	2913275	2914656	+	Lipid transport and metabolism	Molecular Function: 2-hydroxy-3-oxopropionate reductase activity (GO:0008679);; Molecular Function: NADP binding (GO:0050661);; Molecular Function: NAD binding (GO:0051287);	K00020	General function prediction only	NAD binding domain of 6-phosphogluconate dehydrogenase	Probable 3-hydroxyisobutyrate dehydrogenase-like 1, mitochondrial OS=Arabidopsis thaliana OX=3702 GN=At4g29120 PE=1 SV=1	Putative 2-hydroxy-3-oxopropionate reductase OS=Rosa chinensis OX=74649 GN=RchiOBHm_Chr2g0091951 PE=4 SV=1	Lipid transport and metabolism	probable 3-hydroxyisobutyrate dehydrogenase-like 1, mitochondrial [Fragaria vesca subsp. vesca]
							snap_masked-Fvb1-3-processed-gene-29.25	2957117	2964710	+	Translation, ribosomal structure and biogenesis	Molecular Function: arginine-tRNA ligase activity (GO:0004814);; Molecular Function: ATP binding (GO:0005524);; Cellular Component: cytoplasm (GO:0005737);; Biological Process: arginyl-tRNA aminoacylation (GO:0006420);	K01887	Translation, ribosomal structure and biogenesis	tRNA synthetases class I (R)	Arginine--tRNA ligase, chloroplastic/mitochondrial OS=Arabidopsis thaliana OX=3702 GN=EMB1027 PE=1 SV=1	Arginyl-tRNA synthetase OS=Rosa chinensis OX=74649 GN=RchiOBHm_Chr2g0092141 PE=3 SV=1	Translation, ribosomal structure and biogenesis	arginine--tRNA ligase, cytoplasmic-like isoform X2 [Fragaria vesca subsp. vesca]
							snap_masked-Fvb1-3-processed-gene-29.28	2911612	2911821	-	--	--	--	--	--	--	Uncharacterized protein OS=Ostreococcus tauri OX=70448 GN=BE221DRAFT_201678 PE=4 SV=1	--	hypothetical protein BE221DRAFT_201678 [Ostreococcus tauri]
							snap_masked-Fvb1-3-processed-gene-30.22	2996672	2997598	+
Fvb1-4	11360001	11470000	109999	13	0.278947	2.14588
							augustus_masked-Fvb1-4-processed-gene-114.0	11386222	11388468	-	--	--	--	--	--	--	Uncharacterized protein OS=Rosa chinensis OX=74649 GN=RchiOBHm_Chr2g0112431 PE=4 SV=1	Function unknown	WEB family protein At5g16730, chloroplastic [Fragaria vesca subsp. vesca]
							augustus_masked-Fvb1-4-processed-gene-114.1	11389721	11399783	-	--	Molecular Function: transcription corepressor activity (GO:0003714);; Biological Process: transcription, DNA-templated (GO:0006351);	K22733	--	Protein SCAI	Pentatricopeptide repeat-containing protein At4g02750 OS=Arabidopsis thaliana OX=3702 GN=PCMP-H24 PE=3 SV=1	Uncharacterized protein OS=Rosa chinensis OX=74649 GN=RchiOBHm_Chr2g0112401 PE=4 SV=1	Function unknown	protein SCAI [Fragaria vesca subsp. vesca]
							augustus_masked-Fvb1-4-processed-gene-114.11	11456685	11457425	-	Carbohydrate transport and metabolism	Molecular Function: ribose-5-phosphate isomerase activity (GO:0004751);; Biological Process: pentose-phosphate shunt, non-oxidative branch (GO:0009052);	K01807	Carbohydrate transport and metabolism	Ribose 5-phosphate isomerase A (phosphoriboisomerase A)	Probable ribose-5-phosphate isomerase 2 OS=Arabidopsis thaliana OX=3702 GN=RPI2 PE=1 SV=1	Ribose-5-phosphate isomerase OS=Rosa chinensis OX=74649 GN=RchiOBHm_Chr2g0112671 PE=3 SV=1	Carbohydrate transport and metabolism	probable ribose-5-phosphate isomerase 2 [Fragaria vesca subsp. vesca]
							augustus_masked-Fvb1-4-processed-gene-114.3	11412043	11419421	+
							augustus_masked-Fvb1-4-processed-gene-114.4	11440579	11440812	+
							augustus_masked-Fvb1-4-processed-gene-114.9	11407561	11408828	-	--	Molecular Function: structural constituent of ribosome (GO:0003735);; Cellular Component: ribosome (GO:0005840);; Biological Process: translation (GO:0006412);	K02935	Translation, ribosomal structure and biogenesis	--	--	Putative ribosomal protein L7/L12 OS=Rosa chinensis OX=74649 GN=RchiOBHm_Chr7g0217101 PE=4 SV=1	Translation, ribosomal structure and biogenesis	50S ribosomal protein L12, chloroplastic-like [Fragaria vesca subsp. vesca]
							maker-Fvb1-4-augustus-gene-114.34	11458261	11462106	+	--	Molecular Function: RNA binding (GO:0003723);	K14396	RNA processing and modification	RNA recognition motif. (a.k.a. RRM, RBD, or RNP domain)	Polyadenylate-binding protein 2 OS=Arabidopsis thaliana OX=3702 GN=PABN2 PE=1 SV=1	RRM domain-containing protein OS=Glycine max OX=3847 GN=100789721 PE=4 SV=1	RNA processing and modification	polyadenylate-binding protein 2-like [Fragaria vesca subsp. vesca]
							maker-Fvb1-4-augustus-gene-114.35	11464481	11469296	+	Translation, ribosomal structure and biogenesis	Molecular Function: RNA binding (GO:0003723);	K14396	RNA processing and modification	RNA recognition motif. (a.k.a. RRM, RBD, or RNP domain)	Polyadenylate-binding protein 2 OS=Arabidopsis thaliana OX=3702 GN=PABN2 PE=1 SV=1	Putative nucleotide-binding alpha-beta plait domain-containing protein OS=Rosa chinensis OX=74649 GN=RchiOBHm_Chr2g0112711 PE=4 SV=1	RNA processing and modification	polyadenylate-binding protein 2-like [Fragaria vesca subsp. vesca]
							maker-Fvb1-4-augustus-gene-114.38	11418983	11422844	-	General function prediction only	Molecular Function: GTPase activity (GO:0003924);; Molecular Function: GTP binding (GO:0005525);	K07904	Intracellular trafficking, secretion, and vesicular transport	Ras family	Ras-related protein Rab11D OS=Nicotiana tabacum OX=4097 GN=RAB11D PE=2 SV=1	Putative small GTPase superfamily, P-loop containing nucleoside triphosphate hydrolase OS=Rosa chinensis OX=74649 GN=RchiOBHm_Chr2g0112511 PE=4 SV=1	Intracellular trafficking, secretion, and vesicular transport	ras-related protein Rab11D [Fragaria vesca subsp. vesca]
							maker-Fvb1-4-snap-gene-113.39	11378021	11384061	-	--	Biological Process: metabolic process (GO:0008152);; Molecular Function: hydrolase activity, acting on glycosyl bonds (GO:0016798);	--	Defense mechanisms	Lanthionine synthetase C-like protein	LanC-like protein GCL1 OS=Arabidopsis thaliana OX=3702 GN=GCL1 PE=2 SV=1	Putative lanthionine synthetase C, six-hairpin glycosidase OS=Rosa chinensis OX=74649 GN=RchiOBHm_Chr2g0112441 PE=3 SV=1	Defense mechanisms	lanC-like protein GCL1 [Fragaria vesca subsp. vesca]
							maker-Fvb1-4-snap-gene-114.42	11449878	11455505	+	Signal transduction mechanisms	Molecular Function: ATP binding (GO:0005524);; Cellular Component: integral component of membrane (GO:0016021);; Molecular Function: ATPase activity (GO:0016887);	K05681	Secondary metabolites biosynthesis, transport and catabolism	ABC-2 type transporter	ABC transporter G family member 11 OS=Arabidopsis thaliana OX=3702 GN=ABCG11 PE=1 SV=1	Putative taurine-transporting ATPase OS=Rosa chinensis OX=74649 GN=RchiOBHm_Chr2g0112641 PE=4 SV=1	Secondary metabolites biosynthesis, transport and catabolism	ABC transporter G family member 11-like [Fragaria vesca subsp. vesca]
							maker-Fvb1-4-snap-gene-114.46	11388499	11389422	-
							snap_masked-Fvb1-4-processed-gene-113.20	11370659	11371161	-
Fvb1-4	13010001	13130000	119999	19	0.389133	3.00394
							augustus_masked-Fvb1-4-processed-gene-130.3	13021870	13024849	+	--	Cellular Component: exocyst (GO:0000145);; Biological Process: vesicle docking involved in exocytosis (GO:0006904);	K19985	Intracellular trafficking, secretion, and vesicular transport	--	Exocyst complex component SEC15B OS=Arabidopsis thaliana OX=3702 GN=SEC15B PE=1 SV=1	Exocyst complex component OS=Rosa chinensis OX=74649 GN=RchiOBHm_Chr6g0294231 PE=3 SV=1	Intracellular trafficking, secretion, and vesicular transport	exocyst complex component SEC15B [Fragaria vesca subsp. vesca]
							augustus_masked-Fvb1-4-processed-gene-130.4	13026161	13027606	+	Transcription	Molecular Function: RNA binding (GO:0003723);	K12741	General function prediction only	RNA recognition motif. (a.k.a. RRM, RBD, or RNP domain)	UBP1-associated protein 2A OS=Arabidopsis thaliana OX=3702 GN=UBA2A PE=1 SV=1	Putative nucleotide-binding alpha-beta plait domain-containing protein OS=Rosa chinensis OX=74649 GN=RchiOBHm_Chr2g0116621 PE=4 SV=1	RNA processing and modification	UBP1-associated protein 2B-like [Fragaria vesca subsp. vesca]
							augustus_masked-Fvb1-4-processed-gene-131.0	13096977	13097378	-	Replication, recombination and repair	Molecular Function: magnesium ion binding (GO:0000287);; Biological Process: DNA catabolic process, endonucleolytic (GO:0000737);; Molecular Function: DNA binding (GO:0003677);; Molecular Function: DNA topoisomerase type II (double strand cut, ATP-hydrolyzing) activity (GO:0003918);; Molecular Function: ATP binding (GO:0005524);; Cellular Component: nucleus (GO:0005634);; Cellular Component: chro…	K10878	Replication, recombination and repair	--	DNA topoisomerase 6 subunit A OS=Arabidopsis thaliana OX=3702 GN=TOP6A PE=1 SV=1	DNA topoisomerase 6 subunit A OS=Rosa chinensis OX=74649 GN=TOP6A PE=3 SV=1	Replication, recombination and repair	DNA topoisomerase 6 subunit A [Fragaria vesca subsp. vesca]
							augustus_masked-Fvb1-4-processed-gene-131.1	13097463	13098245	-	Replication, recombination and repair	Molecular Function: magnesium ion binding (GO:0000287);; Biological Process: DNA catabolic process, endonucleolytic (GO:0000737);; Molecular Function: DNA binding (GO:0003677);; Molecular Function: DNA topoisomerase type II (double strand cut, ATP-hydrolyzing) activity (GO:0003918);; Molecular Function: ATP binding (GO:0005524);; Cellular Component: nucleus (GO:0005634);; Cellular Component: chro…	K10878	Replication, recombination and repair	Type IIB DNA topoisomerase	DNA topoisomerase 6 subunit A OS=Arabidopsis thaliana OX=3702 GN=TOP6A PE=1 SV=1	DNA topoisomerase 6 subunit A OS=Rosa chinensis OX=74649 GN=TOP6A PE=3 SV=1	Replication, recombination and repair	DNA topoisomerase 6 subunit A [Fragaria vesca subsp. vesca]
							maker-Fvb1-4-augustus-gene-130.30	13004705	13011334	+	Translation, ribosomal structure and biogenesis	Molecular Function: GTP binding (GO:0005525);	K06944	Signal transduction mechanisms	C-terminal region of MMR_HSR1 domain	Developmentally-regulated G-protein 3 OS=Arabidopsis thaliana OX=3702 GN=DRG3 PE=1 SV=1	Putative GTP binding protein, second OS=Rosa chinensis OX=74649 GN=RchiOBHm_Chr2g0116591 PE=4 SV=1	Function unknown	developmentally-regulated G-protein 3 [Rosa chinensis]
							maker-Fvb1-4-augustus-gene-130.31	13029810	13036487	+	General function prediction only	Molecular Function: ATP binding (GO:0005524);; Molecular Function: ATPase activity (GO:0016887);	K06185	General function prediction only	ABC transporter	ABC transporter F family member 5 OS=Arabidopsis thaliana OX=3702 GN=ABCF5 PE=2 SV=1	Putative adenosinetriphosphatase OS=Rosa chinensis OX=74649 GN=RchiOBHm_Chr2g0116631 PE=4 SV=1	Function unknown	ABC transporter F family member 5-like [Fragaria vesca subsp. vesca]
							maker-Fvb1-4-augustus-gene-130.33	13075768	13077599	+	--	Molecular Function: DNA binding (GO:0003677);; Cellular Component: nucleus (GO:0005634);	--	--	B3 DNA binding domain	B3 domain-containing protein At2g16210 OS=Arabidopsis thaliana OX=3702 GN=At2g16210 PE=2 SV=1	Putative transcription factor B3-Domain family OS=Rosa chinensis OX=74649 GN=RchiOBHm_Chr4g0425711 PE=4 SV=1	Transcription	B3 domain-containing protein Os01g0723500-like [Fragaria vesca subsp. vesca]
							maker-Fvb1-4-augustus-gene-130.37	13036828	13038426	-	Carbohydrate transport and metabolism	Molecular Function: polygalacturonase activity (GO:0004650);; Cellular Component: extracellular region (GO:0005576);; Biological Process: carbohydrate metabolic process (GO:0005975);; Biological Process: cell wall organization (GO:0071555);	K01184	--	Glycosyl hydrolases family 28	Polygalacturonase OS=Prunus persica OX=3760 PE=2 SV=1	Putative polygalacturonase OS=Rosa chinensis OX=74649 GN=RchiOBHm_Chr2g0116851 PE=3 SV=1	Carbohydrate transport and metabolism	polygalacturonase-like [Fragaria vesca subsp. vesca]
							maker-Fvb1-4-augustus-gene-130.38	13053462	13055314	-	--	Molecular Function: threonine-type endopeptidase activity (GO:0004298);; Cellular Component: proteasome core complex (GO:0005839);; Biological Process: proteolysis involved in cellular protein catabolic process (GO:0051603);	--	--	Proteasome subunit	--	--	--	uncharacterized protein LOC105351607 isoform X2 [Fragaria vesca subsp. vesca]
							maker-Fvb1-4-augustus-gene-130.39	13061135	13063121	-	--	--	--	--	--	--	--	Replication, recombination and repair	uncharacterized protein LOC101297450 [Fragaria vesca subsp. vesca]
							maker-Fvb1-4-augustus-gene-131.37	13124536	13126653	-
							maker-Fvb1-4-augustus-gene-131.38	13129598	13131593	-	--	Molecular Function: nucleotide binding (GO:0000166);; Molecular Function: DNA-directed 5'-3' RNA polymerase activity (GO:0003899);; Biological Process: DNA-templated transcription, initiation (GO:0006352);; Cellular Component: RNA polymerase complex (GO:0030880);	K03012	Transcription	RNA polymerase Rpb4	DNA-directed RNA polymerase II subunit 4 OS=Arabidopsis thaliana OX=3702 GN=NRPB4 PE=1 SV=1	Putative DNA-directed RNA polymerase OS=Rosa chinensis OX=74649 GN=RchiOBHm_Chr2g0117051 PE=4 SV=1	Transcription	DNA-directed RNA polymerase II subunit 4 [Fragaria vesca subsp. vesca]
							maker-Fvb1-4-snap-gene-130.45	13057483	13058047	+	--	Molecular Function: structural constituent of ribosome (GO:0003735);; Cellular Component: ribosome (GO:0005840);; Biological Process: translation (GO:0006412);	K02873	Translation, ribosomal structure and biogenesis	Ribosomal protein L13e	60S ribosomal protein L13-1 OS=Arabidopsis thaliana OX=3702 GN=RPL13B PE=1 SV=1	60S ribosomal protein L13 OS=Rosa chinensis OX=74649 GN=RchiOBHm_Chr2g0116901 PE=3 SV=1	Translation, ribosomal structure and biogenesis	60S ribosomal protein L13-1-like [Rosa chinensis]
							maker-Fvb1-4-snap-gene-130.49	13014611	13018031	-	--	--	K12833	--	--	--	AvrRpt-cleavage domain-containing protein OS=Rosa chinensis OX=74649 GN=RchiOBHm_Chr2g0116611 PE=4 SV=1	--	uncharacterized protein LOC101298253 [Fragaria vesca subsp. vesca]
							maker-Fvb1-4-snap-gene-130.51	13039297	13041461	-	--	Molecular Function: protein kinase activity (GO:0004672);; Molecular Function: ATP binding (GO:0005524);	K07760	General function prediction only	--	Cyclin-dependent kinase B1-1 OS=Arabidopsis thaliana OX=3702 GN=CDKB1-1 PE=1 SV=2	Protein kinase domain-containing protein OS=Ensete ventricosum OX=4639 GN=B296_00005005 PE=4 SV=1	Signal transduction mechanisms	hypothetical protein B296_00005005 [Ensete ventricosum]
							maker-Fvb1-4-snap-gene-130.56	13069846	13072614	-
							maker-Fvb1-4-snap-gene-131.44	13118571	13122876	+	--	Cellular Component: cytoplasm (GO:0005737);	K14801	General function prediction only	Programmed cell death protein 2, C-terminal putative domain	--	Putative programmed cell death protein OS=Rosa chinensis OX=74649 GN=RchiOBHm_Chr2g0117041 PE=4 SV=1	Function unknown	programmed cell death protein 2-like [Fragaria vesca subsp. vesca]
							maker-Fvb1-4-snap-gene-131.46	13103998	13118374	-	Replication, recombination and repair	Molecular Function: nucleotide binding (GO:0000166);; Molecular Function: DNA binding (GO:0003677);; Molecular Function: DNA-directed DNA polymerase activity (GO:0003887);; Cellular Component: nucleus (GO:0005634);; Biological Process: DNA replication (GO:0006260);; Molecular Function: metal ion binding (GO:0046872);; Molecular Function: 4 iron, 4 sulfur cluster binding (GO:0051539);	K02320	Replication, recombination and repair	DNA polymerase family B	DNA polymerase alpha catalytic subunit OS=Oryza sativa subsp. japonica OX=39947 GN=Os01g0868300 PE=2 SV=2	DNA polymerase OS=Rosa chinensis OX=74649 GN=RchiOBHm_Chr2g0117021 PE=3 SV=1	Replication, recombination and repair	DNA polymerase alpha catalytic subunit [Fragaria vesca subsp. vesca]
							snap_masked-Fvb1-4-processed-gene-130.21	13047521	13052086	+	--	--	--	--	--	--	Uncharacterized protein OS=Rosa chinensis OX=74649 GN=RchiOBHm_Chr2g0116871 PE=4 SV=1	--	uncharacterized protein LOC101295168 isoform X2 [Fragaria vesca subsp. vesca]
Fvb1-4	14710001	14870000	159999	23	0.508182	2.38815
							augustus_masked-Fvb1-4-processed-gene-147.10	14716969	14722798	-	--	Cellular Component: integral component of membrane (GO:0016021);	K23877	--	GDSL/SGNH-like Acyl-Esterase family found in Pmr5 and Cas1p	Protein trichome birefringence-like 14 OS=Arabidopsis thaliana OX=3702 GN=TBL14 PE=2 SV=1	Putative PMR5 domain, PC-Esterase OS=Rosa chinensis OX=74649 GN=RchiOBHm_Chr2g0121951 PE=3 SV=1	Function unknown	protein trichome birefringence-like 14 [Fragaria vesca subsp. vesca]
							augustus_masked-Fvb1-4-processed-gene-147.12	14754251	14763077	-	Nucleotide transport and metabolism	Molecular Function: IMP cyclohydrolase activity (GO:0003937);; Molecular Function: phosphoribosylaminoimidazolecarboxamide formyltransferase activity (GO:0004643);; Biological Process: purine nucleotide biosynthetic process (GO:0006164);	K00602	Nucleotide transport and metabolism	AICARFT/IMPCHase bienzyme	--	AICAR transformylase OS=Rosa chinensis OX=74649 GN=RchiOBHm_Chr2g0124681 PE=3 SV=1	Nucleotide transport and metabolism	bifunctional purine biosynthesis protein purH-like [Fragaria vesca subsp. vesca]
							augustus_masked-Fvb1-4-processed-gene-147.14	14785697	14787307	-	--	Cellular Component: integral component of membrane (GO:0016021);	--	--	--	Protein CPR-5 OS=Arabidopsis thaliana OX=3702 GN=CPR5 PE=1 SV=1	Uncharacterized protein OS=Rosa chinensis OX=74649 GN=RchiOBHm_Chr2g0116221 PE=4 SV=1	Function unknown	protein CPR-5-like [Fragaria vesca subsp. vesca]
							augustus_masked-Fvb1-4-processed-gene-147.2	14711513	14713420	+	Defense mechanisms	Molecular Function: molecular_function (GO:0003674);; Molecular Function: catalytic activity (GO:0003824);; Molecular Function: transporter activity (GO:0005215);; Molecular Function: ATP binding (GO:0005524);; Cellular Component: cellular_component (GO:0005575);; Cellular Component: obsolete cell (GO:0005623);; Cellular Component: plasma membrane (GO:0005886);; Biological Process: transport (GO:…	K05681	Secondary metabolites biosynthesis, transport and catabolism	ABC-2 type transporter	ABC transporter G family member 5 OS=Arabidopsis thaliana OX=3702 GN=ABCG5 PE=2 SV=1	ABC transporter G family member 5 OS=Morella rubra OX=262757 GN=CJ030_MR6G010844 PE=4 SV=1	Secondary metabolites biosynthesis, transport and catabolism	ABC transporter G family member 5 [Fragaria vesca subsp. vesca]
							augustus_masked-Fvb1-4-processed-gene-147.6	14776439	14777161	+	--	Cellular Component: nucleus (GO:0005634);; Biological Process: regulation of transcription, DNA-templated (GO:0006355);; Molecular Function: sequence-specific DNA binding (GO:0043565);; Molecular Function: protein heterodimerization activity (GO:0046982);	K08065	Transcription	Histone-like transcription factor (CBF/NF-Y) and archaeal histone	Nuclear transcription factor Y subunit B-7 OS=Arabidopsis thaliana OX=3702 GN=NFYB7 PE=1 SV=1	Putative transcription factor Hap3/NF-YB family OS=Rosa chinensis OX=74649 GN=RchiOBHm_Chr2g0121991 PE=3 SV=1	Chromatin structure and dynamics	nuclear transcription factor Y subunit B-7 [Fragaria vesca subsp. vesca]
							augustus_masked-Fvb1-4-processed-gene-147.7	14779587	14780867	+	Posttranslational modification, protein turnover, chaperones	Cellular Component: extracellular space (GO:0005615);	K13963	Defense mechanisms	Serpin (serine protease inhibitor)	Serpin-ZX OS=Arabidopsis thaliana OX=3702 GN=At1g47710 PE=1 SV=1	Putative Serpin family protein OS=Rosa chinensis OX=74649 GN=RchiOBHm_Chr2g0122001 PE=3 SV=1	Defense mechanisms	serpin-ZX-like isoform X1 [Fragaria vesca subsp. vesca]
							augustus_masked-Fvb1-4-processed-gene-147.8	14787475	14788417	+	--	Biological Process: reproduction (GO:0000003);; Biological Process: regionalization (GO:0003002);; Biological Process: developmental process involved in reproduction (GO:0003006);; Molecular Function: molecular_function (GO:0003674);; Molecular Function: binding (GO:0005488);; Molecular Function: protein binding (GO:0005515);; Cellular Component: cellular_component (GO:0005575);; Cellular Compone…	--	Signal transduction mechanisms	CS domain	Protein BOBBER 1 OS=Arabidopsis thaliana OX=3702 GN=BOB1 PE=1 SV=1	Putative HSP20-like chaperone OS=Rosa chinensis OX=74649 GN=RchiOBHm_Chr2g0117791 PE=4 SV=1	Signal transduction mechanisms	protein BOBBER 1-like [Fragaria vesca subsp. vesca]
							augustus_masked-Fvb1-4-processed-gene-148.0	14793840	14795026	+	Posttranslational modification, protein turnover, chaperones	Cellular Component: extracellular space (GO:0005615);	K13963	Defense mechanisms	Serpin (serine protease inhibitor)	Serpin-ZX OS=Arabidopsis thaliana OX=3702 GN=At1g47710 PE=1 SV=1	Putative Serpin family protein OS=Rosa chinensis OX=74649 GN=RchiOBHm_Chr2g0122001 PE=3 SV=1	Defense mechanisms	putative Serpin family protein [Rosa chinensis]
							augustus_masked-Fvb1-4-processed-gene-148.10	14865551	14876800	-	Replication, recombination and repair	Molecular Function: DNA binding (GO:0003677);; Molecular Function: DNA topoisomerase type I (single strand cut, ATP-independent) activity (GO:0003917);; Cellular Component: chromosome (GO:0005694);; Biological Process: DNA topological change (GO:0006265);; Molecular Function: zinc ion binding (GO:0008270);	K03165	Replication, recombination and repair	DNA topoisomerase	DNA topoisomerase 3-alpha OS=Arabidopsis thaliana OX=3702 GN=TOP3A PE=1 SV=1	DNA topoisomerase OS=Rosa chinensis OX=74649 GN=RchiOBHm_Chr2g0122231 PE=3 SV=1	Replication, recombination and repair	DNA topoisomerase 3-alpha isoform X1 [Fragaria vesca subsp. vesca]
							augustus_masked-Fvb1-4-processed-gene-148.4	14844378	14844740	+	--	Cellular Component: integral component of membrane (GO:0016021);	--	--	--	--	Uncharacterized protein OS=Rosa chinensis OX=74649 GN=RchiOBHm_Chr2g0122171 PE=4 SV=1	--	hypothetical protein RchiOBHm_Chr2g0122171 [Rosa chinensis]
							maker-Fvb1-4-augustus-gene-147.31	14715386	14716692	+	--	--	--	--	--	--	Uncharacterized protein OS=Rosa chinensis OX=74649 GN=RchiOBHm_Chr2g0121941 PE=4 SV=1	--	uncharacterized protein LOC101295653 [Fragaria vesca subsp. vesca]
							maker-Fvb1-4-augustus-gene-147.34	14733551	14745290	+	--	Cellular Component: integral component of membrane (GO:0016021);; Molecular Function: transmembrane transporter activity (GO:0022857);	K12818	General function prediction only	--	Protein ZINC INDUCED FACILITATOR 1 OS=Arabidopsis thaliana OX=3702 GN=ZIF1 PE=1 SV=2	Putative major facilitator superfamily OS=Rosa chinensis OX=74649 GN=RchiOBHm_Chr1g0330291 PE=4 SV=1	Function unknown	protein ZINC INDUCED FACILITATOR 1-like [Fragaria vesca subsp. vesca]
							maker-Fvb1-4-augustus-gene-147.35	14750272	14753544	+	Energy production and conversion	Molecular Function: phosphoenolpyruvate carboxykinase (ATP) activity (GO:0004612);; Molecular Function: ATP binding (GO:0005524);; Biological Process: gluconeogenesis (GO:0006094);	K01610	--	Phosphoenolpyruvate carboxykinase	Phosphoenolpyruvate carboxykinase (ATP) 1 OS=Urochloa panicoides OX=37563 GN=PCK1 PE=1 SV=1	Phosphoenolpyruvate carboxykinase (ATP) OS=Rosa chinensis OX=74649 GN=RchiOBHm_Chr2g0109721 PE=3 SV=1	Signal transduction mechanisms	phosphoenolpyruvate carboxykinase [ATP]-like, partial [Fragaria vesca subsp. vesca]	Liao et al., 2021
							maker-Fvb1-4-augustus-gene-147.36	14781465	14784112	+	--	--	--	--	--	--	--	--	uncharacterized protein LOC101299806 [Fragaria vesca subsp. vesca]
							maker-Fvb1-4-augustus-gene-148.22	14817505	14832823	+	Replication, recombination and repair	Molecular Function: nucleotide binding (GO:0000166);; Molecular Function: DNA binding (GO:0003677);; Molecular Function: DNA-directed DNA polymerase activity (GO:0003887);; Cellular Component: nucleus (GO:0005634);; Biological Process: DNA replication (GO:0006260);; Molecular Function: metal ion binding (GO:0046872);; Molecular Function: 4 iron, 4 sulfur cluster binding (GO:0051539);	K02327	Replication, recombination and repair	DNA polymerase family B	DNA polymerase delta catalytic subunit OS=Oryza sativa subsp. japonica OX=39947 GN=POLD1 PE=2 SV=1	DNA polymerase OS=Rosa chinensis OX=74649 GN=RchiOBHm_Chr2g0122111 PE=3 SV=1	Replication, recombination and repair	DNA polymerase delta catalytic subunit [Fragaria vesca subsp. vesca]
							maker-Fvb1-4-augustus-gene-148.23	14846231	14855205	+	Function unknown	Molecular Function: DNA helicase activity (GO:0003678);; Molecular Function: ATP binding (GO:0005524);	K20093	--	SNF2 family N-terminal domain	Protein CHROMATIN REMODELING 24 OS=Arabidopsis thaliana OX=3702 GN=CHR24 PE=2 SV=1	Putative DNA helicase chromatin remodeling SNF2 family OS=Rosa chinensis OX=74649 GN=RchiOBHm_Chr2g0122191 PE=4 SV=1	--	protein CHROMATIN REMODELING 24 [Fragaria vesca subsp. vesca]
							maker-Fvb1-4-augustus-gene-148.24	14796023	14803631	-	--	Molecular Function: dolichol kinase activity (GO:0004168);; Cellular Component: integral component of membrane (GO:0016021);; Biological Process: dolichyl monophosphate biosynthetic process (GO:0043048);	K00902	Lipid transport and metabolism	--	Dolichol kinase EVAN OS=Arabidopsis thaliana OX=3702 GN=EVN PE=2 SV=1	Dolichol kinase OS=Rosa chinensis OX=74649 GN=RchiOBHm_Chr2g0122071 PE=3 SV=1	Lipid transport and metabolism	dolichol kinase [Fragaria vesca subsp. vesca]
							maker-Fvb1-4-augustus-gene-148.26	14841798	14843923	-	--	Molecular Function: phosphoprotein phosphatase activity (GO:0004721);; Molecular Function: metal ion binding (GO:0046872);	K17506	Signal transduction mechanisms	Protein phosphatase 2C	Probable protein phosphatase 2C 35 OS=Arabidopsis thaliana OX=3702 GN=At3g06270 PE=2 SV=1	Protein-serine/threonine phosphatase OS=Rosa chinensis OX=74649 GN=RchiOBHm_Chr4g0419711 PE=3 SV=1	Signal transduction mechanisms	probable protein phosphatase 2C 35 [Fragaria vesca subsp. vesca]
							maker-Fvb1-4-augustus-gene-148.27	14856577	14860610	-	Cell wall/membrane/envelope biogenesis	Molecular Function: protein kinase activity (GO:0004672);; Molecular Function: ATP binding (GO:0005524);	K13430	--	Protein kinase domain	Receptor-like cytosolic serine/threonine-protein kinase RBK2 OS=Arabidopsis thaliana OX=3702 GN=RBK2 PE=1 SV=1	Protein kinase domain-containing protein OS=Rosa chinensis OX=74649 GN=RchiOBHm_Chr2g0122201 PE=4 SV=1	Signal transduction mechanisms	probable receptor-like serine/threonine-protein kinase At5g57670 [Fragaria vesca subsp. vesca]
							maker-Fvb1-4-snap-gene-147.43	14728014	14729189	+
							maker-Fvb1-4-snap-gene-147.52	14724123	14728052	-
							maker-Fvb1-4-snap-gene-148.32	14845559	14845910	+
							maker-Fvb1-4-snap-gene-148.34	14833340	14839724	-	--	Biological Process: response to acid chemical (GO:0001101);; Molecular Function: molecular_function (GO:0003674);; Molecular Function: catalytic activity (GO:0003824);; Molecular Function: ubiquitin-protein transferase activity (GO:0004842);; Cellular Component: cellular_component (GO:0005575);; Cellular Component: intracellular (GO:0005622);; Cellular Component: obsolete cell (GO:0005623);; Cell…	K16280	Signal transduction mechanisms	Copine	E3 ubiquitin-protein ligase RGLG3 OS=Arabidopsis thaliana OX=3702 GN=RGLG3 PE=1 SV=1	Putative transcription factor C2H2 family OS=Rosa chinensis OX=74649 GN=RchiOBHm_Chr2g0122151 PE=4 SV=1	Posttranslational modification, protein turnover, chaperones	E3 ubiquitin-protein ligase RGLG1 isoform X1 [Fragaria vesca subsp. vesca]
Fvb1-4	16140001	16410000	269999	29	0.5434	2.83458
							augustus_masked-Fvb1-4-processed-gene-161.3	16152192	16153433	+	--	Cellular Component: nucleus (GO:0005634);; Molecular Function: NAD-dependent histone deacetylase activity (H3-K14 specific) (GO:0032041);; Molecular Function: metal ion binding (GO:0046872);	K06067	Chromatin structure and dynamics	Histone deacetylase domain	Histone deacetylase 6 OS=Arabidopsis thaliana OX=3702 GN=HDA6 PE=1 SV=1	Histone deacetylase OS=Parasponia andersonii OX=3476 GN=PanWU01x14_066540 PE=3 SV=1	Chromatin structure and dynamics	histone deacetylase 6-like [Fragaria vesca subsp. vesca]
							augustus_masked-Fvb1-4-processed-gene-161.9	16167417	16167983	-
							augustus_masked-Fvb1-4-processed-gene-163.4	16380206	16380766	+
							augustus_masked-Fvb1-4-processed-gene-163.5	16382436	16384946	+	--	Molecular Function: inorganic diphosphatase activity (GO:0004427);; Molecular Function: phosphatase activity (GO:0016791);; Molecular Function: metal ion binding (GO:0046872);	K13248	General function prediction only	Putative Phosphatase	Inorganic pyrophosphatase 2 OS=Arabidopsis thaliana OX=3702 GN=At1g17710 PE=2 SV=1	Putative inorganic diphosphatase OS=Rosa chinensis OX=74649 GN=RchiOBHm_Chr2g0142571 PE=4 SV=1	Function unknown	hypothetical protein CMV_004048 [Castanea mollissima]
							augustus_masked-Fvb1-4-processed-gene-163.7	16328091	16328468	-
							maker-Fvb1-4-augustus-gene-161.32	16160786	16165093	-	--	Molecular Function: DNA binding (GO:0003677);	K10398	Transcription	GYF domain	Uncharacterized protein At5g08430 OS=Arabidopsis thaliana OX=3702 GN=At5g08430 PE=1 SV=2	PREDICTED: At5g08430 OS=Prunus dulcis OX=3755 GN=ALMOND_2B026909 PE=4 SV=1	Transcription	uncharacterized protein At5g08430 [Fragaria vesca subsp. vesca]
							maker-Fvb1-4-augustus-gene-161.33	16171700	16179546	-	--	Biological Process: double-strand break repair via homologous recombination (GO:0000724);	K08775	Replication, recombination and repair	BRCA2, oligonucleotide/oligosaccharide-binding, domain 1	Protein BREAST CANCER SUSCEPTIBILITY 2 homolog B OS=Arabidopsis thaliana OX=3702 GN=BRCA2B PE=1 SV=1	Putative breast cancer type 2 susceptibility protein OS=Rosa chinensis OX=74649 GN=RchiOBHm_Chr3g0484931 PE=4 SV=1	Replication, recombination and repair	protein BREAST CANCER SUSCEPTIBILITY 2 homolog A-like [Fragaria vesca subsp. vesca]
							maker-Fvb1-4-augustus-gene-161.34	16181269	16185055	-	--	--	K14536	--	--	Protein AMEIOTIC 1 OS=Zea mays OX=4577 GN=AM1 PE=2 SV=1	Uncharacterized protein OS=Rosa chinensis OX=74649 GN=RchiOBHm_Chr3g0484951 PE=4 SV=1	Function unknown	protein DYAD [Fragaria vesca subsp. vesca]
							maker-Fvb1-4-augustus-gene-162.26	16199767	16216065	+	General function prediction only	Molecular Function: ATP binding (GO:0005524);; Cellular Component: integral component of membrane (GO:0016021);; Molecular Function: ATPase activity (GO:0016887);; Molecular Function: ATPase-coupled transmembrane transporter activity (GO:0042626);	K05677	--	ABC transporter transmembrane region 2	ABC transporter D family member 1 OS=Arabidopsis thaliana OX=3702 GN=ABCD1 PE=1 SV=1	Putative fatty-acyl-CoA-transporting ATPase OS=Rosa chinensis OX=74649 GN=RchiOBHm_Chr3g0484971 PE=4 SV=1	Lipid transport and metabolism	ABC transporter D family member 1 [Fragaria vesca subsp. vesca]
							maker-Fvb1-4-augustus-gene-162.28	16225077	16231656	+	Signal transduction mechanisms	Molecular Function: voltage-gated chloride channel activity (GO:0005247);; Cellular Component: integral component of membrane (GO:0016021);	K05016	Inorganic ion transport and metabolism	Voltage gated chloride channel	Chloride channel protein CLC-c OS=Arabidopsis thaliana OX=3702 GN=CLC-C PE=1 SV=1	Putative chloride channel, voltage gated OS=Rosa chinensis OX=74649 GN=RchiOBHm_Chr3g0484991 PE=3 SV=1	Inorganic ion transport and metabolism	chloride channel protein CLC-c [Fragaria vesca subsp. vesca]
							maker-Fvb1-4-augustus-gene-162.29	16232441	16235399	+	--	Biological Process: ribosomal subunit export from nucleus (GO:0000054);; Biological Process: ribosomal small subunit export from nucleus (GO:0000056);; Cellular Component: cellular_component (GO:0005575);; Biological Process: RNA localization (GO:0006403);; Biological Process: RNA export from nucleus (GO:0006405);; Biological Process: protein export from nucleus (GO:0006611);; Biological Process:…	--	--	Ankyrin repeats (many copies)	--	Putative ankyrin repeat-containing domain-containing protein OS=Rosa chinensis OX=74649 GN=RchiOBHm_Chr3g0485011 PE=4 SV=1	Function unknown	ankyrin repeat-containing protein P16F5.05c [Fragaria vesca subsp. vesca]
							maker-Fvb1-4-augustus-gene-162.33	16267105	16269166	+	--	Molecular Function: DNA binding (GO:0003677);; Cellular Component: nucleus (GO:0005634);; Biological Process: regulation of transcription, DNA-templated (GO:0006355);	--	--	Dof domain, zinc finger	Dof zinc finger protein DOF2.5 OS=Arabidopsis thaliana OX=3702 GN=DOF2.5 PE=2 SV=3	Putative transcription factor C2C2-Dof family OS=Rosa chinensis OX=74649 GN=RchiOBHm_Chr3g0485041 PE=4 SV=1	--	uncharacterized protein LOC101292636 [Fragaria vesca subsp. vesca]
							maker-Fvb1-4-augustus-gene-162.35	16230429	16232887	-	--	Cellular Component: nucleus (GO:0005634);; Molecular Function: protein-lysine N-methyltransferase activity (GO:0016279);; Biological Process: peptidyl-lysine monomethylation (GO:0018026);	K05302	General function prediction only	SET domain	--	N-lysine methyltransferase OS=Prunus persica OX=3760 GN=PRUPE_4G288100 PE=3 SV=1	Replication, recombination and repair	ribosomal lysine N-methyltransferase 3 [Fragaria vesca subsp. vesca]
							maker-Fvb1-4-augustus-gene-162.36	16255440	16258888	-	--	Biological Process: protein transport (GO:0015031);; Cellular Component: integral component of membrane (GO:0016021);; Biological Process: vesicle-mediated transport (GO:0016192);	--	Intracellular trafficking, secretion, and vesicular transport	Got1/Sft2-like family	--	Vesicle transport protein OS=Rosa chinensis OX=74649 GN=RchiOBHm_Chr3g0485031 PE=3 SV=1	Intracellular trafficking, secretion, and vesicular transport	vesicle transport protein SFT2B [Fragaria vesca subsp. vesca]
							maker-Fvb1-4-augustus-gene-163.20	16298825	16299914	+	Translation, ribosomal structure and biogenesis	Molecular Function: structural constituent of ribosome (GO:0003735);; Cellular Component: ribosome (GO:0005840);; Biological Process: translation (GO:0006412);	--	Posttranslational modification, protein turnover, chaperones	Ribosomal L18 of archaea, bacteria, mitoch. and chloroplast	--	Putative ribosomal protein L18 OS=Rosa chinensis OX=74649 GN=RchiOBHm_Chr6g0270961 PE=4 SV=1	Translation, ribosomal structure and biogenesis	uncharacterized protein LOC101293822 [Fragaria vesca subsp. vesca]
							maker-Fvb1-4-augustus-gene-163.21	16301353	16305127	+	Nucleotide transport and metabolism	Molecular Function: amidophosphoribosyltransferase activity (GO:0004044);; Biological Process: 'de novo' IMP biosynthetic process (GO:0006189);; Biological Process: purine nucleobase biosynthetic process (GO:0009113);; Biological Process: nucleoside metabolic process (GO:0009116);; Molecular Function: metal ion binding (GO:0046872);; Molecular Function: iron-sulfur cluster binding (GO:0051536);	K00764	Nucleotide transport and metabolism	Glutamine amidotransferase domain	Amidophosphoribosyltransferase 1, chloroplastic OS=Arabidopsis thaliana OX=3702 GN=ASE1 PE=2 SV=1	Amidophosphoribosyltransferase OS=Rosa chinensis OX=74649 GN=RchiOBHm_Chr6g0268481 PE=3 SV=1	Nucleotide transport and metabolism	amidophosphoribosyltransferase, chloroplastic-like [Fragaria vesca subsp. vesca]
							maker-Fvb1-4-augustus-gene-163.22	16347872	16354009	+	Carbohydrate transport and metabolism	Biological Process: carbohydrate transport (GO:0008643);; Cellular Component: integral component of membrane (GO:0016021);; Molecular Function: transmembrane transporter activity (GO:0022857);	K08150	General function prediction only	Sugar (and other) transporter	Plastidic glucose transporter 4 OS=Arabidopsis thaliana OX=3702 GN=At5g16150 PE=1 SV=2	Putative major facilitator, sugar transporter, major facilitator superfamily OS=Rosa chinensis OX=74649 GN=RchiOBHm_Chr3g0485241 PE=3 SV=1	Intracellular trafficking, secretion, and vesicular transport	plastidic glucose transporter 4 [Fragaria vesca subsp. vesca]
							maker-Fvb1-4-augustus-gene-163.23	16354568	16361605	+	--	Molecular Function: metal ion binding (GO:0046872);	--	General function prediction only	PHD-finger	PHD finger protein At1g33420 OS=Arabidopsis thaliana OX=3702 GN=At1g33420 PE=1 SV=1	Putative chromatin regulator PHD family OS=Rosa chinensis OX=74649 GN=RchiOBHm_Chr3g0485271 PE=4 SV=1	Function unknown	PHD finger protein At1g33420-like [Fragaria vesca subsp. vesca]
							maker-Fvb1-4-snap-gene-161.36	16142305	16142581	+	--	Molecular Function: DNA binding (GO:0003677);	--	--	Domain of unknown function (DUF4413)	--	BED-type domain-containing protein OS=Prunus persica OX=3760 GN=PRUPE_8G039800 PE=4 SV=1	--	hypothetical protein PRUPE_8G039800 [Prunus persica]
							maker-Fvb1-4-snap-gene-161.41	16160104	16160750	+	--	--	--	--	--	VQ motif-containing protein 31 OS=Arabidopsis thaliana OX=3702 GN=VQ31 PE=1 SV=1	VQ domain-containing protein OS=Rosa chinensis OX=74649 GN=RchiOBHm_Chr3g0484901 PE=4 SV=1	Function unknown	uncharacterized protein LOC105353062 [Fragaria vesca subsp. vesca]
							maker-Fvb1-4-snap-gene-162.40	16219008	16220471	+	--	Molecular Function: RNA binding (GO:0003723);	K07574	--	CRS1 / YhbY (CRM) domain	--	Putative RNA-binding, CRM domain-containing protein OS=Rosa chinensis OX=74649 GN=RchiOBHm_Chr6g0267071 PE=4 SV=1	Translation, ribosomal structure and biogenesis	uncharacterized protein LOC101295384 [Fragaria vesca subsp. vesca]
							maker-Fvb1-4-snap-gene-162.43	16244652	16253910	+	--	Biological Process: histone deacetylation (GO:0016575);	--	Function unknown	Histone deacetylation protein Rxt3	--	Putative histone deacetylation protein Rxt3 OS=Rosa chinensis OX=74649 GN=RchiOBHm_Chr3g0485021 PE=4 SV=1	Function unknown	uncharacterized protein LOC101291867 [Fragaria vesca subsp. vesca]
							maker-Fvb1-4-snap-gene-162.45	16222764	16223823	-
							maker-Fvb1-4-snap-gene-162.49	16273663	16277193	-	--	Molecular Function: cysteine-type endopeptidase activity (GO:0004197);; Biological Process: regulation of catalytic activity (GO:0050790);	K01363	Posttranslational modification, protein turnover, chaperones	Peptidase family C1 propeptide	Cathepsin B-like protease 3 OS=Arabidopsis thaliana OX=3702 GN=CATHB3 PE=1 SV=1	Putative cathepsin B OS=Rosa chinensis OX=74649 GN=RchiOBHm_Chr3g0485051 PE=3 SV=1	Posttranslational modification, protein turnover, chaperones	cathepsin B-like [Fragaria vesca subsp. vesca]
							maker-Fvb1-4-snap-gene-162.51	16281782	16284703	-	--	Biological Process: gene silencing by RNA (GO:0031047);	--	--	XS domain	Protein SUPPRESSOR OF GENE SILENCING 3 OS=Solanum lycopersicum OX=4081 GN=SGS3 PE=1 SV=1	Putative XS domain-containing protein OS=Rosa chinensis OX=74649 GN=RchiOBHm_Chr3g0485061 PE=4 SV=1	Function unknown	protein SUPPRESSOR OF GENE SILENCING 3 [Fragaria vesca subsp. vesca]
							maker-Fvb1-4-snap-gene-163.30	16292967	16298301	-	Translation, ribosomal structure and biogenesis	Molecular Function: aminoacyl-tRNA editing activity (GO:0002161);; Molecular Function: leucine-tRNA ligase activity (GO:0004823);; Molecular Function: ATP binding (GO:0005524);; Biological Process: leucyl-tRNA aminoacylation (GO:0006429);	K01869	Translation, ribosomal structure and biogenesis	tRNA synthetases class I (I, L, M and V)	Leucine--tRNA ligase, cytoplasmic OS=Arabidopsis thaliana OX=3702 GN=At1g09620 PE=1 SV=1	Leucyl-tRNA synthetase OS=Rosa chinensis OX=74649 GN=RchiOBHm_Chr1g0373331 PE=3 SV=1	Translation, ribosomal structure and biogenesis	leucine--tRNA ligase, cytoplasmic [Fragaria vesca subsp. vesca]
							maker-Fvb1-4-snap-gene-163.32	16372347	16373829	-	--	Biological Process: proteolysis (GO:0006508);; Molecular Function: cysteine-type peptidase activity (GO:0008234);; Cellular Component: integral component of membrane (GO:0016021);	--	--	Ulp1 protease family, C-terminal catalytic domain	--	Putative Ulp1 protease family catalytic domain-containing protein OS=Rosa chinensis OX=74649 GN=RchiOBHm_Chr5g0023941 PE=3 SV=1	--	putative Ulp1 protease family catalytic domain-containing protein [Rosa chinensis]
							maker-Fvb1-4-snap-gene-164.44	16397383	16399152	-	--	Biological Process: formation of cytoplasmic translation initiation complex (GO:0001732);; Molecular Function: translation initiation factor activity (GO:0003743);; Cellular Component: eukaryotic translation initiation factor 3 complex (GO:0005852);; Cellular Component: eukaryotic 43S preinitiation complex (GO:0016282);; Cellular Component: eukaryotic 48S preinitiation complex (GO:0033290);	K03246	--	Reverse transcriptase-like	Eukaryotic translation initiation factor 3 subunit I OS=Arabidopsis thaliana OX=3702 GN=TIF3I1 PE=2 SV=2	Eukaryotic translation initiation factor 3 subunit I OS=Rosa chinensis OX=74649 GN=RchiOBHm_Chr4g0445591 PE=3 SV=1	--	eukaryotic translation initiation factor 3 subunit I-like [Fragaria vesca subsp. vesca]
							snap_masked-Fvb1-4-processed-gene-163.17	16308285	16319693	-	--	--	--	--	--	--	Uncharacterized protein OS=Rosa chinensis OX=74649 GN=RchiOBHm_Chr3g0485101 PE=4 SV=1	Amino acid transport and metabolism	uncharacterized protein LOC101294305 isoform X2 [Fragaria vesca subsp. vesca]
Fvb1-4	16430001	16620000	189999	27	0.345132	2.77465
							augustus_masked-Fvb1-4-processed-gene-165.8	16522055	16524762	-	--	Cellular Component: histone acetyltransferase complex (GO:0000123);; Cellular Component: DNA-directed RNA polymerase complex (GO:0000428);; Molecular Function: molecular_function (GO:0003674);; Molecular Function: transcription coregulator activity (GO:0003712);; Molecular Function: transcription coactivator activity (GO:0003713);; Cellular Component: cellular_component (GO:0005575);; Cellular Co…	--	--	--	--	Putative transcription factor WD40-like family OS=Rosa chinensis OX=74649 GN=RchiOBHm_Chr2g0169041 PE=4 SV=1	Transcription	probable E3 ubiquitin ligase complex SCF subunit sconB [Fragaria vesca subsp. vesca]
							maker-Fvb1-4-augustus-gene-164.25	16429714	16432420	+	--	--	--	--	--	--	Uncharacterized protein OS=Rosa chinensis OX=74649 GN=RchiOBHm_Chr3g0485521 PE=4 SV=1	--	uncharacterized protein LOC101296327 [Fragaria vesca subsp. vesca]
							maker-Fvb1-4-augustus-gene-164.26	16452479	16455291	+	Posttranslational modification, protein turnover, chaperones	Molecular Function: peptidyl-prolyl cis-trans isomerase activity (GO:0003755);; Biological Process: protein folding (GO:0006457);	K03768	Posttranslational modification, protein turnover, chaperones	Cyclophilin type peptidyl-prolyl cis-trans isomerase/CLD	Peptidyl-prolyl cis-trans isomerase CYP20-3, chloroplastic OS=Arabidopsis thaliana OX=3702 GN=CYP20-3 PE=1 SV=1	Peptidyl-prolyl cis-trans isomerase OS=Rosa chinensis OX=74649 GN=RchiOBHm_Chr3g0485561 PE=3 SV=1	Posttranslational modification, protein turnover, chaperones	peptidyl-prolyl cis-trans isomerase [Fragaria vesca subsp. vesca]
							maker-Fvb1-4-augustus-gene-164.33	16451281	16453300	-	Translation, ribosomal structure and biogenesis	--	--	--	Polyketide cyclase / dehydrase and lipid transport	--	Putative START-like domain-containing protein OS=Rosa chinensis OX=74649 GN=RchiOBHm_Chr3g0485541 PE=3 SV=1	Function unknown	uncharacterized protein LOC101296612 isoform X2 [Fragaria vesca subsp. vesca]
							maker-Fvb1-4-augustus-gene-164.34	16454573	16456841	-	--	Molecular Function: pyridoxal phosphatase activity (GO:0033883);	K18551	General function prediction only	Haloacid dehalogenase-like hydrolase	--	Putative pyridoxal phosphatase OS=Rosa chinensis OX=74649 GN=RchiOBHm_Chr3g0485571 PE=4 SV=1	Function unknown	uncharacterized protein C24B11.05 [Fragaria vesca subsp. vesca]
							maker-Fvb1-4-augustus-gene-164.35	16476801	16481598	-	--	--	--	--	--	--	Uncharacterized protein OS=Rosa chinensis OX=74649 GN=RchiOBHm_Chr3g0485631 PE=4 SV=1	--	uncharacterized protein LOC101298068 [Fragaria vesca subsp. vesca]
							maker-Fvb1-4-augustus-gene-164.36	16482958	16484491	-	--	Cellular Component: extracellular region (GO:0005576);; Cellular Component: cell wall (GO:0005618);; Biological Process: plant-type cell wall organization (GO:0009664);; Cellular Component: membrane (GO:0016020);	K20628	--	Expansin C-terminal domain	Expansin-A7 OS=Arabidopsis thaliana OX=3702 GN=EXPA7 PE=3 SV=1	Expansin OS=Rosa chinensis OX=74649 GN=RchiOBHm_Chr7g0199891 PE=3 SV=1	Function unknown	expansin-A7 [Fragaria vesca subsp. vesca]
							maker-Fvb1-4-augustus-gene-164.37	16485528	16488590	-	--	Biological Process: vacuolar transport (GO:0007034);	K15053	Function unknown	Snf7	--	Putative Snf7 family protein OS=Rosa chinensis OX=74649 GN=RchiOBHm_Chr3g0485641 PE=4 SV=1	Intracellular trafficking, secretion, and vesicular transport	uncharacterized protein LOC101298368 [Fragaria vesca subsp. vesca]
							maker-Fvb1-4-augustus-gene-165.27	16526887	16530467	+	Coenzyme transport and metabolism	Molecular Function: oxygen-dependent protoporphyrinogen oxidase activity (GO:0004729);; Biological Process: protoporphyrinogen IX biosynthetic process (GO:0006782);	K00231	Coenzyme transport and metabolism	Flavin containing amine oxidoreductase	Protoporphyrinogen oxidase 1, chloroplastic OS=Arabidopsis thaliana OX=3702 GN=PPOX1 PE=1 SV=1	Protoporphyrinogen oxidase OS=Rosa chinensis OX=74649 GN=RchiOBHm_Chr3g0485661 PE=3 SV=1	Coenzyme transport and metabolism	protoporphyrinogen oxidase 1, chloroplastic [Fragaria vesca subsp. vesca]
							maker-Fvb1-4-augustus-gene-165.28	16550093	16553407	+	--	Molecular Function: DNA-binding transcription factor activity (GO:0003700);; Cellular Component: nucleus (GO:0005634);; Molecular Function: sequence-specific DNA binding (GO:0043565);	K18835	--	WRKY DNA -binding domain	WRKY transcription factor 42 OS=Arabidopsis thaliana OX=3702 GN=WRKY42 PE=1 SV=1	Putative transcription factor WRKY family OS=Rosa chinensis OX=74649 GN=RchiOBHm_Chr3g0485691 PE=4 SV=1	Transcription	probable WRKY transcription factor 47 isoform X1 [Fragaria vesca subsp. vesca]
							maker-Fvb1-4-augustus-gene-165.29	16555343	16559103	+	--	Cellular Component: integral component of membrane (GO:0016021);; Molecular Function: protein-cysteine S-palmitoyltransferase activity (GO:0019706);	K20027	General function prediction only	DHHC palmitoyltransferase	Protein S-acyltransferase 18 OS=Arabidopsis thaliana OX=3702 GN=PAT18 PE=2 SV=2	S-acyltransferase OS=Rosa chinensis OX=74649 GN=RchiOBHm_Chr3g0485751 PE=3 SV=1	Function unknown	protein S-acyltransferase 18 [Fragaria vesca subsp. vesca]
							maker-Fvb1-4-augustus-gene-165.30	16563169	16565331	+	--	Cellular Component: ribosome (GO:0005840);	--	--	Ribosomal protein L7Ae/L30e/S12e/Gadd45 family	--	Putative 50S ribosomal protein L30e OS=Rosa chinensis OX=74649 GN=RchiOBHm_Chr3g0485771 PE=4 SV=1	--	uncharacterized protein LOC101297670 [Fragaria vesca subsp. vesca]
							maker-Fvb1-4-augustus-gene-165.31	16582983	16585302	+	--	--	--	Function unknown	FAM192A/Fyv6, N-terminal domain	--	Nefa_Nip30_N domain-containing protein OS=Rosa chinensis OX=74649 GN=RchiOBHm_Chr3g0485921 PE=4 SV=1	Function unknown	protein FAM192A [Fragaria vesca subsp. vesca]
							maker-Fvb1-4-augustus-gene-165.33	16531027	16532506	-	Carbohydrate transport and metabolism	Molecular Function: chitinase activity (GO:0004568);; Biological Process: carbohydrate metabolic process (GO:0005975);; Biological Process: chitin catabolic process (GO:0006032);; Biological Process: cell wall macromolecule catabolic process (GO:0016998);	K20547	General function prediction only	Chitinase class I	Chitinase 10 OS=Oryza sativa subsp. japonica OX=39947 GN=Cht10 PE=2 SV=1	Putative chitinase OS=Rosa chinensis OX=74649 GN=RchiOBHm_Chr3g0485671 PE=4 SV=1	Function unknown	chitinase 10 [Fragaria vesca subsp. vesca]
							maker-Fvb1-4-augustus-gene-165.34	16557240	16562491	-	Carbohydrate transport and metabolism	Molecular Function: polygalacturonase activity (GO:0004650);; Cellular Component: extracellular region (GO:0005576);; Biological Process: carbohydrate metabolic process (GO:0005975);; Molecular Function: galacturan 1,4-alpha-galacturonidase activity (GO:0047911);; Biological Process: cell wall organization (GO:0071555);	K01184	--	Glycosyl hydrolases family 28	Probable polygalacturonase OS=Vitis vinifera OX=29760 GN=GSVIVT00026920001 PE=1 SV=1	Putative galacturan 1,4-alpha-galacturonidase OS=Rosa chinensis OX=74649 GN=RchiOBHm_Chr3g0485761 PE=3 SV=1	Carbohydrate transport and metabolism	probable polygalacturonase isoform X1 [Fragaria vesca subsp. vesca]
							maker-Fvb1-4-augustus-gene-165.35	16564198	16571572	-	Intracellular trafficking, secretion, and vesicular transport	Molecular Function: ATP binding (GO:0005524);; Biological Process: protein targeting (GO:0006605);; Cellular Component: membrane (GO:0016020);; Biological Process: protein import (GO:0017038);	K03070	--	SecA DEAD-like domain	Protein translocase subunit SECA1, chloroplastic OS=Arabidopsis thaliana OX=3702 GN=SECA1 PE=1 SV=2	Protein translocase subunit SecA OS=Rosa chinensis OX=74649 GN=RchiOBHm_Chr3g0485781 PE=3 SV=1	Energy production and conversion	protein translocase subunit SecA, chloroplastic [Fragaria vesca subsp. vesca]
							maker-Fvb1-4-augustus-gene-166.18	16591597	16598217	-	Defense mechanisms	Molecular Function: ATP binding (GO:0005524);; Cellular Component: integral component of membrane (GO:0016021);; Molecular Function: ATPase activity (GO:0016887);; Molecular Function: ATPase-coupled transmembrane transporter activity (GO:0042626);	K05658	Secondary metabolites biosynthesis, transport and catabolism	ABC transporter transmembrane region	ABC transporter B family member 11 OS=Arabidopsis thaliana OX=3702 GN=ABCB11 PE=2 SV=1	Putative xenobiotic-transporting ATPase OS=Rosa chinensis OX=74649 GN=RchiOBHm_Chr3g0485961 PE=4 SV=1	Secondary metabolites biosynthesis, transport and catabolism	ABC transporter B family member 11-like [Fragaria vesca subsp. vesca]
							maker-Fvb1-4-snap-gene-164.41	16464731	16472310	+	--	Molecular Function: hydrolase activity (GO:0016787);	K08869	General function prediction only	ABC1 family	Protein ABC transporter 1, mitochondrial OS=Arabidopsis thaliana OX=3702 GN=ABC1 PE=2 SV=1	Putative cadmium-transporting ATPase OS=Rosa chinensis OX=74649 GN=RchiOBHm_Chr3g0485611 PE=3 SV=1	Function unknown	aarF domain-containing protein kinase 4 [Fragaria vesca subsp. vesca]
							maker-Fvb1-4-snap-gene-164.43	16473248	16477454	+	--	Cellular Component: extracellular region (GO:0005576);; Cellular Component: cell wall (GO:0005618);; Cellular Component: integral component of membrane (GO:0016021);; Molecular Function: hydrolase activity (GO:0016787);; Biological Process: cell wall organization (GO:0071555);	K01280	Cell wall/membrane/envelope biogenesis	Pectinacetylesterase	Pectin acetylesterase 6 OS=Arabidopsis thaliana OX=3702 GN=PAE6 PE=2 SV=1	Pectin acetylesterase OS=Rosa chinensis OX=74649 GN=RchiOBHm_Chr3g0485621 PE=3 SV=1	Cell wall/membrane/envelope biogenesis	pectin acetylesterase 3 isoform X2 [Fragaria vesca subsp. vesca]
							maker-Fvb1-4-snap-gene-164.46	16433299	16435011	-	--	Molecular Function: calcium ion binding (GO:0005509);; Molecular Function: calcium-dependent phospholipid binding (GO:0005544);	K17098	Intracellular trafficking, secretion, and vesicular transport	Annexin	Annexin D7 OS=Arabidopsis thaliana OX=3702 GN=ANNAT7 PE=2 SV=1	Annexin OS=Rosa chinensis OX=74649 GN=RchiOBHm_Chr3g0485531 PE=3 SV=1	Intracellular trafficking, secretion, and vesicular transport	annexin D7-like [Fragaria vesca subsp. vesca]
							maker-Fvb1-4-snap-gene-165.37	16508043	16508380	+
							maker-Fvb1-4-snap-gene-165.39	16545936	16547986	+	--	Cellular Component: nucleus (GO:0005634);; Cellular Component: cytoplasm (GO:0005737);; Biological Process: protein transport (GO:0015031);; Molecular Function: ribosomal large subunit binding (GO:0043023);	K07562	Translation, ribosomal structure and biogenesis	NMD3 family	--	60S ribosomal export protein NMD3 OS=Rosa chinensis OX=74649 GN=RchiOBHm_Chr3g0485681 PE=3 SV=1	Translation, ribosomal structure and biogenesis	60S ribosomal export protein NMD3-like [Fragaria vesca subsp. vesca]
							maker-Fvb1-4-snap-gene-165.44	16495966	16502150	-	--	Biological Process: meiotic cell cycle (GO:0051321);	--	--	--	Meiosis-specific protein ASY3 OS=Arabidopsis thaliana OX=3702 GN=ASY3 PE=1 SV=1	Uncharacterized protein OS=Rosa chinensis OX=74649 GN=RchiOBHm_Chr3g0485651 PE=4 SV=1	Function unknown	uncharacterized protein LOC101301338 [Fragaria vesca subsp. vesca]
							maker-Fvb1-4-snap-gene-165.49	16571883	16578893	-	--	Cellular Component: endoplasmic reticulum membrane (GO:0005789);; Biological Process: intracellular protein transport (GO:0006886);; Biological Process: endoplasmic reticulum to Golgi vesicle-mediated transport (GO:0006888);; Molecular Function: zinc ion binding (GO:0008270);; Cellular Component: COPII vesicle coat (GO:0030127);	K01881	Intracellular trafficking, secretion, and vesicular transport	Sec23/Sec24 helical domain	--	Protein transport protein SEC23 OS=Rosa chinensis OX=74649 GN=RchiOBHm_Chr3g0485911 PE=3 SV=1	Intracellular trafficking, secretion, and vesicular transport	protein transport protein SEC23 [Fragaria vesca subsp. vesca]
							maker-Fvb1-4-snap-gene-165.52	16589152	16589794	-
							maker-Fvb1-4-snap-gene-166.21	16605253	16606144	+	--	--	--	General function prediction only	PPR repeat family	--	Uncharacterized protein OS=Malus domestica OX=3750 GN=DVH24_022310 PE=4 SV=1	Function unknown	hypothetical protein DVH24_022310 [Malus domestica]
							maker-Fvb1-4-snap-gene-166.22	16614636	16614951	+
Fvb1-4	16790001	17040000	249999	28	0.405212	2.63824
							augustus_masked-Fvb1-4-processed-gene-168.0	16799287	16800483	+	--	Molecular Function: hydrolase activity (GO:0016787);	K10706	RNA processing and modification	AAA domain	--	Putative P-loop containing nucleoside triphosphate hydrolase OS=Rosa chinensis OX=74649 GN=RchiOBHm_Chr3g0486161 PE=4 SV=1	RNA processing and modification	uncharacterized protein LOC101299040 [Fragaria vesca subsp. vesca]
							augustus_masked-Fvb1-4-processed-gene-168.1	16805241	16814026	+	Replication, recombination and repair	Molecular Function: hydrolase activity (GO:0016787);	K10706	RNA processing and modification	AAA domain	--	Putative tetratricopeptide-like helical domain, P-loop containing nucleoside triphosphate hydrolase OS=Rosa chinensis OX=74649 GN=RchiOBHm_Chr4g0446031 PE=4 SV=1	RNA processing and modification	LOW QUALITY PROTEIN: uncharacterized protein LOC112191784 [Rosa chinensis]
							augustus_masked-Fvb1-4-processed-gene-168.2	16834856	16835248	+	--	Molecular Function: RNA binding (GO:0003723);	--	--	--	--	KH_8 domain-containing protein OS=Rosa chinensis OX=74649 GN=RchiOBHm_Chr1g0384141 PE=4 SV=1	--	uncharacterized protein LOC101298161 [Fragaria vesca subsp. vesca]
							augustus_masked-Fvb1-4-processed-gene-168.8	16875549	16877482	-	Intracellular trafficking, secretion, and vesicular transport	--	--	--	WD40-like Beta Propeller Repeat	--	Putative transcription factor WD40-like family OS=Rosa chinensis OX=74649 GN=RchiOBHm_Chr3g0486551 PE=4 SV=1	Intracellular trafficking, secretion, and vesicular transport	uncharacterized protein LOC105352244 [Fragaria vesca subsp. vesca]
							maker-Fvb1-4-augustus-gene-168.26	16873774	16877777	+	--	Cellular Component: cytoplasm (GO:0005737);; Biological Process: autophagy (GO:0006914);	K08341	Cytoskeleton	Autophagy protein Atg8 ubiquitin like	Autophagy-related protein 8i OS=Arabidopsis thaliana OX=3702 GN=ATG8I PE=1 SV=1	Autophagy-related protein OS=Rosa chinensis OX=74649 GN=RchiOBHm_Chr3g0486541 PE=3 SV=1	Cytoskeleton	autophagy-related protein 8i-like [Fragaria vesca subsp. vesca]
							maker-Fvb1-4-augustus-gene-168.27	16788703	16790368	-	Signal transduction mechanisms	Molecular Function: protein kinase activity (GO:0004672);; Molecular Function: ATP binding (GO:0005524);	K16224	--	Protein kinase domain	LRR receptor-like serine/threonine-protein kinase IOS1 OS=Arabidopsis thaliana OX=3702 GN=IOS1 PE=1 SV=1	Putative leucine-rich repeat receptor-like protein kinase OS=Prunus yedoensis var. nudiflora OX=2094558 GN=Pyn_29630 PE=4 SV=1	Signal transduction mechanisms	LOW QUALITY PROTEIN: probable LRR receptor-like serine/threonine-protein kinase At1g05700 [Fragaria vesca subsp. vesca]
							maker-Fvb1-4-augustus-gene-168.28	16814797	16818374	-	--	Cellular Component: peroxisome (GO:0005777);; Biological Process: regulation of gene expression (GO:0010468);	K17573	--	NYN domain	--	Putative meiosis arrest female protein OS=Rosa chinensis OX=74649 GN=RchiOBHm_Chr3g0486181 PE=4 SV=1	Function unknown	uncharacterized protein LOC112191977 [Rosa chinensis]
							maker-Fvb1-4-augustus-gene-168.29	16835838	16839123	-	Cell wall/membrane/envelope biogenesis	Molecular Function: protein serine/threonine kinase activity (GO:0004674);; Molecular Function: ATP binding (GO:0005524);	K13436	Signal transduction mechanisms	Protein tyrosine and serine/threonine kinase	Pto-interacting protein 1 OS=Solanum lycopersicum OX=4081 GN=PTI1 PE=1 SV=2	Protein kinase domain-containing protein OS=Rosa chinensis OX=74649 GN=RchiOBHm_Chr3g0486191 PE=3 SV=1	Signal transduction mechanisms	pto-interacting protein 1 [Fragaria vesca subsp. vesca]
							maker-Fvb1-4-augustus-gene-168.31	16863967	16873637	-	--	Molecular Function: protein binding (GO:0005515);; Cellular Component: cellular_component (GO:0005575);; Cellular Component: intracellular (GO:0005622);; Cellular Component: obsolete cell (GO:0005623);; Cellular Component: cytoplasm (GO:0005737);; Cellular Component: cytosol (GO:0005829);; Cellular Component: plasma membrane (GO:0005886);; Biological Process: cell cycle (GO:0007049);; Biological …	--	General function prediction only	WD domain, G-beta repeat	--	Putative transcription factor WD40-like family OS=Rosa chinensis OX=74649 GN=RchiOBHm_Chr3g0486381 PE=4 SV=1	Function unknown	uncharacterized protein LOC101298466 [Fragaria vesca subsp. vesca]
							maker-Fvb1-4-augustus-gene-168.33	16878049	16884372	-	--	Molecular Function: tRNA 2'-O-methyltransferase activity (GO:0106050);	K15446	Function unknown	Methyltransferase TRM13	tRNA:m(4)X modification enzyme TRM13 OS=Oryza sativa subsp. japonica OX=39947 GN=TRM13 PE=1 SV=1	tRNA:m(4)X modification enzyme OS=Rosa chinensis OX=74649 GN=RchiOBHm_Chr3g0486571 PE=3 SV=1	Function unknown	tRNA:m(4)X modification enzyme TRM13 homolog [Fragaria vesca subsp. vesca]
							maker-Fvb1-4-augustus-gene-169.14	16945105	16946714	+
							maker-Fvb1-4-augustus-gene-169.17	16904272	16907435	-	--	Molecular Function: oxidoreductase activity (GO:0016491);	K19825	General function prediction only	N-terminal domain of oxidoreductase	2-alkenal reductase (NADP(+)-dependent) OS=Nicotiana tabacum OX=4097 GN=DBR PE=1 SV=1	Putative oxidoreductase OS=Rosa chinensis OX=74649 GN=RchiOBHm_Chr2g0084731 PE=4 SV=1	Function unknown	2-alkenal reductase (NADP(+)-dependent)-like [Fragaria vesca subsp. vesca]
							maker-Fvb1-4-augustus-gene-169.18	16908714	16911902	-	--	Cellular Component: integral component of membrane (GO:0016021);	--	--	--	--	Uncharacterized protein OS=Rosa chinensis OX=74649 GN=RchiOBHm_Chr3g0486611 PE=4 SV=1	--	uncharacterized protein LOC101294794 [Fragaria vesca subsp. vesca]
							maker-Fvb1-4-augustus-gene-170.13	16995695	16998874	+	--	Biological Process: protein polyubiquitination (GO:0000209);; Molecular Function: molecular_function (GO:0003674);; Molecular Function: catalytic activity (GO:0003824);; Molecular Function: ubiquitin-protein transferase activity (GO:0004842);; Molecular Function: binding (GO:0005488);; Biological Process: cellular protein modification process (GO:0006464);; Biological Process: proteolysis (GO:000…	K20890	General function prediction only	Domain of unknown function	--	ANK_REP_REGION domain-containing protein OS=Prunus persica OX=3760 GN=PRUPE_3G237500 PE=4 SV=1	Replication, recombination and repair	uncharacterized protein LOC101314411 [Fragaria vesca subsp. vesca]
							maker-Fvb1-4-augustus-gene-170.14	17014458	17017893	+	--	Molecular Function: nucleotide binding (GO:0000166);; Cellular Component: RecQ family helicase-topoisomerase III complex (GO:0031422);	K10990	--	RecQ mediated genome instability protein	RecQ-mediated genome instability protein 1 OS=Arabidopsis thaliana OX=3702 GN=RMI1 PE=1 SV=1	RecQ-mediated genome instability protein 1 OS=Rosa chinensis OX=74649 GN=RchiOBHm_Chr7g0189541 PE=3 SV=1	Function unknown	recQ-mediated genome instability protein 1 [Fragaria vesca subsp. vesca]
							maker-Fvb1-4-augustus-gene-170.18	17008590	17011819	-	--	Biological Process: regulation of nitrogen utilization (GO:0006808);; Molecular Function: enzyme regulator activity (GO:0030234);	--	--	Nitrogen regulatory protein P-II	Nitrogen regulatory protein P-II homolog OS=Arabidopsis thaliana OX=3702 GN=GLB1 PE=1 SV=1	Putative nitrogen regulatory protein PII OS=Rosa chinensis OX=74649 GN=RchiOBHm_Chr3g0486731 PE=3 SV=1	Transcription	nitrogen regulatory protein P-II homolog isoform X1 [Fragaria vesca subsp. vesca]
							maker-Fvb1-4-snap-gene-168.40	16853173	16853420	+	--	--	K19891	--	X8 domain	Major pollen allergen Ole e 10 OS=Olea europaea OX=4146 PE=1 SV=1	X8 domain-containing protein OS=Citrus sinensis OX=2711 GN=CISIN_1g032550mg PE=4 SV=1	Function unknown	unnamed protein product [Prunus armeniaca]
							maker-Fvb1-4-snap-gene-168.46	16841528	16844519	-	--	Molecular Function: ligand-gated ion channel activity (GO:0015276);; Cellular Component: integral component of membrane (GO:0016021);	K05387	--	--	Glutamate receptor 1.4 OS=Arabidopsis thaliana OX=3702 GN=GLR1.4 PE=2 SV=2	Glutamate receptor OS=Rosa chinensis OX=74649 GN=RchiOBHm_Chr1g0342001 PE=3 SV=1	--	glutamate receptor 1.4-like [Fragaria vesca subsp. vesca]
							maker-Fvb1-4-snap-gene-168.47	16845352	16848186	-	--	Molecular Function: protein binding (GO:0005515);	K04079	--	F-box-like	Thioredoxin-like fold domain-containing protein MRL7L, chloroplastic OS=Arabidopsis thaliana OX=3702 GN=MRL7L PE=1 SV=1	Putative F-box domain-containing protein OS=Rosa chinensis OX=74649 GN=RchiOBHm_Chr3g0482251 PE=4 SV=1	--	F-box/kelch-repeat protein At3g23880-like [Fragaria vesca subsp. vesca]
							maker-Fvb1-4-snap-gene-168.48	16853771	16856194	-	Coenzyme transport and metabolism	Molecular Function: methionine adenosyltransferase activity (GO:0004478);; Molecular Function: ATP binding (GO:0005524);; Biological Process: S-adenosylmethionine biosynthetic process (GO:0006556);; Biological Process: one-carbon metabolic process (GO:0006730);; Molecular Function: metal ion binding (GO:0046872);	K00789	Coenzyme transport and metabolism	S-adenosylmethionine synthetase, C-terminal domain	S-adenosylmethionine synthase 2 OS=Vitis vinifera OX=29760 GN=METK2 PE=3 SV=1	S-adenosylmethionine synthase OS=Fragaria ananassa OX=3747 GN=SAMase PE=2 SV=1	Coenzyme transport and metabolism	S-adenosylmethionine synthase 5 [Fragaria vesca subsp. vesca]
							maker-Fvb1-4-snap-gene-169.22	16935316	16936432	+
							maker-Fvb1-4-snap-gene-169.24	16949986	16951412	+	Cell wall/membrane/envelope biogenesis	Biological Process: galactose metabolic process (GO:0006012);; Molecular Function: inositol 3-alpha-galactosyltransferase activity (GO:0047216);	K18819	Carbohydrate transport and metabolism	Glycosyl transferase family 8	Galactinol synthase 2 OS=Solanum lycopersicum OX=4081 GN=GOLS2 PE=2 SV=1	Hexosyltransferase OS=Rosa chinensis OX=74649 GN=RchiOBHm_Chr3g0486641 PE=3 SV=1	Carbohydrate transport and metabolism	galactinol synthase 2-like [Fragaria vesca subsp. vesca]
							maker-Fvb1-4-snap-gene-169.26	16900751	16903730	-	--	Cellular Component: integral component of membrane (GO:0016021);	--	--	--	--	Uncharacterized protein OS=Rosa chinensis OX=74649 GN=RchiOBHm_Chr3g0486601 PE=4 SV=1	--	uncharacterized protein LOC101295079 [Fragaria vesca subsp. vesca]
							maker-Fvb1-4-snap-gene-169.28	16918754	16920897	-	--	Molecular Function: oxidoreductase activity (GO:0016491);	K09841	General function prediction only	Enoyl-(Acyl carrier protein) reductase	Short-chain dehydrogenase reductase 3b OS=Arabidopsis thaliana OX=3702 GN=SDR3b PE=2 SV=1	Putative oxidoreductase OS=Rosa chinensis OX=74649 GN=RchiOBHm_Chr3g0486621 PE=4 SV=1	Secondary metabolites biosynthesis, transport and catabolism	short-chain dehydrogenase reductase 3b-like [Fragaria vesca subsp. vesca]
							maker-Fvb1-4-snap-gene-170.21	17011549	17014107	+	--	--	--	--	Protein of unknown function (DUF952)	--	Uncharacterized protein OS=Rosa chinensis OX=74649 GN=RchiOBHm_Chr3g0486741 PE=4 SV=1	Function unknown	uncharacterized protein LOC101300390 [Fragaria vesca subsp. vesca]
							maker-Fvb1-4-snap-gene-170.23	16985893	16989371	-
							snap_masked-Fvb1-4-processed-gene-170.10	17005729	17007907	-	--	Cellular Component: nuclear chromosome (GO:0000228);; Biological Process: mitotic cell cycle (GO:0000278);; Cellular Component: condensed chromosome (GO:0000793);; Cellular Component: condensed nuclear chromosome (GO:0000794);; Cellular Component: nuclear cohesin complex (GO:0000798);; Biological Process: sister chromatid segregation (GO:0000819);; Molecular Function: molecular_function (GO:00036…	K06670	--	--	--	Putative rad21/Rec8-like protein OS=Rosa chinensis OX=74649 GN=RchiOBHm_Chr2g0174821 PE=3 SV=1	Cell cycle control, cell division, chromosome partitioning	sister chromatid cohesion 1 protein 2 [Fragaria vesca subsp. vesca]
							snap_masked-Fvb1-4-processed-gene-170.9	17003025	17005382	-	--	Molecular Function: GTP binding (GO:0005525);; Cellular Component: cytoplasm (GO:0005737);; Biological Process: intracellular protein transport (GO:0006886);; Biological Process: vesicle-mediated transport (GO:0016192);	K07937	Intracellular trafficking, secretion, and vesicular transport	ADP-ribosylation factor family	ADP-ribosylation factor 2 OS=Oryza sativa subsp. japonica OX=39947 GN=ARF PE=2 SV=2	Uncharacterized protein OS=Prunus persica OX=3760 GN=PRUPE_3G005200 PE=3 SV=1	Intracellular trafficking, secretion, and vesicular transport	ADP-ribosylation factor isoform X2 [Malus domestica]
Fvb1-4	17200001	17490000	289999	39	0.411069	2.37858
							augustus_masked-Fvb1-4-processed-gene-172.14	17254677	17254877	-
							augustus_masked-Fvb1-4-processed-gene-172.15	17270095	17273589	-	Posttranslational modification, protein turnover, chaperones	Molecular Function: iron ion binding (GO:0005506);; Biological Process: iron-sulfur cluster assembly (GO:0016226);; Molecular Function: iron-sulfur cluster binding (GO:0051536);	K22074	Posttranslational modification, protein turnover, chaperones	NifU-like domain	NifU-like protein 1, chloroplastic OS=Arabidopsis thaliana OX=3702 GN=NIFU1 PE=1 SV=1	Putative NIF system FeS cluster assembly, NifU OS=Rosa chinensis OX=74649 GN=RchiOBHm_Chr3g0487011 PE=3 SV=1	Posttranslational modification, protein turnover, chaperones	nifU-like protein 1, chloroplastic [Fragaria vesca subsp. vesca]
							augustus_masked-Fvb1-4-processed-gene-172.4	17209924	17221251	+	--	Molecular Function: cysteine-type peptidase activity (GO:0008234);	--	--	--	--	Putative Ulp1 protease family catalytic domain-containing protein OS=Rosa chinensis OX=74649 GN=RchiOBHm_Chr2g0147501 PE=3 SV=1	--	uncharacterized protein LOC112163933 [Rosa chinensis]
							augustus_masked-Fvb1-4-processed-gene-173.0	17288752	17294519	+	Lipid transport and metabolism	Molecular Function: acyl-CoA ligase activity (GO:0003996);; Molecular Function: long-chain fatty acid-CoA ligase activity (GO:0004467);; Molecular Function: decanoate-CoA ligase activity (GO:0102391);	K01897	Lipid transport and metabolism	AMP-binding enzyme	Long chain acyl-CoA synthetase 1 OS=Arabidopsis thaliana OX=3702 GN=LACS1 PE=2 SV=1	Putative long-chain-fatty-acid--CoA ligase OS=Rosa chinensis OX=74649 GN=RchiOBHm_Chr3g0487031 PE=4 SV=1	Lipid transport and metabolism	long chain acyl-CoA synthetase 1-like [Fragaria vesca subsp. vesca]
							augustus_masked-Fvb1-4-processed-gene-173.1	17300139	17300694	+	--	Molecular Function: polygalacturonase activity (GO:0004650);; Cellular Component: extracellular region (GO:0005576);; Biological Process: carbohydrate metabolic process (GO:0005975);; Biological Process: cell wall organization (GO:0071555);	K01213	--	Glycosyl hydrolases family 28	Polygalacturonase OS=Nicotiana tabacum OX=4097 GN=PG1 PE=2 SV=1	Putative polygalacturonase OS=Rosa chinensis OX=74649 GN=RchiOBHm_Chr1g0323871 PE=3 SV=1	Carbohydrate transport and metabolism	polygalacturonase-like [Fragaria vesca subsp. vesca]
							augustus_masked-Fvb1-4-processed-gene-173.2	17338356	17339950	+	--	Molecular Function: aspartic-type endopeptidase activity (GO:0004190);	K22683	Posttranslational modification, protein turnover, chaperones	Xylanase inhibitor N-terminal	Aspartic proteinase nepenthesin-1 OS=Nepenthes gracilis OX=150966 GN=nep1 PE=1 SV=1	Putative nepenthesin OS=Rosa chinensis OX=74649 GN=RchiOBHm_Chr3g0487141 PE=3 SV=1	Posttranslational modification, protein turnover, chaperones	aspartic proteinase nepenthesin-1 [Fragaria vesca subsp. vesca]
							augustus_masked-Fvb1-4-processed-gene-173.5	17374320	17378038	+	Posttranslational modification, protein turnover, chaperones	Molecular Function: copper ion binding (GO:0005507);; Cellular Component: mitochondrial inner membrane (GO:0005743);; Biological Process: copper ion transport (GO:0006825);; Biological Process: cellular copper ion homeostasis (GO:0006878);; Biological Process: respiratory chain complex IV assembly (GO:0008535);; Cellular Component: integral component of membrane (GO:0016021);	K07152	Energy production and conversion	SCO1/SenC	Protein SCO1 homolog 1, mitochondrial OS=Arabidopsis thaliana OX=3702 GN=HCC1 PE=1 SV=1	Putative copper chaperone SCO1/SenC, thioredoxin-like protein OS=Rosa chinensis OX=74649 GN=RchiOBHm_Chr7g0216861 PE=3 SV=1	Energy production and conversion	protein SCO1 homolog 1, mitochondrial-like [Fragaria vesca subsp. vesca]
							augustus_masked-Fvb1-4-processed-gene-174.7	17405945	17406388	-	--	Molecular Function: protein dimerization activity (GO:0046983);	--	--	--	Transcription factor UPBEAT1 OS=Arabidopsis thaliana OX=3702 GN=UPB1 PE=2 SV=1	Putative myc-type, basic helix-loop-helix (BHLH) domain-containing protein OS=Rosa chinensis OX=74649 GN=RchiOBHm_Chr3g0487231 PE=4 SV=1	Function unknown	transcription factor UPBEAT1 [Fragaria vesca subsp. vesca]
							maker-Fvb1-4-augustus-gene-172.32	17263805	17269032	+	--	Molecular Function: DNA binding (GO:0003677);; Biological Process: DNA repair (GO:0006281);; Biological Process: chromatin remodeling (GO:0006338);; Cellular Component: NuA4 histone acetyltransferase complex (GO:0035267);; Biological Process: histone H4 acetylation (GO:0043967);; Biological Process: histone H2A acetylation (GO:0043968);; Biological Process: negative regulation of transcription, D…	K11324	--	SANT/Myb-like domain of DAMP1	SWR1-complex protein 4 OS=Arabidopsis thaliana OX=3702 GN=SWC4 PE=1 SV=1	Putative transcription factor MYB-HB-like family OS=Rosa chinensis OX=74649 GN=RchiOBHm_Chr3g0486991 PE=4 SV=1	Transcription	SWR1-complex protein 4 [Fragaria vesca subsp. vesca]
							maker-Fvb1-4-augustus-gene-172.33	17270048	17272143	+	--	Cellular Component: integral component of membrane (GO:0016021);	K11324	--	--	--	Putative insulin-induced protein family OS=Rosa chinensis OX=74649 GN=RchiOBHm_Chr3g0487001 PE=4 SV=1	--	uncharacterized protein LOC101293640 [Fragaria vesca subsp. vesca]
							maker-Fvb1-4-augustus-gene-172.36	17233962	17237694	-	Secondary metabolites biosynthesis, transport and catabolism	Molecular Function: metal ion binding (GO:0046872);; Molecular Function: C-19 gibberellin 2-beta-dioxygenase activity (GO:0052634);	K04125	--	2OG-Fe(II) oxygenase superfamily	Gibberellin 2-beta-dioxygenase 2 OS=Pisum sativum OX=3888 GN=GA2OX2 PE=2 SV=1	Putative gibberellin 2-beta-dioxygenase OS=Rosa chinensis OX=74649 GN=RchiOBHm_Chr3g0486971 PE=3 SV=1	Secondary metabolites biosynthesis, transport and catabolism	gibberellin 2-beta-dioxygenase 2 [Fragaria vesca subsp. vesca]
							maker-Fvb1-4-augustus-gene-173.29	17379239	17385376	+	--	Molecular Function: RNA binding (GO:0003723);	K13207	RNA processing and modification	RNA recognition motif. (a.k.a. RRM, RBD, or RNP domain)	Flowering time control protein FCA OS=Oryza sativa subsp. indica OX=39946 GN=FCA PE=3 SV=2	Putative flowering time control protein FCA OS=Rosa chinensis OX=74649 GN=RchiOBHm_Chr3g0487191 PE=4 SV=1	RNA processing and modification	flowering time control protein FCA [Fragaria vesca subsp. vesca]
							maker-Fvb1-4-augustus-gene-173.31	17295541	17299314	-	--	--	--	--	--	--	--	--	uncharacterized protein LOC105351934 [Fragaria vesca subsp. vesca]
							maker-Fvb1-4-augustus-gene-173.33	17308231	17312581	-	Translation, ribosomal structure and biogenesis	Molecular Function: nucleic acid binding (GO:0003676);; Molecular Function: RNA helicase activity (GO:0003724);; Molecular Function: ATP binding (GO:0005524);	K12820	RNA processing and modification	Helicase associated domain (HA2)	Probable pre-mRNA-splicing factor ATP-dependent RNA helicase DEAH2 OS=Arabidopsis thaliana OX=3702 GN=At3g62310 PE=2 SV=1	RNA helicase OS=Rosa chinensis OX=74649 GN=RchiOBHm_Chr3g0487101 PE=4 SV=1	RNA processing and modification	probable pre-mRNA-splicing factor ATP-dependent RNA helicase [Fragaria vesca subsp. vesca]
							maker-Fvb1-4-augustus-gene-173.34	17326175	17328127	-	--	Molecular Function: glycerol-3-phosphate O-acyltransferase activity (GO:0004366);; Molecular Function: sn-1-glycerol-3-phosphate C16:0-DCA-CoA acyl transferase activity (GO:0102420);	K13508	--	Acyltransferase	Probable glycerol-3-phosphate acyltransferase 2 OS=Arabidopsis thaliana OX=3702 GN=GPAT2 PE=2 SV=1	Putative glycerol-3-phosphate 1-O-acyltransferase OS=Rosa chinensis OX=74649 GN=RchiOBHm_Chr3g0487121 PE=4 SV=1	Lipid transport and metabolism	probable glycerol-3-phosphate acyltransferase 2 [Fragaria vesca subsp. vesca]
							maker-Fvb1-4-augustus-gene-173.35	17340108	17343016	-	--	Cellular Component: integral component of membrane (GO:0016021);	--	--	--	--	Uncharacterized protein OS=Rosa chinensis OX=74649 GN=RchiOBHm_Chr3g0487151 PE=4 SV=1	--	uncharacterized protein LOC101292166 [Fragaria vesca subsp. vesca]
							maker-Fvb1-4-augustus-gene-173.36	17354245	17357998	-	--	Molecular Function: nucleic acid binding (GO:0003676);; Molecular Function: zinc ion binding (GO:0008270);	--	--	--	--	Putative transcription factor interactor and regulator CCHC(Zn) family OS=Rosa chinensis OX=74649 GN=RchiOBHm_Chr3g0487181 PE=4 SV=1	Function unknown	uncharacterized protein LOC101308219 [Fragaria vesca subsp. vesca]
							maker-Fvb1-4-augustus-gene-173.37	17386081	17387829	-	--	Molecular Function: DNA-binding transcription factor activity (GO:0003700);; Cellular Component: nucleus (GO:0005634);; Molecular Function: sequence-specific DNA binding (GO:0043565);	K12835	--	WRKY DNA -binding domain	WRKY transcription factor 23 OS=Arabidopsis thaliana OX=3702 GN=WRKY23 PE=2 SV=1	WRKY transcription factor OS=Rosa chinensis OX=74649 GN=RchiOBHm_Chr3g0487201 PE=3 SV=1	Transcription	probable WRKY transcription factor 23 [Fragaria vesca subsp. vesca]
							maker-Fvb1-4-augustus-gene-174.29	17425224	17426917	+	--	Biological Process: signal transduction (GO:0007165);; Molecular Function: hydrolase activity (GO:0016787);; Molecular Function: ADP binding (GO:0043531);	K00695	--	TIR domain	Disease resistance protein Roq1 OS=Nicotiana benthamiana OX=4100 GN=ROQ1 PE=1 SV=1	ADP-ribosyl cyclase/cyclic ADP-ribose hydrolase OS=Rosa chinensis OX=74649 GN=RchiOBHm_Chr3g0487331 PE=4 SV=1	Function unknown	TMV resistance protein N-like [Fragaria vesca subsp. vesca]
							maker-Fvb1-4-augustus-gene-174.31	17444024	17448702	+	--	Molecular Function: molecular_function (GO:0003674);; Molecular Function: nucleic acid binding (GO:0003676);; Molecular Function: DNA binding (GO:0003677);; Molecular Function: RNA binding (GO:0003723);; Molecular Function: catalytic activity (GO:0003824);; Molecular Function: nuclease activity (GO:0004518);; Molecular Function: endonuclease activity (GO:0004519);; Molecular Function: binding (GO…	--	General function prediction only	PPR repeat family	Pentatricopeptide repeat-containing protein At2g31400, chloroplastic OS=Arabidopsis thaliana OX=3702 GN=At2g31400 PE=2 SV=1	Putative Smr domain, tetratricopeptide-like helical domain-containing protein OS=Rosa chinensis OX=74649 GN=RchiOBHm_Chr3g0487361 PE=3 SV=1	Function unknown	pentatricopeptide repeat-containing protein At2g31400, chloroplastic [Fragaria vesca subsp. vesca]
							maker-Fvb1-4-augustus-gene-174.32	17468297	17474327	+	--	Cellular Component: ribonuclease MRP complex (GO:0000172);; Biological Process: tRNA 5'-leader removal (GO:0001682);; Molecular Function: ribonuclease P activity (GO:0004526);; Cellular Component: nucleolar ribonuclease P complex (GO:0005655);	K01164	RNA processing and modification	POPLD (NUC188) domain	--	Putative ribonuclease P OS=Rosa chinensis OX=74649 GN=RchiOBHm_Chr3g0487391 PE=4 SV=1	RNA processing and modification	ribonucleases P/MRP protein subunit POP1 [Fragaria vesca subsp. vesca]
							maker-Fvb1-4-augustus-gene-174.34	17414009	17416915	-	Carbohydrate transport and metabolism	Molecular Function: galactinol-raffinose galactosyltransferase activity (GO:0047268);	K06611	--	Raffinose synthase or seed imbibition protein Sip1	Stachyose synthase OS=Pisum sativum OX=3888 GN=STS1 PE=1 SV=1	Putative galactinol--raffinose galactosyltransferase OS=Rosa chinensis OX=74649 GN=RchiOBHm_Chr3g0487291 PE=3 SV=1	Function unknown	stachyose synthase [Fragaria vesca subsp. vesca]
							maker-Fvb1-4-augustus-gene-174.35	17419149	17423630	-	Function unknown	Biological Process: mitochondrial respiratory chain complex I assembly (GO:0032981);	K09008	Function unknown	Protein of unknown function (DUF498/DUF598)	--	NADH dehydrogenase [ubiquinone] 1 alpha subcomplex assembly factor 3 OS=Rosa chinensis OX=74649 GN=RchiOBHm_Chr3g0487321 PE=4 SV=1	Function unknown	NADH dehydrogenase [ubiquinone] 1 alpha subcomplex assembly factor 3-like [Fragaria vesca subsp. vesca]
							maker-Fvb1-4-augustus-gene-174.38	17475729	17477943	-	--	Molecular Function: molecular_function (GO:0003674);; Molecular Function: nucleic acid binding (GO:0003676);; Molecular Function: RNA binding (GO:0003723);; Molecular Function: catalytic activity (GO:0003824);; Molecular Function: nuclease activity (GO:0004518);; Molecular Function: endonuclease activity (GO:0004519);; Molecular Function: binding (GO:0005488);; Cellular Component: cellular_compon…	--	General function prediction only	PPR repeat	Pentatricopeptide repeat-containing protein At1g02370, mitochondrial OS=Arabidopsis thaliana OX=3702 GN=At1g02370 PE=2 SV=1	Pentatricopeptide repeat-containing protein OS=Prunus yedoensis var. nudiflora OX=2094558 GN=Pyn_38333 PE=4 SV=1	Function unknown	pentatricopeptide repeat-containing protein At1g02370, mitochondrial [Fragaria vesca subsp. vesca]
							maker-Fvb1-4-augustus-gene-174.39	17481080	17484978	-	Replication, recombination and repair	Molecular Function: nucleic acid binding (GO:0003676);; Molecular Function: RNA helicase activity (GO:0003724);; Molecular Function: ATP binding (GO:0005524);	K12835	RNA processing and modification	DEAD/DEAH box helicase	DEAD-box ATP-dependent RNA helicase 24 OS=Arabidopsis thaliana OX=3702 GN=RH24 PE=1 SV=2	Putative RNA helicase OS=Rosa chinensis OX=74649 GN=RchiOBHm_Chr3g0487421 PE=3 SV=1	RNA processing and modification	DEAD-box ATP-dependent RNA helicase 24 isoform X1 [Fragaria vesca subsp. vesca]
							maker-Fvb1-4-snap-gene-172.42	17275104	17280941	+	--	--	--	--	Protein of unknown function (DUF724)	DUF724 domain-containing protein 7 OS=Arabidopsis thaliana OX=3702 GN=DUF7 PE=1 SV=1	Putative Agenet-like domain-containing protein OS=Rosa chinensis OX=74649 GN=RchiOBHm_Chr3g0487021 PE=4 SV=1	Function unknown	uncharacterized protein LOC101309389 isoform X1 [Fragaria vesca subsp. vesca]
							maker-Fvb1-4-snap-gene-172.44	17202615	17208277	-	--	Molecular Function: molecular_function (GO:0003674);; Molecular Function: binding (GO:0005488);; Molecular Function: carbohydrate binding (GO:0030246);	--	--	--	--	Uncharacterized protein OS=Rosa chinensis OX=74649 GN=RchiOBHm_Chr3g0486931 PE=4 SV=1	Function unknown	hypothetical protein RchiOBHm_Chr3g0486931 [Rosa chinensis]
							maker-Fvb1-4-snap-gene-173.39	17305365	17306320	+
							maker-Fvb1-4-snap-gene-173.40	17304531	17304963	+
							maker-Fvb1-4-snap-gene-173.41	17346576	17348684	+	--	Molecular Function: polygalacturonase activity (GO:0004650);; Cellular Component: extracellular region (GO:0005576);; Biological Process: carbohydrate metabolic process (GO:0005975);; Biological Process: cell wall organization (GO:0071555);	K01213	--	Glycosyl hydrolases family 28	Exopolygalacturonase (Fragment) OS=Oenothera organensis OX=3945 PE=2 SV=1	Putative polygalacturonase OS=Rosa chinensis OX=74649 GN=RchiOBHm_Chr1g0323871 PE=3 SV=1	Carbohydrate transport and metabolism	exopolygalacturonase-like [Rosa chinensis]
							maker-Fvb1-4-snap-gene-173.49	17320621	17322046	-
							maker-Fvb1-4-snap-gene-173.54	17369647	17370428	-
							maker-Fvb1-4-snap-gene-174.45	17477688	17480945	+	--	Molecular Function: isomerase activity (GO:0016853);	K17911	--	Domain of unknown function (DUF4033)	Beta-carotene isomerase D27, chloroplastic OS=Arabidopsis thaliana OX=3702 GN=D27 PE=1 SV=1	Putative beta-carotene isomerase OS=Rosa chinensis OX=74649 GN=RchiOBHm_Chr3g0487411 PE=4 SV=1	Function unknown	beta-carotene isomerase D27, chloroplastic [Fragaria vesca subsp. vesca]
							maker-Fvb1-4-snap-gene-174.47	17409499	17410208	-	--	Molecular Function: ubiquitin activating enzyme activity (GO:0004839);; Molecular Function: transferase activity, transferring acyl groups (GO:0016746);	K10581	Posttranslational modification, protein turnover, chaperones	Ubiquitin-conjugating enzyme	Probable ubiquitin-conjugating enzyme E2 25 OS=Arabidopsis thaliana OX=3702 GN=UBC25 PE=2 SV=1	Putative aminoacyltransferase, E1 ubiquitin-activating enzyme OS=Rosa chinensis OX=74649 GN=RchiOBHm_Chr3g0487241 PE=4 SV=1	Posttranslational modification, protein turnover, chaperones	probable ubiquitin-conjugating enzyme E2 25 [Rosa chinensis]
							maker-Fvb1-4-snap-gene-174.48	17409025	17409407	-	--	Molecular Function: molecular_function (GO:0003674);; Molecular Function: catalytic activity (GO:0003824);; Cellular Component: cellular_component (GO:0005575);; Cellular Component: extracellular region (GO:0005576);; Cellular Component: cell wall (GO:0005618);; Cellular Component: intracellular (GO:0005622);; Cellular Component: obsolete cell (GO:0005623);; Cellular Component: cytoplasm (GO:0005…	--	--	--	--	DUF4283 domain-containing protein OS=Rosa chinensis OX=74649 GN=RchiOBHm_Chr6g0265791 PE=4 SV=1	Energy production and conversion	uncharacterized protein LOC112203799 [Rosa chinensis]
							maker-Fvb1-4-snap-gene-174.49	17410909	17411533	-	--	--	--	--	--	--	Uncharacterized protein OS=Rosa chinensis OX=74649 GN=RchiOBHm_Chr4g0446291 PE=4 SV=1	--	hypothetical protein RchiOBHm_Chr4g0446291 [Rosa chinensis]
							maker-Fvb1-4-snap-gene-174.52	17427978	17429698	-	--	Molecular Function: structural constituent of ribosome (GO:0003735);; Cellular Component: ribosome (GO:0005840);; Biological Process: translation (GO:0006412);; Molecular Function: metal ion binding (GO:0046872);	K02978	Translation, ribosomal structure and biogenesis	Ribosomal protein S27	40S ribosomal protein S27-2 OS=Arabidopsis thaliana OX=3702 GN=RPS27B PE=2 SV=2	40S ribosomal protein S27 OS=Rosa chinensis OX=74649 GN=RchiOBHm_Chr3g0487351 PE=3 SV=1	Translation, ribosomal structure and biogenesis	40S ribosomal protein S27-2-like [Fragaria vesca subsp. vesca]
							maker-Fvb1-4-snap-gene-174.53	17457761	17469080	-	Function unknown	Molecular Function: carboxypeptidase activity (GO:0004180);; Cellular Component: integral component of membrane (GO:0016021);; Molecular Function: carbohydrate binding (GO:0030246);	--	Posttranslational modification, protein turnover, chaperones	Carboxypeptidase regulatory-like domain	--	Putative glucoamylase, starch-binding, carboxypeptidase-like, regulatory domain-containing protein OS=Rosa chinensis OX=74649 GN=RchiOBHm_Chr3g0487381 PE=4 SV=1	Posttranslational modification, protein turnover, chaperones	nodal modulator 1 [Fragaria vesca subsp. vesca]
							snap_masked-Fvb1-4-processed-gene-173.20	17304600	17304956	-
Fvb1-4	17540001	17640000	99999	18	0.385139	1.96508
							augustus_masked-Fvb1-4-processed-gene-175.7	17564779	17566455	-	--	Molecular Function: catalytic activity (GO:0003824);	K23618	Lipid transport and metabolism	AMP-binding enzyme	Probable acyl-activating enzyme 5, peroxisomal OS=Arabidopsis thaliana OX=3702 GN=AAE5 PE=1 SV=1	Uncharacterized protein OS=Malus baccata OX=106549 GN=C1H46_041523 PE=4 SV=1	Lipid transport and metabolism	probable acyl-activating enzyme 5, peroxisomal [Fragaria vesca subsp. vesca]
							augustus_masked-Fvb1-4-processed-gene-176.0	17591046	17592716	-	--	Molecular Function: 4-coumarate-CoA ligase activity (GO:0016207);	K23618	Lipid transport and metabolism	AMP-binding enzyme	Probable acyl-activating enzyme 6 OS=Arabidopsis thaliana OX=3702 GN=AAE6 PE=2 SV=1	Putative 4-coumarate--CoA ligase OS=Rosa chinensis OX=74649 GN=RchiOBHm_Chr3g0487461 PE=4 SV=1	Lipid transport and metabolism	probable acyl-activating enzyme 6 [Fragaria vesca subsp. vesca]
							augustus_masked-Fvb1-4-processed-gene-176.1	17602513	17602890	+	--	Cellular Component: cytochrome b6f complex (GO:0009512);	--	--	PetM family of cytochrome b6f complex subunit 7	Cytochrome b6-f complex subunit 7 (Fragment) OS=Spinacia oleracea OX=3562 GN=petM PE=1 SV=1	Putative PetM of cytochrome b6/f complex subunit 7 OS=Rosa chinensis OX=74649 GN=RchiOBHm_Chr3g0487591 PE=3 SV=1	Function unknown	uncharacterized protein LOC101314888 [Fragaria vesca subsp. vesca]
							augustus_masked-Fvb1-4-processed-gene-176.7	17601007	17602161	-	--	Molecular Function: 4-coumarate-CoA ligase activity (GO:0016207);	K01913	Lipid transport and metabolism	AMP-binding enzyme	Probable acyl-activating enzyme 5, peroxisomal OS=Arabidopsis thaliana OX=3702 GN=AAE5 PE=1 SV=1	Putative 4-coumarate--CoA ligase OS=Rosa chinensis OX=74649 GN=RchiOBHm_Chr3g0487741 PE=4 SV=1	Lipid transport and metabolism	probable acyl-activating enzyme 5, peroxisomal [Fragaria vesca subsp. vesca]
							maker-Fvb1-4-augustus-gene-175.23	17540900	17546794	+	Translation, ribosomal structure and biogenesis	Molecular Function: nucleic acid binding (GO:0003676);; Molecular Function: RNA helicase activity (GO:0003724);; Molecular Function: ATP binding (GO:0005524);	K12820	RNA processing and modification	Helicase associated domain (HA2)	Probable pre-mRNA-splicing factor ATP-dependent RNA helicase DEAH3 OS=Arabidopsis thaliana OX=3702 GN=At2g47250 PE=2 SV=1	RNA helicase OS=Rosa chinensis OX=74649 GN=RchiOBHm_Chr3g0487101 PE=4 SV=1	RNA processing and modification	probable pre-mRNA-splicing factor ATP-dependent RNA helicase [Fragaria vesca subsp. vesca]
							maker-Fvb1-4-augustus-gene-175.25	17550444	17559278	-	Lipid transport and metabolism	Molecular Function: acyl-CoA ligase activity (GO:0003996);; Molecular Function: long-chain fatty acid-CoA ligase activity (GO:0004467);; Molecular Function: decanoate-CoA ligase activity (GO:0102391);	K01897	Lipid transport and metabolism	AMP-binding enzyme	Long chain acyl-CoA synthetase 1 OS=Arabidopsis thaliana OX=3702 GN=LACS1 PE=2 SV=1	Putative long-chain-fatty-acid--CoA ligase OS=Rosa chinensis OX=74649 GN=RchiOBHm_Chr3g0487091 PE=4 SV=1	Lipid transport and metabolism	long chain acyl-CoA synthetase 1-like [Fragaria vesca subsp. vesca]
							maker-Fvb1-4-augustus-gene-176.33	17605497	17612389	+	--	Molecular Function: protein kinase activity (GO:0004672);; Molecular Function: ATP binding (GO:0005524);; Cellular Component: integral component of membrane (GO:0016021);	K13430	Signal transduction mechanisms	Protein tyrosine and serine/threonine kinase	Receptor-like serine/threonine-protein kinase ALE2 OS=Arabidopsis thaliana OX=3702 GN=ALE2 PE=1 SV=1	Protein kinase domain-containing protein OS=Rosa chinensis OX=74649 GN=RchiOBHm_Chr3g0487601 PE=4 SV=1	Signal transduction mechanisms	receptor-like serine/threonine-protein kinase ALE2 [Fragaria vesca subsp. vesca]
							maker-Fvb1-4-augustus-gene-176.34	17616504	17619275	+	--	Molecular Function: protein kinase activity (GO:0004672);; Molecular Function: ATP binding (GO:0005524);; Cellular Component: integral component of membrane (GO:0016021);	K13430	Signal transduction mechanisms	Protein tyrosine and serine/threonine kinase	Receptor-like serine/threonine-protein kinase ALE2 OS=Arabidopsis thaliana OX=3702 GN=ALE2 PE=1 SV=1	Protein kinase domain-containing protein OS=Rosa chinensis OX=74649 GN=RchiOBHm_Chr3g0487601 PE=4 SV=1	Signal transduction mechanisms	receptor-like serine/threonine-protein kinase ALE2 [Fragaria vesca subsp. vesca]
							maker-Fvb1-4-augustus-gene-176.37	17611062	17615460	-	--	--	--	--	--	--	Uncharacterized protein OS=Rosa chinensis OX=74649 GN=RchiOBHm_Chr3g0487611 PE=4 SV=1	--	uncharacterized protein LOC101297681 isoform X1 [Fragaria vesca subsp. vesca]
							maker-Fvb1-4-augustus-gene-176.38	17619836	17621608	-	--	Cellular Component: integral component of membrane (GO:0016021);	--	--	--	--	Uncharacterized protein OS=Rosa chinensis OX=74649 GN=RchiOBHm_Chr3g0487701 PE=4 SV=1	--	uncharacterized protein LOC101290989 [Fragaria vesca subsp. vesca]
							maker-Fvb1-4-augustus-gene-176.39	17623114	17628103	-	--	--	K03283	--	Lecithin retinol acyltransferase	Protein LEAD-SENSITIVE 1 OS=Arabidopsis thaliana OX=3702 GN=PSE1 PE=2 SV=1	Putative endopeptidase, NLPC/P60 domain, LRAT-like domain-containing protein OS=Rosa chinensis OX=74649 GN=RchiOBHm_Chr3g0487651 PE=4 SV=1	Function unknown	uncharacterized protein LOC101291280 [Fragaria vesca subsp. vesca]
							maker-Fvb1-4-snap-gene-175.38	17564608	17573700	+	--	Biological Process: tRNA wobble uridine modification (GO:0002098);; Cellular Component: cytosol (GO:0005829);; Biological Process: protein urmylation (GO:0032447);; Biological Process: tRNA thio-modification (GO:0034227);	K12161	Posttranslational modification, protein turnover, chaperones	Urm1 (Ubiquitin related modifier)	Ubiquitin-related modifier 1 homolog 2 OS=Arabidopsis thaliana OX=3702 GN=URM1-2 PE=3 SV=1	Ubiquitin-related modifier 1 homolog OS=Rosa chinensis OX=74649 GN=RchiOBHm_Chr3g0487581 PE=3 SV=1	Posttranslational modification, protein turnover, chaperones	ubiquitin-related modifier 1 homolog 2-like [Rosa chinensis]
							maker-Fvb1-4-snap-gene-175.39	17540900	17541558	-
							maker-Fvb1-4-snap-gene-175.40	17547707	17549481	-
							maker-Fvb1-4-snap-gene-175.43	17560439	17562455	-	Carbohydrate transport and metabolism	Molecular Function: polygalacturonase activity (GO:0004650);; Cellular Component: extracellular region (GO:0005576);; Biological Process: carbohydrate metabolic process (GO:0005975);; Biological Process: cell wall organization (GO:0071555);	K01213	--	Glycosyl hydrolases family 28	Exopolygalacturonase (Fragment) OS=Oenothera organensis OX=3945 PE=2 SV=1	Putative polygalacturonase OS=Rosa chinensis OX=74649 GN=RchiOBHm_Chr1g0323871 PE=3 SV=1	Carbohydrate transport and metabolism	putative polygalacturonase [Rosa chinensis]
							maker-Fvb1-4-snap-gene-176.47	17601688	17602344	+	--	--	--	--	--	--	Uncharacterized protein OS=Arundo donax OX=35708 PE=4 SV=1	--	hypothetical protein EE612_049416, partial [Oryza sativa]
							maker-Fvb1-4-snap-gene-176.58	17633934	17649546	-	--	Molecular Function: cysteine-type peptidase activity (GO:0008234);	--	--	--	--	Putative actinidain OS=Rosa chinensis OX=74649 GN=RchiOBHm_Chr6g0301921 PE=3 SV=1	--	--
							snap_masked-Fvb1-4-processed-gene-176.16	17592217	17592722	+	--	--	--	--	--	--	Uncharacterized protein OS=Arundo donax OX=35708 PE=4 SV=1	--	hypothetical protein F2P56_000155 [Juglans regia]
Fvb1-4	18310001	18460000	149999	15	0.503887	2.47055
							augustus_masked-Fvb1-4-processed-gene-183.5	18334597	18334851	-	Amino acid transport and metabolism	Biological Process: cellular amino acid metabolic process (GO:0006520);; Molecular Function: pyridoxal phosphate binding (GO:0030170);	K01733	--	--	Threonine synthase 1, chloroplastic OS=Arabidopsis thaliana OX=3702 GN=TS1 PE=1 SV=1	Threonine synthase OS=Eucalyptus grandis OX=71139 GN=EUGRSUZ_C00846 PE=3 SV=1	Amino acid transport and metabolism	hypothetical protein GOBAR_AA30151 [Gossypium barbadense]
							augustus_masked-Fvb1-4-processed-gene-184.3	18412419	18413180	+	--	Cellular Component: integral component of membrane (GO:0016021);	K20363	Intracellular trafficking, secretion, and vesicular transport	Yip1 domain	--	Protein YIPF OS=Rosa chinensis OX=74649 GN=RchiOBHm_Chr3g0491231 PE=3 SV=1	Intracellular trafficking, secretion, and vesicular transport	protein YIPF5 homolog [Rosa chinensis]
							augustus_masked-Fvb1-4-processed-gene-184.8	18415242	18415916	-	--	--	--	--	--	--	Uncharacterized protein OS=Rosa chinensis OX=74649 GN=RchiOBHm_Chr3g0491241 PE=4 SV=1	--	uncharacterized protein LOC112195238 [Rosa chinensis]
							maker-Fvb1-4-augustus-gene-183.25	18302126	18312856	+	--	Molecular Function: hydrolase activity (GO:0016787);	K08869	General function prediction only	ABC1 family	Putative ABC1 protein At2g40090 OS=Arabidopsis thaliana OX=3702 GN=At2g40090 PE=2 SV=2	Putative cadmium-transporting ATPase OS=Rosa chinensis OX=74649 GN=RchiOBHm_Chr3g0490181 PE=4 SV=1	Function unknown	uncharacterized aarF domain-containing protein kinase 1 [Fragaria vesca subsp. vesca]
							maker-Fvb1-4-augustus-gene-183.28	18368390	18370182	+	Signal transduction mechanisms	Molecular Function: calcium ion binding (GO:0005509);; Cellular Component: integral component of membrane (GO:0016021);; Biological Process: calcium-mediated signaling (GO:0019722);	K02183	Signal transduction mechanisms	EF hand	Calmodulin-1/11/16 OS=Daucus carota OX=4039 GN=CAM-1 PE=2 SV=2	Calmodulin OS=Medicago truncatula OX=3880 GN=MtrunA17_Chr3g0093271 PE=3 SV=1	Signal transduction mechanisms	putative EF-hand domain pair protein [Medicago truncatula]
							maker-Fvb1-4-augustus-gene-183.34	18355140	18360404	-	General function prediction only	Molecular Function: GTP binding (GO:0005525);; Molecular Function: hydrolase activity (GO:0016787);	K07955	General function prediction only	ADP-ribosylation factor family	ADP-ribosylation factor-like protein 8c OS=Arabidopsis thaliana OX=3702 GN=ARL8C PE=2 SV=1	Putative small GTPase superfamily, ARF/SAR type, P-loop containing nucleoside triphosphate hydrolase OS=Rosa chinensis OX=74649 GN=RchiOBHm_Chr3g0491081 PE=3 SV=1	Intracellular trafficking, secretion, and vesicular transport	ADP-ribosylation factor-like protein 8c [Rosa chinensis]
							maker-Fvb1-4-augustus-gene-183.35	18372914	18374796	-	--	Cellular Component: integral component of membrane (GO:0016021);	--	--	Salt stress response/antifungal	Plasmodesmata-located protein 7 OS=Arabidopsis thaliana OX=3702 GN=PDLP7 PE=1 SV=1	Putative Gnk2-like domain-containing protein OS=Rosa chinensis OX=74649 GN=RchiOBHm_Chr3g0491141 PE=4 SV=1	Function unknown	cysteine-rich repeat secretory protein 60 [Fragaria vesca subsp. vesca]
							maker-Fvb1-4-augustus-gene-184.20	18409344	18412093	+	Amino acid transport and metabolism	Molecular Function: glutamate-ammonia ligase activity (GO:0004356);; Molecular Function: ATP binding (GO:0005524);; Biological Process: glutamine biosynthetic process (GO:0006542);	K01915	Amino acid transport and metabolism	Glutamine synthetase, catalytic domain	Glutamine synthetase nodule isozyme OS=Vigna aconitifolia OX=3918 PE=2 SV=1	Glutamine synthetase OS=Prunus persica OX=3760 GN=PRUPE_3G166500 PE=3 SV=1	Amino acid transport and metabolism	glutamine synthetase nodule isozyme [Fragaria vesca subsp. vesca]
							maker-Fvb1-4-augustus-gene-184.23	18387110	18394799	-	--	Cellular Component: condensin complex (GO:0000796);; Biological Process: mitotic chromosome condensation (GO:0007076);	K06678	--	Nuclear condensing complex subunits, C-term domain	--	Putative nuclear condensin complex subunit 3 domain-containing protein OS=Rosa chinensis OX=74649 GN=RchiOBHm_Chr3g0491161 PE=3 SV=1	--	condensin complex subunit 3 isoform X1 [Fragaria vesca subsp. vesca]
							maker-Fvb1-4-snap-gene-183.37	18313692	18327095	+	General function prediction only	Molecular Function: hydrolase activity (GO:0016787);; Molecular Function: metal ion binding (GO:0046872);	K17732	Posttranslational modification, protein turnover, chaperones	Peptidase M16 inactive domain	Stromal processing peptidase, chloroplastic OS=Pisum sativum OX=3888 GN=SPP PE=1 SV=2	Putative processing peptidase OS=Rosa chinensis OX=74649 GN=RchiOBHm_Chr3g0491051 PE=4 SV=1	Posttranslational modification, protein turnover, chaperones	stromal processing peptidase, chloroplastic isoform X2 [Rosa chinensis]
							maker-Fvb1-4-snap-gene-183.40	18378331	18383170	+	--	--	K17402	--	--	--	Uncharacterized protein OS=Prunus dulcis OX=3755 GN=Prudu_1456S001300 PE=4 SV=1	--	dnaJ homolog subfamily C member 7 homolog [Fragaria vesca subsp. vesca]
							maker-Fvb1-4-snap-gene-183.42	18334878	18337147	-	Amino acid transport and metabolism	Molecular Function: threonine synthase activity (GO:0004795);; Biological Process: cellular amino acid metabolic process (GO:0006520);; Molecular Function: pyridoxal phosphate binding (GO:0030170);	K09422	--	Myb-like DNA-binding domain	Threonine synthase 1, chloroplastic OS=Arabidopsis thaliana OX=3702 GN=TS1 PE=1 SV=1	Threonine synthase OS=Rosa chinensis OX=74649 GN=RchiOBHm_Chr2g0094161 PE=3 SV=1	Posttranslational modification, protein turnover, chaperones	protein ODORANT1-like [Fragaria vesca subsp. vesca]
							maker-Fvb1-4-snap-gene-183.43	18347951	18351094	-	--	--	--	--	--	--	--	Signal transduction mechanisms	uncharacterized protein LOC105353354 [Fragaria vesca subsp. vesca]
							maker-Fvb1-4-snap-gene-183.46	18383898	18384609	-	--	Molecular Function: hydrolase activity (GO:0016787);	K07766	--	--	--	Putative hydrolase OS=Rosa chinensis OX=74649 GN=RchiOBHm_Chr3g0491151 PE=4 SV=1	Signal transduction mechanisms	nudix hydrolase 18, mitochondrial-like [Fragaria vesca subsp. vesca]
							snap_masked-Fvb1-4-processed-gene-183.18	18386135	18386749	+
Fvb1-4	21750001	21850000	99999	5	0.279607	3.10592
							maker-Fvb1-4-augustus-gene-218.22	21846270	21847646	+
							maker-Fvb1-4-augustus-gene-218.26	21812721	21813517	-	--	Biological Process: response to acid chemical (GO:0001101);; Biological Process: regulation of response to biotic stimulus (GO:0002831);; Biological Process: cell communication (GO:0007154);; Biological Process: signal transduction (GO:0007165);; Biological Process: biological_process (GO:0008150);; Biological Process: response to endogenous stimulus (GO:0009719);; Biological Process: response to…	K21994	--	Lateral organ boundaries (LOB) domain	LOB domain-containing protein 20 OS=Arabidopsis thaliana OX=3702 GN=LBD20 PE=2 SV=1	Putative transcription factor AS2-LOB family OS=Rosa chinensis OX=74649 GN=RchiOBHm_Chr3g0496241 PE=3 SV=1	Function unknown	LOB domain-containing protein 20 [Fragaria vesca subsp. vesca]
							maker-Fvb1-4-augustus-gene-218.28	21825152	21833216	-	Translation, ribosomal structure and biogenesis	Molecular Function: nucleotide binding (GO:0000166);; Molecular Function: 3'-5'-exoribonuclease activity (GO:0000175);; Cellular Component: nuclear exosome (RNase complex) (GO:0000176);; Biological Process: exonucleolytic trimming to generate mature 3'-end of 5.8S rRNA from tricistronic rRNA transcript (SSU-rRNA, 5.8S rRNA, LSU-rRNA) (GO:0000467);; Molecular Function: single-stranded RNA binding …	K12591	Translation, ribosomal structure and biogenesis	3'-5' exonuclease	Protein RRP6-like 2 OS=Arabidopsis thaliana OX=3702 GN=RRP6L2 PE=2 SV=1	HRDC domain-containing protein OS=Prunus persica OX=3760 GN=PRUPE_7G010800 PE=4 SV=1	Translation, ribosomal structure and biogenesis	exosome component 10 [Fragaria vesca subsp. vesca]
							maker-Fvb1-4-snap-gene-218.30	21805002	21808573	+	Inorganic ion transport and metabolism	Molecular Function: ATP binding (GO:0005524);; Cellular Component: plasma membrane (GO:0005886);; Molecular Function: proton-exporting ATPase activity, phosphorylative mechanism (GO:0008553);; Cellular Component: integral component of membrane (GO:0016021);; Molecular Function: hydrolase activity (GO:0016787);; Biological Process: proton export across plasma membrane (GO:0120029);	K01535	Inorganic ion transport and metabolism	--	Plasma membrane ATPase 1 OS=Solanum lycopersicum OX=4081 GN=LHA1 PE=2 SV=1	Plasma membrane ATPase OS=Rosa chinensis OX=74649 GN=RchiOBHm_Chr2g0169231 PE=3 SV=1	Inorganic ion transport and metabolism	plasma membrane ATPase 1-like isoform X1 [Fragaria vesca subsp. vesca]
							maker-Fvb1-4-snap-gene-218.35	21814077	21818743	-	--	Molecular Function: protein kinase activity (GO:0004672);; Molecular Function: ATP binding (GO:0005524);; Cellular Component: integral component of membrane (GO:0016021);	K13435	--	Protein tyrosine and serine/threonine kinase	Probable inactive leucine-rich repeat receptor-like protein kinase At3g03770 OS=Arabidopsis thaliana OX=3702 GN=At3g03770 PE=1 SV=1	Protein kinase domain-containing protein OS=Rosa chinensis OX=74649 GN=RchiOBHm_Chr3g0496251 PE=4 SV=1	Signal transduction mechanisms	probable inactive leucine-rich repeat receptor-like protein kinase At3g03770 [Fragaria vesca subsp. vesca]
Fvb2-1	15730001	15950000	219999	35	0.327868	3.86499
							augustus_masked-Fvb2-1-processed-gene-157.14	15745477	15746544	-	Cell wall/membrane/envelope biogenesis	Cellular Component: integral component of membrane (GO:0016021);; Molecular Function: transferase activity, transferring glycosyl groups (GO:0016757);	K20893	--	Glycosyl transferase family 8	Probable galacturonosyltransferase-like 4 OS=Arabidopsis thaliana OX=3702 GN=GATL4 PE=2 SV=1	Hexosyltransferase OS=Rosa chinensis OX=74649 GN=RchiOBHm_Chr6g0291941 PE=3 SV=1	Carbohydrate transport and metabolism	probable galacturonosyltransferase-like 4 [Fragaria vesca subsp. vesca]
							augustus_masked-Fvb2-1-processed-gene-157.17	15772141	15772533	-	--	Molecular Function: enzyme inhibitor activity (GO:0004857);	--	--	--	--	Putative pectinesterase inhibitor domain, Cell wall/vacuolar inhibitor of fructosidase OS=Rosa chinensis OX=74649 GN=RchiOBHm_Chr2g0143761 PE=4 SV=1	--	cell wall / vacuolar inhibitor of fructosidase 1 [Fragaria vesca subsp. vesca]
							augustus_masked-Fvb2-1-processed-gene-158.5	15810816	15820018	-	Carbohydrate transport and metabolism	Biological Process: carbohydrate transport (GO:0008643);; Cellular Component: integral component of membrane (GO:0016021);; Molecular Function: transmembrane transporter activity (GO:0022857);	K03444	General function prediction only	Sugar (and other) transporter	Sugar transporter ERD6-like 7 OS=Arabidopsis thaliana OX=3702 GN=At2g48020 PE=2 SV=2	Putative major facilitator, sugar transporter, major facilitator superfamily OS=Rosa chinensis OX=74649 GN=RchiOBHm_Chr6g0292141 PE=3 SV=1	Intracellular trafficking, secretion, and vesicular transport	sugar transporter ERD6-like 7 [Fragaria vesca subsp. vesca]
							augustus_masked-Fvb2-1-processed-gene-159.0	15886137	15886697	+	--	--	--	--	--	--	Putative F-box domain-containing protein OS=Rosa chinensis OX=74649 GN=RchiOBHm_Chr6g0292521 PE=4 SV=1	Function unknown	uncharacterized protein LOC105349770 [Fragaria vesca subsp. vesca]
							augustus_masked-Fvb2-1-processed-gene-159.13	15936677	15937084	-	--	--	--	--	--	--	--	--	uncharacterized protein LOC105349771 [Fragaria vesca subsp. vesca]
							augustus_masked-Fvb2-1-processed-gene-159.2	15908685	15910094	+	--	Biological Process: action potential (GO:0001508);; Biological Process: regulation of heart rate (GO:0002027);; Biological Process: system process (GO:0003008);; Biological Process: muscle system process (GO:0003012);; Biological Process: circulatory system process (GO:0003013);; Biological Process: heart process (GO:0003015);; Biological Process: cardiac chamber development (GO:0003205);; Biolog…	--	General function prediction only	Ankyrin repeats (3 copies)	Protein VAPYRIN-LIKE OS=Medicago truncatula OX=3880 GN=VPYL PE=2 SV=1	Putative major sperm protein (MSP) OS=Rosa chinensis OX=74649 GN=RchiOBHm_Chr6g0292251 PE=4 SV=1	Cell wall/membrane/envelope biogenesis	serine/threonine-protein phosphatase 6 regulatory ankyrin repeat subunit A-like [Fragaria vesca subsp. vesca]
							maker-Fvb2-1-augustus-gene-157.55	15734014	15738838	+	--	Molecular Function: dioxygenase activity (GO:0051213);	K10767	Function unknown	--	RNA demethylase ALKBH10B OS=Arabidopsis thaliana OX=3702 GN=ALKBH10B PE=1 SV=1	Putative oxoglutarate/iron-dependent dioxygenase, alpha-ketoglutarate-dependent dioxygenase AlkB OS=Rosa chinensis OX=74649 GN=RchiOBHm_Chr6g0291901 PE=4 SV=1	Replication, recombination and repair	uncharacterized protein LOC101299256 [Fragaria vesca subsp. vesca]
							maker-Fvb2-1-augustus-gene-157.56	15748386	15751064	+	Translation, ribosomal structure and biogenesis	Cellular Component: exosome (RNase complex) (GO:0000178);; Molecular Function: RNA binding (GO:0003723);	K03679	RNA processing and modification	KH domain	Exosome complex component RRP4 homolog OS=Arabidopsis thaliana OX=3702 GN=RRP4 PE=1 SV=1	Putative exosome complex RNA-binding protein 1/RRP40/RRP4 OS=Rosa chinensis OX=74649 GN=RchiOBHm_Chr6g0291951 PE=4 SV=1	RNA processing and modification	exosome complex component RRP4 [Fragaria vesca subsp. vesca]
							maker-Fvb2-1-augustus-gene-157.59	15751122	15753172	-	--	Molecular Function: auxin binding (GO:0010011);	--	--	Auxin binding protein	Auxin-binding protein T85 OS=Nicotiana tabacum OX=4097 GN=T85 PE=3 SV=1	Auxin-binding protein OS=Fragaria ananassa OX=3747 GN=ABP1 PE=4 SV=1	Function unknown	auxin-binding protein [Fragaria x ananassa]
							maker-Fvb2-1-augustus-gene-157.60	15753763	15758071	-	--	Cellular Component: integral component of membrane (GO:0016021);	--	--	--	Protein RESISTANCE TO PHYTOPHTHORA 1, chloroplastic OS=Arabidopsis thaliana OX=3702 GN=RPH1 PE=2 SV=2	Uncharacterized protein OS=Rosa chinensis OX=74649 GN=RchiOBHm_Chr6g0291981 PE=4 SV=1	--	uncharacterized protein LOC101300872 [Fragaria vesca subsp. vesca]
							maker-Fvb2-1-augustus-gene-157.61	15774332	15776662	-	--	Molecular Function: enzyme inhibitor activity (GO:0004857);	--	--	Plant invertase/pectin methylesterase inhibitor	--	Cell wall / vacuolar inhibitor of fructosidase 1-like OS=Pyrus ussuriensis x Pyrus communis OX=2448454 GN=D8674_009555 PE=4 SV=1	--	cell wall / vacuolar inhibitor of fructosidase 1-like [Pyrus ussuriensis x Pyrus communis]
							maker-Fvb2-1-augustus-gene-157.62	15780541	15782529	-	--	Molecular Function: DNA binding (GO:0003677);; Molecular Function: zinc ion binding (GO:0008270);; Cellular Component: host cell nucleus (GO:0042025);	--	--	Methyl-CpG binding domain	Methyl-CpG-binding domain-containing protein 4 OS=Arabidopsis thaliana OX=3702 GN=MBD4 PE=1 SV=1	Putative transcription factor & chromatin remodeling CW-Zn family OS=Rosa chinensis OX=74649 GN=RchiOBHm_Chr6g0292001 PE=4 SV=1	--	methyl-CpG-binding domain-containing protein 4-like [Fragaria vesca subsp. vesca]
							maker-Fvb2-1-augustus-gene-158.31	15789631	15793652	+	--	Molecular Function: molecular_function (GO:0003674);; Molecular Function: catalytic activity (GO:0003824);; Molecular Function: ubiquitin-protein transferase activity (GO:0004842);; Cellular Component: cellular_component (GO:0005575);; Cellular Component: intracellular (GO:0005622);; Cellular Component: obsolete cell (GO:0005623);; Cellular Component: cytoplasm (GO:0005737);; Biological Process: …	--	--	Zinc finger, C3HC4 type (RING finger)	Putative E3 ubiquitin-protein ligase RF4 OS=Arabidopsis thaliana OX=3702 GN=RF4 PE=3 SV=1	Putative transcription factor C2H2 family OS=Rosa chinensis OX=74649 GN=RchiOBHm_Chr6g0292011 PE=4 SV=1	Posttranslational modification, protein turnover, chaperones	putative E3 ubiquitin-protein ligase RF298 [Fragaria vesca subsp. vesca]
							maker-Fvb2-1-augustus-gene-158.34	15845836	15850995	+	--	Biological Process: microtubule cytoskeleton organization (GO:0000226);; Cellular Component: chromatin (GO:0000785);; Biological Process: regulation of cell-matrix adhesion (GO:0001952);; Biological Process: negative regulation of cell-matrix adhesion (GO:0001953);; Molecular Function: molecular_function (GO:0003674);; Molecular Function: chromatin binding (GO:0003682);; Molecular Function: signa…	--	General function prediction only	Breast carcinoma amplified sequence 3	Autophagy-related protein 18g OS=Arabidopsis thaliana OX=3702 GN=ATG18G PE=2 SV=1	Putative transcription factor WD40-like family OS=Rosa chinensis OX=74649 GN=RchiOBHm_Chr6g0292181 PE=4 SV=1	Function unknown	autophagy-related protein 18g-like [Fragaria vesca subsp. vesca]
							maker-Fvb2-1-augustus-gene-158.36	15867074	15870871	+	--	Molecular Function: molecular_function (GO:0003674);; Molecular Function: nucleic acid binding (GO:0003676);; Molecular Function: RNA binding (GO:0003723);; Molecular Function: catalytic activity (GO:0003824);; Molecular Function: nuclease activity (GO:0004518);; Molecular Function: endonuclease activity (GO:0004519);; Molecular Function: binding (GO:0005488);; Cellular Component: cellular_compon…	--	General function prediction only	PPR repeat family	Pentatricopeptide repeat-containing protein At2g30780 OS=Arabidopsis thaliana OX=3702 GN=At2g30780 PE=2 SV=1	Putative pentatricopeptide OS=Rosa chinensis OX=74649 GN=RchiOBHm_Chr6g0292231 PE=4 SV=1	Function unknown	pentatricopeptide repeat-containing protein At2g30780 [Fragaria vesca subsp. vesca]
							maker-Fvb2-1-augustus-gene-158.38	15874203	15877092	-	Lipid transport and metabolism	Molecular Function: methyl indole-3-acetate esterase activity (GO:0080030);	K14493	Defense mechanisms	alpha/beta hydrolase fold	Gibberellin receptor GID1B OS=Arabidopsis thaliana OX=3702 GN=GID1B PE=1 SV=1	Putative carboxylesterase OS=Rosa chinensis OX=74649 GN=RchiOBHm_Chr6g0292241 PE=3 SV=1	Defense mechanisms	gibberellin receptor GID1B-like [Fragaria vesca subsp. vesca]
							maker-Fvb2-1-augustus-gene-159.52	15925400	15932978	+	Signal transduction mechanisms	Molecular Function: protein serine/threonine phosphatase activity (GO:0004722);; Cellular Component: nucleus (GO:0005634);; Biological Process: brassinosteroid mediated signaling pathway (GO:0009742);; Molecular Function: metal ion binding (GO:0046872);	K01090	General function prediction only	Calcineurin-like phosphoesterase	Serine/threonine-protein phosphatase BSL1 OS=Arabidopsis thaliana OX=3702 GN=BSL1 PE=1 SV=2	Serine/threonine-protein phosphatase OS=Rosa chinensis OX=74649 GN=RchiOBHm_Chr6g0292301 PE=3 SV=1	Signal transduction mechanisms	putative protein-serine/threonine phosphatase [Rosa chinensis]
							maker-Fvb2-1-augustus-gene-159.54	15942694	15950234	-	--	Molecular Function: single-stranded DNA binding (GO:0003697);; Cellular Component: nucleus (GO:0005634);; Biological Process: flower development (GO:0009908);	--	--	--	Nodulin homeobox OS=Arabidopsis thaliana OX=3702 GN=NDX PE=2 SV=1	Putative Homeobox domain-containing protein OS=Rosa chinensis OX=74649 GN=RchiOBHm_Chr6g0292351 PE=4 SV=1	Transcription	uncharacterized protein LOC101306583 isoform X1 [Fragaria vesca subsp. vesca]
							maker-Fvb2-1-snap-gene-157.70	15753033	15756688	+	--	Molecular Function: double-stranded DNA binding (GO:0003690);; Biological Process: regulation of transcription, DNA-templated (GO:0006355);	K15032	--	mTERF	Transcription termination factor MTERF4, chloroplastic OS=Arabidopsis thaliana OX=3702 GN=MTERF4 PE=1 SV=1	Putative transcription regulator mTERF family OS=Rosa chinensis OX=74649 GN=RchiOBHm_Chr6g0291971 PE=3 SV=1	Transcription	uncharacterized protein LOC101300585 [Fragaria vesca subsp. vesca]
							maker-Fvb2-1-snap-gene-158.43	15852815	15853775	+	--	Biological Process: phosphorelay signal transduction system (GO:0000160);; Molecular Function: kinase activity (GO:0016301);	K14490	Signal transduction mechanisms	--	Histidine-containing phosphotransfer protein 1 OS=Arabidopsis thaliana OX=3702 GN=AHP1 PE=1 SV=1	Putative signal transduction histidine kinase, phosphotransfer (Hpt) domain-containing protein OS=Rosa chinensis OX=74649 GN=RchiOBHm_Chr6g0292191 PE=4 SV=1	Signal transduction mechanisms	histidine-containing phosphotransfer protein 2-like [Fragaria vesca subsp. vesca]
							maker-Fvb2-1-snap-gene-159.60	15886752	15906245	+	--	Molecular Function: protein binding (GO:0005515);	--	--	F-box domain	--	Putative F-box domain-containing protein OS=Rosa chinensis OX=74649 GN=RchiOBHm_Chr6g0292521 PE=4 SV=1	Function unknown	F-box/kelch-repeat protein At1g57790-like [Fragaria vesca subsp. vesca]
							maker-Fvb2-1-snap-gene-159.62	15912679	15924720	+	General function prediction only	Cellular Component: nucleosome (GO:0000786);; Molecular Function: DNA binding (GO:0003677);; Cellular Component: nucleus (GO:0005634);; Molecular Function: protein heterodimerization activity (GO:0046982);	K14521	Energy production and conversion	Aldo/keto reductase family	Histone H2AX OS=Cicer arietinum OX=3827 GN=HIS2A PE=2 SV=1	PREDICTED: NADP(H)-dependent aldo-keto reductase OS=Prunus dulcis OX=3755 GN=ALMOND_2B023374 PE=3 SV=1	Energy production and conversion	NADP(H)-dependent aldo-keto reductase [Prunus dulcis]
							maker-Fvb2-1-snap-gene-159.64	15939809	15940543	+
							maker-Fvb2-1-snap-gene-159.67	15932451	15933724	-	--	--	--	General function prediction only	--	--	Putative nucleic acid-binding protein OS=Rosa chinensis OX=74649 GN=RchiOBHm_Chr6g0292311 PE=4 SV=1	Function unknown	SOSS complex subunit B homolog [Fragaria vesca subsp. vesca]
							snap_masked-Fvb2-1-processed-gene-157.34	15756927	15772139	+	--	Cellular Component: integral component of membrane (GO:0016021);	K22128	Function unknown	Piezo non-specific cation channel, R-Ras-binding domain	Piezo-type mechanosensitive ion channel homolog OS=Arabidopsis thaliana OX=3702 GN=At2g48060/At2g48040/At2g48050 PE=2 SV=1	Putative Piezo family protein OS=Rosa chinensis OX=74649 GN=RchiOBHm_Chr6g0291991 PE=3 SV=1	Translation, ribosomal structure and biogenesis	piezo-type mechanosensitive ion channel homolog isoform X1 [Fragaria vesca subsp. vesca]
							snap_masked-Fvb2-1-processed-gene-157.40	15739704	15741176	-	--	--	--	Function unknown	BSD domain	--	Putative BSD domain-containing protein OS=Rosa chinensis OX=74649 GN=RchiOBHm_Chr6g0291911 PE=4 SV=1	Function unknown	BSD domain-containing protein 1 [Fragaria vesca subsp. vesca]
							snap_masked-Fvb2-1-processed-gene-158.10	15796364	15799374	+	General function prediction only	Molecular Function: endonuclease activity (GO:0004519);; Molecular Function: exonuclease activity (GO:0004527);	K13963	--	Endonuclease/Exonuclease/phosphatase family	--	Putative endonuclease/exonuclease/phosphatase OS=Rosa chinensis OX=74649 GN=RchiOBHm_Chr6g0292041 PE=4 SV=1	Function unknown	uncharacterized protein LOC101302029 [Fragaria vesca subsp. vesca]
							snap_masked-Fvb2-1-processed-gene-158.12	15833801	15836479	+	--	Molecular Function: protein serine/threonine kinase activity (GO:0004674);; Molecular Function: ATP binding (GO:0005524);	K01534	Signal transduction mechanisms	Protein kinase domain	Receptor-like cytosolic serine/threonine-protein kinase RBK2 OS=Arabidopsis thaliana OX=3702 GN=RBK2 PE=1 SV=1	Protein kinase domain-containing protein OS=Rosa chinensis OX=74649 GN=RchiOBHm_Chr6g0292171 PE=3 SV=1	Signal transduction mechanisms	receptor-like cytosolic serine/threonine-protein kinase RBK2 [Fragaria vesca subsp. vesca]
							snap_masked-Fvb2-1-processed-gene-158.22	15857828	15858163	-	--	--	--	--	--	--	Uncharacterized protein OS=Rhizophora mucronata OX=61149 PE=4 SV=1	--	--
							snap_masked-Fvb2-1-processed-gene-158.23	15858396	15858609	-
							snap_masked-Fvb2-1-processed-gene-158.24	15860066	15861911	-	--	--	K11801	--	--	--	LEC14B homolog OS=Rosa chinensis OX=74649 GN=RchiOBHm_Chr6g0292221 PE=3 SV=1	Function unknown	LEC14B protein isoform X1 [Fragaria vesca subsp. vesca]
							snap_masked-Fvb2-1-processed-gene-158.25	15862338	15863310	-
							snap_masked-Fvb2-1-processed-gene-159.34	15934071	15935552	-
							snap_masked-Fvb2-1-processed-gene-159.35	15935624	15936467	-	--	Cellular Component: nucleus (GO:0005634);; Molecular Function: methyltransferase activity (GO:0008168);; Biological Process: methylation (GO:0032259);	K11420	--	SAD/SRA domain	Histone-lysine N-methyltransferase, H3 lysine-9 specific SUVH8 OS=Arabidopsis thaliana OX=3702 GN=SUVH8 PE=3 SV=1	Putative methyltransferase OS=Rosa chinensis OX=74649 GN=RchiOBHm_Chr6g0292341 PE=4 SV=1	Chromatin structure and dynamics	uncharacterized protein LOC105349771 [Fragaria vesca subsp. vesca]
							snap_masked-Fvb2-1-processed-gene-159.37	15940154	15940397	-
Fvb2-1	16620001	16750000	129999	33	0.298923	2.19842
							augustus_masked-Fvb2-1-processed-gene-166.17	16625839	16626738	-	--	Biological Process: reproduction (GO:0000003);; Biological Process: developmental process involved in reproduction (GO:0003006);; Molecular Function: molecular_function (GO:0003674);; Molecular Function: catalytic activity (GO:0003824);; Molecular Function: ubiquitin-protein transferase activity (GO:0004842);; Cellular Component: cellular_component (GO:0005575);; Cellular Component: intracellular…	--	--	--	Phytochrome A-associated F-box protein OS=Arabidopsis thaliana OX=3702 GN=EID1 PE=1 SV=2	Putative F-box domain-containing protein OS=Rosa chinensis OX=74649 GN=RchiOBHm_Chr6g0293871 PE=4 SV=1	Function unknown	phytochrome A-associated F-box protein [Fragaria vesca subsp. vesca]
							augustus_masked-Fvb2-1-processed-gene-166.6	16628210	16631587	+	--	--	--	--	--	--	--	Posttranslational modification, protein turnover, chaperones	uncharacterized protein LOC101308491 [Fragaria vesca subsp. vesca]
							augustus_masked-Fvb2-1-processed-gene-167.0	16691151	16691649	+	--	--	--	--	PPR repeat	--	Putative tetratricopeptide-like helical domain, DYW domain-containing protein OS=Rosa chinensis OX=74649 GN=RchiOBHm_Chr7g0193611 PE=4 SV=1	Function unknown	putative pentatricopeptide repeat-containing protein At3g01580 [Fragaria vesca subsp. vesca]
							augustus_masked-Fvb2-1-processed-gene-167.13	16746978	16747478	-	--	--	--	--	Protein of unknown function, DUF538	--	Uncharacterized protein OS=Rosa chinensis OX=74649 GN=RchiOBHm_Chr6g0294211 PE=4 SV=1	Function unknown	uncharacterized protein At5g01610-like [Fragaria vesca subsp. vesca]
							augustus_masked-Fvb2-1-processed-gene-167.14	16749539	16750045	-	--	--	--	--	Protein of unknown function, DUF538	--	Uncharacterized protein OS=Rosa chinensis OX=74649 GN=RchiOBHm_Chr6g0294221 PE=4 SV=1	Function unknown	uncharacterized protein At5g01610-like [Fragaria vesca subsp. vesca]
							maker-Fvb2-1-augustus-gene-166.58	16619572	16621463	+	Signal transduction mechanisms	Molecular Function: nucleotide binding (GO:0000166);; Molecular Function: molecular_function (GO:0003674);; Molecular Function: binding (GO:0005488);; Cellular Component: cellular_component (GO:0005575);; Cellular Component: obsolete cell (GO:0005623);; Cellular Component: plasma membrane (GO:0005886);; Molecular Function: drug binding (GO:0008144);; Cellular Component: membrane (GO:0016020);; Mo…	--	--	Universal stress protein family	--	Putative universal stress protein A OS=Rosa chinensis OX=74649 GN=RchiOBHm_Chr6g0293841 PE=4 SV=1	Signal transduction mechanisms	universal stress protein A-like protein [Fragaria vesca subsp. vesca]
							maker-Fvb2-1-augustus-gene-166.60	16644584	16647120	+	--	--	K19562	--	--	--	Uncharacterized protein OS=Prunus persica OX=3760 GN=PRUPE_8G261000 PE=4 SV=1	--	uncharacterized protein LOC101313678 [Fragaria vesca subsp. vesca]
							maker-Fvb2-1-augustus-gene-166.62	16670926	16672419	+	--	Molecular Function: structural constituent of ribosome (GO:0003735);; Cellular Component: ribosome (GO:0005840);; Biological Process: translation (GO:0006412);	K02891	Translation, ribosomal structure and biogenesis	Ribosomal L22e protein family	60S ribosomal protein L22-2 OS=Arabidopsis thaliana OX=3702 GN=RPL22B PE=2 SV=1	Putative ribosomal protein L22e OS=Rosa chinensis OX=74649 GN=RchiOBHm_Chr6g0294041 PE=3 SV=1	Translation, ribosomal structure and biogenesis	60S ribosomal protein L22-2 [Fragaria vesca subsp. vesca]
							maker-Fvb2-1-augustus-gene-166.64	16682831	16684772	+	Secondary metabolites biosynthesis, transport and catabolism	Molecular Function: methyltransferase activity (GO:0008168);; Biological Process: methylation (GO:0032259);	--	--	Leucine carboxyl methyltransferase	O-methyltransferase 1, chloroplastic OS=Oryza sativa subsp. japonica OX=39947 GN=MTS1 PE=1 SV=1	Putative methyltransferase Ppm1/Ppm2/Tcmp, S-adenosyl-L-methionine-dependent methyltransferase OS=Rosa chinensis OX=74649 GN=RchiOBHm_Chr6g0294111 PE=3 SV=1	Secondary metabolites biosynthesis, transport and catabolism	uncharacterized protein LOC101310279 [Fragaria vesca subsp. vesca]
							maker-Fvb2-1-augustus-gene-166.68	16622442	16625136	-	--	Biological Process: transcription by RNA polymerase III (GO:0006383);	K15201	Transcription	Tetratricopeptide repeat	--	Putative 43kDa postsynaptic protein OS=Rosa chinensis OX=74649 GN=RchiOBHm_Chr6g0293861 PE=4 SV=1	Transcription	general transcription factor 3C polypeptide 3-like [Fragaria vesca subsp. vesca]
							maker-Fvb2-1-augustus-gene-166.70	16634665	16641457	-	--	Molecular Function: oxidoreductase activity (GO:0016491);	K12890	--	NADH:ubiquinone oxidoreductase, NDUFS5-15kDa	NADH dehydrogenase [ubiquinone] iron-sulfur protein 5-A OS=Arabidopsis thaliana OX=3702 GN=At2g47690 PE=3 SV=1	Putative NADH:ubiquinone reductase (H(+)-translocating) OS=Rosa chinensis OX=74649 GN=RchiOBHm_Chr6g0293941 PE=3 SV=1	RNA processing and modification	serine/arginine-rich-splicing factor SR34-like isoform X3 [Fragaria vesca subsp. vesca]
							maker-Fvb2-1-augustus-gene-166.71	16647199	16649830	-	--	Biological Process: ribosomal large subunit assembly (GO:0000027);; Molecular Function: molecular_function (GO:0003674);; Molecular Function: nucleic acid binding (GO:0003676);; Molecular Function: RNA binding (GO:0003723);; Molecular Function: binding (GO:0005488);; Cellular Component: cellular_component (GO:0005575);; Biological Process: organelle organization (GO:0006996);; Biological Process:…	K14859	Translation, ribosomal structure and biogenesis	Brix domain	Peter Pan-like protein OS=Arabidopsis thaliana OX=3702 GN=PPAN PE=1 SV=1	Putative Brix domain-containing protein OS=Rosa chinensis OX=74649 GN=RchiOBHm_Chr6g0293981 PE=4 SV=1	Translation, ribosomal structure and biogenesis	peter Pan-like protein [Fragaria vesca subsp. vesca]
							maker-Fvb2-1-augustus-gene-166.73	16668680	16670290	-	--	Cellular Component: TIM22 mitochondrial import inner membrane insertion complex (GO:0042721);; Biological Process: protein insertion into mitochondrial inner membrane (GO:0045039);	K17790	--	--	Outer envelope pore protein 16-4, chloroplastic OS=Arabidopsis thaliana OX=3702 GN=OEP164 PE=2 SV=1	Mitochondrial inner membrane translocase subunit Tim17/Tim22/Tim23/peroxisomal protein PMP24 OS=Rosa chinensis OX=74649 GN=RchiOBHm_Chr6g0294031 PE=4 SV=1	Intracellular trafficking, secretion, and vesicular transport	outer envelope pore protein 16-4, chloroplastic [Fragaria vesca subsp. vesca]
							maker-Fvb2-1-augustus-gene-166.74	16678897	16681559	-	Replication, recombination and repair	Molecular Function: DNA (6-4) photolyase activity (GO:0003914);	K01669	--	DNA photolyase	Blue-light photoreceptor PHR2 OS=Arabidopsis thaliana OX=3702 GN=PHR2 PE=2 SV=2	Putative (6-4)DNA photolyase OS=Rosa chinensis OX=74649 GN=RchiOBHm_Chr6g0294101 PE=4 SV=1	--	blue-light photoreceptor PHR2 [Fragaria vesca subsp. vesca]
							maker-Fvb2-1-augustus-gene-167.45	16716990	16717939	+	--	--	--	--	Late embryogenesis abundant protein	Indole-3-acetic acid-induced protein ARG2 OS=Vigna radiata var. radiata OX=3916 GN=ARG2 PE=2 SV=1	Putative Late embryogenesis abundant protein, LEA5-type OS=Rosa chinensis OX=74649 GN=RchiOBHm_Chr6g0294191 PE=4 SV=1	--	indole-3-acetic acid-induced protein ARG2 [Fragaria vesca subsp. vesca]
							maker-Fvb2-1-augustus-gene-167.52	16703940	16708330	-	Transcription	Molecular Function: NAD+ ADP-ribosyltransferase activity (GO:0003950);; Biological Process: protein ADP-ribosylation (GO:0006471);	K10798	--	Poly(ADP-ribose) polymerase catalytic domain	Poly [ADP-ribose] polymerase 2 OS=Arabidopsis thaliana OX=3702 GN=PARP2 PE=2 SV=1	Poly [ADP-ribose] polymerase OS=Rosa chinensis OX=74649 GN=RchiOBHm_Chr6g0294171 PE=4 SV=1	--	poly [ADP-ribose] polymerase 2 isoform X1 [Rosa chinensis]
							maker-Fvb2-1-augustus-gene-167.53	16710115	16710702	-	--	Molecular Function: NAD+ ADP-ribosyltransferase activity (GO:0003950);; Biological Process: protein ADP-ribosylation (GO:0006471);	K10798	--	SAP domain	--	Poly [ADP-ribose] polymerase OS=Rosa chinensis OX=74649 GN=RchiOBHm_Chr6g0294171 PE=4 SV=1	--	poly [ADP-ribose] polymerase 2 [Fragaria vesca subsp. vesca]
							maker-Fvb2-1-augustus-gene-167.54	16711280	16714218	-	--	Molecular Function: RNA binding (GO:0003723);	K11091	RNA processing and modification	RNA recognition motif. (a.k.a. RRM, RBD, or RNP domain)	U1 small nuclear ribonucleoprotein A OS=Arabidopsis thaliana OX=3702 GN=U1A PE=1 SV=1	Putative nucleotide-binding alpha-beta plait domain-containing protein OS=Rosa chinensis OX=74649 GN=RchiOBHm_Chr6g0294181 PE=4 SV=1	RNA processing and modification	U1 small nuclear ribonucleoprotein A [Fragaria vesca subsp. vesca]
							maker-Fvb2-1-snap-gene-166.80	16659093	16663382	+	Cell wall/membrane/envelope biogenesis	Cellular Component: integral component of membrane (GO:0016021);	K08678	--	GDP-mannose 4,6 dehydratase	UDP-glucuronic acid decarboxylase 2 OS=Arabidopsis thaliana OX=3702 GN=UXS2 PE=1 SV=1	UDP-glucuronic acid decarboxylase 2 OS=Prunus yedoensis var. nudiflora OX=2094558 GN=Pyn_33958 PE=4 SV=1	--	UDP-glucuronic acid decarboxylase 2 [Fragaria vesca subsp. vesca]
							maker-Fvb2-1-snap-gene-166.82	16674030	16677333	+	Inorganic ion transport and metabolism	Cellular Component: integral component of membrane (GO:0016021);; Biological Process: transmembrane transport (GO:0055085);	K03452	--	Sodium/calcium exchanger protein	Magnesium/proton exchanger OS=Arabidopsis halleri subsp. halleri OX=81971 GN=MHX PE=1 SV=1	Putative sodium/calcium exchanger membrane region OS=Rosa chinensis OX=74649 GN=RchiOBHm_Chr6g0294071 PE=4 SV=1	--	magnesium/proton exchanger [Fragaria vesca subsp. vesca]
							maker-Fvb2-1-snap-gene-166.91	16625250	16625628	-
							maker-Fvb2-1-snap-gene-166.95	16659172	16660233	-	--	--	--	--	--	--	Os07g0674150 protein (Fragment) OS=Oryza sativa subsp. japonica OX=39947 GN=Os07g0674150 PE=4 SV=1	--	Os07g0674150, partial [Oryza sativa Japonica Group]
							maker-Fvb2-1-snap-gene-167.59	16720790	16721624	+	--	--	--	--	--	--	Uncharacterized protein OS=Asparagus officinalis OX=4686 GN=A4U43_C07F14030 PE=4 SV=1	--	uncharacterized protein A4U43_C07F14030 [Asparagus officinalis]
							maker-Fvb2-1-snap-gene-167.60	16726742	16727259	+	--	Molecular Function: DNA binding (GO:0003677);; Biological Process: transcription, DNA-templated (GO:0006351);; Cellular Component: transcription repressor complex (GO:0017053);	--	--	--	--	Putative transcription factor MYB/SANT family OS=Rosa chinensis OX=74649 GN=RchiOBHm_Chr4g0421591 PE=4 SV=1	--	uncharacterized protein LOC101307386 [Fragaria vesca subsp. vesca]
							maker-Fvb2-1-snap-gene-167.61	16727294	16729372	+	--	Molecular Function: transaminase activity (GO:0008483);	--	--	--	--	Putative aminotransferase-like, plant mobile domain-containing protein OS=Rosa chinensis OX=74649 GN=RchiOBHm_Chr1g0318221 PE=4 SV=1	--	uncharacterized protein LOC101307386 [Fragaria vesca subsp. vesca]
							maker-Fvb2-1-snap-gene-167.62	16744881	16745968	+	--	Molecular Function: cysteine-type peptidase activity (GO:0008234);	--	--	--	--	Putative Ulp1 protease family catalytic domain-containing protein OS=Rosa chinensis OX=74649 GN=RchiOBHm_Chr5g0072851 PE=3 SV=1	--	uncharacterized protein LOC105351672 [Fragaria vesca subsp. vesca]
							maker-Fvb2-1-snap-gene-167.67	16685236	16696994	-	--	Biological Process: rRNA processing (GO:0006364);; Cellular Component: small-subunit processome (GO:0032040);	K14567	Function unknown	Utp14 protein	--	Putative small-subunit processome, Utp14 protein OS=Rosa chinensis OX=74649 GN=RchiOBHm_Chr6g0294141 PE=4 SV=1	Function unknown	uncharacterized protein C57A7.06 [Fragaria vesca subsp. vesca]
							snap_masked-Fvb2-1-processed-gene-166.31	16625878	16626225	+	--	--	--	--	--	--	Uncharacterized protein OS=Malus baccata OX=106549 GN=C1H46_030283 PE=4 SV=1	--	hypothetical protein C1H46_030283 [Malus baccata]
							snap_masked-Fvb2-1-processed-gene-166.32	16626410	16626697	+
							snap_masked-Fvb2-1-processed-gene-166.36	16650912	16651235	+	--	Molecular Function: enzyme inhibitor activity (GO:0004857);; Molecular Function: pectinesterase activity (GO:0030599);	K01051	--	Plant invertase/pectin methylesterase inhibitor	Pectinesterase inhibitor 6 OS=Arabidopsis thaliana OX=3702 GN=PMEI6 PE=2 SV=1	Putative pectinesterase OS=Rosa chinensis OX=74649 GN=RchiOBHm_Chr6g0293991 PE=4 SV=1	Function unknown	21 kDa protein-like [Fragaria vesca subsp. vesca]
							snap_masked-Fvb2-1-processed-gene-166.53	16662109	16666432	-	Lipid transport and metabolism	Molecular Function: 2-acylglycerol O-acyltransferase activity (GO:0003846);	K18368	Lipid transport and metabolism	Serine aminopeptidase, S33	Caffeoylshikimate esterase OS=Arabidopsis thaliana OX=3702 GN=CSE PE=1 SV=1	Putative 2-acylglycerol O-acyltransferase OS=Rosa chinensis OX=74649 GN=RchiOBHm_Chr6g0294021 PE=4 SV=1	Lipid transport and metabolism	caffeoylshikimate esterase-like [Rosa chinensis]
							snap_masked-Fvb2-1-processed-gene-167.26	16748268	16749645	+
							snap_masked-Fvb2-1-processed-gene-167.33	16720082	16721663	-	--	--	--	--	Protein of unknown function, DUF538	--	Uncharacterized protein OS=Rosa chinensis OX=74649 GN=RchiOBHm_Chr6g0294201 PE=4 SV=1	Function unknown	uncharacterized protein LOC101311147 [Fragaria vesca subsp. vesca]
Fvb2-1	16820001	16990000	169999	20	0.302153	2.1365
							augustus_masked-Fvb2-1-processed-gene-169.2	16909389	16910048	+	--	Cellular Component: integral component of membrane (GO:0016021);	--	--	Late embryogenesis abundant protein	--	Uncharacterized protein OS=Rosa chinensis OX=74649 GN=RchiOBHm_Chr5g0069811 PE=4 SV=1	Function unknown	protein YLS9-like [Fragaria vesca subsp. vesca]
							augustus_masked-Fvb2-1-processed-gene-169.3	16911338	16912648	+	--	Molecular Function: DNA binding (GO:0003677);; Molecular Function: DNA-binding transcription factor activity (GO:0003700);; Cellular Component: nucleus (GO:0005634);	K09286	--	--	Ethylene-responsive transcription factor ERF071 OS=Arabidopsis thaliana OX=3702 GN=ERF071 PE=2 SV=1	Putative transcription factor AP2-EREBP family OS=Rosa chinensis OX=74649 GN=RchiOBHm_Chr6g0294441 PE=4 SV=1	Transcription	ethylene-responsive transcription factor ERF071 isoform X1 [Fragaria vesca subsp. vesca]
							augustus_masked-Fvb2-1-processed-gene-169.4	16919686	16920751	+	Posttranslational modification, protein turnover, chaperones	Molecular Function: serine-type endopeptidase activity (GO:0004252);	--	--	Subtilase family	Subtilisin-like protease SBT1.4 OS=Arabidopsis thaliana OX=3702 GN=SBT1.4 PE=2 SV=1	Putative tripeptidyl-peptidase II OS=Rosa chinensis OX=74649 GN=RchiOBHm_Chr2g0146061 PE=3 SV=1	Posttranslational modification, protein turnover, chaperones	subtilisin-like protease [Fragaria vesca subsp. vesca]
							augustus_masked-Fvb2-1-processed-gene-169.7	16949507	16950533	+
							maker-Fvb2-1-augustus-gene-168.29	16820282	16821485	+	--	Molecular Function: enzyme inhibitor activity (GO:0004857);; Molecular Function: pectinesterase activity (GO:0030599);; Biological Process: cell wall modification (GO:0042545);; Molecular Function: aspartyl esterase activity (GO:0045330);; Biological Process: pectin catabolic process (GO:0045490);	K01051	--	Pectinesterase	Probable pectinesterase/pectinesterase inhibitor 40 OS=Arabidopsis thaliana OX=3702 GN=PME40 PE=2 SV=1	Pectinesterase OS=Rosa chinensis OX=74649 GN=RchiOBHm_Chr6g0294341 PE=3 SV=1	Carbohydrate transport and metabolism	pectinesterase-like [Fragaria vesca subsp. vesca]
							maker-Fvb2-1-augustus-gene-169.53	16902561	16906796	+	--	Molecular Function: RNA binding (GO:0003723);	--	--	APO RNA-binding	APO protein 2, chloroplastic OS=Arabidopsis thaliana OX=3702 GN=APO2 PE=2 SV=1	Putative APO domain-containing protein OS=Rosa chinensis OX=74649 GN=RchiOBHm_Chr6g0294401 PE=4 SV=1	Function unknown	APO protein 2, chloroplastic [Fragaria vesca subsp. vesca]
							maker-Fvb2-1-augustus-gene-169.55	16924341	16926248	+	Translation, ribosomal structure and biogenesis	Molecular Function: RNA binding (GO:0003723);; Molecular Function: structural constituent of ribosome (GO:0003735);; Biological Process: translation (GO:0006412);; Cellular Component: cytosolic large ribosomal subunit (GO:0022625);	K02885	Translation, ribosomal structure and biogenesis	Ribosomal protein L19e	60S ribosomal protein L19-1 OS=Arabidopsis thaliana OX=3702 GN=RPL19A PE=2 SV=1	Ribosomal protein L19 OS=Rosa chinensis OX=74649 GN=RchiOBHm_Chr6g0294481 PE=3 SV=1	Translation, ribosomal structure and biogenesis	60S ribosomal protein L19-1 [Fragaria vesca subsp. vesca]
							maker-Fvb2-1-augustus-gene-169.56	16943230	16945749	+	Carbohydrate transport and metabolism	Molecular Function: polygalacturonase activity (GO:0004650);; Biological Process: carbohydrate metabolic process (GO:0005975);; Cellular Component: integral component of membrane (GO:0016021);; Molecular Function: galacturan 1,4-alpha-galacturonidase activity (GO:0047911);	K01184	--	Glycosyl hydrolases family 28	Probable polygalacturonase OS=Vitis vinifera OX=29760 GN=GSVIVT00026920001 PE=1 SV=1	Putative galacturan 1,4-alpha-galacturonidase OS=Rosa chinensis OX=74649 GN=RchiOBHm_Chr6g0294531 PE=3 SV=1	Carbohydrate transport and metabolism	probable polygalacturonase isoform X2 [Fragaria vesca subsp. vesca]
							maker-Fvb2-1-augustus-gene-169.62	16913240	16916876	-	Coenzyme transport and metabolism	Biological Process: protein lipoylation (GO:0009249);; Molecular Function: lipoyl(octanoyl) transferase activity (GO:0033819);; Molecular Function: octanoyl transferase activity (acting on glycine-cleavage complex H protein) (GO:0102555);	K03801	--	Biotin/lipoate A/B protein ligase family	Octanoyltransferase LIP2p2, chloroplastic OS=Arabidopsis thaliana OX=3702 GN=LIP2P2 PE=1 SV=1	Lipoyl(octanoyl) transferase OS=Rosa chinensis OX=74649 GN=RchiOBHm_Chr6g0294461 PE=3 SV=1	--	putative lipoyltransferase-like protein, chloroplastic [Fragaria vesca subsp. vesca]
							maker-Fvb2-1-augustus-gene-169.63	16917649	16918757	-	--	--	--	--	--	--	--	--	uncharacterized protein LOC105349792 [Fragaria vesca subsp. vesca]
							maker-Fvb2-1-augustus-gene-169.64	16926484	16930731	-	--	Molecular Function: phosphorelay sensor kinase activity (GO:0000155);; Cellular Component: integral component of membrane (GO:0016021);	K14509	Signal transduction mechanisms	Histidine kinase-, DNA gyrase B-, and HSP90-like ATPase	Probable ethylene response sensor 1 OS=Oryza sativa subsp. indica OX=39946 GN=ERS1 PE=2 SV=1	Ethylene receptor OS=Fragaria ananassa OX=3747 GN=ers1 PE=2 SV=1	Signal transduction mechanisms	ethylene response sensor 1 [Fragaria vesca subsp. vesca]
							maker-Fvb2-1-snap-gene-168.47	16859672	16861949	-
							maker-Fvb2-1-snap-gene-169.69	16891082	16892540	+	--	Molecular Function: protein kinase activity (GO:0004672);; Molecular Function: ATP binding (GO:0005524);	K13416	Signal transduction mechanisms	Protein tyrosine and serine/threonine kinase	Probable leucine-rich repeat receptor-like protein kinase At2g28990 OS=Arabidopsis thaliana OX=3702 GN=At2g28990 PE=1 SV=1	Putative receptor-like protein kinase OS=Prunus yedoensis var. nudiflora OX=2094558 GN=Pyn_28737 PE=4 SV=1	Signal transduction mechanisms	probable receptor-like protein kinase At1g80640 [Fragaria vesca subsp. vesca]
							maker-Fvb2-1-snap-gene-169.70	16894114	16901711	+	--	Molecular Function: GTP diphosphokinase activity (GO:0008728);; Molecular Function: guanosine-3',5'-bis(diphosphate) 3'-diphosphatase activity (GO:0008893);; Biological Process: guanosine tetraphosphate metabolic process (GO:0015969);; Molecular Function: kinase activity (GO:0016301);	K00951	Signal transduction mechanisms	HD domain	Putative GTP diphosphokinase RSH1, chloroplastic OS=Arabidopsis thaliana OX=3702 GN=RSH1 PE=1 SV=1	GTP diphosphokinase OS=Rosa chinensis OX=74649 GN=RchiOBHm_Chr6g0294391 PE=3 SV=1	Signal transduction mechanisms	putative GTP diphosphokinase RSH1, chloroplastic [Fragaria vesca subsp. vesca]
							maker-Fvb2-1-snap-gene-169.76	16952007	16952630	+
							maker-Fvb2-1-snap-gene-169.77	16969465	16970629	+	--	Molecular Function: RNA polymerase II transcription regulatory region sequence-specific DNA binding (GO:0000977);; Molecular Function: DNA-binding transcription factor activity (GO:0003700);; Cellular Component: nucleus (GO:0005634);; Biological Process: positive regulation of transcription by RNA polymerase II (GO:0045944);; Molecular Function: protein dimerization activity (GO:0046983);	--	Transcription	--	Agamous-like MADS-box protein AGL104 OS=Arabidopsis thaliana OX=3702 GN=AGL104 PE=1 SV=1	Putative transcription factor MADS-MIKC family OS=Rosa chinensis OX=74649 GN=RchiOBHm_Chr7g0240061 PE=4 SV=1	Transcription	MADS-box transcription factor 5 isoform X1 [Fragaria vesca subsp. vesca]
							maker-Fvb2-1-snap-gene-169.78	16903704	16907658	-	--	Cellular Component: proteasome complex (GO:0000502);	K03029	Posttranslational modification, protein turnover, chaperones	von Willebrand factor type A domain	26S proteasome non-ATPase regulatory subunit 4 homolog OS=Arabidopsis thaliana OX=3702 GN=RPN10 PE=1 SV=1	Putative proteasome subunit Rpn10 protein OS=Rosa chinensis OX=74649 GN=RchiOBHm_Chr6g0294421 PE=3 SV=1	Posttranslational modification, protein turnover, chaperones	26S proteasome non-ATPase regulatory subunit 4 homolog [Fragaria vesca subsp. vesca]
							maker-Fvb2-1-snap-gene-169.83	16924378	16925222	-	--	--	--	--	--	--	Uncharacterized protein OS=Malus baccata OX=106549 GN=C1H46_009802 PE=4 SV=1	--	hypothetical protein C1H46_009802 [Malus baccata]
							maker-Fvb2-1-snap-gene-169.85	16931448	16939716	-	Energy production and conversion	Molecular Function: fumarate hydratase activity (GO:0004333);; Biological Process: tricarboxylic acid cycle (GO:0006099);; Biological Process: fumarate metabolic process (GO:0006106);; Cellular Component: tricarboxylic acid cycle enzyme complex (GO:0045239);	K01679	Energy production and conversion	Lyase	Fumarate hydratase 1, mitochondrial OS=Arabidopsis thaliana OX=3702 GN=FUM1 PE=1 SV=2	Fumarate hydratase OS=Rosa chinensis OX=74649 GN=RchiOBHm_Chr6g0294521 PE=3 SV=1	Energy production and conversion	fumarate hydratase 1, mitochondrial isoform X2 [Fragaria vesca subsp. vesca]
							maker-Fvb2-1-snap-gene-169.86	16946015	16960564	-	--	Molecular Function: microtubule motor activity (GO:0003777);; Molecular Function: ATP binding (GO:0005524);; Biological Process: defense response (GO:0006952);; Biological Process: microtubule-based movement (GO:0007018);; Molecular Function: microtubule binding (GO:0008017);	K10406	Cytoskeleton	Kinesin motor domain	Kinesin-like protein KIN-14I OS=Arabidopsis thaliana OX=3702 GN=KIN14I PE=2 SV=1	P-loop nucleoside triphosphate hydrolases superfamily protein with Calponin Homology domain OS=Prunus dulcis OX=3755 GN=Prudu_018292 PE=3 SV=1	Cytoskeleton	kinesin-4 [Fragaria vesca subsp. vesca]
Fvb2-1	19250001	19370000	119999	16	0.369962	2.74374
							augustus_masked-Fvb2-1-processed-gene-192.13	19267610	19270867	-	--	Molecular Function: RNA binding (GO:0003723);; Molecular Function: RNA-directed 5'-3' RNA polymerase activity (GO:0003968);; Biological Process: gene silencing by RNA (GO:0031047);	K11699	RNA processing and modification	RNA dependent RNA polymerase	RNA-dependent RNA polymerase 6 OS=Arabidopsis thaliana OX=3702 GN=RDR6 PE=1 SV=1	RNA-dependent RNA polymerase OS=Rosa chinensis OX=74649 GN=RchiOBHm_Chr6g0298021 PE=3 SV=1	RNA processing and modification	RNA-dependent RNA polymerase 6-like [Fragaria vesca subsp. vesca]
							augustus_masked-Fvb2-1-processed-gene-192.15	19274665	19275627	-	--	Molecular Function: RNA binding (GO:0003723);; Molecular Function: RNA-directed 5'-3' RNA polymerase activity (GO:0003968);; Biological Process: gene silencing by RNA (GO:0031047);	K11699	RNA processing and modification	--	RNA-dependent RNA polymerase 6 OS=Arabidopsis thaliana OX=3702 GN=RDR6 PE=1 SV=1	RNA-dependent RNA polymerase OS=Rosa chinensis OX=74649 GN=RchiOBHm_Chr4g0412141 PE=3 SV=1	RNA processing and modification	RNA-dependent RNA polymerase 6 isoform X2 [Fragaria vesca subsp. vesca]
							augustus_masked-Fvb2-1-processed-gene-193.10	19348501	19349754	-	--	Cellular Component: integral component of membrane (GO:0016021);	K09422	--	Plant protein of unknown function	UPF0481 protein At3g47200 OS=Arabidopsis thaliana OX=3702 GN=At3g47200 PE=2 SV=1	Uncharacterized protein OS=Rosa chinensis OX=74649 GN=RchiOBHm_Chr6g0244001 PE=4 SV=1	--	uncharacterized protein LOC101313379 [Fragaria vesca subsp. vesca]
							augustus_masked-Fvb2-1-processed-gene-193.6	19328933	19331189	+	--	Molecular Function: protein kinase activity (GO:0004672);; Molecular Function: ATP binding (GO:0005524);; Cellular Component: integral component of membrane (GO:0016021);; Molecular Function: carbohydrate binding (GO:0030246);	K22133	--	Protein kinase domain	Probable L-type lectin-domain containing receptor kinase S.5 OS=Arabidopsis thaliana OX=3702 GN=LECRKS5 PE=2 SV=1	Protein kinase domain-containing protein OS=Rosa chinensis OX=74649 GN=RchiOBHm_Chr6g0298101 PE=3 SV=1	Signal transduction mechanisms	probable L-type lectin-domain containing receptor kinase S.5 [Fragaria vesca subsp. vesca]
							augustus_masked-Fvb2-1-processed-gene-193.7	19341001	19342035	+	--	Cellular Component: integral component of membrane (GO:0016021);	K15280	--	Triose-phosphate Transporter family	Probable sugar phosphate/phosphate translocator At5g25400 OS=Arabidopsis thaliana OX=3702 GN=At5g25400 PE=2 SV=1	Putative sugar phosphate transporter domain-containing protein OS=Rosa chinensis OX=74649 GN=RchiOBHm_Chr6g0298121 PE=4 SV=1	--	probable sugar phosphate/phosphate translocator At5g25400 [Fragaria vesca subsp. vesca]
							maker-Fvb2-1-augustus-gene-192.55	19271566	19274530	-	--	Molecular Function: RNA binding (GO:0003723);; Molecular Function: RNA-directed 5'-3' RNA polymerase activity (GO:0003968);; Biological Process: gene silencing by RNA (GO:0031047);	K11699	RNA processing and modification	RNA dependent RNA polymerase	RNA-dependent RNA polymerase 6 OS=Arabidopsis thaliana OX=3702 GN=RDR6 PE=1 SV=1	RNA-dependent RNA polymerase OS=Rosa chinensis OX=74649 GN=RchiOBHm_Chr4g0412141 PE=3 SV=1	RNA processing and modification	RNA-dependent RNA polymerase 6 isoform X2 [Fragaria vesca subsp. vesca]
							maker-Fvb2-1-augustus-gene-193.38	19295590	19297020	-	--	--	--	--	--	Protein BUNDLE SHEATH DEFECTIVE 2, chloroplastic OS=Zea mays OX=4577 GN=BSD2 PE=2 SV=1	Putative Heat shock protein DnaJ, cysteine-rich OS=Rosa chinensis OX=74649 GN=RchiOBHm_Chr6g0298061 PE=4 SV=1	--	uncharacterized protein LOC105349893 [Fragaria vesca subsp. vesca]
							maker-Fvb2-1-snap-gene-192.66	19275641	19281029	-	--	Molecular Function: RNA binding (GO:0003723);; Molecular Function: RNA-directed 5'-3' RNA polymerase activity (GO:0003968);; Biological Process: gene silencing by RNA (GO:0031047);	K11699	RNA processing and modification	--	RNA-dependent RNA polymerase 6 OS=Arabidopsis thaliana OX=3702 GN=RDR6 PE=1 SV=1	RNA-dependent RNA polymerase OS=Rosa chinensis OX=74649 GN=RchiOBHm_Chr4g0412141 PE=3 SV=1	RNA processing and modification	RNA-dependent RNA polymerase 6 isoform X1 [Fragaria vesca subsp. vesca]
							maker-Fvb2-1-snap-gene-193.41	19297667	19302985	+	Replication, recombination and repair	Molecular Function: nucleic acid binding (GO:0003676);; Molecular Function: helicase activity (GO:0004386);; Molecular Function: ATP binding (GO:0005524);	K12812	RNA processing and modification	DEAD/DEAH box helicase	DEAD-box ATP-dependent RNA helicase 15 OS=Arabidopsis thaliana OX=3702 GN=RH15 PE=1 SV=3	DEAD/DEAH box RNA helicase family protein OS=Prunus dulcis OX=3755 GN=Prudu_004069 PE=4 SV=1	RNA processing and modification	DEAD-box ATP-dependent RNA helicase 56 isoform X2 [Fragaria vesca subsp. vesca]
							maker-Fvb2-1-snap-gene-193.43	19308831	19319315	+	Carbohydrate transport and metabolism	Molecular Function: polygalacturonase activity (GO:0004650);; Cellular Component: extracellular region (GO:0005576);; Biological Process: carbohydrate metabolic process (GO:0005975);; Biological Process: signal peptide processing (GO:0006465);; Molecular Function: peptidase activity (GO:0008233);; Cellular Component: integral component of membrane (GO:0016021);; Biological Process: cell wall orga…	K01184	--	Glycosyl hydrolases family 28	Probable polygalacturonase At3g15720 OS=Arabidopsis thaliana OX=3702 GN=At3g15720 PE=3 SV=1	Signal peptidase I OS=Mangifera indica OX=29780 GN=PG69-2 PE=3 SV=1	Carbohydrate transport and metabolism	Polygalacturonase adpg1 [Thalictrum thalictroides]
							snap_masked-Fvb2-1-processed-gene-192.35	19260034	19262829	+
							snap_masked-Fvb2-1-processed-gene-193.11	19287767	19290720	+	--	Biological Process: cellular response to phosphate starvation (GO:0016036);	K14430	Inorganic ion transport and metabolism	SPX domain	SPX domain-containing protein 2 OS=Arabidopsis thaliana OX=3702 GN=SPX2 PE=2 SV=1	Putative SPX domain-containing protein OS=Rosa chinensis OX=74649 GN=RchiOBHm_Chr6g0298031 PE=4 SV=1	Inorganic ion transport and metabolism	SPX domain-containing protein 1-like [Fragaria vesca subsp. vesca]
							snap_masked-Fvb2-1-processed-gene-193.12	19290946	19291905	+	Lipid transport and metabolism	Molecular Function: methyl indole-3-acetate esterase activity (GO:0080030);	K20506	Defense mechanisms	alpha/beta hydrolase fold	Probable carboxylesterase 6 OS=Arabidopsis thaliana OX=3702 GN=CXE6 PE=2 SV=1	Putative carboxylesterase OS=Rosa chinensis OX=74649 GN=RchiOBHm_Chr6g0298051 PE=4 SV=1	Defense mechanisms	probable carboxylesterase 6 [Fragaria vesca subsp. vesca]
							snap_masked-Fvb2-1-processed-gene-193.23	19321785	19322663	+	--	--	--	--	--	--	Uncharacterized protein OS=Rosa chinensis OX=74649 GN=RchiOBHm_Chr6g0298091 PE=4 SV=1	--	uncharacterized protein LOC101298393 [Fragaria vesca subsp. vesca]
							snap_masked-Fvb2-1-processed-gene-193.28	19344312	19344651	+
							snap_masked-Fvb2-1-processed-gene-193.29	19345951	19348392	+
Fvb2-3	3070001	3240000	169999	32	0.333974	3.00741
							augustus_masked-Fvb2-3-processed-gene-31.10	3099835	3105957	-	Carbohydrate transport and metabolism	Molecular Function: glucose-6-phosphate isomerase activity (GO:0004347);; Biological Process: gluconeogenesis (GO:0006094);; Biological Process: glycolytic process (GO:0006096);	K01810	Carbohydrate transport and metabolism	Phosphoglucose isomerase	Glucose-6-phosphate isomerase, cytosolic OS=Arabidopsis thaliana OX=3702 GN=PGIC PE=1 SV=1	Glucose-6-phosphate isomerase OS=Rosa chinensis OX=74649 GN=RchiOBHm_Chr6g0300881 PE=3 SV=1	Carbohydrate transport and metabolism	glucose-6-phosphate isomerase, cytosolic [Fragaria vesca subsp. vesca]
							augustus_masked-Fvb2-3-processed-gene-31.14	3130124	3132686	-	--	Molecular Function: pectinesterase activity (GO:0030599);; Biological Process: cell wall modification (GO:0042545);; Molecular Function: aspartyl esterase activity (GO:0045330);	K01051	--	Pectinesterase	Putative pectinesterase 11 OS=Arabidopsis thaliana OX=3702 GN=PME11 PE=3 SV=1	Pectinesterase OS=Rosa chinensis OX=74649 GN=RchiOBHm_Chr6g0301011 PE=4 SV=1	Carbohydrate transport and metabolism	putative pectinesterase 11 [Fragaria vesca subsp. vesca]
							augustus_masked-Fvb2-3-processed-gene-31.2	3107216	3108001	+	--	--	--	--	Protein of unknown function (DUF1635)	--	Uncharacterized protein OS=Rosa chinensis OX=74649 GN=RchiOBHm_Chr6g0300901 PE=4 SV=1	Function unknown	uncharacterized protein LOC105350171 [Fragaria vesca subsp. vesca]
							augustus_masked-Fvb2-3-processed-gene-31.9	3175805	3177346	+	Secondary metabolites biosynthesis, transport and catabolism	Biological Process: fatty acid biosynthetic process (GO:0006633);; Cellular Component: integral component of membrane (GO:0016021);; Molecular Function: transferase activity, transferring acyl groups other than amino-acyl groups (GO:0016747);	K15397	--	FAE1/Type III polyketide synthase-like protein	3-ketoacyl-CoA synthase 4 OS=Arabidopsis thaliana OX=3702 GN=KCS4 PE=2 SV=1	3-ketoacyl-CoA synthase OS=Rosa chinensis OX=74649 GN=RchiOBHm_Chr6g0301131 PE=3 SV=1	Lipid transport and metabolism	3-ketoacyl-CoA synthase 4 [Fragaria vesca subsp. vesca]
							augustus_masked-Fvb2-3-processed-gene-32.1	3192371	3194335	+	Secondary metabolites biosynthesis, transport and catabolism	Biological Process: lipid biosynthetic process (GO:0008610);; Molecular Function: ligase activity (GO:0016874);	K01904	Lipid transport and metabolism	AMP-binding enzyme	Probable 4-coumarate--CoA ligase 1 OS=Oryza sativa subsp. japonica OX=39947 GN=4CL1 PE=2 SV=2	Putative AMP-dependent synthetase/ligase OS=Rosa chinensis OX=74649 GN=RchiOBHm_Chr6g0301171 PE=4 SV=1	--	disco-interacting protein 2 homolog B-A-like [Fragaria vesca subsp. vesca]
							augustus_masked-Fvb2-3-processed-gene-32.16	3218918	3221575	-	--	Molecular Function: molecular_function (GO:0003674);; Molecular Function: DNA-binding transcription factor activity (GO:0003700);; Molecular Function: binding (GO:0005488);; Molecular Function: protein binding (GO:0005515);; Molecular Function: phospholipid binding (GO:0005543);; Biological Process: regulation of transcription, DNA-templated (GO:0006355);; Biological Process: multicellular organi…	K19600	General function prediction only	Tub family	Tubby-like F-box protein 5 OS=Oryza sativa subsp. japonica OX=39947 GN=TULP5 PE=2 SV=1	Tubby-like F-box protein OS=Prunus persica OX=3760 GN=PRUPE_1G377700 PE=3 SV=1	Function unknown	tubby-like F-box protein 2 [Fragaria vesca subsp. vesca]
							augustus_masked-Fvb2-3-processed-gene-32.3	3205803	3206528	+	Posttranslational modification, protein turnover, chaperones	Cellular Component: cytoplasm (GO:0005737);; Molecular Function: thioredoxin peroxidase activity (GO:0008379);; Biological Process: cellular response to oxidative stress (GO:0034599);; Biological Process: hydrogen peroxide catabolic process (GO:0042744);; Biological Process: cell redox homeostasis (GO:0045454);	K24140	Posttranslational modification, protein turnover, chaperones	Redoxin	Peroxiredoxin-2E-1, chloroplastic OS=Oryza sativa subsp. japonica OX=39947 GN=PRXIIE-1 PE=2 SV=1	Glutaredoxin-dependent peroxiredoxin OS=Prunus persica OX=3760 GN=PRUPE_1G378100 PE=3 SV=1	Posttranslational modification, protein turnover, chaperones	peroxiredoxin-2E-1, chloroplastic-like [Fragaria vesca subsp. vesca]
							augustus_masked-Fvb2-3-processed-gene-32.5	3216999	3218926	+	--	--	--	--	--	--	Uncharacterized protein OS=Rosa chinensis OX=74649 GN=RchiOBHm_Chr6g0301251 PE=4 SV=1	--	protein IWS1 homolog A [Fragaria vesca subsp. vesca]
							maker-Fvb2-3-augustus-gene-31.53	3123043	3126864	+	--	--	K14399	Lipid transport and metabolism	CRAL/TRIO domain	Phosphatidylinositol/phosphatidylcholine transfer protein SFH12 OS=Arabidopsis thaliana OX=3702 GN=SFH12 PE=2 SV=1	Putative CRAL-TRIO lipid binding domain, CRAL/TRIO domain-containing protein OS=Rosa chinensis OX=74649 GN=RchiOBHm_Chr6g0300991 PE=4 SV=1	Lipid transport and metabolism	random slug protein 5 [Fragaria vesca subsp. vesca]
							maker-Fvb2-3-augustus-gene-31.56	3169915	3172787	+	--	Molecular Function: nucleoside-triphosphate diphosphatase activity (GO:0047429);	K06287	Cell cycle control, cell division, chromosome partitioning	Maf-like protein	--	PREDICTED: maf OS=Prunus dulcis OX=3755 GN=ALMOND_2B015469 PE=3 SV=1	Cell cycle control, cell division, chromosome partitioning	maf-like protein DDB_G0281937 isoform X1 [Fragaria vesca subsp. vesca]
							maker-Fvb2-3-augustus-gene-31.57	3091076	3098855	-	--	Cellular Component: integral component of membrane (GO:0016021);	K18730	General function prediction only	GYF domain	Protein ESSENTIAL FOR POTEXVIRUS ACCUMULATION 1 OS=Arabidopsis thaliana OX=3702 GN=EXA1 PE=1 SV=1	Putative GYF domain-containing protein OS=Rosa chinensis OX=74649 GN=RchiOBHm_Chr6g0300861 PE=4 SV=1	Function unknown	uncharacterized protein LOC101308259 [Fragaria vesca subsp. vesca]
							maker-Fvb2-3-augustus-gene-31.62	3126065	3129649	-	--	Cellular Component: integral component of membrane (GO:0016021);	--	--	--	Uncharacterized protein At1g01500 OS=Arabidopsis thaliana OX=3702 GN=At1g01500 PE=2 SV=1	Uncharacterized protein OS=Rosa chinensis OX=74649 GN=RchiOBHm_Chr6g0301001 PE=4 SV=1	Function unknown	uncharacterized protein At1g01500 [Fragaria vesca subsp. vesca]
							maker-Fvb2-3-augustus-gene-31.64	3137181	3140571	-	Translation, ribosomal structure and biogenesis	Biological Process: tRNA processing (GO:0008033);; Molecular Function: FMN binding (GO:0010181);; Molecular Function: 4 iron, 4 sulfur cluster binding (GO:0051539);; Biological Process: oxidation-reduction process (GO:0055114);; Molecular Function: tRNA-4-demethylwyosine synthase activity (GO:0102521);	K15449	Energy production and conversion	Radical SAM superfamily	S-adenosyl-L-methionine-dependent tRNA 4-demethylwyosine synthase OS=Arabidopsis thaliana OX=3702 GN=TYW1 PE=2 SV=1	tRNA 4-demethylwyosine synthase (AdoMet-dependent) OS=Rosa chinensis OX=74649 GN=RchiOBHm_Chr6g0301031 PE=3 SV=1	Energy production and conversion	S-adenosyl-L-methionine-dependent tRNA 4-demethylwyosine synthase [Fragaria vesca subsp. vesca]
							maker-Fvb2-3-augustus-gene-31.65	3144107	3147570	-	--	Molecular Function: methyltransferase activity (GO:0008168);; Cellular Component: integral component of membrane (GO:0016021);; Biological Process: methylation (GO:0032259);	K15449	--	Putative S-adenosyl-L-methionine-dependent methyltransferase	Probable methyltransferase PMT28 OS=Arabidopsis thaliana OX=3702 GN=At1g19430 PE=2 SV=1	Methyltransferase OS=Rosa chinensis OX=74649 GN=RchiOBHm_Chr6g0301041 PE=3 SV=1	Function unknown	probable methyltransferase PMT28 [Fragaria vesca subsp. vesca]
							maker-Fvb2-3-augustus-gene-31.66	3156088	3161396	-	--	Molecular Function: protein kinase activity (GO:0004672);; Molecular Function: ATP binding (GO:0005524);; Cellular Component: integral component of membrane (GO:0016021);	K13416	--	Leucine rich repeat	Probable LRR receptor-like serine/threonine-protein kinase At2g16250 OS=Arabidopsis thaliana OX=3702 GN=At2g16250 PE=1 SV=1	Protein kinase domain-containing protein OS=Rosa chinensis OX=74649 GN=RchiOBHm_Chr6g0301101 PE=4 SV=1	Signal transduction mechanisms	probable LRR receptor-like serine/threonine-protein kinase At2g16250 [Fragaria vesca subsp. vesca]
							maker-Fvb2-3-augustus-gene-31.67	3179087	3185051	-	Carbohydrate transport and metabolism	Biological Process: carbohydrate transport (GO:0008643);; Cellular Component: integral component of membrane (GO:0016021);; Molecular Function: transmembrane transporter activity (GO:0022857);	K03444	General function prediction only	Sugar (and other) transporter	Sugar transporter ERD6-like 6 OS=Arabidopsis thaliana OX=3702 GN=At1g75220 PE=1 SV=1	Putative major facilitator, sugar transporter, major facilitator superfamily OS=Rosa chinensis OX=74649 GN=RchiOBHm_Chr6g0301141 PE=3 SV=1	Intracellular trafficking, secretion, and vesicular transport	sugar transporter ERD6-like 6 [Fragaria vesca subsp. vesca]	Yu et al., 2021
							maker-Fvb2-3-augustus-gene-32.54	3186597	3190860	+	Replication, recombination and repair	Biological Process: base-excision repair (GO:0006284);; Molecular Function: DNA-3-methyladenine glycosylase activity (GO:0008725);; Molecular Function: DNA-7-methylguanine glycosylase activity (GO:0043916);; Molecular Function: DNA-7-methyladenine glycosylase activity (GO:0052821);; Molecular Function: DNA-3-methylguanine glycosylase activity (GO:0052822);	K01247	Replication, recombination and repair	HhH-GPD superfamily base excision DNA repair protein	--	Putative DNA-3-methyladenine glycosylase II OS=Rosa chinensis OX=74649 GN=RchiOBHm_Chr6g0301151 PE=4 SV=1	Replication, recombination and repair	DNA-3-methyladenine glycosylase [Fragaria vesca subsp. vesca]
							maker-Fvb2-3-augustus-gene-32.55	3225522	3229397	+	--	--	--	--	--	--	Uncharacterized protein OS=Rosa chinensis OX=74649 GN=RchiOBHm_Chr6g0301271 PE=4 SV=1	--	uncharacterized protein LOC101296348 [Fragaria vesca subsp. vesca]
							maker-Fvb2-3-augustus-gene-32.57	3235503	3237996	+	--	--	K07466	--	Replication protein A OB domain	--	Putative replication protein A, OB OS=Rosa chinensis OX=74649 GN=RchiOBHm_Chr2g0150581 PE=4 SV=1	Replication, recombination and repair	uncharacterized protein LOC101313743 isoform X2 [Fragaria vesca subsp. vesca]
							maker-Fvb2-3-augustus-gene-32.63	3206748	3207322	-	--	--	--	--	--	--	Uncharacterized protein OS=Rosa chinensis OX=74649 GN=RchiOBHm_Chr6g0301201 PE=4 SV=1	--	hypothetical protein RchiOBHm_Chr6g0301201 [Rosa chinensis]
							maker-Fvb2-3-augustus-gene-32.64	3209339	3211313	-	--	Molecular Function: DNA binding (GO:0003677);	K15397	Posttranslational modification, protein turnover, chaperones	Myb-like DNA-binding domain	Protein RADIALIS-like 5 OS=Arabidopsis thaliana OX=3702 GN=RL5 PE=3 SV=1	Putative transcription factor MYB-HB-like family OS=Rosa chinensis OX=74649 GN=RchiOBHm_Chr6g0301221 PE=4 SV=1	Transcription	protein RADIALIS-like 5 [Fragaria vesca subsp. vesca]
							maker-Fvb2-3-augustus-gene-32.65	3215185	3216248	-	Signal transduction mechanisms	Molecular Function: molecular_function (GO:0003674);; Molecular Function: binding (GO:0005488);; Cellular Component: cellular_component (GO:0005575);; Cellular Component: intracellular (GO:0005622);; Cellular Component: obsolete cell (GO:0005623);; Cellular Component: cytoplasm (GO:0005737);; Cellular Component: mitochondrion (GO:0005739);; Biological Process: response to stress (GO:0006950);; Bi…	--	--	CBS domain	CBS domain-containing protein CBSX3, mitochondrial OS=Arabidopsis thaliana OX=3702 GN=CBSX3 PE=1 SV=1	Putative CBS domain-containing protein OS=Rosa chinensis OX=74649 GN=RchiOBHm_Chr6g0301241 PE=4 SV=1	Function unknown	CBS domain-containing protein CBSX3, mitochondrial [Fragaria vesca subsp. vesca]
							maker-Fvb2-3-snap-gene-31.68	3085226	3090952	+	--	Cellular Component: integral component of membrane (GO:0016021);	--	--	Protein of unknown function (DUF1195)	--	Uncharacterized protein OS=Rosa chinensis OX=74649 GN=RchiOBHm_Chr6g0300851 PE=4 SV=1	Function unknown	uncharacterized protein LOC101301938 [Fragaria vesca subsp. vesca]
							maker-Fvb2-3-snap-gene-31.71	3114296	3118989	+
							maker-Fvb2-3-snap-gene-31.74	3165965	3166792	+
							maker-Fvb2-3-snap-gene-31.75	3167861	3168706	+	--	Molecular Function: DNA binding (GO:0003677);; Cellular Component: nucleus (GO:0005634);	K15397	Posttranslational modification, protein turnover, chaperones	--	Protein RADIALIS-like 1 OS=Arabidopsis thaliana OX=3702 GN=RL1 PE=2 SV=1	Putative transcription factor MYB/SANT family OS=Rosa chinensis OX=74649 GN=RchiOBHm_Chr6g0301111 PE=4 SV=1	Transcription	protein RADIALIS-like 6 [Fragaria vesca subsp. vesca]
							maker-Fvb2-3-snap-gene-31.79	3108400	3112793	-	Function unknown	Molecular Function: hydrolase activity, hydrolyzing O-glycosyl compounds (GO:0004553);; Biological Process: carbohydrate metabolic process (GO:0005975);; Cellular Component: integral component of membrane (GO:0016021);	K19891	--	Glycosyl hydrolases family 17	Glucan endo-1,3-beta-glucosidase 7 OS=Arabidopsis thaliana OX=3702 GN=At4g34480 PE=1 SV=2	(1->3)-beta-glucan endohydrolase OS=Pyrus ussuriensis x Pyrus communis OX=2448454 GN=D8674_032868 PE=3 SV=1	Carbohydrate transport and metabolism	hypothetical protein D8674_032868 [Pyrus ussuriensis x Pyrus communis]
							snap_masked-Fvb2-3-processed-gene-31.24	3119476	3122027	+
							snap_masked-Fvb2-3-processed-gene-31.29	3134446	3135342	+	--	Molecular Function: DNA binding (GO:0003677);	--	--	AT hook motif	--	--	--	--
							snap_masked-Fvb2-3-processed-gene-31.32	3150681	3158150	+	Cell cycle control, cell division, chromosome partitioning	Molecular Function: 5'-nucleotidase activity (GO:0008253);; Molecular Function: metal ion binding (GO:0046872);	K01081	Nucleotide transport and metabolism	5' nucleotidase family	--	Putative 5'-nucleotidase OS=Rosa chinensis OX=74649 GN=RchiOBHm_Chr6g0301091 PE=3 SV=1	Nucleotide transport and metabolism	5'-nucleotidase domain-containing protein 4 isoform X1 [Fragaria vesca subsp. vesca]
							snap_masked-Fvb2-3-processed-gene-31.44	3114271	3119013	-	--	--	--	--	DUF761-associated sequence motif	--	VARLMGL domain-containing protein OS=Rosa chinensis OX=74649 GN=RchiOBHm_Chr5g0052261 PE=4 SV=1	--	uncharacterized protein LOC101301072 [Fragaria vesca subsp. vesca]
							snap_masked-Fvb2-3-processed-gene-32.28	3199845	3200885	+	--	Molecular Function: DNA binding (GO:0003677);	K15777	--	ZF-HD protein dimerisation region	Zinc-finger homeodomain protein 6 OS=Arabidopsis thaliana OX=3702 GN=ZHD6 PE=1 SV=1	Putative transcription factor ZF-HD family OS=Rosa chinensis OX=74649 GN=RchiOBHm_Chr6g0301181 PE=4 SV=1	Transcription	zinc-finger homeodomain protein 6 [Fragaria vesca subsp. vesca]
Fvb2-3	3310001	3460000	149999	22	0.33967	2.8104
							augustus_masked-Fvb2-3-processed-gene-33.4	3319389	3320273	+	--	Cellular Component: integral component of membrane (GO:0016021);	--	--	--	--	Uncharacterized protein OS=Rosa chinensis OX=74649 GN=RchiOBHm_Chr6g0301481 PE=4 SV=1	--	uncharacterized protein LOC105350169 [Fragaria vesca subsp. vesca]
							augustus_masked-Fvb2-3-processed-gene-33.5	3337840	3344062	+	--	Molecular Function: ATP binding (GO:0005524);; Molecular Function: inositol pentakisphosphate 2-kinase activity (GO:0035299);	K10572	Signal transduction mechanisms	Inositol-pentakisphosphate 2-kinase	Inositol-pentakisphosphate 2-kinase OS=Arabidopsis thaliana OX=3702 GN=IPK1 PE=1 SV=1	Inositol-pentakisphosphate 2-kinase OS=Rosa chinensis OX=74649 GN=RchiOBHm_Chr6g0301531 PE=4 SV=1	Signal transduction mechanisms	inositol-pentakisphosphate 2-kinase isoform X1 [Fragaria vesca subsp. vesca]
							augustus_masked-Fvb2-3-processed-gene-34.1	3444469	3444981	+	--	Molecular Function: DNA-binding transcription factor activity (GO:0003700);	K09060	--	bZIP transcription factor	bZIP transcription factor 44 OS=Arabidopsis thaliana OX=3702 GN=BZIP44 PE=1 SV=1	Putative transcription factor bZIP family OS=Rosa chinensis OX=74649 GN=RchiOBHm_Chr6g0301661 PE=4 SV=1	Transcription	ocs element-binding factor 1-like [Fragaria vesca subsp. vesca]
							augustus_masked-Fvb2-3-processed-gene-34.2	3451427	3452011	+	--	Cellular Component: transcription factor TFIIIB complex (GO:0000126);; Molecular Function: RNA polymerase III general transcription initiation factor activity (GO:0000995);; Biological Process: transcription preinitiation complex assembly (GO:0070897);	K15196	--	Brf1-like TBP-binding domain	--	BRF1 domain-containing protein OS=Malus baccata OX=106549 GN=C1H46_002380 PE=4 SV=1	Function unknown	pre-mRNA-splicing factor CWC22 homolog [Fragaria vesca subsp. vesca]
							maker-Fvb2-3-augustus-gene-33.36	3313171	3314256	+	Translation, ribosomal structure and biogenesis	Molecular Function: structural constituent of ribosome (GO:0003735);; Cellular Component: ribosome (GO:0005840);; Biological Process: translation (GO:0006412);	K02909	--	Ribosomal protein L31	50S ribosomal protein L31, chloroplastic OS=Arabidopsis thaliana OX=3702 GN=RPL31 PE=2 SV=1	50S ribosomal protein L31 OS=Rosa chinensis OX=74649 GN=RchiOBHm_Chr6g0301461 PE=3 SV=1	Translation, ribosomal structure and biogenesis	50S ribosomal protein L31, chloroplastic isoform X2 [Fragaria vesca subsp. vesca]
							maker-Fvb2-3-augustus-gene-33.38	3349575	3352447	+	--	Molecular Function: ATP binding (GO:0005524);	K08900	Posttranslational modification, protein turnover, chaperones	Domain associated at C-terminal with AAA	Protein HYPER-SENSITIVITY-RELATED 4 OS=Arabidopsis thaliana OX=3702 GN=HSR4 PE=2 SV=1	Adenosinetriphosphatase OS=Rosa chinensis OX=74649 GN=RchiOBHm_Chr6g0301551 PE=3 SV=1	Posttranslational modification, protein turnover, chaperones	probable mitochondrial chaperone BCS1-A [Fragaria vesca subsp. vesca]
							maker-Fvb2-3-augustus-gene-33.42	3314520	3314920	-	--	Biological Process: defense response (GO:0006952);	K20727	--	Gamma-thionin family	Defensin-like protein 19 OS=Arabidopsis thaliana OX=3702 GN=PDF1.4 PE=3 SV=2	Putative defensin, plant OS=Rosa chinensis OX=74649 GN=RchiOBHm_Chr6g0301471 PE=4 SV=1	Signal transduction mechanisms	defensin-like protein 19 [Fragaria vesca subsp. vesca]
							maker-Fvb2-3-augustus-gene-33.46	3356131	3359791	-	General function prediction only	Molecular Function: nuclease activity (GO:0004518);	K08999	--	Domain of unknown function (DUF151)	Bifunctional nuclease 1 OS=Arabidopsis thaliana OX=3702 GN=BBD1 PE=2 SV=1	Putative bifunctional nuclease domain-containing protein OS=Rosa chinensis OX=74649 GN=RchiOBHm_Chr6g0301571 PE=3 SV=1	Function unknown	bifunctional nuclease 1 [Fragaria vesca subsp. vesca]
							maker-Fvb2-3-augustus-gene-34.34	3434322	3437251	+	Posttranslational modification, protein turnover, chaperones	Molecular Function: MAP kinase activity (GO:0004707);; Molecular Function: ATP binding (GO:0005524);	K20535	Signal transduction mechanisms	Protein kinase domain	Mitogen-activated protein kinase homolog NTF3 OS=Nicotiana tabacum OX=4097 GN=NTF3 PE=1 SV=1	Mitogen-activated protein kinase OS=Rosa chinensis OX=74649 GN=RchiOBHm_Chr6g0301651 PE=3 SV=1	Signal transduction mechanisms	mitogen-activated protein kinase homolog NTF3 [Fragaria vesca subsp. vesca]
							maker-Fvb2-3-augustus-gene-34.39	3424238	3427505	-	--	Molecular Function: omega-hydroxypalmitate O-sinapoyl transferase activity (GO:0102406);	K15400	--	Transferase family	Fatty alcohol:caffeoyl-CoA acyltransferase OS=Arabidopsis thaliana OX=3702 GN=FACT PE=2 SV=1	Putative omega-hydroxypalmitate O-feruloyl transferase OS=Rosa chinensis OX=74649 GN=RchiOBHm_Chr6g0301621 PE=3 SV=1	Function unknown	omega-hydroxypalmitate O-feruloyl transferase [Fragaria vesca subsp. vesca]
							maker-Fvb2-3-augustus-gene-34.40	3429944	3434502	-	--	Biological Process: intracellular protein transport (GO:0006886);; Biological Process: vesicle-mediated transport (GO:0016192);; Cellular Component: clathrin adaptor complex (GO:0030131);	K12402	Intracellular trafficking, secretion, and vesicular transport	Adaptor complexes medium subunit family	AP-4 complex subunit mu OS=Arabidopsis thaliana OX=3702 GN=AP4M PE=2 SV=1	Putative clathrin adaptor, mu subunit OS=Rosa chinensis OX=74649 GN=RchiOBHm_Chr6g0301631 PE=3 SV=1	Intracellular trafficking, secretion, and vesicular transport	AP-4 complex subunit mu-like isoform X1 [Fragaria vesca subsp. vesca]
							maker-Fvb2-3-augustus-gene-34.41	3449384	3451346	-	--	Cellular Component: integral component of membrane (GO:0016021);; Cellular Component: chloroplast membrane (GO:0031969);	--	--	Chloroplast import apparatus Tic20-like	Protein TIC 20-I, chloroplastic OS=Arabidopsis thaliana OX=3702 GN=TIC20-I PE=1 SV=1	Protein TIC 20 OS=Rosa chinensis OX=74649 GN=RchiOBHm_Chr6g0301671 PE=3 SV=1	Function unknown	protein TIC 20-I, chloroplastic [Fragaria vesca subsp. vesca]
							maker-Fvb2-3-augustus-gene-34.43	3452032	3454314	-	Cell wall/membrane/envelope biogenesis	Molecular Function: catalytic activity (GO:0003824);	--	Carbohydrate transport and metabolism	--	--	Putative NAD(P)-binding domain-containing protein OS=Rosa chinensis OX=74649 GN=RchiOBHm_Chr6g0301681 PE=4 SV=1	Carbohydrate transport and metabolism	uncharacterized protein LOC101313573 [Fragaria vesca subsp. vesca]
							maker-Fvb2-3-augustus-gene-34.44	3456141	3459588	-	Cell wall/membrane/envelope biogenesis	Molecular Function: trehalose synthase activity (GO:0102986);	--	Cell wall/membrane/envelope biogenesis	Glycosyl-transferase family 4	--	Putative alpha,alpha-trehalose synthase OS=Rosa chinensis OX=74649 GN=RchiOBHm_Chr6g0301701 PE=4 SV=1	Cell wall/membrane/envelope biogenesis	uncharacterized protein LOC101312987 [Fragaria vesca subsp. vesca]
							maker-Fvb2-3-snap-gene-33.57	3307003	3312046	-	Carbohydrate transport and metabolism	Molecular Function: ATP binding (GO:0005524);; Biological Process: glycogen biosynthetic process (GO:0005978);; Molecular Function: glucose-1-phosphate adenylyltransferase activity (GO:0008878);; Cellular Component: chloroplast (GO:0009507);; Biological Process: starch biosynthetic process (GO:0019252);	K00975	Cell wall/membrane/envelope biogenesis	Nucleotidyl transferase	Glucose-1-phosphate adenylyltransferase large subunit, chloroplastic/amyloplastic OS=Beta vulgaris OX=161934 GN=AGPS1 PE=2 SV=1	Glucose-1-phosphate adenylyltransferase OS=Rosa chinensis OX=74649 GN=RchiOBHm_Chr6g0301451 PE=3 SV=1	Cell wall/membrane/envelope biogenesis	glucose-1-phosphate adenylyltransferase large subunit 1-like [Fragaria vesca subsp. vesca]
							maker-Fvb2-3-snap-gene-33.59	3328115	3333937	-	Lipid transport and metabolism	Molecular Function: molecular_function (GO:0003674);; Molecular Function: catalytic activity (GO:0003824);; Cellular Component: cellular_component (GO:0005575);; Cellular Component: intracellular (GO:0005622);; Cellular Component: obsolete cell (GO:0005623);; Cellular Component: cytoplasm (GO:0005737);; Biological Process: organic acid metabolic process (GO:0006082);; Biological Process: response…	K08241	--	SAM dependent carboxyl methyltransferase	Jasmonate O-methyltransferase OS=Brassica rapa subsp. pekinensis OX=51351 GN=JMT PE=1 SV=1	SAM dependent carboxyl methyltransferase OS=Cynara cardunculus var. scolymus OX=59895 GN=Ccrd_023333 PE=3 SV=1	Function unknown	jasmonate O-methyltransferase-like [Fragaria vesca subsp. vesca]
							maker-Fvb2-3-snap-gene-33.60	3326196	3327128	-	--	Molecular Function: iron ion binding (GO:0005506);; Cellular Component: integral component of membrane (GO:0016021);; Molecular Function: heme binding (GO:0020037);; Molecular Function: (22S)-22-hydroxy-5alpha-campestan-3-one C-23 hydroxylase activity (GO:0102097);	K07437	--	Cytochrome P450	Abscisic acid 8'-hydroxylase 2 OS=Oryza sativa subsp. indica OX=39946 GN=CYP707A6 PE=2 SV=1	Putative 3-epi-6-deoxocathasterone 23-monooxygenase OS=Rosa chinensis OX=74649 GN=RchiOBHm_Chr6g0301491 PE=3 SV=1	Secondary metabolites biosynthesis, transport and catabolism	abscisic acid 8'-hydroxylase 1 isoform X1 [Fragaria vesca subsp. vesca]
							maker-Fvb2-3-snap-gene-33.61	3327153	3327972	-	--	Molecular Function: iron ion binding (GO:0005506);; Cellular Component: integral component of membrane (GO:0016021);; Molecular Function: heme binding (GO:0020037);; Molecular Function: (22S)-22-hydroxy-5alpha-campestan-3-one C-23 hydroxylase activity (GO:0102097);	K07437	--	--	Cytochrome P450 720B2 OS=Pinus taeda OX=3352 GN=CYP720B2 PE=2 SV=1	Putative 3-epi-6-deoxocathasterone 23-monooxygenase OS=Rosa chinensis OX=74649 GN=RchiOBHm_Chr6g0301491 PE=3 SV=1	Secondary metabolites biosynthesis, transport and catabolism	abscisic acid 8'-hydroxylase 1 isoform X1 [Fragaria vesca subsp. vesca]
							maker-Fvb2-3-snap-gene-33.62	3351271	3355641	-	--	Biological Process: reproduction (GO:0000003);; Biological Process: microtubule cytoskeleton organization (GO:0000226);; Biological Process: developmental process involved in reproduction (GO:0003006);; Molecular Function: molecular_function (GO:0003674);; Molecular Function: transporter activity (GO:0005215);; Molecular Function: lipid transporter activity (GO:0005319);; Molecular Function: phos…	K02433	Lipid transport and metabolism	CRAL/TRIO domain	Phosphatidylinositol/phosphatidylcholine transfer protein SFH8 OS=Arabidopsis thaliana OX=3702 GN=SFH8 PE=2 SV=1	Putative cellular retinaldehyde binding/alpha-tocopherol transport, CRAL/TRIO OS=Rosa chinensis OX=74649 GN=RchiOBHm_Chr6g0301561 PE=4 SV=1	Lipid transport and metabolism	phosphatidylinositol/phosphatidylcholine transfer protein SFH8 [Fragaria vesca subsp. vesca]
							maker-Fvb2-3-snap-gene-33.64	3367483	3371456	-	--	Molecular Function: protein dimerization activity (GO:0046983);	K05765	--	--	Transcription factor bHLH110 OS=Arabidopsis thaliana OX=3702 GN=BHLH110 PE=2 SV=2	Putative transcription factor bHLH family OS=Rosa chinensis OX=74649 GN=RchiOBHm_Chr6g0301601 PE=4 SV=1	Transcription	transcription factor bHLH110 [Fragaria vesca subsp. vesca]
							maker-Fvb2-3-snap-gene-34.50	3455403	3457059	+	--	Cellular Component: integral component of membrane (GO:0016021);	--	Function unknown	TLC domain	--	Putative TRAM/LAG1/CLN8 domain-containing protein OS=Rosa chinensis OX=74649 GN=RchiOBHm_Chr6g0301691 PE=4 SV=1	Function unknown	transmembrane protein 136 [Fragaria vesca subsp. vesca]
							maker-Fvb2-3-snap-gene-34.54	3416826	3421001	-
Fvb2-3	6950001	7070000	119999	21	0.297813	2.1183
							augustus_masked-Fvb2-3-processed-gene-69.8	6977735	6977974	+	--	--	--	--	Domain of unknown function (DUF2828)	--	Uncharacterized protein OS=Rosa chinensis OX=74649 GN=RchiOBHm_Chr2g0136111 PE=4 SV=1	Function unknown	uncharacterized protein LOC112189781 [Rosa chinensis]
							augustus_masked-Fvb2-3-processed-gene-70.14	7018216	7018776	-	--	--	--	--	--	--	Uncharacterized protein OS=Rosa chinensis OX=74649 GN=RchiOBHm_Chr6g0310921 PE=4 SV=1	--	hypothetical protein RchiOBHm_Chr6g0310921 [Rosa chinensis]
							augustus_masked-Fvb2-3-processed-gene-70.16	7043471	7044823	-	Lipid transport and metabolism	Biological Process: lipid metabolic process (GO:0006629);; Cellular Component: integral component of membrane (GO:0016021);; Molecular Function: oxidoreductase activity (GO:0016491);	K21737	Lipid transport and metabolism	Fatty acid desaturase	Acyl-lipid (9-3)-desaturase OS=Borago officinalis OX=13363 PE=1 SV=1	Putative oxidoreductase OS=Rosa chinensis OX=74649 GN=RchiOBHm_Chr6g0311061 PE=4 SV=1	Lipid transport and metabolism	delta(8)-fatty-acid desaturase 1-like [Fragaria vesca subsp. vesca]
							augustus_masked-Fvb2-3-processed-gene-70.4	7025783	7026703	+	--	Cellular Component: integral component of membrane (GO:0016021);	K07441	--	Cotton fibre expressed protein	Pathogen-associated molecular patterns-induced protein A70 OS=Arabidopsis thaliana OX=3702 GN=A70 PE=1 SV=1	DUF4408 domain-containing protein OS=Rosa chinensis OX=74649 GN=RchiOBHm_Chr6g0310991 PE=4 SV=1	Function unknown	uncharacterized protein LOC101310484 [Fragaria vesca subsp. vesca]
							augustus_masked-Fvb2-3-processed-gene-70.5	7028503	7031221	+	--	Cellular Component: integral component of membrane (GO:0016021);	--	--	--	--	Putative ceramidase OS=Rosa chinensis OX=74649 GN=RchiOBHm_Chr6g0311011 PE=4 SV=1	--	uncharacterized protein LOC101307374 isoform X2 [Fragaria vesca subsp. vesca]
							augustus_masked-Fvb2-3-processed-gene-70.6	7033525	7034310	+	--	Cellular Component: integral component of membrane (GO:0016021);	K04077	--	Late embryogenesis abundant protein	--	Putative Late embryogenesis abundant protein, LEA-14 OS=Rosa chinensis OX=74649 GN=RchiOBHm_Chr6g0311021 PE=4 SV=1	--	uncharacterized protein LOC101307667 [Fragaria vesca subsp. vesca]
							augustus_masked-Fvb2-3-processed-gene-70.7	7036875	7038833	+	Signal transduction mechanisms	Molecular Function: protein kinase activity (GO:0004672);; Molecular Function: ATP binding (GO:0005524);; Cellular Component: integral component of membrane (GO:0016021);	K13415	--	Protein kinase domain	Leucine-rich repeat receptor-like protein kinase PXC1 OS=Arabidopsis thaliana OX=3702 GN=PXC1 PE=1 SV=1	Protein kinase domain-containing protein OS=Rosa chinensis OX=74649 GN=RchiOBHm_Chr6g0311031 PE=4 SV=1	Signal transduction mechanisms	probable leucine-rich repeat receptor-like protein kinase At1g68400 [Fragaria vesca subsp. vesca]
							maker-Fvb2-3-augustus-gene-69.41	6954179	6955266	+	--	--	K08869	--	Myb-like DNA-binding domain	Transcription factor KUA1 OS=Arabidopsis thaliana OX=3702 GN=KUA1 PE=1 SV=1	Uncharacterized protein (Fragment) OS=Rhododendron williamsianum OX=262921 GN=C3L33_19331 PE=4 SV=1	Transcription	myb-like protein J [Fragaria vesca subsp. vesca]
							maker-Fvb2-3-augustus-gene-69.51	6965530	6969313	-	--	Molecular Function: NAD-dependent histone deacetylase activity (H3-K14 specific) (GO:0032041);	K11418	Chromatin structure and dynamics	Histone deacetylase domain	Histone deacetylase 2 OS=Arabidopsis thaliana OX=3702 GN=HDA2 PE=2 SV=2	Histone deacetylase OS=Rosa chinensis OX=74649 GN=RchiOBHm_Chr6g0310741 PE=4 SV=1	Chromatin structure and dynamics	histone deacetylase 2 isoform X1 [Fragaria vesca subsp. vesca]
							maker-Fvb2-3-augustus-gene-69.52	6976440	6976934	-	--	Molecular Function: ligand-gated ion channel activity (GO:0015276);; Cellular Component: integral component of membrane (GO:0016021);	K05387	--	--	--	Glutamate receptor OS=Pyrus ussuriensis x Pyrus communis OX=2448454 GN=D8674_015430 PE=3 SV=1	--	glutamate receptor 2.8-like [Fragaria vesca subsp. vesca]
							maker-Fvb2-3-augustus-gene-69.53	6979048	6983362	-	--	Molecular Function: ligand-gated ion channel activity (GO:0015276);; Cellular Component: integral component of membrane (GO:0016021);	K05387	--	Receptor family ligand binding region	Glutamate receptor 2.8 OS=Arabidopsis thaliana OX=3702 GN=GLR2.8 PE=2 SV=2	Glutamate receptor OS=Prunus yedoensis var. nudiflora OX=2094558 GN=Pyn_20340 PE=3 SV=1	--	glutamate receptor 2.7-like isoform X1 [Fragaria vesca subsp. vesca]
							maker-Fvb2-3-augustus-gene-70.43	7039665	7042600	+	--	--	--	--	Lateral organ boundaries (LOB) domain	--	Putative transcription factor AS2-LOB family OS=Rosa chinensis OX=74649 GN=RchiOBHm_Chr6g0311051 PE=3 SV=1	--	LOB domain-containing protein 22-like isoform X1 [Fragaria vesca subsp. vesca]
							maker-Fvb2-3-augustus-gene-70.44	7069142	7072049	+	Cell wall/membrane/envelope biogenesis	Molecular Function: UDPsulfoquinovose synthase activity (GO:0046507);	K06118	Cell wall/membrane/envelope biogenesis	NAD dependent epimerase/dehydratase family	UDP-sulfoquinovose synthase, chloroplastic OS=Arabidopsis thaliana OX=3702 GN=SQD1 PE=1 SV=1	Putative UDP-sulfoquinovose synthase OS=Rosa chinensis OX=74649 GN=RchiOBHm_Chr6g0311071 PE=4 SV=1	Cell wall/membrane/envelope biogenesis	UDP-sulfoquinovose synthase, chloroplastic [Fragaria vesca subsp. vesca]
							maker-Fvb2-3-augustus-gene-70.46	6990986	6992910	-	--	Cellular Component: integral component of membrane (GO:0016021);	K20726	Function unknown	Protein of unknown function (DUF778)	Protein REVERSION-TO-ETHYLENE SENSITIVITY1 OS=Arabidopsis thaliana OX=3702 GN=RTE1 PE=1 SV=1	Uncharacterized protein OS=Rosa chinensis OX=74649 GN=RchiOBHm_Chr6g0310861 PE=4 SV=1	Function unknown	protein REVERSION-TO-ETHYLENE SENSITIVITY1 [Fragaria vesca subsp. vesca]
							maker-Fvb2-3-augustus-gene-70.49	7003342	7009163	-	Amino acid transport and metabolism	Molecular Function: glycine dehydrogenase (decarboxylating) activity (GO:0004375);; Cellular Component: mitochondrion (GO:0005739);; Biological Process: glycine catabolic process (GO:0006546);	K00281	Amino acid transport and metabolism	Glycine cleavage system P-protein	Glycine dehydrogenase (decarboxylating), mitochondrial OS=Solanum tuberosum OX=4113 GN=GDCSP PE=2 SV=1	Glycine cleavage system P protein OS=Rosa chinensis OX=74649 GN=RchiOBHm_Chr6g0310901 PE=3 SV=1	Amino acid transport and metabolism	glycine dehydrogenase (decarboxylating), mitochondrial [Fragaria vesca subsp. vesca]
							maker-Fvb2-3-augustus-gene-70.50	7010511	7012253	-	--	Biological Process: regulation of transcription, DNA-templated (GO:0006355);; Molecular Function: zinc ion binding (GO:0008270);; Molecular Function: sequence-specific DNA binding (GO:0043565);	--	--	--	--	Putative transcription factor C2C2-GATA family OS=Rosa chinensis OX=74649 GN=RchiOBHm_Chr6g0310911 PE=4 SV=1	Transcription	putative GATA transcription factor 22 [Fragaria vesca subsp. vesca]
							maker-Fvb2-3-augustus-gene-70.51	7019305	7022756	-	--	Cellular Component: Golgi membrane (GO:0000139);; Biological Process: protein glycosylation (GO:0006486);; Cellular Component: integral component of membrane (GO:0016021);; Molecular Function: transferase activity, transferring glycosyl groups (GO:0016757);	K20855	Carbohydrate transport and metabolism	Galactosyltransferase	Probable beta-1,3-galactosyltransferase 12 OS=Arabidopsis thaliana OX=3702 GN=B3GALT12 PE=2 SV=1	Hexosyltransferase OS=Rosa chinensis OX=74649 GN=RchiOBHm_Chr6g0310931 PE=3 SV=1	Carbohydrate transport and metabolism	probable beta-1,3-galactosyltransferase 12 [Fragaria vesca subsp. vesca]
							maker-Fvb2-3-snap-gene-69.60	6972109	6974477	+	--	Molecular Function: calcium ion binding (GO:0005509);; Cellular Component: integral component of membrane (GO:0016021);	K06268	Signal transduction mechanisms	EF hand	Calcineurin B-like protein 10 OS=Arabidopsis thaliana OX=3702 GN=CBL10 PE=1 SV=1	Putative EF-hand domain pair protein OS=Rosa chinensis OX=74649 GN=RchiOBHm_Chr6g0310771 PE=4 SV=1	Signal transduction mechanisms	calcineurin B-like protein 10 [Fragaria vesca subsp. vesca]
							maker-Fvb2-3-snap-gene-69.67	6956516	6964967	-	Inorganic ion transport and metabolism	Molecular Function: solute:proton antiporter activity (GO:0015299);; Cellular Component: integral component of membrane (GO:0016021);	--	Inorganic ion transport and metabolism	Sodium/hydrogen exchanger family	K(+) efflux antiporter 6 OS=Arabidopsis thaliana OX=3702 GN=KEA6 PE=2 SV=1	Putative cation/H+ exchanger OS=Rosa chinensis OX=74649 GN=RchiOBHm_Chr6g0310731 PE=4 SV=1	Inorganic ion transport and metabolism	K(+) efflux antiporter 6 [Fragaria vesca subsp. vesca]
							maker-Fvb2-3-snap-gene-70.63	6994179	7001584	-	--	Cellular Component: integral component of membrane (GO:0016021);	--	--	Conserved in the green lineage and diatoms 27	Uncharacterized protein ycf36 OS=Cyanophora paradoxa OX=2762 GN=ycf36 PE=3 SV=1	Uncharacterized protein OS=Rosa chinensis OX=74649 GN=RchiOBHm_Chr6g0310871 PE=4 SV=1	Function unknown	uncharacterized protein ycf36 [Fragaria vesca subsp. vesca]
							snap_masked-Fvb2-3-processed-gene-70.19	6987195	6990768	+	--	--	--	--	--	--	Uncharacterized protein OS=Rosa chinensis OX=74649 GN=RchiOBHm_Chr6g0290791 PE=4 SV=1	--	uncharacterized protein LOC101307554 [Fragaria vesca subsp. vesca]
Fvb2-4	290001	410000	119999	9	0.283503	3.41012
							augustus_masked-Fvb2-4-processed-gene-4.0	397629	401192	+	--	Cellular Component: proteasome complex (GO:0000502);	K03029	Posttranslational modification, protein turnover, chaperones	von Willebrand factor type A domain	26S proteasome non-ATPase regulatory subunit 4 homolog OS=Oryza sativa subsp. japonica OX=39947 GN=RPN10 PE=1 SV=1	Putative 26S proteasome regulatory complex, non-ATPase subcomplex, subunit s5a OS=Rosa chinensis OX=74649 GN=RchiOBHm_Chr6g0244071 PE=3 SV=1	Posttranslational modification, protein turnover, chaperones	26S proteasome non-ATPase regulatory subunit 4 homolog [Fragaria vesca subsp. vesca]
							augustus_masked-Fvb2-4-processed-gene-4.9	405909	406901	-	--	Molecular Function: RNA binding (GO:0003723);; Molecular Function: mRNA (guanine-N7-)-methyltransferase activity (GO:0004482);; Cellular Component: nucleus (GO:0005634);; Cellular Component: host cell nucleus (GO:0042025);	K00565	RNA processing and modification	mRNA capping enzyme	mRNA cap guanine-N7 methyltransferase 1 OS=Arabidopsis thaliana OX=3702 GN=At3g20650 PE=2 SV=1	mRNA cap guanine-N7 methyltransferase OS=Rosa chinensis OX=74649 GN=RchiOBHm_Chr5g0036961 PE=3 SV=1	RNA processing and modification	mRNA cap guanine-N7 methyltransferase 1 [Rosa chinensis]
							maker-Fvb2-4-augustus-gene-3.19	364354	369392	+	Inorganic ion transport and metabolism	Molecular Function: peroxidase activity (GO:0004601);; Biological Process: response to oxidative stress (GO:0006979);; Cellular Component: integral component of membrane (GO:0016021);; Molecular Function: heme binding (GO:0020037);	K00434	--	Peroxidase	L-ascorbate peroxidase 3 OS=Arabidopsis thaliana OX=3702 GN=APX3 PE=1 SV=1	L-ascorbate peroxidase OS=Rosa hybrid cultivar OX=128735 GN=APX3 PE=2 SV=1	Amino acid transport and metabolism	L-ascorbate peroxidase 3, peroxisomal [Fragaria vesca subsp. vesca]
							maker-Fvb2-4-augustus-gene-3.20	370940	372584	+	--	Molecular Function: DNA binding (GO:0003677);; Cellular Component: nucleus (GO:0005634);	K09422	Transcription	Myb-like DNA-binding domain	Myb-related protein 308 OS=Antirrhinum majus OX=4151 GN=MYB308 PE=2 SV=1	R2R3-MYB OS=Rosa hybrid cultivar OX=128735 GN=MYBs4-1 PE=4 SV=1	--	myb-related protein 308 [Fragaria vesca subsp. vesca]
							maker-Fvb2-4-augustus-gene-3.21	293443	295809	-	Secondary metabolites biosynthesis, transport and catabolism	Molecular Function: oxidoreductase activity (GO:0016491);	K22374	General function prediction only	Aldo/keto reductase family	Non-functional NADPH-dependent codeinone reductase 2 OS=Papaver somniferum OX=3469 GN=COR2 PE=1 SV=1	Aldo/keto reductase OS=Fragaria ananassa OX=3747 GN=AKR PE=2 SV=1	Function unknown	aldo/keto reductase [Fragaria x ananassa]
							maker-Fvb2-4-augustus-gene-3.22	315582	325357	-	--	Molecular Function: ubiquitin activating enzyme activity (GO:0004839);; Molecular Function: ubiquitin-protein transferase activity (GO:0004842);; Molecular Function: transferase activity, transferring acyl groups (GO:0016746);	K10590	Posttranslational modification, protein turnover, chaperones	HECT-domain (ubiquitin-transferase)	E3 ubiquitin-protein ligase UPL3 OS=Arabidopsis thaliana OX=3702 GN=UPL3 PE=1 SV=1	Putative aminoacyltransferase, E1 ubiquitin-activating enzyme OS=Rosa chinensis OX=74649 GN=RchiOBHm_Chr6g0251951 PE=4 SV=1	Posttranslational modification, protein turnover, chaperones	E3 ubiquitin-protein ligase UPL3 [Fragaria vesca subsp. vesca]
							maker-Fvb2-4-augustus-gene-4.42	388930	396766	-	--	Biological Process: mRNA splicing, via spliceosome (GO:0000398);	K11984	RNA processing and modification	SART-1 family	SART-1 family protein DOT2 OS=Arabidopsis thaliana OX=3702 GN=DOT2 PE=1 SV=1	Putative SNU66/SART1 family protein OS=Rosa chinensis OX=74649 GN=RchiOBHm_Chr4g0416151 PE=3 SV=1	RNA processing and modification	SART-1 family protein DOT2 [Fragaria vesca subsp. vesca]
							snap_masked-Fvb2-4-processed-gene-3.6	291895	294180	+	--	Molecular Function: beta-galactosidase activity (GO:0004565);; Biological Process: carbohydrate metabolic process (GO:0005975);; Molecular Function: carbohydrate binding (GO:0030246);	K12309	Carbohydrate transport and metabolism	Galactose binding lectin domain	Beta-galactosidase 13 OS=Arabidopsis thaliana OX=3702 GN=BGAL13 PE=2 SV=1	Beta-galactosidase OS=Rosa chinensis OX=74649 GN=RchiOBHm_Chr6g0251931 PE=3 SV=1	Carbohydrate transport and metabolism	beta-galactosidase 13-like [Fragaria vesca subsp. vesca]
							snap_masked-Fvb2-4-processed-gene-4.19	403541	404870	+	--	Molecular Function: actin binding (GO:0003779);; Cellular Component: actin cytoskeleton (GO:0015629);; Biological Process: actin filament depolymerization (GO:0030042);	K05765	Cytoskeleton	Cofilin/tropomyosin-type actin-binding protein	Actin-depolymerizing factor 5 OS=Arabidopsis thaliana OX=3702 GN=ADF5 PE=1 SV=1	Putative ADF/Cofilin, ADF-H/Gelsolin-like domain-containing protein OS=Rosa chinensis OX=74649 GN=RchiOBHm_Chr6g0244061 PE=3 SV=1	Cytoskeleton	actin-depolymerizing factor 5 [Fragaria vesca subsp. vesca]
Fvb2-4	5120001	5260000	139999	16	0.355164	3.3226
							augustus_masked-Fvb2-4-processed-gene-51.7	5168840	5170210	+	Translation, ribosomal structure and biogenesis	Molecular Function: GTPase activity (GO:0003924);; Molecular Function: GTP binding (GO:0005525);	K03242	Translation, ribosomal structure and biogenesis	Initiation factor eIF2 gamma, C terminal	--	Protein-synthesizing GTPase OS=Rosa chinensis OX=74649 GN=RchiOBHm_Chr3g0454951 PE=4 SV=1	Translation, ribosomal structure and biogenesis	eukaryotic translation initiation factor 2 subunit gamma-like [Rosa chinensis]
							augustus_masked-Fvb2-4-processed-gene-52.1	5194768	5195337	-	--	Molecular Function: molecular_function (GO:0003674);; Molecular Function: nucleic acid binding (GO:0003676);; Molecular Function: RNA binding (GO:0003723);; Molecular Function: catalytic activity (GO:0003824);; Molecular Function: nuclease activity (GO:0004518);; Molecular Function: endonuclease activity (GO:0004519);; Molecular Function: binding (GO:0005488);; Cellular Component: cellular_compon…	K03798	General function prediction only	PPR repeat	Pentatricopeptide repeat-containing protein At1g62260, mitochondrial OS=Arabidopsis thaliana OX=3702 GN=PCMP-E10 PE=2 SV=1	Putative tetratricopeptide-like helical domain-containing protein OS=Rosa chinensis OX=74649 GN=RchiOBHm_Chr6g0279101 PE=4 SV=1	Function unknown	pentatricopeptide repeat-containing protein At1g62260, mitochondrial [Fragaria vesca subsp. vesca]
							augustus_masked-Fvb2-4-processed-gene-52.2	5195450	5199372	-	--	Molecular Function: DNA binding (GO:0003677);; Cellular Component: nucleus (GO:0005634);	--	--	B3 DNA binding domain	B3 domain-containing protein At5g57720 OS=Arabidopsis thaliana OX=3702 GN=At5g57720 PE=2 SV=1	Putative transcription factor B3-Domain family OS=Rosa chinensis OX=74649 GN=RchiOBHm_Chr6g0259791 PE=4 SV=1	--	putative B3 domain-containing protein Os03g0621600 isoform X1 [Fragaria vesca subsp. vesca]
							augustus_masked-Fvb2-4-processed-gene-52.5	5246082	5246504	+	--	--	--	--	--	--	Putative transposase, Ptta/En/Spm, plant OS=Rosa chinensis OX=74649 GN=RchiOBHm_Chr1g0329081 PE=4 SV=1	Function unknown	uncharacterized protein LOC112186398 isoform X1 [Rosa chinensis]
							maker-Fvb2-4-augustus-gene-51.32	5146512	5149620	-	--	Cellular Component: cytochrome b6f complex (GO:0009512);	--	--	PetM family of cytochrome b6f complex subunit 7	Cytochrome b6-f complex subunit 7 (Fragment) OS=Spinacia oleracea OX=3562 GN=petM PE=1 SV=1	Putative PetM of cytochrome b6/f complex subunit 7 OS=Rosa chinensis OX=74649 GN=RchiOBHm_Chr3g0487591 PE=3 SV=1	Function unknown	uncharacterized protein LOC101303081 [Fragaria vesca subsp. vesca]
							maker-Fvb2-4-augustus-gene-51.33	5151548	5155048	-	--	Molecular Function: DNA binding (GO:0003677);; Cellular Component: nucleus (GO:0005634);	--	--	B3 DNA binding domain	B3 domain-containing transcription factor VRN1 OS=Arabidopsis thaliana OX=3702 GN=VRN1 PE=1 SV=1	Putative transcription factor B3-Domain family OS=Rosa chinensis OX=74649 GN=RchiOBHm_Chr6g0259941 PE=4 SV=1	Transcription	B3 domain-containing transcription factor VRN1 [Fragaria vesca subsp. vesca]
							maker-Fvb2-4-augustus-gene-52.23	5259477	5260703	+	--	Biological Process: pollen tube guidance (GO:0010183);; Molecular Function: mediator complex binding (GO:0036033);	--	--	--	CCG-binding protein 1 OS=Arabidopsis thaliana OX=3702 GN=MEE14 PE=1 SV=1	Uncharacterized protein OS=Rosa chinensis OX=74649 GN=RchiOBHm_Chr6g0259611 PE=4 SV=1	--	uncharacterized protein LOC101299254 [Fragaria vesca subsp. vesca]
							maker-Fvb2-4-augustus-gene-52.27	5199746	5200511	-	--	Cellular Component: chromatin (GO:0000785);; Molecular Function: DNA binding (GO:0003677);; Cellular Component: nucleus (GO:0005634);; Biological Process: regulation of transcription, DNA-templated (GO:0006355);	--	--	B3 DNA binding domain	--	Putative transcription factor B3-Domain family OS=Rosa chinensis OX=74649 GN=RchiOBHm_Chr6g0259781 PE=4 SV=1	--	B3 domain-containing protein At5g18090-like [Rosa chinensis]
							maker-Fvb2-4-augustus-gene-52.29	5214298	5218699	-	--	Biological Process: regulation of transcription, DNA-templated (GO:0006355);	K23408	--	Zinc-finger domain of monoamine-oxidase A repressor R1	--	Putative Zinc-finger domain of monoamine-oxidase A repressor R1 OS=Rosa chinensis OX=74649 GN=RchiOBHm_Chr6g0259631 PE=4 SV=1	Function unknown	cell division cycle-associated protein 7-like [Fragaria vesca subsp. vesca]
							maker-Fvb2-4-augustus-gene-52.31	5225127	5234927	-	--	Cellular Component: integral component of membrane (GO:0016021);; Molecular Function: phosphatidylinositol binding (GO:0035091);	K17925	--	PXA domain	--	Putative Phox domain, sorting nexin OS=Rosa chinensis OX=74649 GN=RchiOBHm_Chr6g0259621 PE=3 SV=1	--	uncharacterized protein LOC101300409 [Fragaria vesca subsp. vesca]
							maker-Fvb2-4-snap-gene-51.36	5141426	5145658	+	--	Cellular Component: integral component of membrane (GO:0016021);	--	--	Family of unknown function (DUF716)	--	Uncharacterized protein OS=Prunus persica OX=3760 GN=PRUPE_8G112800 PE=3 SV=1	Function unknown	transmembrane protein 45B [Fragaria vesca subsp. vesca]
							maker-Fvb2-4-snap-gene-51.41	5127516	5130367	-	Defense mechanisms	Molecular Function: ATP binding (GO:0005524);; Cellular Component: integral component of membrane (GO:0016021);; Molecular Function: ATPase activity (GO:0016887);; Molecular Function: ATPase-coupled transmembrane transporter activity (GO:0042626);	K05666	Secondary metabolites biosynthesis, transport and catabolism	ABC transporter transmembrane region	ABC transporter C family member 10 OS=Arabidopsis thaliana OX=3702 GN=ABCC10 PE=2 SV=2	Putative xenobiotic-transporting ATPase OS=Rosa chinensis OX=74649 GN=RchiOBHm_Chr1g0379831 PE=4 SV=1	Secondary metabolites biosynthesis, transport and catabolism	ABC transporter C family member 10-like [Fragaria vesca subsp. vesca]
							maker-Fvb2-4-snap-gene-51.45	5170693	5181083	-	--	Molecular Function: DNA binding (GO:0003677);; Cellular Component: nucleus (GO:0005634);	--	--	B3 DNA binding domain	B3 domain-containing protein REM23 OS=Arabidopsis thaliana OX=3702 GN=REM23 PE=2 SV=1	Putative transcription factor B3-Domain family OS=Rosa chinensis OX=74649 GN=RchiOBHm_Chr6g0259791 PE=4 SV=1	--	B3 domain-containing protein At5g18000-like isoform X3 [Fragaria vesca subsp. vesca]
							maker-Fvb2-4-snap-gene-52.32	5203848	5205663	+	--	--	--	--	--	--	Uncharacterized protein OS=Rosa chinensis OX=74649 GN=RchiOBHm_Chr6g0259741 PE=4 SV=1	--	uncharacterized protein LOC101301448 [Fragaria vesca subsp. vesca]
							maker-Fvb2-4-snap-gene-52.37	5206159	5209730	-	--	Biological Process: regulation of transcription, DNA-templated (GO:0006355);	K23408	--	Zinc-finger domain of monoamine-oxidase A repressor R1	--	Putative chromatin regulator PHD family OS=Rosa chinensis OX=74649 GN=RchiOBHm_Chr6g0259731 PE=4 SV=1	--	uncharacterized protein LOC101314826 [Fragaria vesca subsp. vesca]
							snap_masked-Fvb2-4-processed-gene-52.11	5188839	5192576	-	--	Molecular Function: ATP binding (GO:0005524);; Molecular Function: hydrolase activity (GO:0016787);	K13525	Posttranslational modification, protein turnover, chaperones	Cell division protein 48 (CDC48), N-terminal domain	Cell division control protein 48 homolog A OS=Arabidopsis thaliana OX=3702 GN=CDC48A PE=1 SV=1	Putative vesicle-fusing ATPase OS=Rosa chinensis OX=74649 GN=RchiOBHm_Chr6g0259281 PE=4 SV=1	Posttranslational modification, protein turnover, chaperones	cell division control protein 48 homolog E-like [Fragaria vesca subsp. vesca]
Fvb2-4	5350001	5460000	109999	9	0.280897	2.79574
							augustus_masked-Fvb2-4-processed-gene-53.9	5361436	5362563	+	--	Cellular Component: integral component of membrane (GO:0016021);	--	--	Protein of unknown function (DUF677)	UPF0496 protein At4g34320 OS=Arabidopsis thaliana OX=3702 GN=At4g34320 PE=2 SV=1	Uncharacterized protein OS=Rosa chinensis OX=74649 GN=RchiOBHm_Chr6g0262961 PE=3 SV=1	Function unknown	UPF0496 protein At4g34320-like [Fragaria vesca subsp. vesca]
							augustus_masked-Fvb2-4-processed-gene-54.2	5432605	5434850	+
							augustus_masked-Fvb2-4-processed-gene-54.3	5437289	5438305	+	--	--	--	--	Protein of unknown function (DUF677)	--	Uncharacterized protein OS=Rosa chinensis OX=74649 GN=RchiOBHm_Chr6g0262571 PE=3 SV=1	--	UPF0496 protein At4g34320-like [Fragaria vesca subsp. vesca]
							augustus_masked-Fvb2-4-processed-gene-54.5	5445417	5446601	+	--	Cellular Component: integral component of membrane (GO:0016021);	--	--	Protein of unknown function (DUF677)	UPF0496 protein At2g18630 OS=Arabidopsis thaliana OX=3702 GN=At2g18630 PE=2 SV=3	Uncharacterized protein OS=Rosa chinensis OX=74649 GN=RchiOBHm_Chr0c38g0503041 PE=3 SV=1	Function unknown	UPF0496 protein At4g34320-like [Fragaria vesca subsp. vesca]
							augustus_masked-Fvb2-4-processed-gene-54.9	5454571	5454777	-
							maker-Fvb2-4-augustus-gene-54.28	5408742	5412523	-	--	Molecular Function: 1-acylglycerol-3-phosphate O-acyltransferase activity (GO:0003841);; Cellular Component: integral component of membrane (GO:0016021);	K13513	Lipid transport and metabolism	Acyltransferase	Probable 1-acyl-sn-glycerol-3-phosphate acyltransferase 5 OS=Arabidopsis thaliana OX=3702 GN=LPAT5 PE=2 SV=1	1-acylglycerol-3-phosphate O-acyltransferase OS=Rosa chinensis OX=74649 GN=RchiOBHm_Chr6g0262951 PE=3 SV=1	Lipid transport and metabolism	probable 1-acyl-sn-glycerol-3-phosphate acyltransferase 5 [Fragaria vesca subsp. vesca]
							maker-Fvb2-4-snap-gene-54.29	5438998	5441221	+	--	Cellular Component: integral component of membrane (GO:0016021);	--	--	Protein of unknown function (DUF677)	--	Uncharacterized protein OS=Rosa chinensis OX=74649 GN=RchiOBHm_Chr0c38g0503051 PE=3 SV=1	--	uncharacterized protein LOC101310288 isoform X2 [Fragaria vesca subsp. vesca]
							snap_masked-Fvb2-4-processed-gene-54.11	5373273	5394604	-
							snap_masked-Fvb2-4-processed-gene-54.13	5419548	5423230	+
Fvb2-4	5540001	5640000	99999	11	0.309925	2.86718
							augustus_masked-Fvb2-4-processed-gene-55.10	5576527	5581268	-	--	--	K22763	Function unknown	PPPDE putative peptidase domain	DeSI-like protein At4g17486 OS=Arabidopsis thaliana OX=3702 GN=At4g17486 PE=2 SV=1	Putative PPPDE putative peptidase domain-containing protein OS=Rosa chinensis OX=74649 GN=RchiOBHm_Chr6g0263121 PE=3 SV=1	Function unknown	deSI-like protein At4g17486 [Fragaria vesca subsp. vesca]
							augustus_masked-Fvb2-4-processed-gene-56.0	5596572	5600590	+	--	Molecular Function: DNA-binding transcription factor activity (GO:0003700);	K09060	--	--	--	Putative transcription factor bZIP family OS=Rosa chinensis OX=74649 GN=RchiOBHm_Chr6g0263141 PE=4 SV=1	--	G-box-binding factor 1-like [Rosa chinensis]
							maker-Fvb2-4-augustus-gene-55.22	5557144	5560789	+	--	Molecular Function: ubiquitin activating enzyme activity (GO:0004839);; Molecular Function: ATP binding (GO:0005524);; Molecular Function: transferase activity, transferring acyl groups (GO:0016746);	K10579	Posttranslational modification, protein turnover, chaperones	Ubiquitin-conjugating enzyme	NEDD8-conjugating enzyme Ubc12 OS=Arabidopsis thaliana OX=3702 GN=RCE1 PE=1 SV=1	Putative aminoacyltransferase, E1 ubiquitin-activating enzyme OS=Rosa chinensis OX=74649 GN=RchiOBHm_Chr6g0263031 PE=3 SV=1	Posttranslational modification, protein turnover, chaperones	NEDD8-conjugating enzyme Ubc12-like [Rosa chinensis]
							maker-Fvb2-4-augustus-gene-55.24	5563331	5567267	-	Energy production and conversion	Molecular Function: NAD(P)H dehydrogenase (quinone) activity (GO:0003955);; Molecular Function: FMN binding (GO:0010181);	K03809	General function prediction only	NADPH-dependent FMN reductase	Probable NAD(P)H dehydrogenase (quinone) FQR1-like 2 OS=Arabidopsis thaliana OX=3702 GN=At4g36750 PE=1 SV=1	NAD(P)H dehydrogenase (quinone) OS=Rosa chinensis OX=74649 GN=RchiOBHm_Chr6g0263101 PE=3 SV=1	Function unknown	probable NAD(P)H dehydrogenase (quinone) FQR1-like 1 [Fragaria vesca subsp. vesca]
							maker-Fvb2-4-augustus-gene-56.25	5601644	5603995	-	--	Cellular Component: Golgi membrane (GO:0000139);; Molecular Function: transferase activity, transferring glycosyl groups (GO:0016757);; Biological Process: cell wall organization (GO:0071555);	K20783	--	Nucleotide-diphospho-sugar transferase	Arabinosyltransferase RRA2 OS=Arabidopsis thaliana OX=3702 GN=RRA2 PE=2 SV=1	Glycosyltransferase OS=Rosa chinensis OX=74649 GN=RchiOBHm_Chr6g0263151 PE=3 SV=1	Carbohydrate transport and metabolism	UDP-D-xylose:L-fucose alpha-1,3-D-xylosyltransferase 2-like [Fragaria vesca subsp. vesca]
							maker-Fvb2-4-augustus-gene-56.27	5617898	5622792	-	--	Cellular Component: histone acetyltransferase complex (GO:0000123);; Molecular Function: DNA binding (GO:0003677);	K18401	--	Potential DNA-binding domain	--	KAT8 regulatory NSL complex subunit 2 OS=Rosa chinensis OX=74649 GN=RchiOBHm_Chr6g0263161 PE=4 SV=1	Function unknown	uncharacterized protein LOC112173139 [Rosa chinensis]
							maker-Fvb2-4-augustus-gene-56.28	5638903	5642592	-	--	Cellular Component: membrane (GO:0016020);	K17279	Intracellular trafficking, secretion, and vesicular transport	TB2/DP1, HVA22 family	HVA22-like protein k OS=Arabidopsis thaliana OX=3702 GN=HVA22K PE=2 SV=1	HVA22-like protein OS=Rosa chinensis OX=74649 GN=RchiOBHm_Chr6g0263171 PE=3 SV=1	Intracellular trafficking, secretion, and vesicular transport	HVA22-like protein k [Fragaria vesca subsp. vesca]
							maker-Fvb2-4-snap-gene-55.30	5522308	5540646	+	--	Cellular Component: integral component of membrane (GO:0016021);	K07399	--	ResB-like family	Cytochrome c biogenesis protein CCS1, chloroplastic OS=Arabidopsis thaliana OX=3702 GN=CCS1 PE=1 SV=1	Putative ResB-like domain-containing protein OS=Rosa chinensis OX=74649 GN=RchiOBHm_Chr6g0262411 PE=3 SV=1	Posttranslational modification, protein turnover, chaperones	cytochrome c biogenesis protein CCS1, chloroplastic [Fragaria vesca subsp. vesca]
							maker-Fvb2-4-snap-gene-56.33	5615243	5616451	-	--	Molecular Function: protein binding (GO:0005515);	K14962	--	WD domain, G-beta repeat	Protein ANTHESIS POMOTING FACTOR 1 OS=Arabidopsis thaliana OX=3702 GN=APRF1 PE=2 SV=1	Putative transcription factor WD40-like family OS=Rosa chinensis OX=74649 GN=RchiOBHm_Chr2g0172941 PE=4 SV=1	--	WD repeat-containing protein 82 [Fragaria vesca subsp. vesca]
							maker-Fvb2-4-snap-gene-56.35	5636123	5636701	-	--	--	--	--	--	--	Putative F-box domain-containing protein OS=Rosa chinensis OX=74649 GN=RchiOBHm_Chr2g0154521 PE=4 SV=1	Function unknown	F-box/kelch-repeat protein At3g06240-like [Fragaria vesca subsp. vesca]
							snap_masked-Fvb2-4-processed-gene-55.17	5541866	5542417	-	Lipid transport and metabolism	Biological Process: isopentenyl diphosphate biosynthetic process, methylerythritol 4-phosphate pathway (GO:0019288);; Molecular Function: metal ion binding (GO:0046872);; Biological Process: dimethylallyl diphosphate biosynthetic process (GO:0050992);; Molecular Function: 4-hydroxy-3-methylbut-2-en-1-yl diphosphate reductase activity (GO:0051745);	K03527	--	LytB protein	4-hydroxy-3-methylbut-2-enyl diphosphate reductase, chloroplastic OS=Oryza sativa subsp. japonica OX=39947 GN=ISPH PE=2 SV=1	Uncharacterized protein OS=Populus trichocarpa OX=3694 GN=POPTR_009G111600 PE=3 SV=1	--	4-hydroxy-3-methylbut-2-enyl diphosphate reductase, chloroplastic-like [Fragaria vesca subsp. vesca]
Fvb2-4	840001	940000	99999	15	0.274501	3.54648
							augustus_masked-Fvb2-4-processed-gene-9.0	896423	897169	+
							maker-Fvb2-4-augustus-gene-8.26	872445	876030	+	--	Molecular Function: protein kinase activity (GO:0004672);; Molecular Function: ATP binding (GO:0005524);	K08269	--	--	Serine/threonine-protein kinase ATG1a OS=Arabidopsis thaliana OX=3702 GN=ATG1A PE=1 SV=1	Protein kinase domain-containing protein OS=Rosa chinensis OX=74649 GN=RchiOBHm_Chr1g0361311 PE=4 SV=1	Signal transduction mechanisms	serine/threonine-protein kinase ATG1 [Fragaria vesca subsp. vesca]
							maker-Fvb2-4-augustus-gene-8.27	878160	888203	+	--	--	--	--	Urb2/Npa2 family	--	Putative nucleolar 27S pre-rRNA processing, Urb2/Npa2 OS=Rosa chinensis OX=74649 GN=RchiOBHm_Chr2g0118221 PE=4 SV=1	Function unknown	uncharacterized protein LOC101299549 isoform X1 [Fragaria vesca subsp. vesca]
							maker-Fvb2-4-augustus-gene-8.28	841619	845150	-	--	Cellular Component: endoplasmic reticulum (GO:0005783);; Biological Process: protein retention in ER lumen (GO:0006621);; Cellular Component: integral component of membrane (GO:0016021);; Molecular Function: ER retention sequence binding (GO:0046923);	K10949	Intracellular trafficking, secretion, and vesicular transport	ER lumen protein retaining receptor	ER lumen protein-retaining receptor OS=Petunia hybrida OX=4102 GN=ERD2 PE=2 SV=1	Putative ER lumen protein retaining receptor OS=Rosa chinensis OX=74649 GN=RchiOBHm_Chr6g0245611 PE=3 SV=1	Intracellular trafficking, secretion, and vesicular transport	putative ER lumen protein-retaining receptor C28H8.4 [Fragaria vesca subsp. vesca]
							maker-Fvb2-4-augustus-gene-8.29	845811	850918	-	Carbohydrate transport and metabolism	Molecular Function: sucrose alpha-glucosidase activity (GO:0004575);; Biological Process: sucrose catabolic process (GO:0005987);; Molecular Function: glycopeptide alpha-N-acetylgalactosaminidase activity (GO:0033926);	K03884	--	Alkaline and neutral invertase	Probable alkaline/neutral invertase B OS=Arabidopsis thaliana OX=3702 GN=INVB PE=1 SV=1	Alkaline/neutral invertase OS=Rosa chinensis OX=74649 GN=RchiOBHm_Chr6g0245601 PE=3 SV=1	Function unknown	probable alkaline/neutral invertase B [Fragaria vesca subsp. vesca]
							maker-Fvb2-4-augustus-gene-9.37	914035	915681	+	Carbohydrate transport and metabolism	Molecular Function: channel activity (GO:0015267);; Cellular Component: integral component of membrane (GO:0016021);	K09866	Carbohydrate transport and metabolism	Major intrinsic protein	Probable aquaporin PIP1-4 OS=Arabidopsis thaliana OX=3702 GN=PIP1.4 PE=1 SV=1	Putative major intrinsic protein OS=Rosa chinensis OX=74649 GN=RchiOBHm_Chr6g0245841 PE=3 SV=1	Carbohydrate transport and metabolism	aquaporin-like [Fragaria vesca subsp. vesca]
							maker-Fvb2-4-augustus-gene-9.39	925004	926653	+	Carbohydrate transport and metabolism	Molecular Function: channel activity (GO:0015267);; Cellular Component: integral component of membrane (GO:0016021);	K09866	Carbohydrate transport and metabolism	Major intrinsic protein	Probable aquaporin PIP1-4 OS=Arabidopsis thaliana OX=3702 GN=PIP1.4 PE=1 SV=1	Putative major intrinsic protein OS=Rosa chinensis OX=74649 GN=RchiOBHm_Chr6g0245841 PE=3 SV=1	Carbohydrate transport and metabolism	aquaporin-like [Fragaria vesca subsp. vesca]
							maker-Fvb2-4-augustus-gene-9.42	898125	901238	-	--	Biological Process: cellulose microfibril organization (GO:0010215);; Cellular Component: integral component of membrane (GO:0016021);; Cellular Component: anchored component of membrane (GO:0031225);	--	--	COBRA-like protein	COBRA-like protein 1 OS=Oryza sativa subsp. japonica OX=39947 GN=BC1L6 PE=2 SV=1	COBRA-like protein OS=Rosa chinensis OX=74649 GN=RchiOBHm_Chr6g0245661 PE=3 SV=1	Function unknown	hypothetical protein RchiOBHm_Chr6g0245661 [Rosa chinensis]
							maker-Fvb2-4-snap-gene-8.38	866343	867435	-	Function unknown	Cellular Component: extracellular region (GO:0005576);	K13449	Function unknown	Cysteine-rich secretory protein family	Pathogenesis-related protein 1A OS=Nicotiana tabacum OX=4097 PE=1 SV=1	Pathogenesis-related protein-1-like protein OS=Prunus dulcis OX=3755 GN=Prudu_022329 PE=4 SV=1	Function unknown	pathogenesis-related protein 1-like [Fragaria vesca subsp. vesca]
							maker-Fvb2-4-snap-gene-8.39	873905	877055	-	--	Molecular Function: DNA binding (GO:0003677);; Cellular Component: nucleus (GO:0005634);	K12133	Posttranslational modification, protein turnover, chaperones	--	Protein LHY OS=Arabidopsis thaliana OX=3702 GN=LHY PE=1 SV=2	Putative transcription factor MYB-HB-like family OS=Rosa chinensis OX=74649 GN=RchiOBHm_Chr1g0361301 PE=4 SV=1	Transcription	protein LHY-like [Fragaria vesca subsp. vesca]
							maker-Fvb2-4-snap-gene-9.52	936611	937201	+
							maker-Fvb2-4-snap-gene-9.56	929817	934620	-	--	Molecular Function: calcium ion binding (GO:0005509);	--	--	--	--	Putative EF-hand domain pair protein OS=Rosa chinensis OX=74649 GN=RchiOBHm_Chr6g0245891 PE=4 SV=1	Function unknown	uncharacterized protein LOC101300297 [Fragaria vesca subsp. vesca]
							snap_masked-Fvb2-4-processed-gene-9.19	899286	900339	+	--	--	--	--	--	--	Uncharacterized protein OS=Cucumis sativus OX=3659 GN=Csa_7G009205 PE=4 SV=1	--	unknown protein [Oryza sativa Japonica Group]
							snap_masked-Fvb2-4-processed-gene-9.23	918649	920679	+	--	Molecular Function: molecular_function (GO:0003674);; Molecular Function: nucleic acid binding (GO:0003676);; Molecular Function: RNA binding (GO:0003723);; Molecular Function: catalytic activity (GO:0003824);; Molecular Function: nuclease activity (GO:0004518);; Molecular Function: endonuclease activity (GO:0004519);; Molecular Function: binding (GO:0005488);; Cellular Component: cellular_compon…	K22733	General function prediction only	PPR repeat	Pentatricopeptide repeat-containing protein At2g44880 OS=Arabidopsis thaliana OX=3702 GN=PCMP-E9 PE=2 SV=2	Putative tetratricopeptide-like helical domain-containing protein OS=Rosa chinensis OX=74649 GN=RchiOBHm_Chr1g0347541 PE=4 SV=1	Translation, ribosomal structure and biogenesis	pentatricopeptide repeat-containing protein At2g44880 [Fragaria vesca subsp. vesca]
							snap_masked-Fvb2-4-processed-gene-9.25	930269	930987	+	--	Molecular Function: channel activity (GO:0015267);; Cellular Component: integral component of membrane (GO:0016021);	K09866	Carbohydrate transport and metabolism	Major intrinsic protein	Probable aquaporin PIP2-6 OS=Oryza sativa subsp. japonica OX=39947 GN=PIP2-6 PE=2 SV=2	Putative major intrinsic protein OS=Rosa chinensis OX=74649 GN=RchiOBHm_Chr6g0245871 PE=3 SV=1	Carbohydrate transport and metabolism	aquaporin TIP1-2-like [Fragaria vesca subsp. vesca]
Fvb3-1	10610001	10710000	99999	8	0.326106	4.50375
							maker-Fvb3-1-augustus-gene-106.25	10614288	10616617	-	--	--	K22761	--	--	--	Uncharacterized protein OS=Rosa chinensis OX=74649 GN=RchiOBHm_Chr1g0378531 PE=4 SV=1	Function unknown	DNA-directed primase/polymerase protein isoform X4 [Fragaria vesca subsp. vesca]
							maker-Fvb3-1-augustus-gene-107.26	10702893	10706461	-	Translation, ribosomal structure and biogenesis	Molecular Function: tyrosine-tRNA ligase activity (GO:0004831);; Molecular Function: ATP binding (GO:0005524);; Biological Process: tRNA aminoacylation for protein translation (GO:0006418);	K01866	Translation, ribosomal structure and biogenesis	tRNA synthetases class I (W and Y)	Tyrosine--tRNA ligase 2, cytoplasmic OS=Arabidopsis thaliana OX=3702 GN=At1g28350 PE=1 SV=1	Tyrosyl-tRNA synthetase OS=Rosa chinensis OX=74649 GN=RchiOBHm_Chr5g0057181 PE=3 SV=1	Translation, ribosomal structure and biogenesis	tyrosine--tRNA ligase 1, cytoplasmic-like isoform X1 [Rosa chinensis]
							maker-Fvb3-1-snap-gene-106.28	10655609	10657448	+	--	Molecular Function: zinc ion binding (GO:0008270);	K17604	--	SWIM zinc finger	--	Mutator-like transposase OS=Rosa rugosa OX=74645 PE=4 SV=1	Function unknown	uncharacterized protein LOC101297209 [Fragaria vesca subsp. vesca]
							maker-Fvb3-1-snap-gene-106.29	10652874	10653795	+
							maker-Fvb3-1-snap-gene-106.30	10653841	10655287	+	--	Molecular Function: zinc ion binding (GO:0008270);	--	--	--	--	Mutator-like transposase OS=Rosa rugosa OX=74645 PE=4 SV=1	--	uncharacterized protein LOC101297209 [Fragaria vesca subsp. vesca]
							snap_masked-Fvb3-1-processed-gene-106.20	10644357	10644590	-
							snap_masked-Fvb3-1-processed-gene-106.21	10668803	10669218	-
							snap_masked-Fvb3-1-processed-gene-107.9	10690169	10693205	+	Cell wall/membrane/envelope biogenesis	Molecular Function: UDP-glucuronate decarboxylase activity (GO:0048040);	K12449	--	NAD dependent epimerase/dehydratase family	UDP-D-apiose/UDP-D-xylose synthase 2 OS=Arabidopsis thaliana OX=3702 GN=AXS2 PE=2 SV=1	Putative UDP-glucuronate decarboxylase OS=Rosa chinensis OX=74649 GN=RchiOBHm_Chr5g0055821 PE=4 SV=1	--	UDP-D-apiose/UDP-D-xylose synthase 2 [Fragaria vesca subsp. vesca]
Fvb3-1	10720001	10820000	99999	13	0.26913	4.91648
							augustus_masked-Fvb3-1-processed-gene-107.3	10750646	10752242	+	Transcription	Molecular Function: ADP binding (GO:0043531);	K13457	--	NB-ARC domain	Probable disease resistance protein At4g33300 OS=Arabidopsis thaliana OX=3702 GN=At4g33300 PE=2 SV=3	Putative powdery mildew resistance protein, RPW8 OS=Rosa chinensis OX=74649 GN=RchiOBHm_Chr6g0299881 PE=3 SV=1	Function unknown	probable disease resistance protein At4g33300 [Fragaria vesca subsp. vesca]
							augustus_masked-Fvb3-1-processed-gene-107.4	10778904	10779149	+
							maker-Fvb3-1-augustus-gene-107.22	10722584	10726329	+	--	Cellular Component: integral component of membrane (GO:0016021);	K20854	--	Protein RETICULATA-related	Protein RETICULATA-RELATED 1, chloroplastic OS=Arabidopsis thaliana OX=3702 GN=RER1 PE=1 SV=1	Uncharacterized protein OS=Rosa chinensis OX=74649 GN=RchiOBHm_Chr5g0055771 PE=3 SV=1	Function unknown	uncharacterized protein LOC101309918 [Fragaria vesca subsp. vesca]
							maker-Fvb3-1-augustus-gene-107.25	10779435	10784495	+	--	Biological Process: ion transport (GO:0006811);; Cellular Component: integral component of membrane (GO:0016021);	K16075	Inorganic ion transport and metabolism	--	Magnesium transporter MRS2-11, chloroplastic OS=Arabidopsis thaliana OX=3702 GN=MRS2-11 PE=1 SV=1	Magnesium transporter OS=Rosa chinensis OX=74649 GN=RchiOBHm_Chr5g0055951 PE=3 SV=1	Inorganic ion transport and metabolism	magnesium transporter MRS2-11, chloroplastic [Fragaria vesca subsp. vesca]
							maker-Fvb3-1-augustus-gene-107.28	10718431	10720486	-	--	--	--	--	NPH3 family	BTB/POZ domain-containing protein At3g44820 OS=Arabidopsis thaliana OX=3702 GN=At3g44820 PE=2 SV=2	Putative SKP1/BTB/POZ domain, NPH3 domain-containing protein OS=Rosa chinensis OX=74649 GN=RchiOBHm_Chr5g0055801 PE=3 SV=1	Function unknown	BTB/POZ domain-containing protein At3g44820 isoform X1 [Fragaria vesca subsp. vesca]
							maker-Fvb3-1-augustus-gene-107.29	10739872	10748337	-	--	Molecular Function: metal ion binding (GO:0046872);	K11643	--	DDT domain	DDT domain-containing protein PTM OS=Arabidopsis thaliana OX=3702 GN=PTM PE=1 SV=1	Putative transcription factor interactor and regulator LIM family OS=Rosa chinensis OX=74649 GN=RchiOBHm_Chr5g0055621 PE=4 SV=1	--	uncharacterized protein LOC101310205 [Fragaria vesca subsp. vesca]
							maker-Fvb3-1-augustus-gene-108.28	10809903	10814027	+	--	Molecular Function: aspartic-type endopeptidase activity (GO:0004190);	K00924	Posttranslational modification, protein turnover, chaperones	Xylanase inhibitor N-terminal	Aspartic proteinase 36 OS=Arabidopsis thaliana OX=3702 GN=A36 PE=1 SV=1	Putative nepenthesin OS=Rosa chinensis OX=74649 GN=RchiOBHm_Chr5g0055981 PE=3 SV=1	Posttranslational modification, protein turnover, chaperones	aspartic proteinase-like protein 2 [Fragaria vesca subsp. vesca]
							maker-Fvb3-1-snap-gene-108.41	10799554	10801983	-	--	Molecular Function: nucleic acid binding (GO:0003676);; Molecular Function: RNA-DNA hybrid ribonuclease activity (GO:0004523);; Molecular Function: ubiquitin-protein transferase activity (GO:0004842);; Molecular Function: metal ion binding (GO:0046872);	K11968	Posttranslational modification, protein turnover, chaperones	IBR domain, a half RING-finger domain	--	RING-type domain-containing protein OS=Malus domestica OX=3750 GN=DVH24_005979 PE=3 SV=1	Posttranslational modification, protein turnover, chaperones	hypothetical protein DVH24_005979 [Malus domestica]
							maker-Fvb3-1-snap-gene-108.43	10814271	10815160	-	--	Molecular Function: nucleic acid binding (GO:0003676);; Biological Process: gene silencing by RNA (GO:0031047);	K11593	Translation, ribosomal structure and biogenesis	Piwi domain	Protein argonaute 5 OS=Arabidopsis thaliana OX=3702 GN=AGO5 PE=1 SV=2	Putative post-transcriptional gene silencing PAZ-Argonaute family OS=Rosa chinensis OX=74649 GN=RchiOBHm_Chr5g0055991 PE=3 SV=1	Translation, ribosomal structure and biogenesis	putative post-transcriptional gene silencing PAZ-Argonaute family [Rosa chinensis]
							maker-Fvb3-1-snap-gene-108.45	10819302	10821304	-	--	Molecular Function: nucleic acid binding (GO:0003676);; Biological Process: gene silencing by RNA (GO:0031047);	K11593	Translation, ribosomal structure and biogenesis	Piwi domain	Protein argonaute MEL1 OS=Oryza sativa subsp. japonica OX=39947 GN=MEL1 PE=2 SV=1	Putative post-transcriptional gene silencing PAZ-Argonaute family OS=Rosa chinensis OX=74649 GN=RchiOBHm_Chr5g0056081 PE=3 SV=1	Translation, ribosomal structure and biogenesis	protein argonaute 5-like isoform X1 [Rosa chinensis]
							snap_masked-Fvb3-1-processed-gene-107.12	10727156	10739193	+	--	Biological Process: intracellular protein transport (GO:0006886);; Cellular Component: AP-2 adaptor complex (GO:0030122);; Molecular Function: clathrin adaptor activity (GO:0035615);; Biological Process: clathrin-dependent endocytosis (GO:0072583);	K11824	Intracellular trafficking, secretion, and vesicular transport	Adaptin N terminal region	AP-2 complex subunit alpha-1 OS=Arabidopsis thaliana OX=3702 GN=ALPHA-ADR PE=1 SV=1	AP-2 complex subunit alpha OS=Rosa chinensis OX=74649 GN=RchiOBHm_Chr5g0055751 PE=3 SV=1	Intracellular trafficking, secretion, and vesicular transport	AP-2 complex subunit alpha-1-like [Fragaria vesca subsp. vesca]
							snap_masked-Fvb3-1-processed-gene-107.20	10778010	10779012	-
							snap_masked-Fvb3-1-processed-gene-108.16	10799717	10800649	+
Fvb3-1	11230001	11330000	99999	10	0.277534	5.51316
							augustus_masked-Fvb3-1-processed-gene-112.1	11244663	11245434	+	--	Molecular Function: pectinesterase activity (GO:0030599);; Biological Process: cell wall modification (GO:0042545);; Molecular Function: aspartyl esterase activity (GO:0045330);; Biological Process: pectin catabolic process (GO:0045490);	K01051	--	Pectinesterase	Pectinesterase PPME1 OS=Arabidopsis thaliana OX=3702 GN=PPME1 PE=1 SV=1	Pectinesterase OS=Rosa chinensis OX=74649 GN=RchiOBHm_Chr1g0373011 PE=4 SV=1	Carbohydrate transport and metabolism	pectinesterase PPME1-like [Fragaria vesca subsp. vesca]
							maker-Fvb3-1-augustus-gene-112.13	11241504	11242285	-	--	Molecular Function: alpha-mannosidase activity (GO:0004559);; Biological Process: mannose metabolic process (GO:0006013);; Molecular Function: carbohydrate binding (GO:0030246);; Molecular Function: metal ion binding (GO:0046872);	K01191	Carbohydrate transport and metabolism	Glycosyl hydrolases family 38 C-terminal domain	Alpha-mannosidase OS=Canavalia ensiformis OX=3823 PE=1 SV=1	Alpha-mannosidase OS=Rosa chinensis OX=74649 GN=RchiOBHm_Chr2g0099201 PE=3 SV=1	Carbohydrate transport and metabolism	alpha-mannosidase isoform X2 [Fragaria vesca subsp. vesca]
							maker-Fvb3-1-augustus-gene-112.14	11244602	11245239	-	--	Molecular Function: pectinesterase activity (GO:0030599);; Biological Process: cell wall modification (GO:0042545);; Molecular Function: aspartyl esterase activity (GO:0045330);; Biological Process: pectin catabolic process (GO:0045490);	K01051	--	Pectinesterase	Pectinesterase PPME1 OS=Arabidopsis thaliana OX=3702 GN=PPME1 PE=1 SV=1	Pectinesterase OS=Rosa chinensis OX=74649 GN=RchiOBHm_Chr1g0373011 PE=4 SV=1	Carbohydrate transport and metabolism	pectinesterase PPME1-like [Fragaria vesca subsp. vesca]
							maker-Fvb3-1-augustus-gene-113.39	11291798	11295864	+	--	Cellular Component: cellular_component (GO:0005575);; Cellular Component: cell wall (GO:0005618);; Cellular Component: obsolete cell (GO:0005623);; Cellular Component: plasma membrane (GO:0005886);; Biological Process: multicellular organism development (GO:0007275);; Biological Process: biological_process (GO:0008150);; Cellular Component: membrane (GO:0016020);; Biological Process: root system …	--	--	Fasciclin domain	Fasciclin-like arabinogalactan protein 1 OS=Arabidopsis thaliana OX=3702 GN=FLA1 PE=1 SV=1	Putative fasciclin-like arabinogalactan protein OS=Rosa chinensis OX=74649 GN=RchiOBHm_Chr5g0053441 PE=3 SV=1	Function unknown	fasciclin-like arabinogalactan protein 1 [Fragaria vesca subsp. vesca]
							maker-Fvb3-1-augustus-gene-113.41	11297451	11304334	-	Translation, ribosomal structure and biogenesis	Molecular Function: histidine-tRNA ligase activity (GO:0004821);; Molecular Function: ATP binding (GO:0005524);; Cellular Component: cytoplasm (GO:0005737);; Biological Process: histidyl-tRNA aminoacylation (GO:0006427);	K01892	Translation, ribosomal structure and biogenesis	Histidyl-tRNA synthetase	Histidine--tRNA ligase, chloroplastic/mitochondrial OS=Arabidopsis thaliana OX=3702 GN=At3g46100 PE=2 SV=1	Histidine--tRNA ligase OS=Rosa chinensis OX=74649 GN=RchiOBHm_Chr3g0470291 PE=3 SV=1	Translation, ribosomal structure and biogenesis	histidine--tRNA ligase, cytoplasmic [Fragaria vesca subsp. vesca]
							maker-Fvb3-1-snap-gene-112.18	11275770	11282324	-	--	Biological Process: lipid metabolic process (GO:0006629);; Molecular Function: glycerophosphodiester phosphodiesterase activity (GO:0008889);	K18696	General function prediction only	Glycerophosphoryl diester phosphodiesterase family	Glycerophosphodiester phosphodiesterase GDPD1, chloroplastic OS=Arabidopsis thaliana OX=3702 GN=GDPD1 PE=1 SV=1	Glycerophosphodiester phosphodiesterase OS=Rosa chinensis OX=74649 GN=RchiOBHm_Chr2g0176161 PE=4 SV=1	Energy production and conversion	glycerophosphodiester phosphodiesterase GDPD1, chloroplastic-like [Fragaria vesca subsp. vesca]
							maker-Fvb3-1-snap-gene-113.49	11319679	11326235	-	Nucleotide transport and metabolism	Molecular Function: hydrolase activity (GO:0016787);	K22763	Signal transduction mechanisms	Nudix hydrolase domain	Nudix hydrolase 10 OS=Arabidopsis thaliana OX=3702 GN=NUDT10 PE=1 SV=1	Putative hydrolase OS=Rosa chinensis OX=74649 GN=RchiOBHm_Chr5g0053461 PE=3 SV=1	Signal transduction mechanisms	nudix hydrolase 10-like isoform X1 [Rosa chinensis]
							snap_masked-Fvb3-1-processed-gene-112.8	11273780	11274821	+	--	Cellular Component: integral component of membrane (GO:0016021);; Cellular Component: chloroplast membrane (GO:0031969);	--	--	Chloroplast import apparatus Tic20-like	Protein TIC 20-v, chloroplastic OS=Arabidopsis thaliana OX=3702 GN=TIC20-V PE=2 SV=1	Protein TIC 20 OS=Malus domestica OX=3750 GN=DVH24_003927 PE=3 SV=1	Function unknown	protein TIC 20-v, chloroplastic [Fragaria vesca subsp. vesca]
							snap_masked-Fvb3-1-processed-gene-113.22	11328081	11328338	+	--	--	K06180	General function prediction only	PPR repeat	Pentatricopeptide repeat-containing protein At3g14330 OS=Arabidopsis thaliana OX=3702 GN=PCMP-H57 PE=2 SV=2	Putative pentatricopeptide OS=Rosa chinensis OX=74649 GN=RchiOBHm_Chr7g0232571 PE=4 SV=1	Function unknown	pentatricopeptide repeat-containing protein At1g08070-like [Fragaria vesca subsp. vesca]
							snap_masked-Fvb3-1-processed-gene-113.34	11312514	11312954	-
Fvb3-1	11730001	11930000	199999	19	0.58392	7.51653
							maker-Fvb3-1-augustus-gene-117.32	11728026	11738514	+	Replication, recombination and repair	Molecular Function: DNA binding (GO:0003677);; Biological Process: base-excision repair (GO:0006284);; Molecular Function: hydrolase activity, acting on glycosyl bonds (GO:0016798);; Molecular Function: lyase activity (GO:0016829);; Molecular Function: metal ion binding (GO:0046872);; Molecular Function: 4 iron, 4 sulfur cluster binding (GO:0051539);	K03575	Replication, recombination and repair	NUDIX domain	Adenine DNA glycosylase OS=Arabidopsis thaliana OX=3702 GN=MYH PE=3 SV=1	Adenine DNA glycosylase OS=Rosa chinensis OX=74649 GN=RchiOBHm_Chr5g0052821 PE=3 SV=1	Replication, recombination and repair	A/G-specific adenine DNA glycosylase [Fragaria vesca subsp. vesca]
							maker-Fvb3-1-augustus-gene-117.34	11763361	11769479	+	Signal transduction mechanisms	Molecular Function: ATP binding (GO:0005524);; Cellular Component: integral component of membrane (GO:0016021);; Molecular Function: ATPase activity (GO:0016887);	K05681	Secondary metabolites biosynthesis, transport and catabolism	ABC-2 type transporter	ABC transporter G family member 12 OS=Arabidopsis thaliana OX=3702 GN=ABCG12 PE=1 SV=1	Putative xenobiotic-transporting ATPase OS=Rosa chinensis OX=74649 GN=RchiOBHm_Chr5g0053001 PE=4 SV=1	Secondary metabolites biosynthesis, transport and catabolism	ABC transporter G family member 12-like [Fragaria vesca subsp. vesca]
							maker-Fvb3-1-augustus-gene-117.38	11740380	11745233	-	Function unknown	Molecular Function: ATP binding (GO:0005524);; Molecular Function: ATPase-coupled sulfate transmembrane transporter activity (GO:0015419);; Cellular Component: integral component of membrane (GO:0016021);; Molecular Function: ATPase activity (GO:0016887);	K05681	Secondary metabolites biosynthesis, transport and catabolism	ABC-2 type transporter	ABC transporter G family member 15 OS=Arabidopsis thaliana OX=3702 GN=ABCG15 PE=2 SV=2	Putative sulfate-transporting ATPase OS=Rosa chinensis OX=74649 GN=RchiOBHm_Chr5g0052971 PE=4 SV=1	Secondary metabolites biosynthesis, transport and catabolism	ABC transporter G family member 13-like isoform X1 [Fragaria vesca subsp. vesca]
							maker-Fvb3-1-augustus-gene-117.40	11773664	11775505	-	--	Biological Process: protein deubiquitination (GO:0016579);; Molecular Function: thiol-dependent ubiquitinyl hydrolase activity (GO:0036459);	--	--	--	--	Putative ubiquitinyl hydrolase 1 transcription factor C2H2 family OS=Rosa chinensis OX=74649 GN=RchiOBHm_Chr7g0180371 PE=4 SV=1	--	uncharacterized protein LOC101305088 [Fragaria vesca subsp. vesca]
							maker-Fvb3-1-augustus-gene-118.20	11857240	11871459	+	--	Molecular Function: RNA cap binding (GO:0000339);; Cellular Component: nuclear cap binding complex (GO:0005846);; Biological Process: mRNA cis splicing, via spliceosome (GO:0045292);; Biological Process: mRNA transport (GO:0051028);	K12882	RNA processing and modification	MIF4G like	Nuclear cap-binding protein subunit 1 OS=Arabidopsis thaliana OX=3702 GN=ABH1 PE=1 SV=2	Putative nuclear cap-binding protein subunit 1 OS=Rosa chinensis OX=74649 GN=RchiOBHm_Chr5g0051141 PE=3 SV=1	RNA processing and modification	nuclear cap-binding protein subunit 1 [Fragaria vesca subsp. vesca]
							maker-Fvb3-1-augustus-gene-118.21	11876199	11876729	+	Transcription	Molecular Function: DNA binding (GO:0003677);; Molecular Function: DNA-directed 5'-3' RNA polymerase activity (GO:0003899);; Biological Process: transcription, DNA-templated (GO:0006351);; Molecular Function: zinc ion binding (GO:0008270);; Cellular Component: integral component of membrane (GO:0016021);	K03007	Transcription	RNA polymerases N / 8 kDa subunit	DNA-directed RNA polymerase subunit 10-like protein OS=Arabidopsis thaliana OX=3702 GN=NRPB10L PE=1 SV=1	Uncharacterized protein OS=Nyssa sinensis OX=561372 GN=F0562_020993 PE=3 SV=1	Transcription	hypothetical protein F0562_020993 [Nyssa sinensis]
							maker-Fvb3-1-augustus-gene-118.22	11828399	11830534	-	--	Molecular Function: protein dimerization activity (GO:0046983);	K22484	Transcription	Helix-loop-helix DNA-binding domain	Transcription factor bHLH106 OS=Arabidopsis thaliana OX=3702 GN=BHLH106 PE=2 SV=1	Putative transcription factor bHLH family OS=Rosa chinensis OX=74649 GN=RchiOBHm_Chr5g0053301 PE=4 SV=1	Transcription	transcription factor bHLH106 [Fragaria vesca subsp. vesca]
							maker-Fvb3-1-augustus-gene-118.23	11838128	11850791	-	Replication, recombination and repair	Molecular Function: DNA clamp loader activity (GO:0003689);; Molecular Function: ATP binding (GO:0005524);; Cellular Component: nucleus (GO:0005634);; Cellular Component: DNA replication factor C complex (GO:0005663);; Biological Process: DNA replication (GO:0006260);; Biological Process: DNA repair (GO:0006281);	K10754	Replication, recombination and repair	BRCA1 C Terminus (BRCT) domain	Replication factor C subunit 1 OS=Arabidopsis thaliana OX=3702 GN=RFC1 PE=2 SV=1	Replication factor C subunit 1 OS=Rosa chinensis OX=74649 GN=RchiOBHm_Chr5g0051061 PE=3 SV=1	Replication, recombination and repair	LOW QUALITY PROTEIN: replication factor C subunit 1 [Fragaria vesca subsp. vesca]
							maker-Fvb3-1-augustus-gene-119.19	11907012	11911798	+	--	--	--	--	--	--	Uncharacterized protein OS=Rosa chinensis OX=74649 GN=RchiOBHm_Chr5g0051191 PE=4 SV=1	--	uncharacterized protein LOC101314727 [Fragaria vesca subsp. vesca]
							maker-Fvb3-1-augustus-gene-119.20	11911969	11914046	+	--	Molecular Function: ubiquitin activating enzyme activity (GO:0004839);; Molecular Function: ATP binding (GO:0005524);; Molecular Function: transferase activity, transferring acyl groups (GO:0016746);	K06688	Posttranslational modification, protein turnover, chaperones	Ubiquitin-conjugating enzyme	Ubiquitin-conjugating enzyme E2 20 OS=Arabidopsis thaliana OX=3702 GN=UBC20 PE=2 SV=1	Putative aminoacyltransferase, E1 ubiquitin-activating enzyme OS=Rosa chinensis OX=74649 GN=RchiOBHm_Chr5g0051201 PE=3 SV=1	Posttranslational modification, protein turnover, chaperones	ubiquitin-conjugating enzyme E2 20 [Fragaria vesca subsp. vesca]
							maker-Fvb3-1-augustus-gene-119.23	11879369	11889136	-	Coenzyme transport and metabolism	Molecular Function: ATP binding (GO:0005524);; Cellular Component: chloroplast (GO:0009507);; Biological Process: photosynthesis (GO:0015979);; Biological Process: chlorophyll biosynthetic process (GO:0015995);; Molecular Function: magnesium chelatase activity (GO:0016851);	K03404	--	von Willebrand factor type A domain	Magnesium-chelatase subunit ChlD, chloroplastic OS=Nicotiana tabacum OX=4097 GN=CHLD PE=2 SV=1	Mg-protoporphyrin IX chelatase OS=Rosa chinensis OX=74649 GN=RchiOBHm_Chr5g0051161 PE=3 SV=1	Cytoskeleton	magnesium-chelatase subunit ChlD, chloroplastic [Fragaria vesca subsp. vesca]
							maker-Fvb3-1-augustus-gene-119.24	11889622	11902439	-	--	Molecular Function: metal ion binding (GO:0046872);	--	--	DDT domain	DDT domain-containing protein PTM OS=Arabidopsis thaliana OX=3702 GN=PTM PE=1 SV=1	Putative transcription factor & chromatin remodeling DDT family OS=Rosa chinensis OX=74649 GN=RchiOBHm_Chr5g0051171 PE=4 SV=1	--	uncharacterized protein LOC101311539 isoform X2 [Fragaria vesca subsp. vesca]
							maker-Fvb3-1-snap-gene-118.25	11786995	11790079	+	Translation, ribosomal structure and biogenesis	Molecular Function: mRNA binding (GO:0003729);; Cellular Component: nucleus (GO:0005634);; Cellular Component: cytoplasm (GO:0005737);; Biological Process: RNA processing (GO:0006396);	K12876	General function prediction only	RNA recognition motif. (a.k.a. RRM, RBD, or RNP domain)	RNA-binding protein Y14 OS=Arabidopsis thaliana OX=3702 GN=Y14 PE=1 SV=1	Putative RNA-binding motif protein OS=Rosa chinensis OX=74649 GN=RchiOBHm_Chr5g0053031 PE=3 SV=1	RNA processing and modification	RNA-binding protein 8A-B [Fragaria vesca subsp. vesca]
							maker-Fvb3-1-snap-gene-118.27	11796443	11814194	+	--	Molecular Function: RNA binding (GO:0003723);; Molecular Function: metal ion binding (GO:0046872);	--	--	RNA recognition motif. (a.k.a. RRM, RBD, or RNP domain)	Zinc finger CCCH domain-containing protein 55 OS=Arabidopsis thaliana OX=3702 GN=At5g12440 PE=2 SV=3	Putative transcription factor C3H family OS=Rosa chinensis OX=74649 GN=RchiOBHm_Chr5g0053291 PE=4 SV=1	RNA processing and modification	zinc finger CCCH domain-containing protein 55-like isoform X1 [Fragaria vesca subsp. vesca]
							maker-Fvb3-1-snap-gene-118.32	11852567	11855934	-
							maker-Fvb3-1-snap-gene-119.34	11913191	11919615	-
							snap_masked-Fvb3-1-processed-gene-117.20	11739603	11740858	+
							snap_masked-Fvb3-1-processed-gene-117.22	11752489	11752959	+
							snap_masked-Fvb3-1-processed-gene-119.6	11888836	11890008	+
Fvb3-1	11970001	12100000	129999	11	0.295746	16.9115
							augustus_masked-Fvb3-1-processed-gene-120.0	11995440	11996767	-	--	--	K13800	General function prediction only	PPR repeat family	Pentatricopeptide repeat-containing protein At4g39952, mitochondrial OS=Arabidopsis thaliana OX=3702 GN=PCMP-E98 PE=2 SV=2	Putative tetratricopeptide-like helical domain-containing protein OS=Rosa chinensis OX=74649 GN=RchiOBHm_Chr1g0327501 PE=4 SV=1	Function unknown	putative tetratricopeptide-like helical domain-containing protein [Rosa chinensis]
							augustus_masked-Fvb3-1-processed-gene-120.1	11996792	11997472	-
							augustus_masked-Fvb3-1-processed-gene-120.3	12063127	12064879	+	--	--	--	--	--	--	Uncharacterized protein (Fragment) OS=Davidia involucrata OX=16924 GN=Din_045056 PE=4 SV=1	--	uncharacterized protein LOC105351434 [Fragaria vesca subsp. vesca]
							maker-Fvb3-1-augustus-gene-120.21	12025971	12036110	+	--	Molecular Function: methyltransferase activity (GO:0008168);; Biological Process: methylation (GO:0032259);	--	--	Lysine methyltransferase	--	Methyltransferase family protein isoform 4 OS=Hibiscus syriacus OX=106335 GN=F3Y22_tig00110893pilonHSYRG00905 PE=4 SV=1	Function unknown	protein N-lysine methyltransferase METTL21A [Fragaria vesca subsp. vesca]
							maker-Fvb3-1-augustus-gene-121.28	12092184	12110774	+	Function unknown	Molecular Function: DNA helicase activity (GO:0003678);; Molecular Function: ATP binding (GO:0005524);; Cellular Component: nucleus (GO:0005634);	K11367	Transcription	SNF2 family N-terminal domain	Protein CHROMATIN REMODELING 5 OS=Arabidopsis thaliana OX=3702 GN=CHR5 PE=1 SV=1	Putative DNA helicase chromatin remodeling SNF2 family OS=Rosa chinensis OX=74649 GN=RchiOBHm_Chr5g0050791 PE=4 SV=1	Transcription	LOW QUALITY PROTEIN: protein CHROMATIN REMODELING 5 [Fragaria vesca subsp. vesca]
							maker-Fvb3-1-snap-gene-120.26	12016185	12025558	+	--	Molecular Function: methyltransferase activity (GO:0008168);; Biological Process: methylation (GO:0032259);	K00599	--	Lysine methyltransferase	--	Methyltransferase family protein isoform 4 OS=Hibiscus syriacus OX=106335 GN=F3Y22_tig00110893pilonHSYRG00905 PE=4 SV=1	Function unknown	protein N-lysine methyltransferase METTL21A [Fragaria vesca subsp. vesca]
							maker-Fvb3-1-snap-gene-120.29	11986460	11990865	-
							maker-Fvb3-1-snap-gene-120.30	12001329	12008021	-	Nucleotide transport and metabolism	Molecular Function: pseudouridylate synthase activity (GO:0004730);; Molecular Function: hydrolase activity, acting on glycosyl bonds (GO:0016798);	K16329	General function prediction only	Indigoidine synthase A like protein	--	Putative pseudouridylate synthase OS=Rosa chinensis OX=74649 GN=RchiOBHm_Chr5g0050911 PE=3 SV=1	Secondary metabolites biosynthesis, transport and catabolism	pseudouridine-metabolizing bifunctional protein C1861.05 [Fragaria vesca subsp. vesca]
							maker-Fvb3-1-snap-gene-120.31	12074614	12079631	-	--	Biological Process: phytochromobilin biosynthetic process (GO:0010024);; Molecular Function: phytochromobilin:ferredoxin oxidoreductase activity (GO:0050619);; Molecular Function: cobalt ion binding (GO:0050897);	K08101	--	Ferredoxin-dependent bilin reductase	Phytochromobilin:ferredoxin oxidoreductase, chloroplastic OS=Arabidopsis thaliana OX=3702 GN=HY2 PE=2 SV=1	Putative phytochromobilin:ferredoxin oxidoreductase OS=Rosa chinensis OX=74649 GN=RchiOBHm_Chr5g0050821 PE=3 SV=1	Function unknown	phytochromobilin:ferredoxin oxidoreductase, chloroplastic [Rosa chinensis]
							maker-Fvb3-1-snap-gene-120.32	12080880	12087078	-	--	Biological Process: Group II intron splicing (GO:0000373);; Molecular Function: RNA binding (GO:0003723);	K01148	Replication, recombination and repair	CRS1 / YhbY (CRM) domain	CRM-domain containing factor CFM3A, chloroplastic/mitochondrial OS=Arabidopsis thaliana OX=3702 GN=CFM3A PE=2 SV=1	Putative RNA-binding, CRM domain, CRM-domain containing factor CFM3 OS=Rosa chinensis OX=74649 GN=RchiOBHm_Chr5g0050811 PE=4 SV=1	Replication, recombination and repair	chloroplastic group IIA intron splicing facilitator CRS1, chloroplastic-like [Fragaria vesca subsp. vesca]
							snap_masked-Fvb3-1-processed-gene-120.7	11999609	11999949	+
Fvb3-1	12650001	12840000	189999	21	0.318853	4.70824
							augustus_masked-Fvb3-1-processed-gene-127.3	12730178	12731401	-	--	Cellular Component: cellular_component (GO:0005575);; Cellular Component: cell wall (GO:0005618);; Cellular Component: obsolete cell (GO:0005623);; Cellular Component: plasma membrane (GO:0005886);; Biological Process: multicellular organism development (GO:0007275);; Biological Process: biological_process (GO:0008150);; Cellular Component: membrane (GO:0016020);; Biological Process: root system …	--	--	Fasciclin domain	Fasciclin-like arabinogalactan protein 1 OS=Arabidopsis thaliana OX=3702 GN=FLA1 PE=1 SV=1	Putative fasciclin-like arabinogalactan protein OS=Rosa chinensis OX=74649 GN=RchiOBHm_Chr5g0053441 PE=3 SV=1	Function unknown	fasciclin-like arabinogalactan protein 1 [Fragaria vesca subsp. vesca]
							augustus_masked-Fvb3-1-processed-gene-127.4	12757177	12757587	-	--	Biological Process: regulation of DNA endoreduplication (GO:0032875);	--	--	--	Cyclin-dependent protein kinase inhibitor SMR13 OS=Arabidopsis thaliana OX=3702 GN=SMR13 PE=4 SV=1	Uncharacterized protein OS=Rosa chinensis OX=74649 GN=RchiOBHm_Chr5g0052211 PE=4 SV=1	Function unknown	cyclin-dependent protein kinase inhibitor SMR9 [Rosa chinensis]
							augustus_masked-Fvb3-1-processed-gene-127.6	12777611	12777925	-	--	--	--	--	--	Photosystem II 5 kDa protein, chloroplastic OS=Gossypium hirsutum OX=3635 GN=PSBT PE=4 SV=1	Uncharacterized protein OS=Rosa chinensis OX=74649 GN=RchiOBHm_Chr5g0052351 PE=4 SV=1	Function unknown	photosystem II 5 kDa protein, chloroplastic [Rosa chinensis]
							augustus_masked-Fvb3-1-processed-gene-128.2	12797905	12800652	-	--	Molecular Function: protein serine/threonine kinase activity (GO:0004674);	K04728	--	PWWP domain	Serine/threonine-protein kinase ATM OS=Arabidopsis thaliana OX=3702 GN=ATM PE=1 SV=1	Putative non-specific serine/threonine protein kinase OS=Rosa chinensis OX=74649 GN=RchiOBHm_Chr7g0223491 PE=4 SV=1	--	serine/threonine-protein kinase ATM-like [Fragaria vesca subsp. vesca]
							maker-Fvb3-1-augustus-gene-126.11	12649975	12656799	+	Signal transduction mechanisms	Molecular Function: protein serine/threonine kinase activity (GO:0004674);; Molecular Function: ATP binding (GO:0005524);; Biological Process: signal transduction (GO:0007165);	K07198	Signal transduction mechanisms	Protein kinase domain	CBL-interacting serine/threonine-protein kinase 3 OS=Arabidopsis thaliana OX=3702 GN=CIPK3 PE=1 SV=2	Non-specific serine/threonine protein kinase OS=Rosa chinensis OX=74649 GN=RchiOBHm_Chr5g0050061 PE=3 SV=1	Signal transduction mechanisms	CBL-interacting serine/threonine-protein kinase 3 isoform X1 [Fragaria vesca subsp. vesca]
							maker-Fvb3-1-augustus-gene-127.14	12771381	12776112	+	Inorganic ion transport and metabolism	Molecular Function: heme binding (GO:0020037);; Molecular Function: sulfite reductase (ferredoxin) activity (GO:0050311);; Molecular Function: 4 iron, 4 sulfur cluster binding (GO:0051539);	K00392	Inorganic ion transport and metabolism	Nitrite and sulphite reductase 4Fe-4S domain	Sulfite reductase [ferredoxin], chloroplastic OS=Pisum sativum OX=3888 GN=SIR PE=1 SV=2	Assimilatory sulfite reductase (ferredoxin) OS=Rosa chinensis OX=74649 GN=RchiOBHm_Chr5g0052341 PE=3 SV=1	Inorganic ion transport and metabolism	sulfite reductase [ferredoxin], chloroplastic [Fragaria vesca subsp. vesca]
							maker-Fvb3-1-augustus-gene-127.15	12699536	12702437	-	--	--	--	--	--	--	Uncharacterized protein OS=Rosa chinensis OX=74649 GN=RchiOBHm_Chr5g0053011 PE=4 SV=1	--	uncharacterized protein LOC101292284 isoform X1 [Fragaria vesca subsp. vesca]
							maker-Fvb3-1-augustus-gene-127.16	12763058	12766293	-	--	--	--	Defense mechanisms	--	--	Uncharacterized protein OS=Rosa chinensis OX=74649 GN=RchiOBHm_Chr5g0052391 PE=4 SV=1	Defense mechanisms	cingulin isoform X2 [Fragaria vesca subsp. vesca]
							maker-Fvb3-1-augustus-gene-128.30	12787262	12790318	+	--	--	--	Defense mechanisms	--	--	Uncharacterized protein OS=Rosa chinensis OX=74649 GN=RchiOBHm_Chr5g0052391 PE=4 SV=1	Defense mechanisms	cingulin isoform X1 [Fragaria vesca subsp. vesca]
							maker-Fvb3-1-augustus-gene-128.32	12792983	12795474	+	--	Biological Process: proteolysis (GO:0006508);; Molecular Function: serine-type peptidase activity (GO:0008236);; Molecular Function: dipeptidyl-peptidase activity (GO:0008239);	K01285	--	Serine carboxypeptidase S28	Probable serine protease EDA2 OS=Arabidopsis thaliana OX=3702 GN=EDA2 PE=2 SV=2	Uncharacterized protein OS=Populus trichocarpa OX=3694 GN=POPTR_010G232300 PE=3 SV=2	Posttranslational modification, protein turnover, chaperones	lysosomal Pro-X carboxypeptidase-like [Fragaria vesca subsp. vesca]
							maker-Fvb3-1-augustus-gene-128.33	12805940	12809055	+	--	--	--	--	Protein of unknown function (DUF1138)	--	Uncharacterized protein OS=Rosa chinensis OX=74649 GN=RchiOBHm_Chr5g0052401 PE=4 SV=1	Function unknown	uncharacterized protein LOC101292182 [Fragaria vesca subsp. vesca]
							maker-Fvb3-1-augustus-gene-128.38	12819368	12822016	-	--	Cellular Component: TIM22 mitochondrial import inner membrane insertion complex (GO:0042721);; Biological Process: protein insertion into mitochondrial inner membrane (GO:0045039);	K17790	Intracellular trafficking, secretion, and vesicular transport	Tim17/Tim22/Tim23/Pmp24 family	Mitochondrial import inner membrane translocase subunit TIM22-3 OS=Arabidopsis thaliana OX=3702 GN=TIM22-3 PE=2 SV=1	Mitochondrial inner membrane translocase subunit Tim17/Tim22/Tim23/peroxisomal protein PMP24 OS=Rosa chinensis OX=74649 GN=RchiOBHm_Chr5g0042411 PE=4 SV=1	Intracellular trafficking, secretion, and vesicular transport	mitochondrial import inner membrane translocase subunit TIM22-3-like [Fragaria vesca subsp. vesca]
[truncated: 2,392 more rows]
